# Supplementary material
Source: PubMed Central journal article supplement (PMC1104185)
Supplement: plntphys_pp.104.053793_2.pdf [file plntphys_pp.104.053793_2.pdf]

| #  | NAME                           | Q_TRACE | PRED_RT | Constitutive starvation, date point 1 (c1) |             |         |         |
|----|--------------------------------|---------|---------|--------------------------------------------|-------------|---------|---------|
|    |                                |         |         | Avg Resp nS                                | Avg Resp -S | R -S/nS | P-value |
| 1  | 1090DK05#4896#1-t-caffeoquinic | 307     | 46.502  | 0.000060573                                | 0.000095699 | 1.58    | 0.067   |
| 2  | 1090DK05#4896#1-t-caffeoquinic | 324     | 46.502  | 0.000053783                                | 0.000041068 | 0.76    | 0.369   |
| 3  | 1090DK05#4896#1-t-caffeoquinic | 219     | 46.502  | 0.000521300                                | 0.001664611 | 3.19    | 0.064   |
| 4  | 1164CC35#1780#arginine 5       | 256     | 26.181  | 0.165292724                                | 0.032057299 | 0.19    | 0.007   |
| 5  | 1164CC35#1780#arginine 5       | 157     | 26.181  | 0.201511549                                | 0.055256322 | 0.27    | 0.048   |
| 6  | 1164CC37#1216                  | 243     | 20.159  | 0.166784596                                | 0.351016237 | 2.10    | 0.010   |
| 7  | 1164CC37#1220                  | 142     | 20.257  | 0.005587138                                | 0.074055187 | 13.25   | 0.000   |
| 8  | 1164CC37#1267                  | 232     | 20.717  | 0.038140107                                | 0.026666912 | 0.70    | 0.687   |
| 9  | 1164CC37#1280                  | 155     | 20.807  | 0.605126957                                | 1.992530736 | 3.29    | 0.063   |
| 10 | 1164CC37#1378                  | 301     | 21.835  | 0.089781637                                | 0.394717723 | 4.40    | 0.031   |
| 11 | 1164CC37#1378                  | 227     | 21.835  | 0.137638689                                | 0.964206147 | 7.01    | 0.023   |
| 12 | 1164CC37#1378                  | 344     | 21.835  | 0.061929442                                | 0.515496204 | 8.32    | 0.019   |
| 13 | 1164CC37#1705#glutamine 3      | 156     | 25.296  | 2.741375736                                | 3.056730814 | 1.12    | 0.703   |
| 14 | 1164CC37#1705#glutamine 3      | 245     | 25.296  | 0.761116492                                | 4.867542122 | 6.40    | 0.000   |
| 15 | 1164CC37#1965                  | 204     | 28.073  | 1.659389898                                | 1.402389380 | 0.85    | 0.572   |
| 16 | 1194BK05#2052#ornithine 4      | 420     | 25.990  | 0.242915355                                | 0.015408520 | 0.06    | 0.291   |
| 17 | 1194BK05#2052#ornithine 4      | 142     | 25.990  | 1.019464985                                | 0.302680726 | 0.30    | 0.020   |
| 18 | 1194BK05#2052#ornithine 4      | 174     | 25.990  | 0.481237580                                | 0.157284102 | 0.33    | 0.050   |
| 19 | 1194BK09#2389#glutamine 4      | 227     | 28.996  | 0.089305237                                | 0.464465102 | 5.20    | 0.027   |
| 20 | 1194BK09#2389#glutamine 4      | 317     | 28.996  | 0.030046604                                | 0.115324438 | 3.84    | 0.034   |
| 21 | 1194BK09#2389#glutamine 4      | 156     | 28.996  | 0.023985160                                | 0.117810810 | 4.91    | 0.025   |
| 22 | 1194BK11#1453#t-4-HO-proline   | 230     | 20.567  | 0.370785675                                | 1.279342915 | 3.45    | 0.000   |
| 23 | 1194BK11#1453#t-4-HO-proline   | 140     | 20.567  | 0.083518040                                | 0.296852502 | 3.55    | 0.000   |
| 24 | 1194BK11#1453#t-4-HO-proline   | 304     | 20.567  | 0.796098505                                | 0.000246428 | 0.00    | 0.374   |
| 25 | 1194BK15#1922#arginine 3       | 174     | 24.834  | 0.262651227                                | 0.012709694 | 0.05    | 0.040   |
| 26 | 1194BK15#1922#ornithine 3      | 174     | 24.834  | 0.281603412                                | 0.012709694 | 0.05    | 0.019   |
| 27 | 1194BK15#1922#ornithine 3      | 186     | 24.834  | 0.083850699                                | 0.003827030 | 0.05    | 0.011   |
| 28 | 1194BK15#1922#ornithine 3      | 348     | 24.834  | 0.093620136                                | 0.001002717 | 0.01    | 0.254   |
| 29 | 1194BK15#2050#arginine 4       | 142     | 25.990  | 0.931218393                                | 0.302680726 | 0.33    | 0.074   |
| 30 | 1194BK20#2225#gal MX2          | 160     | 27.625  | 2.183457591                                | 2.912987491 | 1.33    | 0.253   |
| 31 | 1215BK02#1748#arabinose MX     | 217     | 23.253  | 0.042349864                                | 0.046116585 | 1.09    | 0.472   |
| 32 | 1215BK02#1748#arabinose MX     | 307     | 23.253  | 0.019893930                                | 0.024408552 | 1.23    | 0.354   |
| 33 | 1215BK02#1753#arabinose MX     | 160     | 23.253  | 0.019228301                                | 0.011502291 | 0.60    | 0.324   |
| 34 | 1215BK03#1782#ribose MX        | 217     | 23.568  | 0.020876991                                | 0.028263215 | 1.35    | 0.211   |
| 35 | 1215BK04#1717#xylose MX1       | 307     | 22.988  | 0.004159023                                | 0.004921184 | 1.18    | 0.406   |
| 36 | 1215BK04#1717#xylose MX1       | 160     | 22.988  | 0.001948443                                | 0.001679009 | 0.86    | 0.124   |
| 37 | 1215BK04#1738#xylose MX2       | 160     | 23.178  | 0.010483076                                | 0.011502291 | 1.10    | 0.616   |
| 38 | 1215BK05#3504#maltose MX1      | 480     | 39.300  | 0.000751953                                | 0.000389543 | 0.52    | 0.229   |
| 39 | 1215BK05#3540#maltose MX2      | 204     | 39.594  | 0.006360726                                | 0.004424860 | 0.70    | 0.653   |
| 40 | 1215BK07#1896#fucose MX1       | 160     | 24.395  | 0.014726288                                | 0.013727698 | 0.93    | 0.179   |
| 41 | 1215BK07#1896#fucose MX1       | 160     | 24.395  | 0.146827301                                | 0.013727698 | 0.09    | 0.371   |
| 42 | 1215BK07#1896#fucose MX2       | 160     | 24.595  | 0.008602422                                | 0.002858122 | 0.33    | 0.372   |
| 43 | 1215BK07#1896#fucose MX2       | 117     | 24.595  | 0.025165347                                | 0.029441368 | 1.17    | 0.541   |
| 44 | 1215BK09#2256#mannitol         | 319     | 27.889  | 0.058854011                                | 0.022734495 | 0.39    | 0.448   |
| 45 | 1215BK09#2256#mannitol         | 307     | 27.889  | 0.001941115                                | 0.051696029 | 26.63   | 0.381   |
| 46 | 1215BK09#2256#mannitol         | 421     | 27.889  | 0.001267728                                | 0.000354706 | 0.28    | 0.167   |
| 47 | 1215BK11#1416#erythritol       | 205     | 20.277  | 0.010533911                                | 0.010195165 | 0.97    | 0.893   |
| 48 | 1215BK11#1416#erythritol       | 320     | 20.277  | 0.001253178                                | 0.000809240 | 0.65    | 0.091   |
| 49 | 1215BK11#1416#erythritol       | 293     | 20.277  | 0.001783531                                | 0.001485609 | 0.83    | 0.112   |
| 50 | 1215BK12#2269#sorbitol         | 319     | 28.002  | 0.013559185                                | 0.022734495 | 1.68    | 0.106   |
| 51 | 1215BK12#2269#sorbitol         | 307     | 28.002  | 0.001878938                                | 0.001137032 | 0.61    | 0.433   |
| 52 | 1215BK12#2269#sorbitol         | 419     | 28.002  | 0.002856326                                | 0.000308026 | 0.11    | 0.368   |
| 53 | 1215BK13#2273#galactitol       | 307     | 28.086  | 0.003540478                                | 0.000576700 | 0.16    | 0.026   |
| 54 | 1215BK13#2273#galactitol       | 421     | 28.086  | 0.001124652                                | 0.000211464 | 0.19    | 0.334   |
| 55 | 1215BK13#2273#galactitol       | 331     | 28.086  | 0.003528779                                | 0.002442797 | 0.69    | 0.334   |
| 56 | 1215BK14#1835#xylitol          | 307     | 24.083  | 0.000698802                                | 0.000643695 | 0.92    | 0.823   |
| 57 | 1215BK14#1835#xylitol          | 319     | 24.083  | 0.017243755                                | 0.060338732 | 3.50    | 0.283   |
| 58 | 1215BK15#3625#maltitol         | 191     | 40.453  | 0.004040189                                | 0.002919004 | 0.72    | 0.415   |
| 59 | 1215BK15#3625#maltitol         | 361     | 40.453  | 0.006456937                                | 0.008473196 | 1.31    | 0.328   |
| 60 | 1215BK16#1857#rhamnose MX1     | 364     | 24.249  | 0.003156373                                | 0.000484166 | 0.15    | 0.368   |
| 61 | 1215BK16#1867#rhamnose MX2     | 117     | 24.348  | 0.560956298                                | 0.666697178 | 1.19    | 0.485   |

|     |                                |     |        |             |             |      |       |
|-----|--------------------------------|-----|--------|-------------|-------------|------|-------|
| 62  | 1215BK16#1867#rhamnose MX2     | 160 | 24.348 | 0.014057250 | 0.013727698 | 0.98 | 0.745 |
| 63  | 1215BK22#1328#citramalic       | 349 | 19.462 | 0.000460611 | 0.000071845 | 0.16 | 0.309 |
| 64  | 1215BK22#1328#citramalic       | 247 | 19.462 | 0.004369652 | 0.000866774 | 0.20 | 0.234 |
| 65  | 1215BK38#1269#homoserine 3     | 218 | 19.050 | 0.003215463 | 0.004534135 | 1.41 | 0.164 |
| 66  | 1215BK38#1269#homoserine 3     | 292 | 19.050 | 0.000472940 | 0.000160333 | 0.34 | 0.363 |
| 67  | 1215BK38#1557#a-kt-glutaric MX | 198 | 21.703 | 0.004013403 | 0.005745232 | 1.43 | 0.076 |
| 68  | 1215BK38#1557#a-kt-glutaric MX | 288 | 21.703 | 0.001450000 | 0.001870302 | 1.29 | 0.016 |
| 69  | 1215BK38#1557#a-kt-glutaric MX | 304 | 21.703 | 0.002577732 | 0.001581944 | 0.61 | 0.518 |
| 70  | 1215BK38#1724#homocysteine 3   | 234 | 23.251 | 0.002412007 | 0.003489833 | 1.45 | 0.151 |
| 71  | 1215BK38#1724#homocysteine 3   | 351 | 23.251 | 0.000086161 | 0.000234252 | 2.72 | 0.150 |
| 72  | 1215BK38#1724#homocysteine 3   | 261 | 23.251 | 0.005246445 | 0.000320233 | 0.06 | 0.368 |
| 73  | 1215BK38#2153#gal MX1          | 160 | 27.304 | 0.154142675 | 0.139813161 | 0.91 | 0.667 |
| 74  | 1215BK38#2153#gal MX1          | 319 | 27.304 | 0.269803655 | 0.313221253 | 1.16 | 0.159 |
| 75  | 1215BK38#2153#gal MX1          | 205 | 27.304 | 0.250027372 | 0.349512744 | 1.40 | 0.087 |
| 76  | 1215BK38#2207#c-ferulic        | 293 | 27.793 | 0.006355469 | 0.007899376 | 1.24 | 0.876 |
| 77  | 1215BK38#2207#c-ferulic        | 249 | 27.793 | 0.001844056 | 0.000719894 | 0.39 | 0.451 |
| 78  | 1215BK38#2207#c-ferulic        | 338 | 27.793 | 0.000814033 | 0.000281623 | 0.35 | 0.438 |
| 79  | 1215BK38#2439#c-sinapic        | 338 | 30.024 | 0.012518674 | 0.016797865 | 1.34 | 0.024 |
| 80  | 1215BK38#2439#c-sinapic        | 368 | 30.024 | 0.010308936 | 0.015766712 | 1.53 | 0.045 |
| 81  | 1215BK38#2439#c-sinapic        | 323 | 29.907 | 0.003264169 | 0.005500159 | 1.69 | 0.068 |
| 82  | 1219BK04#2184#galactonic-1,4-L | 334 | 27.254 | 0.046706646 | 0.065056392 | 1.39 | 0.641 |
| 83  | 1219BK04#2184#galactonic-1,4-L | 361 | 27.254 | 0.025537440 | 0.008715312 | 0.34 | 0.349 |
| 84  | 1219BK04#2184#galactonic-1,4-L | 466 | 27.254 | 0.063106587 | 0.097216860 | 1.54 | 0.318 |
| 85  | 1219BK05#2185#a-kt-gulonic MX  | 349 | 27.346 | 0.020228244 | 0.003791181 | 0.19 | 0.440 |
| 86  | 1219BK05#2185#a-kt-gulonic MX  | 186 | 27.346 | 0.064860935 | 0.067650996 | 1.04 | 0.926 |
| 87  | 1219BK07#2218#gulonic-1,4-L    | 333 | 27.850 | 0.009366323 | 0.015498992 | 1.65 | 0.086 |
| 88  | 1219BK07#2218#gulonic-1,4-L    | 466 | 27.850 | 0.000656673 | 0.000266315 | 0.41 | 0.532 |
| 89  | 1219BK07#2218#gulonic-1,4-L    | 243 | 27.850 | 0.022285518 | 0.036018565 | 1.62 | 0.467 |
| 90  | 1248BK08#0805                  | 117 | 14.496 | 0.017052683 | 0.012059910 | 0.71 | 0.071 |
| 91  | 1248BK08#0815#benzoic          | 179 | 14.591 | 0.015992724 | 0.016044463 | 1.00 | 0.984 |
| 92  | 1248BK08#0815#benzoic          | 105 | 14.591 | 0.013499417 | 0.013192756 | 0.98 | 0.865 |
| 93  | 1248BK08#0856#urea             | 189 | 14.931 | 0.189234213 | 0.016752615 | 0.09 | 0.397 |
| 94  | 1248BK08#0931#threonine 2      | 219 | 15.643 | 0.053201446 | 0.080885989 | 1.52 | 0.011 |
| 95  | 1248BK08#0931#threonine 2      | 117 | 15.643 | 0.169146281 | 0.262380735 | 1.55 | 0.025 |
| 96  | 1248BK08#0953#glycine 3        | 174 | 15.840 | 0.139463025 | 0.366121471 | 2.63 | 0.000 |
| 97  | 1248BK08#0953#glycine 3        | 248 | 15.840 | 0.021099743 | 0.055560435 | 2.63 | 0.000 |
| 98  | 1248BK08#0990                  | 306 | 16.178 | 0.001225882 | 0.000040590 | 0.03 | 0.361 |
| 99  | 1248BK08#1020                  | 184 | 16.441 | 0.029958897 | 0.049496425 | 1.65 | 0.316 |
| 100 | 1248BK08#1020                  | 285 | 16.441 | 0.008857166 | 0.015555030 | 1.76 | 0.284 |
| 101 | 1248BK08#1043#uracil 2         | 241 | 16.639 | 0.027620733 | 0.002166107 | 0.08 | 0.385 |
| 102 | 1248BK08#1056                  | 259 | 16.761 | 0.000678265 | 0.000254757 | 0.38 | 0.415 |
| 103 | 1248BK08#1107#thymine 2        | 255 | 17.231 | 0.054636835 | 0.000452904 | 0.01 | 0.373 |
| 104 | 1248BK08#1121                  | 257 | 17.348 | 0.000247452 | 0.000055197 | 0.22 | 0.395 |
| 105 | 1248BK08#1128                  | 141 | 17.420 | 0.006513324 | 0.014114751 | 2.17 | 0.024 |
| 106 | 1248BK08#1180                  | 142 | 17.888 | 0.002225169 | 0.004955047 | 2.23 | 0.005 |
| 107 | 1248BK08#1196                  | 259 | 18.041 | 0.000746511 | 0.000418651 | 0.56 | 0.560 |
| 108 | 1248BK08#1214                  | 242 | 18.194 | 0.002948477 | 0.000075025 | 0.03 | 0.374 |
| 109 | 1248BK08#1214                  | 234 | 18.194 | 0.034570904 | 0.046056114 | 1.33 | 0.752 |
| 110 | 1248BK08#1225                  | 104 | 18.293 | 0.003357741 | 0.002536584 | 0.76 | 0.309 |
| 111 | 1248BK08#1249#b-alanine 3      | 248 | 18.526 | 0.017786140 | 0.063307415 | 3.56 | 0.000 |
| 112 | 1248BK08#1249#b-alanine 3      | 290 | 18.526 | 0.009954391 | 0.016030085 | 1.61 | 0.260 |
| 113 | 1248BK08#1249#b-alanine 3      | 174 | 18.526 | 0.026592523 | 0.091001323 | 3.42 | 0.000 |
| 114 | 1248BK08#1308#homoserine 3     | 128 | 19.050 | 0.001602836 | 0.001723722 | 1.08 | 0.648 |
| 115 | 1248BK08#1340                  | 255 | 19.313 | 0.007035478 | 0.001767827 | 0.25 | 0.408 |
| 116 | 1248BK08#1368                  | 155 | 19.569 | 0.103634863 | 0.451162631 | 4.35 | 0.000 |
| 117 | 1248BK08#1368                  | 229 | 19.565 | 0.007938248 | 0.024344730 | 3.07 | 0.000 |
| 118 | 1248BK08#1446                  | 306 | 20.299 | 0.001498263 | 0.004271479 | 2.85 | 0.329 |
| 119 | 1248BK08#1463#methionine 2     | 176 | 20.453 | 0.008163866 | 0.006616203 | 0.81 | 0.122 |
| 120 | 1248BK08#1463#methionine 2     | 128 | 20.453 | 0.005805734 | 0.008680134 | 1.50 | 0.247 |
| 121 | 1248BK08#1527                  | 120 | 21.054 | 0.046242355 | 0.021937480 | 0.47 | 0.455 |
| 122 | 1248BK08#1540#cysteine 3       | 294 | 21.171 | 0.004143764 | 0.007016604 | 1.69 | 0.597 |
| 123 | 1248BK08#1540#cysteine 3       | 220 | 21.171 | 0.002866427 | 0.002130341 | 0.74 | 0.350 |
| 124 | 1248BK08#1568                  | 162 | 21.424 | 0.009970527 | 0.011556754 | 1.16 | 0.540 |

|     |                              |     |        |             |             |        |       |
|-----|------------------------------|-----|--------|-------------|-------------|--------|-------|
| 125 | 1248BK08#1568                | 218 | 21.424 | 0.026004456 | 0.026306860 | 1.01   | 0.975 |
| 126 | 1248BK08#1630                | 188 | 21.984 | 0.087361338 | 0.178518823 | 2.04   | 0.022 |
| 127 | 1248BK08#1641                | 305 | 22.084 | 0.037376926 | 0.032512296 | 0.87   | 0.830 |
| 128 | 1248BK08#1669                | 142 | 22.339 | 0.058603207 | 0.016282828 | 0.28   | 0.036 |
| 129 | 1248BK08#1669                | 348 | 22.339 | 0.004277119 | 0.001231839 | 0.29   | 0.021 |
| 130 | 1248BK08#1695                | 188 | 22.592 | 0.002327167 | 0.010387597 | 4.46   | 0.044 |
| 131 | 1248BK08#1695                | 216 | 22.592 | 0.007428851 | 0.003486659 | 0.47   | 0.507 |
| 132 | 1248BK08#1841                | 275 | 23.932 | 0.084482185 | 0.478079359 | 5.66   | 0.000 |
| 133 | 1248BK08#1852                | 173 | 24.032 | 0.089089852 | 0.392559970 | 4.41   | 0.000 |
| 134 | 1248BK08#1888                | 156 | 24.340 | 0.136727882 | 0.001508294 | 0.01   | 0.369 |
| 135 | 1248BK08#1907                | 227 | 24.517 | 0.003942951 | 0.390823210 | 99.12  | 0.023 |
| 136 | 1248BK08#1907                | 203 | 24.517 | 0.002951476 | 0.307533796 | 104.20 | 0.023 |
| 137 | 1248BK08#1907                | 317 | 24.517 | 0.001162176 | 0.109750099 | 94.43  | 0.022 |
| 138 | 1248BK08#1940                | 216 | 24.844 | 0.077068207 | 0.001447232 | 0.02   | 0.362 |
| 139 | 1248BK08#1948                | 216 | 24.919 | 0.000770712 | 0.001181362 | 1.53   | 0.353 |
| 140 | 1248BK08#1969                | 333 | 25.113 | 0.007845717 | 0.005688342 | 0.73   | 0.566 |
| 141 | 1248BK08#1969                | 292 | 25.113 | 0.019855680 | 0.027871328 | 1.40   | 0.012 |
| 142 | 1248BK08#2056                | 461 | 25.911 | 0.000255162 | 0.000066369 | 0.26   | 0.347 |
| 143 | 1248BK08#2056                | 371 | 25.911 | 0.000212766 | 0.000281182 | 1.32   | 0.705 |
| 144 | 1248BK08#2056                | 257 | 25.911 | 0.001877055 | 0.019007949 | 10.13  | 0.133 |
| 145 | 1248BK08#2264#lysine 4       | 156 | 27.765 | 0.059639985 | 0.076421285 | 1.28   | 0.150 |
| 146 | 1248BK08#2264#lysine 4       | 317 | 27.765 | 0.048502419 | 0.041571797 | 0.86   | 0.638 |
| 147 | 1248BK08#2264#lysine 4       | 174 | 27.765 | 0.592886861 | 0.114762002 | 0.19   | 0.385 |
| 148 | 1248BK08#2323                | 217 | 28.410 | 0.069505908 | 0.101023228 | 1.45   | 0.424 |
| 149 | 1248BK08#2323                | 361 | 28.410 | 0.020981721 | 0.027892849 | 1.33   | 0.486 |
| 150 | 1248BK08#2406#saccharic      | 333 | 29.208 | 0.002510485 | 0.002609051 | 1.04   | 0.376 |
| 151 | 1248BK08#2411                | 433 | 29.287 | 0.000680152 | 0.000428500 | 0.63   | 0.562 |
| 152 | 1248BK08#2411                | 205 | 29.287 | 0.002042568 | 0.002869740 | 1.40   | 0.050 |
| 153 | 1248BK08#2429                | 393 | 29.460 | 0.006542276 | 0.001877991 | 0.29   | 0.344 |
| 154 | 1248BK08#2495                | 204 | 30.096 | 0.002161724 | 0.003653076 | 1.69   | 0.511 |
| 155 | 1248BK08#2495                | 539 | 30.096 | 0.002599349 | 0.000016042 | 0.01   | 0.373 |
| 156 | 1248BK08#2495                | 333 | 29.751 | 0.006010989 | 0.007589472 | 1.26   | 0.355 |
| 157 | 1248BK08#2568                | 245 | 30.794 | 0.000210528 | 0.000080474 | 0.38   | 0.083 |
| 158 | 1248BK08#2568                | 257 | 30.794 | 0.000097079 | 0.000728114 | 7.50   | 0.002 |
| 159 | 1248BK08#2568                | 292 | 30.794 | 0.005168041 | 0.000128431 | 0.02   | 0.368 |
| 160 | 1248BK08#2588                | 228 | 30.986 | 0.002447317 | 0.000208205 | 0.09   | 0.380 |
| 161 | 1248BK08#2664                | 437 | 31.721 | 0.000266746 | 0.000272082 | 1.02   | 0.970 |
| 162 | 1248BK08#2720#9,12(Z,Z)-18:2 | 337 | 32.269 | 0.000337468 | 0.000148443 | 0.44   | 0.461 |
| 163 | 1248BK08#2771                | 373 | 32.768 | 0.010282813 | 0.000067432 | 0.01   | 0.374 |
| 164 | 1248BK08#2796                | 373 | 33.013 | 0.002752324 | 0.000060672 | 0.02   | 0.377 |
| 165 | 1248BK08#2876                | 337 | 33.808 | 0.008935708 | 0.007122329 | 0.80   | 0.484 |
| 166 | 1248BK08#2876                | 217 | 33.820 | 0.018997959 | 0.014368840 | 0.76   | 0.317 |
| 167 | 1248BK08#2876                | 361 | 33.820 | 0.008969235 | 0.003138668 | 0.35   | 0.337 |
| 168 | 1248BK08#2949                | 433 | 34.530 | 0.000115453 | 0.000416193 | 3.60   | 0.069 |
| 169 | 1248BK08#2983                | 387 | 34.866 | 0.000074541 | 0.000083224 | 1.12   | 0.816 |
| 170 | 1248BK08#2983                | 299 | 34.866 | 0.000166165 | 0.000102171 | 0.61   | 0.254 |
| 171 | 1248BK08#3000                | 289 | 35.048 | 0.000110967 | 0.000097824 | 0.88   | 0.557 |
| 172 | 1248BK08#3018                | 334 | 35.216 | 0.000066395 | 0.000130959 | 1.97   | 0.101 |
| 173 | 1248BK08#3036                | 289 | 35.396 | 0.000089038 | 0.000068175 | 0.77   | 0.570 |
| 174 | 1248BK08#3036                | 334 | 35.396 | 0.000107064 | 0.000288503 | 2.69   | 0.021 |
| 175 | 1248BK08#3086                | 401 | 35.894 | 0.000131042 | 0.000055568 | 0.42   | 0.399 |
| 176 | 1248BK08#3086                | 437 | 35.894 | 0.000050754 | 0.000050785 | 1.00   | 0.999 |
| 177 | 1248BK08#3103                | 260 | 36.064 | 0.000190413 | 0.000105157 | 0.55   | 0.372 |
| 178 | 1248BK08#3131                | 446 | 36.344 | 0.000772079 | 0.006088027 | 7.89   | 0.023 |
| 179 | 1248BK08#3177                | 313 | 36.806 | 0.014687546 | 0.000647735 | 0.04   | 0.389 |
| 180 | 1248BK08#3192                | 387 | 36.957 | 0.000211838 | 0.000781900 | 3.69   | 0.001 |
| 181 | 1248BK08#3192                | 299 | 36.957 | 0.000151497 | 0.000830212 | 5.48   | 0.003 |
| 182 | 1248BK08#3192                | 471 | 36.957 | 0.001451488 | 0.000112661 | 0.08   | 0.400 |
| 183 | 1248BK08#3196                | 324 | 37.007 | 0.000051116 | 0.000598383 | 11.71  | 0.075 |
| 184 | 1248BK08#3223                | 287 | 37.271 | 0.000141347 | 0.000344848 | 2.44   | 0.058 |
| 185 | 1248BK08#3233                | 401 | 37.373 | 0.004086485 | 0.000048935 | 0.01   | 0.375 |
| 186 | 1248BK08#3359                | 491 | 38.628 | 0.000084205 | 0.000019521 | 0.23   | 0.354 |
| 187 | 1248BK08#3365                | 480 | 38.701 | 0.000254243 | 0.000223052 | 0.88   | 0.642 |

|     |                         |     |        |             |             |       |       |
|-----|-------------------------|-----|--------|-------------|-------------|-------|-------|
| 188 | 1248BK08#3365           | 307 | 38.701 | 0.000458857 | 0.000659137 | 1.44  | 0.160 |
| 189 | 1248BK08#3383           | 307 | 38.885 | 0.003875180 | 0.001741167 | 0.45  | 0.440 |
| 190 | 1248BK08#3385           | 295 | 38.914 | 0.001144168 | 0.000375466 | 0.33  | 0.101 |
| 191 | 1248BK08#3405           | 322 | 39.118 | 0.002881145 | 0.000179582 | 0.06  | 0.377 |
| 192 | 1248BK08#3412           | 473 | 39.178 | 0.000060473 | 0.000021367 | 0.35  | 0.244 |
| 193 | 1248BK08#3447           | 437 | 39.532 | 0.002191393 | 0.003336254 | 1.52  | 0.102 |
| 194 | 1248BK08#3456           | 361 | 39.623 | 0.006679979 | 0.009983398 | 1.49  | 0.057 |
| 195 | 1248BK08#3463           | 288 | 39.693 | 0.001929797 | 0.000054542 | 0.03  | 0.373 |
| 196 | 1248BK08#3468           | 437 | 39.743 | 0.001047213 | 0.001291236 | 1.23  | 0.793 |
| 197 | 1248BK08#3479           | 437 | 39.855 | 0.000354451 | 0.000595247 | 1.68  | 0.032 |
| 198 | 1248BK08#3581           | 539 | 40.856 | 0.001285028 | 0.000027520 | 0.02  | 0.376 |
| 199 | 1248BK08#3589           | 396 | 40.937 | 0.000503614 | 0.000015182 | 0.03  | 0.360 |
| 200 | 1248BK08#3589           | 361 | 40.937 | 0.001213096 | 0.003490594 | 2.88  | 0.022 |
| 201 | 1248BK08#3606           | 285 | 41.112 | 0.000069274 | 0.000058606 | 0.85  | 0.639 |
| 202 | 1248BK08#3627           | 296 | 41.303 | 0.000235875 | 0.000402151 | 1.70  | 0.040 |
| 203 | 1248BK08#3643           | 479 | 41.457 | 0.000161869 | 0.000018468 | 0.11  | 0.369 |
| 204 | 1248BK08#3773           | 446 | 42.694 | 0.000013153 | 0.000029695 | 2.26  | 0.101 |
| 205 | 1248BK08#3773           | 229 | 42.694 | 0.001644661 | 0.007521715 | 4.57  | 0.001 |
| 206 | 1248BK08#4003           | 259 | 44.854 | 0.000776091 | 0.000154992 | 0.20  | 0.000 |
| 207 | 1248BK08#4172#raffinose | 437 | 46.417 | 0.000093438 | 0.003999497 | 42.80 | 0.022 |
| 208 | 1248BK08#4172#raffinose | 451 | 46.417 | 0.000062841 | 0.001406593 | 22.38 | 0.022 |
| 209 | 1248BK08#4172#raffinose | 361 | 46.417 | 0.001079228 | 0.019688482 | 18.24 | 0.000 |
| 210 | 1248BK08#4180           | 437 | 46.509 | 0.000208532 | 0.002619976 | 12.56 | 0.106 |
| 211 | 1248BK08#4180           | 204 | 46.509 | 0.001106971 | 0.011603638 | 10.48 | 0.002 |
| 212 | 1248BK08#4180           | 217 | 46.509 | 0.001104670 | 0.011598252 | 10.50 | 0.018 |
| 213 | 1248BK08#4186           | 451 | 46.633 | 0.000144952 | 0.001475746 | 10.18 | 0.014 |
| 214 | 1250BK34#0703#dodecane  | 85  | 13.194 | 1.430178577 | 1.311620042 | 0.92  | 0.353 |
| 215 | 1263BK24#0843           | 174 | 14.907 | 0.959198984 | 0.683661013 | 0.71  | 0.002 |
| 216 | 1263BK24#0864#leucine 2 | 158 | 15.095 | 0.026932550 | 0.045221142 | 1.68  | 0.048 |
| 217 | 1263BK24#0864#leucine 2 | 232 | 15.095 | 0.001002401 | 0.001563125 | 1.56  | 0.037 |
| 218 | 1263BK24#0874#glycerol  | 117 | 15.184 | 0.061474840 | 0.048716563 | 0.79  | 0.234 |
| 219 | 1263BK24#0874#glycerol  | 205 | 15.184 | 0.078691153 | 0.077840926 | 0.99  | 0.960 |
| 220 | 1263BK24#0874#glycerol  | 218 | 15.184 | 0.023625481 | 0.028529536 | 1.21  | 0.505 |
| 221 | 1263BK24#0874#glycerol  | 293 | 15.184 | 0.374672511 | 0.002262208 | 0.01  | 0.374 |
| 222 | 1263BK24#0960           | 174 | 15.965 | 2.563104456 | 4.343278176 | 1.69  | 0.051 |
| 223 | 1263BK24#1089           | 156 | 17.123 | 0.001100848 | 0.001247640 | 1.13  | 0.787 |
| 224 | 1263BK24#1089           | 215 | 17.123 | 0.031836773 | 0.000836077 | 0.03  | 0.293 |
| 225 | 1263BK24#1215           | 219 | 18.264 | 0.003250913 | 0.006686914 | 2.06  | 0.012 |
| 226 | 1263BK24#1243           | 228 | 18.516 | 0.044836855 | 0.019333945 | 0.43  | 0.410 |
| 227 | 1263BK24#1446           | 188 | 20.361 | 0.003650800 | 0.003615991 | 0.99  | 0.971 |
| 228 | 1263BK24#1633           | 292 | 22.057 | 0.001477026 | 0.002248732 | 1.52  | 0.015 |
| 229 | 1263BK24#1633           | 117 | 22.057 | 0.001958150 | 0.001310867 | 0.67  | 0.239 |
| 230 | 1263BK24#1743           | 257 | 23.051 | 0.004788865 | 0.004575181 | 0.96  | 0.857 |
| 231 | 1263BK24#1785           | 150 | 23.426 | 0.001127020 | 0.001348341 | 1.20  | 0.791 |
| 232 | 1263BK24#1785           | 272 | 23.426 | 0.020538959 | 0.014117388 | 0.69  | 0.716 |
| 233 | 1263BK24#1861           | 303 | 24.109 | 0.002461183 | 0.002970670 | 1.21  | 0.394 |
| 234 | 1263BK24#1907           | 357 | 24.532 | 0.010482185 | 0.000652575 | 0.06  | 0.393 |
| 235 | 1263BK24#1910           | 416 | 24.554 | 0.003795445 | 0.008848289 | 2.33  | 0.007 |
| 236 | 1263BK24#1994           | 133 | 25.314 | 0.700884334 | 0.156776381 | 0.22  | 0.356 |
| 237 | 1263BK24#2004           | 244 | 25.433 | 0.004316726 | 0.003870382 | 0.90  | 0.717 |
| 238 | 1263BK24#2026           | 194 | 25.595 | 0.001074822 | 0.001020327 | 0.95  | 0.696 |
| 239 | 1263BK24#2047           | 437 | 25.800 | 0.003062171 | 0.001805090 | 0.59  | 0.298 |
| 240 | 1263BK24#2063           | 345 | 25.931 | 0.001457634 | 0.001403099 | 0.96  | 0.877 |
| 241 | 1263BK24#2063           | 435 | 25.931 | 0.001234242 | 0.001214036 | 0.98  | 0.953 |
| 242 | 1263BK24#2154           | 144 | 26.771 | 0.001618256 | 0.000847573 | 0.52  | 0.284 |
| 243 | 1263BK24#2154           | 307 | 26.771 | 0.001580154 | 0.000362782 | 0.23  | 0.157 |
| 244 | 1263BK24#2269           | 234 | 27.828 | 0.001979169 | 0.002121009 | 1.07  | 0.804 |
| 245 | 1263BK24#2295#tyrosine  | 218 | 28.072 | 0.095642957 | 0.150514243 | 1.57  | 0.076 |
| 246 | 1263BK24#2295#tyrosine  | 280 | 28.072 | 0.400068056 | 0.012365953 | 0.03  | 0.382 |
| 247 | 1263BK24#2476           | 319 | 29.726 | 0.063633139 | 0.000358255 | 0.01  | 0.374 |
| 248 | 1263BK24#2679           | 300 | 31.578 | 0.000158635 | 0.000072619 | 0.46  | 0.007 |
| 249 | 1263BK24#2679           | 228 | 31.578 | 0.000951880 | 0.000192043 | 0.20  | 0.432 |
| 250 | 1263BK24#2697           | 458 | 31.740 | 0.000054720 | 0.000037775 | 0.69  | 0.673 |

|     |                               |     |        |             |             |      |       |
|-----|-------------------------------|-----|--------|-------------|-------------|------|-------|
| 251 | 1263BK24#2727                 | 235 | 32.014 | 0.001146400 | 0.002767415 | 2.41 | 0.010 |
| 252 | 1263BK24#2772                 | 328 | 32.434 | 0.001739417 | 0.007359080 | 4.23 | 0.048 |
| 253 | 1263BK24#2814#spermidine      | 174 | 32.824 | 0.001252791 | 0.005939500 | 4.74 | 0.002 |
| 254 | 1263BK24#2814#spermidine      | 144 | 32.824 | 0.000962431 | 0.006313904 | 6.56 | 0.001 |
| 255 | 1263BK24#2994                 | 351 | 34.452 | 0.000774650 | 0.000088494 | 0.11 | 0.320 |
| 256 | 1263BK24#3026                 | 329 | 34.745 | 0.000075600 | 0.000090036 | 1.19 | 0.743 |
| 257 | 1263BK24#3026                 | 318 | 34.745 | 0.000166349 | 0.000062759 | 0.38 | 0.056 |
| 258 | 1263BK24#3069                 | 338 | 35.147 | 0.000137188 | 0.000106919 | 0.78 | 0.520 |
| 259 | 1263BK24#3069                 | 144 | 35.147 | 0.000708778 | 0.000269704 | 0.38 | 0.364 |
| 260 | 1263BK24#3137                 | 174 | 35.772 | 0.000314465 | 0.000291894 | 0.93 | 0.825 |
| 261 | 1263BK24#3155                 | 174 | 35.937 | 0.000100901 | 0.000317235 | 3.14 | 0.004 |
| 262 | 1263BK24#3155                 | 398 | 35.937 | 0.000052947 | 0.000048286 | 0.91 | 0.861 |
| 263 | 1263BK24#3171                 | 174 | 36.084 | 0.000093225 | 0.000228700 | 2.45 | 0.166 |
| 264 | 1263BK24#3472                 | 204 | 38.850 | 0.005256116 | 0.005097899 | 0.97 | 0.962 |
| 265 | 1263BK24#4315                 | 174 | 46.628 | 0.000105259 | 0.000187986 | 1.79 | 0.146 |
| 266 | 1263BK24#4440                 | 174 | 47.803 | 0.000158511 | 0.000114758 | 0.72 | 0.397 |
| 267 | 1263BK25#0632                 | 86  | 13.044 | 0.040542665 | 0.014775877 | 0.36 | 0.261 |
| 268 | 1263BK25#2215                 | 191 | 27.318 | 0.307495967 | 0.037067334 | 0.12 | 0.387 |
| 269 | 1263BK25#2215                 | 204 | 27.318 | 0.425648588 | 0.614538318 | 1.44 | 0.578 |
| 270 | 1263BK25#3658                 | 267 | 40.547 | 0.000407238 | 0.000120297 | 0.30 | 0.378 |
| 271 | 1263BK50#2309                 | 299 | 28.231 | 0.003495466 | 0.003846713 | 1.10 | 0.791 |
| 272 | 1263BK50#2309                 | 360 | 28.231 | 0.000395519 | 0.000352637 | 0.89 | 0.745 |
| 273 | 1263BK50#2309                 | 494 | 28.231 | 0.000711865 | 0.000103122 | 0.14 | 0.393 |
| 274 | 1267BK12#0266                 | 207 | 9.830  | 0.033578312 | 0.005907538 | 0.18 | 0.342 |
| 275 | 1267BK12#0266                 | 295 | 9.830  | 0.466705409 | 0.176549613 | 0.38 | 0.440 |
| 276 | 1267BK12#0289#lactic          | 117 | 10.035 | 0.077236638 | 0.002998916 | 0.04 | 0.382 |
| 277 | 1267BK12#0289#lactic          | 219 | 10.035 | 0.007724132 | 0.049565488 | 6.42 | 0.392 |
| 278 | 1267BK12#0326                 | 173 | 10.400 | 5.238382407 | 7.355576711 | 1.40 | 0.482 |
| 279 | 1267BK12#0362                 | 217 | 10.685 | 0.197798829 | 0.185551117 | 0.94 | 0.877 |
| 280 | 1267BK12#0362                 | 202 | 10.685 | 2.048200291 | 0.520598622 | 0.25 | 0.422 |
| 281 | 1267BK12#0403#alanine 2       | 116 | 11.052 | 0.049651763 | 0.063473927 | 1.28 | 0.580 |
| 282 | 1267BK12#0422#hydroxylamine   | 133 | 11.221 | 0.307482014 | 0.016929007 | 0.06 | 0.188 |
| 283 | 1267BK12#0422#hydroxylamine   | 249 | 11.221 | 0.460839644 | 0.667347481 | 1.45 | 0.135 |
| 284 | 1267BK12#0494#cy-siloxane 5   | 267 | 11.864 | 0.022780759 | 0.025309920 | 1.11 | 0.389 |
| 285 | 1267BK12#0503                 | 219 | 11.945 | 0.116480998 | 0.148577417 | 1.28 | 0.554 |
| 286 | 1267BK12#0503                 | 190 | 11.945 | 0.009010715 | 0.000059659 | 0.01 | 0.178 |
| 287 | 1267BK12#0516                 | 235 | 12.061 | 0.091538841 | 0.005346063 | 0.06 | 0.107 |
| 288 | 1267BK12#0531                 | 142 | 12.194 | 0.025730534 | 0.060567664 | 2.35 | 0.027 |
| 289 | 1267BK12#0531                 | 174 | 12.194 | 0.012832498 | 0.000708257 | 0.06 | 0.198 |
| 290 | 1267BK12#0616#me-phosphoric 2 | 241 | 12.963 | 0.018564747 | 0.028320329 | 1.53 | 0.290 |
| 291 | 1267BK12#0666#dodecane        | 85  | 13.402 | 1.433458427 | 1.314597850 | 0.92 | 0.363 |
| 292 | 1267BK12#0688                 | 233 | 13.600 | 0.003424508 | 0.000508011 | 0.15 | 0.398 |
| 293 | 1267BK12#0707#valine 2        | 144 | 13.770 | 0.083960409 | 0.164745428 | 1.96 | 0.006 |
| 294 | 1267BK12#0707#valine 2        | 218 | 13.770 | 0.013060605 | 0.026770581 | 2.05 | 0.008 |
| 295 | 1267BK12#0725                 | 156 | 13.931 | 0.020970999 | 0.004003470 | 0.19 | 0.392 |
| 296 | 1267BK12#0737#siloxane 5      | 281 | 14.039 | 0.014541323 | 0.015698539 | 1.08 | 0.761 |
| 297 | 1267BK12#0784                 | 248 | 14.459 | 0.012257848 | 0.019519796 | 1.59 | 0.180 |
| 298 | 1267BK12#0824#serine 2        | 116 | 14.818 | 0.831163985 | 1.547333991 | 1.86 | 0.000 |
| 299 | 1267BK12#0824#serine 2        | 132 | 14.818 | 0.688739029 | 1.708557613 | 2.48 | 0.001 |
| 300 | 1267BK12#0848                 | 415 | 15.033 | 0.000770236 | 0.000277737 | 0.36 | 0.164 |
| 301 | 1267BK12#0848                 | 261 | 15.033 | 0.002052312 | 0.000208614 | 0.10 | 0.303 |
| 302 | 1267BK12#0858#phosphoric 3    | 299 | 15.123 | 1.506797693 | 3.095070125 | 2.05 | 0.005 |
| 303 | 1267BK12#0858#phosphoric 3    | 314 | 15.123 | 0.254519189 | 0.877212578 | 3.45 | 0.000 |
| 304 | 1267BK12#0909#isoleucine 2    | 158 | 15.580 | 0.026795518 | 0.048227581 | 1.80 | 0.014 |
| 305 | 1267BK12#0909#isoleucine 2    | 218 | 15.580 | 0.013993909 | 0.007813627 | 0.56 | 0.525 |
| 306 | 1267BK12#0917#proline 2       | 216 | 15.643 | 0.002766467 | 0.000506701 | 0.18 | 0.335 |
| 307 | 1267BK12#0917#proline 2       | 142 | 15.643 | 0.047105400 | 0.014920756 | 0.32 | 0.435 |
| 308 | 1267BK12#0923#nicotinic       | 136 | 15.697 | 0.004278354 | 0.007402807 | 1.73 | 0.149 |
| 309 | 1267BK12#0923#nicotinic       | 180 | 15.697 | 0.003715961 | 0.011859814 | 3.19 | 0.015 |
| 310 | 1267BK12#0931#cy-siloxane 6   | 341 | 15.777 | 0.003670571 | 0.003211293 | 0.87 | 0.795 |
| 311 | 1267BK12#0945#maleic          | 245 | 15.903 | 0.008688277 | 0.003400552 | 0.39 | 0.453 |
| 312 | 1267BK12#0945#maleic          | 147 | 15.903 | 0.072424190 | 0.040062809 | 0.55 | 0.362 |
| 313 | 1267BK12#0970#d4-succinic     | 251 | 16.127 | 0.000085243 | 0.000065761 | 0.77 | 0.565 |



|     |                            |     |        |             |             |      |       |
|-----|----------------------------|-----|--------|-------------|-------------|------|-------|
| 314 | 1267BK12#0970#d4-succinic  | 251 | 16.127 | 0.000083839 | 0.000097461 | 1.16 | 0.847 |
| 315 | 1267BK12#0970#succinic     | 147 | 16.127 | 0.074738051 | 0.077019562 | 1.03 | 0.594 |
| 316 | 1267BK12#0970#succinic     | 147 | 16.127 | 0.075135873 | 0.076810282 | 1.02 | 0.659 |
| 317 | 1267BK12#0970#succinic     | 247 | 16.127 | 0.007151725 | 0.007802788 | 1.09 | 0.250 |
| 318 | 1267BK12#0970#succinic     | 247 | 16.127 | 0.007143928 | 0.007802788 | 1.09 | 0.247 |
| 319 | 1267BK12#0970#succinic     | 247 | 16.127 | 0.019659148 | 0.007802788 | 0.40 | 0.386 |
| 320 | 1267BK12#0970#succinic     | 147 | 16.127 | 0.595052537 | 0.077019562 | 0.13 | 0.374 |
| 321 | 1267BK12#0998              | 261 | 16.379 | 0.013784668 | 0.000216991 | 0.02 | 0.376 |
| 322 | 1267BK12#0998              | 147 | 16.379 | 0.061494426 | 0.077209091 | 1.26 | 0.372 |
| 323 | 1267BK12#1009#glyceric     | 189 | 16.478 | 0.114305258 | 0.149801449 | 1.31 | 0.046 |
| 324 | 1267BK12#1009#glyceric     | 292 | 16.478 | 0.064128431 | 0.084749399 | 1.32 | 0.084 |
| 325 | 1267BK12#1059#fumaric      | 147 | 16.926 | 0.555176490 | 0.436898033 | 0.79 | 0.609 |
| 326 | 1267BK12#1059#fumaric      | 245 | 16.926 | 0.284918383 | 0.232795941 | 0.82 | 0.405 |
| 327 | 1267BK12#1067              | 188 | 16.998 | 0.232991512 | 0.140522589 | 0.60 | 0.558 |
| 328 | 1267BK12#1082#serine 3     | 218 | 17.133 | 0.317285626 | 0.563469535 | 1.78 | 0.005 |
| 329 | 1267BK12#1102              | 306 | 17.313 | 0.001099208 | 0.000840642 | 0.76 | 0.019 |
| 330 | 1267BK12#1102              | 233 | 17.313 | 0.001064390 | 0.001066220 | 1.00 | 0.992 |
| 331 | 1267BK12#1114              | 247 | 17.421 | 0.003290316 | 0.003769625 | 1.15 | 0.642 |
| 332 | 1267BK12#1143#threonine 3  | 219 | 17.681 | 0.047462668 | 0.088404784 | 1.86 | 0.003 |
| 333 | 1267BK12#1143#threonine 3  | 291 | 17.681 | 0.016294761 | 0.031450156 | 1.93 | 0.002 |
| 334 | 1267BK12#1164              | 191 | 17.869 | 0.012050555 | 0.001019524 | 0.08 | 0.380 |
| 335 | 1267BK12#1175              | 197 | 17.968 | 0.002566505 | 0.003914431 | 1.53 | 0.448 |
| 336 | 1267BK12#1195              | 174 | 18.149 | 0.017138999 | 0.024834111 | 1.45 | 0.363 |
| 337 | 1267BK12#1220              | 174 | 18.373 | 0.032834408 | 0.046348084 | 1.41 | 0.404 |
| 338 | 1267BK12#1237              | 160 | 18.526 | 0.115127617 | 0.132194736 | 1.15 | 0.663 |
| 339 | 1267BK12#1247              | 247 | 18.616 | 0.013126247 | 0.010032893 | 0.76 | 0.198 |
| 340 | 1267BK12#1270              | 172 | 18.832 | 0.002685945 | 0.000382608 | 0.14 | 0.399 |
| 341 | 1267BK12#1278              | 174 | 18.895 | 0.002624161 | 0.003653405 | 1.39 | 0.366 |
| 342 | 1267BK12#1278              | 168 | 18.895 | 0.001394724 | 0.001816605 | 1.30 | 0.380 |
| 343 | 1267BK12#1298              | 350 | 19.025 | 0.004698941 | 0.006399820 | 1.36 | 0.082 |
| 344 | 1267BK12#1303              | 174 | 19.120 | 0.031312361 | 0.054734575 | 1.75 | 0.037 |
| 345 | 1267BK12#1309              | 174 | 19.174 | 0.042407957 | 0.059436017 | 1.40 | 0.175 |
| 346 | 1267BK12#1334              | 281 | 19.454 | 0.022234078 | 0.015569074 | 0.70 | 0.134 |
| 347 | 1267BK12#1345              | 173 | 19.498 | 0.013870133 | 0.010746990 | 0.77 | 0.289 |
| 348 | 1267BK12#1345              | 103 | 19.498 | 0.019002818 | 0.023433660 | 1.23 | 0.410 |
| 349 | 1267BK12#1369              | 234 | 19.715 | 0.036568659 | 0.010127895 | 0.28 | 0.250 |
| 350 | 1267BK12#1390#malic        | 233 | 19.916 | 0.143349528 | 0.201520463 | 1.41 | 0.122 |
| 351 | 1267BK12#1390#malic        | 335 | 19.916 | 0.025164206 | 0.031876229 | 1.27 | 0.031 |
| 352 | 1267BK12#1406#pentadecane  | 85  | 20.057 | 2.228250094 | 2.124316123 | 0.95 | 0.512 |
| 353 | 1267BK12#1410              | 217 | 20.105 | 0.006002912 | 0.021871411 | 3.64 | 0.000 |
| 354 | 1267BK12#1410              | 293 | 20.105 | 0.035068099 | 0.001552542 | 0.04 | 0.364 |
| 355 | 1267BK12#1428              | 111 | 20.239 | 0.006626789 | 0.007421438 | 1.12 | 0.761 |
| 356 | 1267BK12#1428              | 275 | 20.239 | 0.002449075 | 0.001176095 | 0.48 | 0.294 |
| 357 | 1267BK12#1438              | 237 | 20.347 | 0.006040301 | 0.006471686 | 1.07 | 0.626 |
| 358 | 1267BK12#1457#aspartic 3   | 218 | 20.518 | 0.187855770 | 0.116210710 | 0.62 | 0.466 |
| 359 | 1267BK12#1457#aspartic 3   | 232 | 20.518 | 0.439072034 | 0.672008174 | 1.53 | 0.105 |
| 360 | 1267BK12#1457#aspartic 3   | 306 | 20.518 | 0.012190418 | 0.014606981 | 1.20 | 0.068 |
| 361 | 1267BK12#1457#pyroglutamic | 156 | 20.518 | 3.476897793 | 5.001236833 | 1.44 | 0.338 |
| 362 | 1267BK12#1457#pyroglutamic | 258 | 20.518 | 0.488184864 | 1.396052071 | 2.86 | 0.000 |
| 363 | 1267BK12#1457#pyroglutamic | 230 | 20.518 | 0.360899825 | 1.282982755 | 3.55 | 0.000 |
| 364 | 1267BK12#1485              | 84  | 20.771 | 0.090817051 | 0.183153009 | 2.02 | 0.015 |
| 365 | 1267BK12#1492              | 263 | 20.834 | 0.337586527 | 0.143021660 | 0.42 | 0.371 |
| 366 | 1267BK12#1507              | 292 | 20.970 | 0.142303639 | 0.141979301 | 1.00 | 0.957 |
| 367 | 1267BK12#1520              | 249 | 21.069 | 0.002935471 | 0.000394942 | 0.13 | 0.359 |
| 368 | 1267BK12#1547#threonic     | 292 | 21.331 | 0.054303337 | 0.048534913 | 0.89 | 0.463 |
| 369 | 1267BK12#1547#threonic     | 220 | 21.331 | 0.036143640 | 0.029612273 | 0.82 | 0.143 |
| 370 | 1267BK12#1547#threonic     | 205 | 21.331 | 0.027147181 | 0.027700295 | 1.02 | 0.945 |
| 371 | 1267BK12#1569              | 160 | 21.529 | 0.002869306 | 0.001308681 | 0.46 | 0.330 |
| 372 | 1267BK12#1587              | 205 | 21.701 | 0.007936019 | 0.005471246 | 0.69 | 0.002 |
| 373 | 1267BK12#1609              | 71  | 21.891 | 0.113675340 | 0.129422344 | 1.14 | 0.631 |
| 374 | 1267BK12#1609              | 250 | 21.891 | 0.018232143 | 0.000491721 | 0.03 | 0.376 |
| 375 | 1267BK12#1627              | 342 | 22.043 | 0.004011111 | 0.001950785 | 0.49 | 0.377 |
| 376 | 1267BK12#1631#asparagine 4 | 188 | 22.088 | 0.091816935 | 0.178518823 | 1.94 | 0.008 |

|     |                               |     |        |             |             |        |         |
|-----|-------------------------------|-----|--------|-------------|-------------|--------|---------|
| 377 | 1267BK12#1631#asparagine 4    | 216 | 22.088 | 0.057927659 | 0.126704699 | 2.19   | 0.008   |
| 378 | 1267BK12#1631#asparagine 4    | 231 | 22.088 | 0.015676072 | 0.021281569 | 1.36   | 0.205   |
| 379 | 1267BK12#1674#glutamic 3      | 246 | 22.477 | 0.432179785 | 0.544228620 | 1.26   | 0.458   |
| 380 | 1267BK12#1674#glutamic 3      | 363 | 22.477 | 0.027120663 | 0.014523206 | 0.54   | 0.397   |
| 381 | 1267BK12#1680#phenylalanine 2 | 192 | 22.532 | 0.023455106 | 0.046621165 | 1.99   | 0.009   |
| 382 | 1267BK12#1680#phenylalanine 2 | 266 | 22.532 | 0.093973587 | 0.003631695 | 0.04   | 0.380   |
| 383 | 1267BK12#1733                 | 245 | 23.010 | 0.004330834 | 0.004088673 | 0.94   | 0.399   |
| 384 | 1267BK12#1751#xylose MX2      | 307 | 23.173 | 0.028503113 | 0.024422904 | 0.86   | 0.429   |
| 385 | 1267BK12#1751#xylose MX2      | 217 | 23.173 | 0.039543540 | 0.046954513 | 1.19   | 0.350   |
| 386 | 1267BK12#1765#arabinose MX2   | 307 | 23.299 | 0.014238753 | 0.016661777 | 1.17   | 0.678   |
| 387 | 1267BK12#1765#arabinose MX2   | 160 | 23.299 | 0.006651011 | 0.010014819 | 1.51   | 0.188   |
| 388 | 1267BK12#1779#asparagine 3    | 116 | 23.426 | 0.202266631 | 0.615207123 | 3.04   | 0.089   |
| 389 | 1267BK12#1779#asparagine 3    | 188 | 23.426 | 0.084484463 | 0.218290394 | 2.58   | 0.113   |
| 390 | 1267BK12#1794#ribose MX       | 307 | 23.570 | 0.008850926 | 0.010506591 | 1.19   | 0.252   |
| 391 | 1267BK12#1794#ribose MX       | 160 | 23.570 | 0.008605929 | 0.003917893 | 0.46   | 0.386   |
| 392 | 1267BK12#1809                 | 307 | 23.706 | 0.008264769 | 0.010489599 | 1.27   | 0.278   |
| 393 | 1267BK12#1824                 | 295 | 23.832 | 0.003224266 | 0.002006237 | 0.62   | 0.300   |
| 394 | 1267BK12#1824                 | 202 | 23.824 | 0.006782565 | 0.005148570 | 0.76   | 0.190   |
| 395 | 1267BK12#1827                 | 307 | 23.860 | 0.002131447 | 0.002092040 | 0.98   | 0.931   |
| 396 | 1267BK12#1837                 | 290 | 23.914 | 0.001536552 | 0.001380877 | 0.90   | 0.620   |
| 397 | 1267BK12#1846                 | 133 | 24.032 | 0.097664064 | 0.125039152 | 1.28   | 0.260   |
| 398 | 1267BK12#1849                 | 202 | 24.059 | 0.046260429 | 0.015126578 | 0.33   | 0.459   |
| 399 | 1267BK12#1859                 | 242 | 24.149 | 0.000645924 | 0.000833816 | 1.29   | 0.387   |
| 400 | 1267BK12#1859                 | 334 | 24.149 | 0.001222458 | 0.000711580 | 0.58   | 0.315   |
| 401 | 1267BK12#1870#rhamnose MX1    | 117 | 24.249 | 0.011378915 | 0.013808466 | 1.21   | 0.356   |
| 402 | 1267BK12#1870#rhamnose MX1    | 160 | 24.249 | 0.002121304 | 0.002475234 | 1.17   | 0.544   |
| 403 | 1267BK12#1877                 | 307 | 24.313 | 0.557734404 | 0.681748985 | 1.22   | 0.424   |
| 404 | 1267BK12#1885#ribitol         | 422 | 24.385 | 0.232678428 | 0.040902590 | 0.18   | 0.373   |
| 405 | 1267BK12#1885#ribitol         | 319 | 24.385 | 0.800184176 | 0.999066752 | 1.25   | 0.376   |
| 406 | 1267BK12#1885#ribitol TMS     | 319 | 24.395 | 1.000000000 | 1.000000000 | 1.00   | #DIV/0! |
| 407 | 1267BK12#1885#ribitol TMS     | 319 | 24.395 | 0.999941170 | 0.999066752 | 1.00   | 0.405   |
| 408 | 1267BK12#1885#ribitol TMS     | 307 | 24.395 | 0.691891151 | 0.681748985 | 0.99   | 0.178   |
| 409 | 1267BK12#1885#ribitol TMS     | 307 | 24.395 | 0.691891151 | 0.681748985 | 0.99   | 0.178   |
| 410 | 1267BK12#1885#ribitol TMS     | 422 | 24.395 | 0.041217249 | 0.040902590 | 0.99   | 0.747   |
| 411 | 1267BK12#1885#ribitol TMS     | 422 | 24.395 | 0.041217249 | 0.040902590 | 0.99   | 0.747   |
| 412 | 1267BK12#1896#putrescine 4    | 174 | 24.487 | 0.399712289 | 3.315346428 | 8.29   | 0.000   |
| 413 | 1267BK12#1903                 | 416 | 24.559 | 0.001846470 | 0.002933865 | 1.59   | 0.639   |
| 414 | 1267BK12#1908                 | 133 | 24.595 | 0.070205164 | 0.081707988 | 1.16   | 0.550   |
| 415 | 1267BK12#1916                 | 205 | 24.676 | 0.027924537 | 0.008463600 | 0.30   | 0.321   |
| 416 | 1267BK12#1918                 | 392 | 24.685 | 0.005140200 | 0.004360944 | 0.85   | 0.083   |
| 417 | 1267BK12#1918                 | 392 | 24.685 | 0.006408900 | 0.004736629 | 0.74   | 0.223   |
| 418 | 1267BK12#1925                 | 292 | 24.749 | 0.011833570 | 0.013048578 | 1.10   | 0.709   |
| 419 | 1267BK12#1925                 | 465 | 24.749 | 0.001144535 | 0.000017967 | 0.02   | 0.371   |
| 420 | 1267BK12#1940                 | 292 | 24.884 | 0.014613704 | 0.013048578 | 0.89   | 0.060   |
| 421 | 1267BK12#1940                 | 333 | 24.884 | 0.010594504 | 0.011500758 | 1.09   | 0.734   |
| 422 | 1267BK12#1946                 | 133 | 24.948 | 0.057828602 | 0.050052712 | 0.87   | 0.847   |
| 423 | 1267BK12#1953                 | 346 | 25.012 | 0.044240506 | 0.000419303 | 0.01   | 0.374   |
| 424 | 1267BK12#1953                 | 133 | 25.012 | 0.165337556 | 0.161209184 | 0.98   | 0.909   |
| 425 | 1267BK12#1961                 | 422 | 25.079 | 0.023027992 | 0.010141307 | 0.44   | 0.296   |
| 426 | 1267BK12#1961                 | 116 | 25.079 | 0.059291966 | 0.056165420 | 0.95   | 0.401   |
| 427 | 1267BK12#1967                 | 276 | 25.124 | 0.030956338 | 0.011499913 | 0.37   | 0.198   |
| 428 | 1267BK12#1967                 | 392 | 25.124 | 0.063390460 | 0.060980793 | 0.96   | 0.844   |
| 429 | 1267BK12#1967                 | 302 | 25.124 | 0.011484912 | 0.017849158 | 1.55   | 0.117   |
| 430 | 1267BK12#1970                 | 319 | 25.166 | 0.006923002 | 0.008439253 | 1.22   | 0.457   |
| 431 | 1267BK12#1970                 | 275 | 25.166 | 0.016447987 | 0.000458322 | 0.03   | 0.380   |
| 432 | 1267BK12#1970                 | 392 | 25.166 | 0.063470954 | 0.060980793 | 0.96   | 0.838   |
| 433 | 1267BK12#1997                 | 392 | 25.401 | 0.043550941 | 0.003296216 | 0.08   | 0.367   |
| 434 | 1267BK12#2001                 | 436 | 25.437 | 0.001216793 | 0.001318408 | 1.08   | 0.924   |
| 435 | 1267BK12#2008                 | 292 | 25.501 | 0.000241348 | 0.035936762 | 148.90 | 0.177   |
| 436 | 1267BK12#2019                 | 312 | 25.595 | 0.000851688 | 0.001614385 | 1.90   | 0.058   |
| 437 | 1267BK12#2025                 | 392 | 25.655 | 0.020031086 | 0.020825138 | 1.04   | 0.880   |
| 438 | 1267BK12#2025                 | 249 | 25.655 | 0.000899089 | 0.000713613 | 0.79   | 0.164   |
| 439 | 1267BK12#2030                 | 392 | 25.709 | 0.020161627 | 0.020825138 | 1.03   | 0.897   |

|     |                               |     |        |             |             |      |       |
|-----|-------------------------------|-----|--------|-------------|-------------|------|-------|
| 440 | 1267BK12#2030                 | 317 | 25.709 | 0.008464290 | 0.002613541 | 0.31 | 0.311 |
| 441 | 1267BK12#2038                 | 292 | 25.782 | 0.003019728 | 0.004512976 | 1.49 | 0.001 |
| 442 | 1267BK12#2038                 | 333 | 25.782 | 0.008356680 | 0.004912935 | 0.59 | 0.516 |
| 443 | 1267BK12#2053                 | 244 | 25.909 | 0.007175392 | 0.003547990 | 0.49 | 0.221 |
| 444 | 1267BK12#2062#shikimic        | 204 | 25.990 | 0.087225799 | 0.070861093 | 0.81 | 0.609 |
| 445 | 1267BK12#2062#shikimic        | 462 | 25.990 | 0.000793180 | 0.000430867 | 0.54 | 0.303 |
| 446 | 1267BK12#2062#shikimic        | 372 | 25.990 | 0.001149637 | 0.001129588 | 0.98 | 0.965 |
| 447 | 1267BK12#2074#citric          | 375 | 26.100 | 0.085715944 | 0.065519025 | 0.76 | 0.637 |
| 448 | 1267BK12#2074#citric          | 273 | 26.100 | 0.409728519 | 0.367732068 | 0.90 | 0.790 |
| 449 | 1267BK12#2081#isocitric       | 319 | 26.172 | 0.009962467 | 0.013676763 | 1.37 | 0.121 |
| 450 | 1267BK12#2087                 | 304 | 26.208 | 0.006186273 | 0.003393361 | 0.55 | 0.269 |
| 451 | 1267BK12#2114                 | 316 | 26.461 | 0.006943604 | 0.010784609 | 1.55 | 0.619 |
| 452 | 1267BK12#2114                 | 206 | 26.461 | 0.007619802 | 0.006220031 | 0.82 | 0.688 |
| 453 | 1267BK12#2124#dehydroascorbic | 316 | 26.552 | 0.033153649 | 0.024957968 | 0.75 | 0.388 |
| 454 | 1267BK12#2124#dehydroascorbic | 173 | 26.552 | 0.065407500 | 0.066690394 | 1.02 | 0.745 |
| 455 | 1267BK12#2124#dehydroascorbic | 157 | 26.552 | 0.050296121 | 0.054807279 | 1.09 | 0.531 |
| 456 | 1267BK12#2145#quinic          | 255 | 26.743 | 0.000549486 | 0.000655446 | 1.19 | 0.604 |
| 457 | 1267BK12#2145#quinic          | 345 | 26.743 | 0.005344760 | 0.000873995 | 0.16 | 0.407 |
| 458 | 1267BK12#2151                 | 260 | 26.798 | 0.007562049 | 0.003393336 | 0.45 | 0.447 |
| 459 | 1267BK12#2162                 | 149 | 26.924 | 0.101982329 | 0.119002433 | 1.17 | 0.565 |
| 460 | 1267BK12#2171#fru MX1         | 307 | 26.980 | 5.592992187 | 7.806974947 | 1.40 | 0.281 |
| 461 | 1267BK12#2171#fru MX1         | 569 | 26.980 | 0.059188484 | 0.071103674 | 1.20 | 0.553 |
| 462 | 1267BK12#2177                 | 389 | 27.026 | 0.081081831 | 0.003882667 | 0.05 | 0.380 |
| 463 | 1267BK12#2177                 | 157 | 27.026 | 1.309732416 | 0.427965258 | 0.33 | 0.422 |
| 464 | 1267BK12#2181                 | 307 | 27.082 | 4.044971642 | 7.428024820 | 1.84 | 0.157 |
| 465 | 1267BK12#2181                 | 245 | 27.082 | 0.036280176 | 0.049223900 | 1.36 | 0.552 |
| 466 | 1267BK12#2190#fru MX2         | 307 | 27.154 | 5.161789617 | 6.934460335 | 1.34 | 0.247 |
| 467 | 1267BK12#2190#fru MX2         | 569 | 27.154 | 1.098309519 | 0.073133564 | 0.07 | 0.377 |
| 468 | 1267BK12#2196#man MX          | 160 | 27.208 | 0.066228726 | 0.139813161 | 2.11 | 0.232 |
| 469 | 1267BK12#2196#man MX          | 319 | 27.208 | 1.250977612 | 0.313221253 | 0.25 | 0.399 |
| 470 | 1267BK12#2216#glc MX1         | 160 | 27.390 | 3.074133850 | 2.714484981 | 0.88 | 0.886 |
| 471 | 1267BK12#2216#glc MX1         | 466 | 27.390 | 0.063823446 | 0.008032700 | 0.13 | 0.082 |
| 472 | 1267BK12#2220#nonadecane      | 85  | 27.429 | 3.328068639 | 2.989405670 | 0.90 | 0.161 |
| 473 | 1267BK12#2237#tyramine        | 174 | 27.591 | 0.017644105 | 0.020070884 | 1.14 | 0.617 |
| 474 | 1267BK12#2237#tyramine        | 338 | 27.591 | 0.001031831 | 0.001058665 | 1.03 | 0.917 |
| 475 | 1267BK12#2248#glc MX2         | 160 | 27.691 | 2.866443540 | 2.912987491 | 1.02 | 0.797 |
| 476 | 1267BK12#2248#glc MX2         | 319 | 27.691 | 3.487374705 | 3.923487666 | 1.13 | 0.169 |
| 477 | 1267BK12#2259                 | 242 | 27.791 | 0.002349048 | 0.003588120 | 1.53 | 0.069 |
| 478 | 1267BK12#2259                 | 389 | 27.791 | 0.014084305 | 0.001348982 | 0.10 | 0.383 |
| 479 | 1267BK12#2265                 | 244 | 27.846 | 0.004267352 | 0.004943398 | 1.16 | 0.326 |
| 480 | 1267BK12#2270                 | 362 | 27.891 | 0.001408343 | 0.000780230 | 0.55 | 0.331 |
| 481 | 1267BK12#2285                 | 229 | 28.027 | 0.002928636 | 0.004533064 | 1.55 | 0.103 |
| 482 | 1267BK12#2285                 | 330 | 28.027 | 0.002270461 | 0.000969857 | 0.43 | 0.363 |
| 483 | 1267BK12#2290#tyrosine        | 354 | 28.073 | 0.023686645 | 0.003178309 | 0.13 | 0.416 |
| 484 | 1267BK12#2298                 | 404 | 28.137 | 0.007054117 | 0.004269613 | 0.61 | 0.518 |
| 485 | 1267BK12#2298                 | 244 | 28.137 | 0.018293373 | 0.028244187 | 1.54 | 0.073 |
| 486 | 1267BK12#2309#L-ascorbic      | 332 | 28.246 | 0.004445330 | 0.001776293 | 0.40 | 0.429 |
| 487 | 1267BK12#2309#L-ascorbic      | 449 | 28.246 | 0.006667591 | 0.017379293 | 2.61 | 0.021 |
| 488 | 1267BK12#2309#L-ascorbic      | 464 | 28.246 | 0.001097651 | 0.001674209 | 1.53 | 0.407 |
| 489 | 1267BK12#2320#D-isoascorbic   | 332 | 28.348 | 0.001078705 | 0.001541512 | 1.43 | 0.066 |
| 490 | 1267BK12#2320#D-isoascorbic   | 332 | 28.348 | 0.001078705 | 0.001541512 | 1.43 | 0.066 |
| 491 | 1267BK12#2320#D-isoascorbic   | 449 | 28.348 | 0.009806167 | 0.011312475 | 1.15 | 0.792 |
| 492 | 1267BK12#2320#D-isoascorbic   | 449 | 28.348 | 0.009806167 | 0.011993871 | 1.22 | 0.716 |
| 493 | 1267BK12#2320#D-isoascorbic   | 464 | 28.348 | 0.000619510 | 0.000913805 | 1.48 | 0.581 |
| 494 | 1267BK12#2320#D-isoascorbic   | 464 | 28.348 | 0.000619510 | 0.001348338 | 2.18 | 0.210 |
| 495 | 1267BK12#2320#D-isoascorbic   | 332 | 28.348 | 0.000914985 | 0.001541512 | 1.68 | 0.022 |
| 496 | 1267BK12#2320#D-isoascorbic   | 464 | 28.348 | 0.002044846 | 0.001348338 | 0.66 | 0.662 |
| 497 | 1267BK12#2325                 | 299 | 28.396 | 0.019378615 | 0.021158000 | 1.09 | 0.722 |
| 498 | 1267BK12#2336                 | 420 | 28.496 | 0.000896468 | 0.000649187 | 0.72 | 0.128 |
| 499 | 1267BK12#2336                 | 330 | 28.496 | 0.000445277 | 0.000401655 | 0.90 | 0.750 |
| 500 | 1267BK12#2341                 | 420 | 28.550 | 0.000776189 | 0.000649187 | 0.84 | 0.550 |
| 501 | 1267BK12#2354                 | 394 | 28.668 | 0.000081954 | 0.000089694 | 1.09 | 0.865 |
| 502 | 1267BK12#2364#c-caffeic       | 219 | 28.750 | 0.001317395 | 0.001040599 | 0.79 | 0.507 |



|     |                              |     |        |             |             |       |       |
|-----|------------------------------|-----|--------|-------------|-------------|-------|-------|
| 503 | 1267BK12#2364#c-caffeic      | 396 | 28.750 | 0.000058095 | 0.000060460 | 1.04  | 0.907 |
| 504 | 1267BK12#2364#c-caffeic      | 381 | 28.750 | 0.000100768 | 0.000091835 | 0.91  | 0.654 |
| 505 | 1267BK12#2370                | 204 | 28.806 | 0.035885064 | 0.061304501 | 1.71  | 0.378 |
| 506 | 1267BK12#2384                | 332 | 28.942 | 0.002097548 | 0.002586554 | 1.23  | 0.281 |
| 507 | 1267BK12#2384                | 190 | 28.942 | 0.003922825 | 0.003234960 | 0.82  | 0.736 |
| 508 | 1267BK12#2396                | 447 | 29.051 | 0.011876612 | 0.016644446 | 1.40  | 0.023 |
| 509 | 1267BK12#2401                | 190 | 29.079 | 0.001164654 | 0.001052896 | 0.90  | 0.731 |
| 510 | 1267BK12#2401                | 230 | 29.079 | 0.002892366 | 0.001245016 | 0.43  | 0.402 |
| 511 | 1267BK12#2412                | 206 | 29.188 | 0.008272871 | 0.007267453 | 0.88  | 0.242 |
| 512 | 1267BK12#2412                | 116 | 29.188 | 0.005359826 | 0.005362373 | 1.00  | 0.998 |
| 513 | 1267BK12#2436                | 174 | 29.406 | 0.015449077 | 0.028257325 | 1.83  | 0.048 |
| 514 | 1267BK12#2455                | 319 | 29.578 | 0.270056562 | 0.434070671 | 1.61  | 0.079 |
| 515 | 1267BK12#2463                | 373 | 29.652 | 0.072538929 | 0.000553362 | 0.01  | 0.372 |
| 516 | 1267BK12#2476#16:0           | 313 | 29.770 | 0.058936000 | 0.057600052 | 0.98  | 0.953 |
| 517 | 1267BK12#2483                | 360 | 29.833 | 0.010441455 | 0.000451290 | 0.04  | 0.376 |
| 518 | 1267BK12#2512                | 484 | 30.097 | 0.000156888 | 0.000102575 | 0.65  | 0.582 |
| 519 | 1267BK12#2527#dopamine       | 174 | 30.234 | 0.000924843 | 0.001829657 | 1.98  | 0.088 |
| 520 | 1267BK12#2527#dopamine       | 426 | 30.234 | 0.000046393 | 0.000021623 | 0.47  | 0.176 |
| 521 | 1267BK12#2537                | 288 | 30.326 | 0.000726501 | 0.000473710 | 0.65  | 0.487 |
| 522 | 1267BK12#2548#myo-ino        | 507 | 30.426 | 0.190160539 | 0.037694703 | 0.20  | 0.405 |
| 523 | 1267BK12#2548#myo-ino        | 305 | 30.426 | 0.676854039 | 1.197512045 | 1.77  | 0.037 |
| 524 | 1267BK12#2559                | 262 | 30.527 | 0.035829718 | 0.001731751 | 0.05  | 0.382 |
| 525 | 1267BK12#2559                | 205 | 30.527 | 0.096617812 | 0.127679416 | 1.32  | 0.647 |
| 526 | 1267BK12#2560#t-ferulic      | 338 | 30.536 | 0.000586928 | 0.000781185 | 1.33  | 0.287 |
| 527 | 1267BK12#2560#t-ferulic      | 249 | 30.536 | 0.000527105 | 0.000585541 | 1.11  | 0.644 |
| 528 | 1267BK12#2560#t-ferulic      | 323 | 30.536 | 0.000794243 | 0.000460781 | 0.58  | 0.232 |
| 529 | 1267BK12#2584                | 373 | 30.756 | 0.001266813 | 0.006870272 | 5.42  | 0.002 |
| 530 | 1267BK12#2589                | 319 | 30.784 | 0.019501878 | 0.019849936 | 1.02  | 0.945 |
| 531 | 1267BK12#2609                | 319 | 30.975 | 0.009789161 | 0.013846089 | 1.41  | 0.111 |
| 532 | 1267BK12#2620                | 352 | 31.102 | 0.002367569 | 0.000130198 | 0.05  | 0.385 |
| 533 | 1267BK12#2633#t-caffeic      | 396 | 31.194 | 0.000397113 | 0.000358401 | 0.90  | 0.755 |
| 534 | 1267BK12#2633#t-caffeic      | 219 | 31.194 | 0.000821375 | 0.001195545 | 1.46  | 0.165 |
| 535 | 1267BK12#2633#t-caffeic      | 381 | 31.194 | 0.002987921 | 0.000126815 | 0.04  | 0.380 |
| 536 | 1267BK12#2639                | 319 | 31.258 | 0.011667592 | 0.017494566 | 1.50  | 0.126 |
| 537 | 1267BK12#2660#noradrenalin 5 | 174 | 31.449 | 0.002758396 | 0.006800006 | 2.47  | 0.008 |
| 538 | 1267BK12#2685                | 364 | 31.686 | 0.000740066 | 0.000704044 | 0.95  | 0.588 |
| 539 | 1267BK12#2685                | 230 | 31.686 | 0.000795667 | 0.000898207 | 1.13  | 0.591 |
| 540 | 1267BK12#2715                | 249 | 31.950 | 0.019692668 | 0.006906872 | 0.35  | 0.403 |
| 541 | 1267BK12#2715                | 204 | 31.950 | 0.044478635 | 0.055386793 | 1.25  | 0.553 |
| 542 | 1267BK12#2723                | 218 | 32.024 | 0.002908780 | 0.001619552 | 0.56  | 0.157 |
| 543 | 1267BK12#2723                | 235 | 32.024 | 0.002492764 | 0.002767415 | 1.11  | 0.819 |
| 544 | 1267BK12#2734#docosane       | 85  | 32.126 | 2.988570509 | 2.749676592 | 0.92  | 0.219 |
| 545 | 1267BK12#2738                | 357 | 32.166 | 0.000076221 | 0.001235474 | 16.21 | 0.041 |
| 546 | 1267BK12#2738                | 445 | 32.166 | 0.000797933 | 0.000414239 | 0.52  | 0.629 |
| 547 | 1267BK12#2742#tryptophan 2   | 202 | 32.204 | 0.000841219 | 0.006569999 | 7.81  | 0.005 |
| 548 | 1267BK12#2742#tryptophan 2   | 391 | 32.204 | 0.000099948 | 0.000358518 | 3.59  | 0.005 |
| 549 | 1267BK12#2742#tryptophan 2   | 278 | 32.204 | 0.000163467 | 0.000556308 | 3.40  | 0.000 |
| 550 | 1267BK12#2758#tryptophan 3   | 202 | 32.350 | 0.002545284 | 0.072053388 | 28.31 | 0.002 |
| 551 | 1267BK12#2758#tryptophan 3   | 291 | 32.350 | 0.000598433 | 0.007559066 | 12.63 | 0.003 |
| 552 | 1267BK12#2758#tryptophan 3   | 200 | 32.350 | 0.000462898 | 0.002136190 | 4.61  | 0.001 |
| 553 | 1267BK12#2801#18:0           | 341 | 32.742 | 0.057740001 | 0.056005121 | 0.97  | 0.942 |
| 554 | 1267BK12#2809#t-sinapic      | 368 | 32.815 | 0.033995641 | 0.046041875 | 1.35  | 0.037 |
| 555 | 1267BK12#2809#t-sinapic      | 338 | 32.815 | 0.031584949 | 0.047525519 | 1.50  | 0.036 |
| 556 | 1267BK12#2809#t-sinapic      | 353 | 32.815 | 0.014320971 | 0.024541805 | 1.71  | 0.063 |
| 557 | 1267BK12#2822                | 159 | 32.933 | 0.012995220 | 0.012564786 | 0.97  | 0.899 |
| 558 | 1267BK12#2822                | 286 | 32.933 | 0.002084416 | 0.002272444 | 1.09  | 0.623 |
| 559 | 1267BK12#2859                | 290 | 33.272 | 0.007899627 | 0.013128120 | 1.66  | 0.009 |
| 560 | 1267BK12#2859                | 319 | 33.272 | 0.003980695 | 0.007205197 | 1.81  | 0.036 |
| 561 | 1267BK12#2881                | 263 | 33.472 | 0.000318525 | 0.000354232 | 1.11  | 0.732 |
| 562 | 1267BK12#2881                | 259 | 33.472 | 0.002126885 | 0.000046969 | 0.02  | 0.363 |
| 563 | 1267BK12#2907                | 328 | 33.719 | 0.005346543 | 0.006566294 | 1.23  | 0.607 |
| 564 | 1267BK12#2908#fru-6-P MX     | 315 | 33.718 | 0.005468757 | 0.010808577 | 1.98  | 0.020 |
| 565 | 1267BK12#2908#fru-6-P MX     | 260 | 33.718 | 0.000617307 | 0.000778562 | 1.26  | 0.410 |

|     |                             |     |        |             |             |      |       |
|-----|-----------------------------|-----|--------|-------------|-------------|------|-------|
| 566 | 1267BK12#2921               | 173 | 33.820 | 0.004765415 | 0.000374553 | 0.08 | 0.357 |
| 567 | 1267BK12#2926#glc-6-P MX1   | 387 | 33.892 | 0.019456748 | 0.036602246 | 1.88 | 0.015 |
| 568 | 1267BK12#2944               | 277 | 34.057 | 0.000749996 | 0.000105093 | 0.14 | 0.389 |
| 569 | 1267BK12#2944               | 204 | 34.057 | 0.008292245 | 0.003285779 | 0.40 | 0.390 |
| 570 | 1267BK12#2953#glc-6-P MX2   | 387 | 34.131 | 0.004447275 | 0.006755767 | 1.52 | 0.025 |
| 571 | 1267BK12#2958               | 417 | 34.177 | 0.000275914 | 0.000703134 | 2.55 | 0.015 |
| 572 | 1267BK12#2958               | 489 | 34.177 | 0.001177252 | 0.000268150 | 0.23 | 0.434 |
| 573 | 1267BK12#2975               | 331 | 34.332 | 0.002976481 | 0.003429255 | 1.15 | 0.234 |
| 574 | 1267BK12#2975               | 204 | 34.332 | 0.001801828 | 0.001919881 | 1.07 | 0.864 |
| 575 | 1267BK12#2975               | 172 | 34.332 | 0.000408830 | 0.000495183 | 1.21 | 0.576 |
| 576 | 1267BK12#2980               | 331 | 34.379 | 0.002676398 | 0.003429255 | 1.28 | 0.126 |
| 577 | 1267BK12#2980               | 262 | 34.379 | 0.001582384 | 0.001583243 | 1.00 | 0.994 |
| 578 | 1267BK12#2980               | 421 | 34.379 | 0.001539288 | 0.001306513 | 0.85 | 0.611 |
| 579 | 1267BK12#3007               | 351 | 34.626 | 0.003881779 | 0.000133983 | 0.03 | 0.374 |
| 580 | 1267BK12#3007               | 204 | 34.626 | 0.014280104 | 0.009139038 | 0.64 | 0.261 |
| 581 | 1267BK12#3014               | 292 | 34.690 | 0.008790244 | 0.003147997 | 0.36 | 0.164 |
| 582 | 1267BK12#3014               | 204 | 34.690 | 0.016189840 | 0.011021194 | 0.68 | 0.335 |
| 583 | 1267BK12#3034               | 91  | 34.872 | 0.003337990 | 0.002777084 | 0.83 | 0.261 |
| 584 | 1267BK12#3034               | 204 | 34.872 | 0.004044196 | 0.004640256 | 1.15 | 0.612 |
| 585 | 1267BK12#3058               | 356 | 35.138 | 0.001118689 | 0.001700232 | 1.52 | 0.296 |
| 586 | 1267BK12#3058               | 262 | 35.138 | 0.001017296 | 0.000833921 | 0.82 | 0.700 |
| 587 | 1267BK12#3061#myo-ino-2-P 1 | 318 | 35.131 | 0.001717883 | 0.003399704 | 1.98 | 0.012 |
| 588 | 1267BK12#3081               | 159 | 35.302 | 0.000239432 | 0.000345974 | 1.44 | 0.390 |
| 589 | 1267BK12#3097               | 245 | 35.458 | 0.000406771 | 0.000618640 | 1.52 | 0.107 |
| 590 | 1267BK12#3097               | 360 | 35.458 | 0.000187484 | 0.000482610 | 2.57 | 0.003 |
| 591 | 1267BK12#3118               | 430 | 35.642 | 0.000430217 | 0.000860891 | 2.00 | 0.036 |
| 592 | 1267BK12#3118               | 360 | 35.642 | 0.003944140 | 0.000804788 | 0.20 | 0.426 |
| 593 | 1267BK12#3179               | 204 | 36.200 | 0.006788903 | 0.004996245 | 0.74 | 0.361 |
| 594 | 1267BK12#3179               | 247 | 36.200 | 0.000090492 | 0.000150751 | 1.67 | 0.072 |
| 595 | 1267BK12#3189               | 105 | 36.292 | 0.000744912 | 0.000460455 | 0.62 | 0.160 |
| 596 | 1267BK12#3189               | 356 | 36.292 | 0.000595667 | 0.001263731 | 2.12 | 0.128 |
| 597 | 1267BK12#3189               | 223 | 36.292 | 0.000319125 | 0.000200101 | 0.63 | 0.100 |
| 598 | 1267BK12#3203               | 321 | 36.419 | 0.023858107 | 0.009279657 | 0.39 | 0.301 |
| 599 | 1267BK12#3203               | 204 | 36.419 | 0.057589540 | 0.053850759 | 0.94 | 0.806 |
| 600 | 1267BK12#3203               | 361 | 36.419 | 0.003555856 | 0.003293595 | 0.93 | 0.802 |
| 601 | 1267BK12#3258               | 219 | 36.923 | 0.005660150 | 0.004616803 | 0.82 | 0.522 |
| 602 | 1267BK12#3278               | 290 | 37.107 | 0.000052667 | 0.000099220 | 1.88 | 0.124 |
| 603 | 1267BK12#3283               | 304 | 37.144 | 0.000062265 | 0.000074472 | 1.20 | 0.577 |
| 604 | 1267BK12#3283               | 175 | 37.144 | 0.000149430 | 0.000308921 | 2.07 | 0.190 |
| 605 | 1267BK12#3302               | 361 | 37.336 | 0.014169437 | 0.019912726 | 1.41 | 0.213 |
| 606 | 1267BK12#3302               | 267 | 37.336 | 0.000890397 | 0.000087729 | 0.10 | 0.359 |
| 607 | 1267BK12#3317               | 254 | 37.465 | 0.000190022 | 0.000239807 | 1.26 | 0.244 |
| 608 | 1267BK12#3323               | 535 | 37.520 | 0.000079910 | 0.000058909 | 0.74 | 0.638 |
| 609 | 1267BK12#3382#sucrose       | 437 | 38.090 | 0.707323013 | 0.704598709 | 1.00 | 0.989 |
| 610 | 1267BK12#3386#sucrose       | 451 | 38.099 | 0.454666665 | 0.285459934 | 0.63 | 0.170 |
| 611 | 1267BK12#3391               | 423 | 38.169 | 0.072777895 | 0.002667424 | 0.04 | 0.371 |
| 612 | 1267BK12#3431               | 204 | 38.510 | 0.014193022 | 0.019426987 | 1.37 | 0.301 |
| 613 | 1267BK12#3467               | 450 | 38.859 | 0.000325858 | 0.000172516 | 0.53 | 0.492 |
| 614 | 1267BK12#3487               | 204 | 39.034 | 0.018307667 | 0.015917983 | 0.87 | 0.119 |
| 615 | 1267BK12#3515#maltose MX1   | 204 | 39.300 | 0.012840721 | 0.009238796 | 0.72 | 0.338 |
| 616 | 1267BK12#3515#maltose MX1   | 160 | 39.300 | 0.001516901 | 0.001352469 | 0.89 | 0.696 |
| 617 | 1267BK12#3522#trehalose     | 191 | 39.356 | 0.005637575 | 0.007736227 | 1.37 | 0.111 |
| 618 | 1267BK12#3559               | 193 | 39.695 | 0.000780769 | 0.001336496 | 1.71 | 0.094 |
| 619 | 1267BK12#3586               | 105 | 39.944 | 0.117649697 | 0.100119919 | 0.85 | 0.078 |
| 620 | 1267BK12#3586               | 179 | 39.944 | 0.127918479 | 0.146985464 | 1.15 | 0.601 |
| 621 | 1267BK12#3594#octacosane    | 85  | 40.018 | 2.688674546 | 2.388284304 | 0.89 | 0.175 |
| 622 | 1267BK12#3622               | 277 | 40.279 | 0.018772476 | 0.000089528 | 0.00 | 0.374 |
| 623 | 1267BK12#3633               | 450 | 40.380 | 0.000155062 | 0.000168934 | 1.09 | 0.781 |
| 624 | 1267BK12#3668               | 345 | 40.730 | 0.000098891 | 0.000116407 | 1.18 | 0.751 |
| 625 | 1267BK12#3668               | 175 | 40.730 | 0.000135349 | 0.000151552 | 1.12 | 0.819 |
| 626 | 1267BK12#3674               | 312 | 40.766 | 0.000150697 | 0.000042992 | 0.29 | 0.395 |
| 627 | 1267BK12#3674               | 219 | 40.766 | 0.000574371 | 0.000689210 | 1.20 | 0.388 |
| 628 | 1267BK12#3721               | 280 | 41.199 | 0.000058463 | 0.000085009 | 1.45 | 0.224 |

|     |                                |     |        |             |             |        |       |
|-----|--------------------------------|-----|--------|-------------|-------------|--------|-------|
| 629 | 1267BK12#3768                  | 191 | 41.631 | 0.001378206 | 0.000792769 | 0.58   | 0.128 |
| 630 | 1267BK12#3768                  | 204 | 41.631 | 0.001315542 | 0.000685981 | 0.52   | 0.134 |
| 631 | 1267BK12#3775                  | 289 | 41.688 | 0.000115011 | 0.000093529 | 0.81   | 0.760 |
| 632 | 1267BK12#3802                  | 345 | 41.945 | 0.000067967 | 0.000089063 | 1.31   | 0.408 |
| 633 | 1267BK12#3802                  | 249 | 41.945 | 0.000113732 | 0.000098246 | 0.86   | 0.694 |
| 634 | 1267BK12#3821                  | 249 | 42.130 | 0.000762455 | 0.000137894 | 0.18   | 0.379 |
| 635 | 1267BK12#3827                  | 204 | 42.167 | 0.002206894 | 0.013907893 | 6.30   | 0.000 |
| 636 | 1267BK12#3827                  | 191 | 42.167 | 0.000450546 | 0.003306922 | 7.34   | 0.000 |
| 637 | 1267BK12#3827                  | 433 | 42.167 | 0.000053104 | 0.000585761 | 11.03  | 0.000 |
| 638 | 1267BK12#3841#3-c-caffeoquinic | 345 | 42.296 | 0.000268252 | 0.000096704 | 0.36   | 0.455 |
| 639 | 1267BK12#3841#3-c-caffeoquinic | 255 | 42.296 | 0.000326241 | 0.000106001 | 0.32   | 0.194 |
| 640 | 1267BK12#3856                  | 204 | 42.434 | 0.207214035 | 0.192831101 | 0.93   | 0.380 |
| 641 | 1267BK12#3856                  | 433 | 42.434 | 0.005458492 | 0.005187804 | 0.95   | 0.576 |
| 642 | 1267BK12#3856                  | 191 | 42.434 | 0.038273149 | 0.035466404 | 0.93   | 0.358 |
| 643 | 1267BK12#3858#5-c-caffeoquinic | 345 | 42.462 | 0.001038584 | 0.000918228 | 0.88   | 0.170 |
| 644 | 1267BK12#3858#5-c-caffeoquinic | 447 | 42.453 | 0.000021741 | 0.000018761 | 0.86   | 0.515 |
| 645 | 1267BK12#3865#4-c-caffeoquinic | 307 | 42.517 | 0.001077570 | 0.001006959 | 0.93   | 0.298 |
| 646 | 1267BK12#3865#4-c-caffeoquinic | 489 | 42.517 | 0.000036472 | 0.000055851 | 1.53   | 0.080 |
| 647 | 1267BK12#3930                  | 396 | 43.127 | 0.000027744 | 0.000034202 | 1.23   | 0.394 |
| 648 | 1267BK12#3930                  | 219 | 43.127 | 0.000506520 | 0.001425005 | 2.81   | 0.000 |
| 649 | 1267BK12#3954                  | 396 | 43.339 | 0.000021589 | 0.000026294 | 1.22   | 0.534 |
| 650 | 1267BK12#3954                  | 219 | 43.339 | 0.000781645 | 0.000119706 | 0.15   | 0.026 |
| 651 | 1267BK12#3963                  | 345 | 43.431 | 0.000078765 | 0.000049279 | 0.63   | 0.221 |
| 652 | 1267BK12#3963                  | 396 | 43.431 | 0.000015917 | 0.000018009 | 1.13   | 0.619 |
| 653 | 1267BK12#3987#3-t-caffeoquinic | 345 | 43.644 | 0.000120824 | 0.000053817 | 0.45   | 0.323 |
| 654 | 1267BK12#3987#3-t-caffeoquinic | 255 | 43.644 | 0.000088092 | 0.000075041 | 0.85   | 0.609 |
| 655 | 1267BK12#3996                  | 204 | 43.730 | 0.023075973 | 0.046575578 | 2.02   | 0.003 |
| 656 | 1267BK12#3996                  | 363 | 43.730 | 0.002976478 | 0.000752446 | 0.25   | 0.023 |
| 657 | 1267BK12#4004                  | 597 | 43.806 | 0.000724371 | 0.002156674 | 2.98   | 0.002 |
| 658 | 1267BK12#4045                  | 249 | 44.176 | 0.000226893 | 0.000130005 | 0.57   | 0.134 |
| 659 | 1267BK12#4045                  | 255 | 44.176 | 0.000133049 | 0.000070684 | 0.53   | 0.067 |
| 660 | 1267BK12#4062#4-t-caffeoquinic | 307 | 44.343 | 0.000112155 | 0.000063384 | 0.57   | 0.358 |
| 661 | 1267BK12#4062#4-t-caffeoquinic | 489 | 44.343 | 0.000049595 | 0.000036656 | 0.74   | 0.204 |
| 662 | 1267BK12#4075#dotriacontane    | 85  | 44.468 | 2.532627965 | 2.286235615 | 0.90   | 0.201 |
| 663 | 1267BK12#4085#5-t-caffeoquinic | 307 | 44.565 | 0.000060203 | 0.000088804 | 1.48   | 0.202 |
| 664 | 1267BK12#4085#5-t-caffeoquinic | 447 | 44.565 | 0.000023452 | 0.000021312 | 0.91   | 0.758 |
| 665 | 1267BK12#4096                  | 204 | 44.658 | 0.001339846 | 0.000340724 | 0.25   | 0.012 |
| 666 | 1267BK12#4096                  | 345 | 44.658 | 0.000079144 | 0.000056892 | 0.72   | 0.388 |
| 667 | 1267BK12#4175                  | 279 | 45.399 | 0.000516443 | 0.000425862 | 0.82   | 0.587 |
| 668 | 1267BK12#4175                  | 255 | 45.399 | 0.000073639 | 0.000084426 | 1.15   | 0.599 |
| 669 | 1267BK12#4278                  | 361 | 46.352 | 0.000106311 | 0.015185925 | 142.84 | 0.019 |
| 670 | 1267BK12#4278                  | 450 | 46.352 | 0.000036682 | 0.000141131 | 3.85   | 0.089 |
| 671 | 1267BK12#4278                  | 319 | 46.352 | 0.000078517 | 0.000457974 | 5.83   | 0.037 |
| 672 | 1267BK12#4302                  | 441 | 46.585 | 0.015792176 | 0.025260374 | 1.60   | 0.060 |
| 673 | 1267BK12#4500#hexatriacontane  | 85  | 48.418 | 2.291395897 | 2.053853300 | 0.90   | 0.236 |
| 674 | 1267BK14#3416                  | 204 | 38.418 | 0.019024429 | 0.023172930 | 1.22   | 0.149 |
| 675 | 1267BK14#3416                  | 217 | 38.418 | 0.010380712 | 0.011480201 | 1.11   | 0.680 |
| 676 | 1267BK14#3416                  | 451 | 38.418 | 0.002222047 | 0.000419403 | 0.19   | 0.332 |
| 677 | 1267BK14#3416                  | 361 | 38.418 | 0.007632586 | 0.007380607 | 0.97   | 0.869 |
| 678 | 1267BK38#3430                  | 204 | 38.538 | 0.004180014 | 0.009547565 | 2.28   | 0.003 |
| 679 | 1267BK38#3430                  | 361 | 38.538 | 0.001482732 | 0.001028252 | 0.69   | 0.759 |
| 680 | 1267BK38#3430                  | 423 | 38.538 | 0.000245671 | 0.000355282 | 1.45   | 0.111 |
| 681 | 1267BK38#3466                  | 361 | 38.873 | 0.011396699 | 0.005817984 | 0.51   | 0.410 |
| 682 | 1267BK38#3466                  | 423 | 38.873 | 0.008930515 | 0.000041278 | 0.00   | 0.374 |
| 683 | 1267BK38#3466                  | 217 | 38.873 | 0.027173611 | 0.011903048 | 0.44   | 0.153 |
| 684 | 1267BK38#4348                  | 259 | 47.146 | 0.000067496 | 0.000065731 | 0.97   | 0.902 |
| 685 | 1267BK38#4348                  | 217 | 47.146 | 0.000126686 | 0.000172123 | 1.36   | 0.246 |
| 686 | 1267BK38#4348                  | 349 | 47.146 | 0.000026426 | 0.000030070 | 1.14   | 0.399 |
| 687 | 1267BK38#4360                  | 361 | 47.254 | 0.000078360 | 0.000107724 | 1.37   | 0.527 |
| 688 | 1267BK38#4360                  | 204 | 47.254 | 0.000155013 | 0.000165537 | 1.07   | 0.828 |
| 689 | 1267BK38#4360                  | 271 | 47.254 | 0.000091825 | 0.000072861 | 0.79   | 0.350 |
| 690 | 1283BV06#2056#glyceric-3-P     | 357 | 25.932 | 0.003303666 | 0.002493723 | 0.75   | 0.217 |
| 691 | 1286BU03#0764#norvaline 2      | 144 | 14.409 | 0.000776056 | 0.000758201 | 0.98   | 0.967 |

|     |                                |         |        |             |             |             |              |
|-----|--------------------------------|---------|--------|-------------|-------------|-------------|--------------|
| 692 | 1286BU03#0764#norvaline 2      | 218     | 14.409 | 0.002994663 | 0.000050684 | 0.02        | 0.337        |
| 693 | 1286BU04#2069#isocitric        | 245     | 26.178 | 0.011023847 | 0.004139450 | 0.38        | 0.442        |
| 694 | 1286BU04#2069#isocitric        | 375     | 26.178 | 0.045677094 | 0.065520448 | <b>1.43</b> | <b>0.015</b> |
| 695 | 1286BU07#2401#saccharic        | 292     | 29.206 | 0.001856459 | 0.002986697 | 1.61        | 0.055        |
| 696 | 1286BU08#2094                  | 160     | 26.428 | 0.015363362 | 0.017988020 | 1.17        | 0.526        |
| 697 | 1286BU08#2094                  | 334     | 26.428 | 0.000613109 | 0.000383070 | 0.62        | 0.499        |
| 698 | 1286BU08#2094                  | 189     | 26.428 | 0.003108709 | 0.004261480 | 1.37        | 0.281        |
| 699 | 1286BU08#2283#galacturonic MX1 | 160     | 28.162 | 0.005065982 | 0.007424653 | 1.47        | 0.116        |
| 700 | 1286BU08#2314#galacturonic MX2 | 160     | 28.449 | 0.004637810 | 0.005324866 | 1.15        | 0.783        |
| 701 | 1286BU10#2380#gluconic         | 333     | 29.046 | 0.012883135 | 0.010036760 | 0.78        | 0.478        |
| 702 | 1286BU10#2380#gluconic         | 292     | 29.046 | 0.021126290 | 0.027048260 | 1.28        | 0.323        |
| 703 | 1286BU10#2380#gluconic         | 423     | 29.046 | 0.000953474 | 0.000582131 | 0.61        | 0.344        |
| 704 | 1286BU10#2380#gluconic         | 433     | 29.046 | 0.032337713 | 0.002398871 | 0.07        | 0.374        |
| 705 | 1286BU13#1452#g-aminobutyric 3 | 174     | 20.640 | 0.154535274 | 0.468362273 | <b>3.03</b> | <b>0.001</b> |
| 706 | 1286BU13#1452#g-aminobutyric 3 | 304     | 20.640 | 0.122611446 | 0.090641544 | 0.74        | 0.733        |
| 707 | 1310BK02#3728#d-tocopherol     | 474+475 | 41.175 | 0.000071257 | 0.000048070 | 0.67        | 0.392        |
| 708 | 1310BK02#3728#d-tocopherol     | 208     | 41.175 | 0.000718338 | 0.000111235 | 0.15        | 0.335        |
| 709 | 1310BK02#3834#b-tocopherol     | 488+489 | 42.144 | 0.000056334 | 0.000042452 | 0.75        | 0.433        |
| 710 | 1310BK02#3834#b-tocopherol     | 223     | 42.144 | 0.000091491 | 0.000134862 | 1.47        | 0.366        |
| 711 | 1310BK02#3848#g-tocopherol     | 488+489 | 42.273 | 0.000041723 | 0.000031167 | 0.75        | 0.525        |
| 712 | 1310BK02#3848#g-tocopherol     | 223     | 42.273 | 0.000094706 | 0.000136000 | 1.44        | 0.527        |
| 713 | 1310BK02#4014#a-tocopherol     | 502+503 | 43.815 | 0.000036101 | 0.000065742 | 1.82        | 0.084        |
| 714 | 1310BK02#4014#a-tocopherol     | 237     | 43.815 | 0.000081275 | 0.000078463 | 0.97        | 0.910        |
| 715 | 1310BK02#4065#a-tocopherolacet | 430     | 44.291 | 0.000067046 | 0.000072489 | 1.08        | 0.735        |
| 716 | 1310BK02#4065#a-tocopherolacet | 165     | 44.291 | 0.000153339 | 0.000086932 | 0.57        | 0.130        |
| 717 | 1323AU19#2803#myo-ino-1-P 1    | 299     | 35.149 | 0.001404904 | 0.001835061 | 1.31        | 0.129        |
| 718 | 1323AU19#2803#myo-ino-1-P 1    | 318     | 35.149 | 0.001717883 | 0.003390794 | <b>1.97</b> | <b>0.012</b> |
| 719 | 1323AU19#2803#myo-ino-1-P 1    | 387     | 35.149 | 0.000821670 | 0.000983360 | 1.20        | 0.571        |
| 720 | 1323AU19#2897#myo-ino-1-P 2    | 318     | 35.928 | 0.000140738 | 0.000291931 | <b>2.07</b> | <b>0.016</b> |
| 721 | 1323AU19#2897#myo-ino-1-P 2    | 387     | 35.928 | 0.000045778 | 0.000162294 | <b>3.55</b> | <b>0.005</b> |
| 722 | 1323AU19#2897#myo-ino-1-P 2    | 494     | 35.928 | 0.000032094 | 0.000039450 | 1.23        | 0.521        |
| 723 | 1323AU30#3400#isomaltose       | 361     | 40.963 | 0.002256894 | 0.003436885 | <b>1.52</b> | <b>0.035</b> |
| 724 | 1323AU30#3400#isomaltose       | 160     | 40.963 | 0.000716158 | 0.001324768 | <b>1.85</b> | <b>0.018</b> |
| 725 | 1323AU30#3400#isomaltose       | 480     | 40.963 | 0.000103175 | 0.000171034 | <b>1.66</b> | <b>0.033</b> |
| 726 | 1323AU39#2079#ononitol         | 265     | 28.275 | 0.001008599 | 0.000385601 | 0.38        | 0.165        |
| 727 | 1323AU39#2079#ononitol         | 318     | 28.275 | 0.002583687 | 0.001887231 | 0.73        | 0.635        |
| 728 | 1323AU39#2079#ononitol         | 507     | 28.275 | 0.000183272 | 0.000173932 | 0.95        | 0.928        |
| 729 | 1324BK14#2728#glc-6-P MX1      | 160     | 33.886 | 0.010336547 | 0.015794326 | <b>1.53</b> | <b>0.033</b> |
| 730 | 1324BK14#2752#glc-6-P MX2      | 299     | 34.122 | 0.004335148 | 0.007068364 | 1.63        | 0.051        |
| 731 | 1324BK14#2752#glc-6-P MX2      | 471     | 34.122 | 0.001458633 | 0.000704522 | 0.48        | 0.483        |
| 732 | 1324BK16#2662#fru-6-P MX       | 459     | 33.716 | 0.000563140 | 0.001207358 | <b>2.14</b> | <b>0.018</b> |
| 733 | 1324BK20#2928#gluconic-6-P     | 299     | 35.281 | 0.000061750 | 0.000108313 | 1.75        | 0.060        |
| 734 | 1324BK20#2928#gluconic-6-P     | 387     | 35.281 | 0.000373540 | 0.000280107 | 0.75        | 0.801        |
| 735 | 1324BK22#2721#man-6-P MX1      | 387     | 33.720 | 0.003342773 | 0.004464207 | 1.34        | 0.124        |
| 736 | 1324BK22#2721#man-6-P MX1      | 160     | 33.720 | 0.003312678 | 0.002862725 | 0.86        | 0.706        |
| 737 | 1324BK22#2739#man-6-P MX2      | 387     | 33.893 | 0.022712380 | 0.036602246 | <b>1.61</b> | <b>0.035</b> |
| 738 | 1324BK23#1767#glyceral-3-P MX1 | 384     | 24.156 | 0.000065776 | 0.000026262 | 0.40        | 0.235        |
| 739 | 1324BK23#1767#glyceral-3-P MX1 | 299     | 24.156 | 0.000154489 | 0.000235355 | 1.52        | 0.432        |
| 740 | 1324BK23#1792#glyceral-3-P MX2 | 328     | 24.394 | 0.000319791 | 0.000642533 | 2.01        | 0.142        |
| 741 | 1324BK23#1792#glyceral-3-P MX2 | 299     | 24.395 | 0.003018048 | 0.000405445 | 0.13        | 0.419        |
| 742 | 1324BK24#1877#glycerol-1-P     | 357     | 25.120 | 0.002312621 | 0.007029739 | <b>3.04</b> | <b>0.001</b> |
| 743 | 1324BK24#1877#glycerol-1-P     | 299     | 25.120 | 0.003228249 | 0.009106057 | <b>2.82</b> | <b>0.000</b> |
| 744 | 1324BK31#2823#myo-ino-2-P 1    | 387     | 35.131 | 0.000502303 | 0.000983360 | <b>1.96</b> | <b>0.027</b> |
| 745 | 1324BK31#2898#myo-ino-2-P 2    | 387     | 35.873 | 0.000087292 | 0.000169900 | <b>1.95</b> | <b>0.008</b> |
| 746 | 1324BK31#2898#myo-ino-2-P 2    | 318     | 35.873 | 0.000214289 | 0.000307703 | 1.44        | 0.274        |
| 747 | 1325BK16#0403#d4-alanine 2     | 120     | 11.028 | 0.009086680 | 0.012372307 | 1.36        | 0.525        |
| 748 | 1325BK16#0914#g-aminobutyric 2 | 102     | 15.830 | 0.003166852 | 0.009663864 | <b>3.05</b> | <b>0.004</b> |
| 749 | 1325BK16#0914#g-aminobutyric 2 | 232     | 15.830 | 0.001525804 | 0.001634220 | 1.07        | 0.924        |
| 750 | 1325BK16#1034                  | 266     | 16.936 | 0.818222953 | 0.387714088 | 0.47        | 0.423        |
| 751 | 1325BK16#1034                  | 192     | 16.936 | 1.644136951 | 2.221892178 | 1.35        | 0.470        |
| 752 | 1325BK16#1302                  | 338     | 19.407 | 0.080647563 | 0.028342795 | 0.35        | 0.446        |
| 753 | 1325BK16#1302                  | 236     | 19.407 | 0.154210559 | 0.282767075 | 1.83        | 0.212        |
| 754 | 1325BK16#1308                  | 232     | 19.462 | 0.009112329 | 0.016105997 | 1.77        | 0.130        |

|     |                      |     |        |             |             |       |       |
|-----|----------------------|-----|--------|-------------|-------------|-------|-------|
| 755 | 1325BK16#1403        | 283 | 20.347 | 0.005456738 | 0.003376160 | 0.62  | 0.353 |
| 756 | 1325BK16#1537        | 247 | 21.624 | 0.001164603 | 0.002346979 | 2.02  | 0.005 |
| 757 | 1325BK16#1537        | 349 | 21.624 | 0.000503974 | 0.000496982 | 0.99  | 0.973 |
| 758 | 1325BK16#1546        | 306 | 21.692 | 0.005903918 | 0.004728573 | 0.80  | 0.381 |
| 759 | 1325BK16#1552        | 142 | 21.757 | 0.015498477 | 0.019473996 | 1.26  | 0.313 |
| 760 | 1325BK16#1552        | 186 | 21.757 | 0.012043402 | 0.018286027 | 1.52  | 0.101 |
| 761 | 1325BK16#1589        | 273 | 22.099 | 0.033601875 | 0.013775583 | 0.41  | 0.417 |
| 762 | 1325BK16#1610        | 160 | 22.293 | 0.004766610 | 0.001468271 | 0.31  | 0.441 |
| 763 | 1325BK16#1749        | 159 | 23.595 | 0.016492122 | 0.000950429 | 0.06  | 0.293 |
| 764 | 1325BK16#1900        | 273 | 25.004 | 0.043181122 | 0.028556410 | 0.66  | 0.248 |
| 765 | 1325BK16#1946        | 174 | 25.435 | 0.004789986 | 0.009819607 | 2.05  | 0.003 |
| 766 | 1325BK16#1946        | 299 | 25.435 | 0.007568039 | 0.013769966 | 1.82  | 0.000 |
| 767 | 1325BK16#2257        | 203 | 28.362 | 0.007419498 | 0.018575426 | 2.50  | 0.009 |
| 768 | 1325BK16#2261        | 299 | 28.410 | 0.020143236 | 0.021158000 | 1.05  | 0.807 |
| 769 | 1325BK16#2261        | 204 | 28.410 | 0.017244101 | 0.019468213 | 1.13  | 0.793 |
| 770 | 1325BK16#2280        | 284 | 28.593 | 0.000279253 | 0.000125448 | 0.45  | 0.379 |
| 771 | 1325BK16#2280        | 244 | 28.593 | 0.000509580 | 0.000504544 | 0.99  | 0.974 |
| 772 | 1325BK16#2372        | 185 | 29.448 | 0.000701274 | 0.000324162 | 0.46  | 0.393 |
| 773 | 1325BK16#2500#uric 4 | 456 | 30.735 | 0.000295310 | 0.003129816 | 10.60 | 0.000 |
| 774 | 1325BK16#2500#uric 4 | 441 | 30.735 | 0.000434579 | 0.004118255 | 9.48  | 0.000 |
| 775 | 1325BK16#2538        | 319 | 31.100 | 0.009304065 | 0.013849955 | 1.49  | 0.138 |
| 776 | 1325BK16#2547        | 319 | 31.189 | 0.011644466 | 0.017488254 | 1.50  | 0.128 |
| 777 | 1325BK16#2620        | 199 | 31.914 | 0.000096262 | 0.000181738 | 1.89  | 0.073 |
| 778 | 1325BK16#2633        | 263 | 32.041 | 0.000995754 | 0.000375171 | 0.38  | 0.057 |
| 779 | 1325BK16#2721        | 179 | 32.913 | 0.001224065 | 0.001002856 | 0.82  | 0.202 |
| 780 | 1325BK16#2781        | 250 | 33.500 | 0.000380769 | 0.000728338 | 1.91  | 0.117 |
| 781 | 1325BK16#2785        | 246 | 33.539 | 0.000210128 | 0.000159776 | 0.76  | 0.643 |
| 782 | 1325BK16#2906        | 387 | 34.720 | 0.000093291 | 0.000076660 | 0.82  | 0.460 |
| 783 | 1325BK16#2906        | 299 | 34.720 | 0.000615871 | 0.000092991 | 0.15  | 0.261 |
| 784 | 1325BK16#2954        | 390 | 35.184 | 0.000059439 | 0.000124057 | 2.09  | 0.175 |
| 785 | 1325BK16#2978        | 348 | 35.419 | 0.000056404 | 0.000078894 | 1.40  | 0.492 |
| 786 | 1325BK16#3052        | 374 | 36.146 | 0.001771691 | 0.000080370 | 0.05  | 0.378 |
| 787 | 1325BK16#3060        | 374 | 36.226 | 0.000071127 | 0.000313852 | 4.41  | 0.152 |
| 788 | 1325BK16#3075        | 374 | 36.376 | 0.000085982 | 0.000325986 | 3.79  | 0.395 |
| 789 | 1325BK16#3075        | 260 | 36.376 | 0.000293196 | 0.000158139 | 0.54  | 0.531 |
| 790 | 1325BK16#3089        | 204 | 36.514 | 0.056651342 | 0.031750789 | 0.56  | 0.232 |
| 791 | 1325BK16#3089        | 421 | 36.514 | 0.002531064 | 0.000037034 | 0.01  | 0.375 |
| 792 | 1325BK16#3138        | 462 | 37.006 | 0.001757275 | 0.000021170 | 0.01  | 0.374 |
| 793 | 1325BK16#3138        | 204 | 37.006 | 0.007070880 | 0.006195045 | 0.88  | 0.645 |
| 794 | 1325BK16#3148        | 473 | 37.105 | 0.000025726 | 0.000030236 | 1.18  | 0.693 |
| 795 | 1325BK16#3171        | 271 | 37.336 | 0.003070827 | 0.004067360 | 1.32  | 0.260 |
| 796 | 1325BK16#3184        | 186 | 37.464 | 0.000168999 | 0.000187887 | 1.11  | 0.759 |
| 797 | 1325BK16#3191        | 204 | 37.533 | 0.000846686 | 0.000821138 | 0.97  | 0.907 |
| 798 | 1325BK16#3191        | 117 | 37.533 | 0.000908136 | 0.001297448 | 1.43  | 0.255 |
| 799 | 1325BK16#3281        | 423 | 38.416 | 0.004342898 | 0.000162509 | 0.04  | 0.374 |
| 800 | 1325BK16#3284        | 349 | 38.446 | 0.000105112 | 0.000047438 | 0.45  | 0.447 |
| 801 | 1325BK16#3284        | 259 | 38.446 | 0.000288053 | 0.000365023 | 1.27  | 0.360 |
| 802 | 1325BK16#3293        | 156 | 38.535 | 0.000247578 | 0.000220790 | 0.89  | 0.744 |
| 803 | 1325BK16#3293        | 317 | 38.535 | 0.001250592 | 0.000087689 | 0.07  | 0.335 |
| 804 | 1325BK16#3299        | 450 | 38.593 | 0.000422279 | 0.000403742 | 0.96  | 0.868 |
| 805 | 1325BK16#3299        | 284 | 38.593 | 0.000668973 | 0.001004324 | 1.50  | 0.033 |
| 806 | 1325BK16#3311        | 175 | 38.712 | 0.000138526 | 0.000135608 | 0.98  | 0.967 |
| 807 | 1325BK16#3387        | 466 | 39.459 | 0.000195186 | 0.000105001 | 0.54  | 0.435 |
| 808 | 1325BK16#3387        | 262 | 39.459 | 0.000496759 | 0.000508688 | 1.02  | 0.945 |
| 809 | 1325BK16#3392        | 433 | 39.508 | 0.000236196 | 0.000303081 | 1.28  | 0.529 |
| 810 | 1325BK16#3414        | 160 | 39.724 | 0.001272992 | 0.001369850 | 1.08  | 0.310 |
| 811 | 1325BK16#3426        | 348 | 39.842 | 0.000190489 | 0.000435090 | 2.28  | 0.092 |
| 812 | 1325BK16#3481        | 355 | 40.380 | 0.000146184 | 0.000094316 | 0.65  | 0.184 |
| 813 | 1325BK16#3496        | 189 | 40.533 | 0.001631479 | 0.000895596 | 0.55  | 0.117 |
| 814 | 1325BK16#3496        | 204 | 40.533 | 0.013667648 | 0.010616305 | 0.78  | 0.662 |
| 815 | 1325BK16#3521        | 312 | 40.778 | 0.000032788 | 0.000040655 | 1.24  | 0.636 |
| 816 | 1325BK16#3530        | 525 | 40.866 | 0.001289682 | 0.000025378 | 0.02  | 0.373 |
| 817 | 1325BK16#3530        | 204 | 40.866 | 0.004815751 | 0.007285781 | 1.51  | 0.114 |



|     |                                |     |        |             |             |       |       |
|-----|--------------------------------|-----|--------|-------------|-------------|-------|-------|
| 818 | 1325BK16#3530                  | 345 | 40.866 | 0.000088878 | 0.000130095 | 1.46  | 0.215 |
| 819 | 1325BK16#3549                  | 251 | 41.051 | 0.000083419 | 0.000087454 | 1.05  | 0.887 |
| 820 | 1325BK16#3549                  | 292 | 41.051 | 0.000616258 | 0.000076174 | 0.12  | 0.383 |
| 821 | 1325BK16#3566                  | 332 | 41.216 | 0.000456757 | 0.000490999 | 1.07  | 0.793 |
| 822 | 1325BK16#3566                  | 361 | 41.216 | 0.000423825 | 0.000523859 | 1.24  | 0.552 |
| 823 | 1325BK16#3571                  | 358 | 41.255 | 0.000119213 | 0.000038272 | 0.32  | 0.388 |
| 824 | 1325BK16#3607                  | 251 | 41.615 | 0.000079961 | 0.000160213 | 2.00  | 0.039 |
| 825 | 1325BK16#3607                  | 292 | 41.615 | 0.000028740 | 0.000050333 | 1.75  | 0.079 |
| 826 | 1325BK16#3614                  | 318 | 41.684 | 0.000359129 | 0.000173606 | 0.48  | 0.463 |
| 827 | 1325BK16#3622                  | 204 | 41.762 | 0.001716261 | 0.004441205 | 2.59  | 0.001 |
| 828 | 1325BK16#3663                  | 318 | 42.161 | 0.000070865 | 0.000332593 | 4.69  | 0.013 |
| 829 | 1325BK16#3692                  | 318 | 42.441 | 0.005097547 | 0.004733286 | 0.93  | 0.269 |
| 830 | 1325BK16#3703                  | 204 | 42.548 | 0.207176295 | 0.192831101 | 0.93  | 0.379 |
| 831 | 1325BK16#3703                  | 259 | 42.548 | 0.000366675 | 0.000400297 | 1.09  | 0.683 |
| 832 | 1325BK16#3802                  | 375 | 43.487 | 0.000057965 | 0.000049014 | 0.85  | 0.502 |
| 833 | 1325BK16#3802                  | 318 | 43.487 | 0.000080223 | 0.000115718 | 1.44  | 0.302 |
| 834 | 1325BK16#3825                  | 91  | 43.721 | 0.000831574 | 0.000493361 | 0.59  | 0.053 |
| 835 | 1325BK16#3825                  | 204 | 43.721 | 0.023084113 | 0.046763438 | 2.03  | 0.003 |
| 836 | 1325BK16#3923                  | 91  | 44.673 | 0.000492487 | 0.000169580 | 0.34  | 0.006 |
| 837 | 1325BK16#3923                  | 204 | 44.673 | 0.001339846 | 0.000431093 | 0.32  | 0.016 |
| 838 | 1325BK16#3944                  | 349 | 44.873 | 0.000024510 | 0.000034080 | 1.39  | 0.291 |
| 839 | 1325BK16#3976                  | 119 | 45.182 | 0.000226488 | 0.000245515 | 1.08  | 0.774 |
| 840 | 1325BK16#3976                  | 259 | 45.182 | 0.000552951 | 0.000052078 | 0.09  | 0.062 |
| 841 | 1325BK16#4011                  | 91  | 45.511 | 0.000178599 | 0.000149295 | 0.84  | 0.547 |
| 842 | 1325BK16#4011                  | 204 | 45.511 | 0.000848258 | 0.000665826 | 0.78  | 0.335 |
| 843 | 1325BK16#4041                  | 349 | 45.796 | 0.000023155 | 0.000027323 | 1.18  | 0.419 |
| 844 | 1325BK16#4304                  | 441 | 48.284 | 0.001739209 | 0.000527974 | 0.30  | 0.024 |
| 845 | 1331BK22#2910                  | 202 | 34.720 | 0.003978430 | 0.000262377 | 0.07  | 0.059 |
| 846 | 1331BK22#2910                  | 361 | 34.720 | 0.009281011 | 0.000265501 | 0.03  | 0.082 |
| 847 | 1333BN04#2233#galacturonic MX1 | 333 | 28.162 | 0.003769997 | 0.002702804 | 0.72  | 0.502 |
| 848 | 1333BN06#2264#galacturonic MX1 | 364 | 28.162 | 0.000433089 | 0.000345843 | 0.80  | 0.526 |
| 849 | 1333BN06#2295#galacturonic MX2 | 333 | 28.450 | 0.002730608 | 0.003323622 | 1.22  | 0.234 |
| 850 | 1333BN06#2376#saccharic        | 373 | 29.206 | 0.001985010 | 0.000251104 | 0.13  | 0.397 |
| 851 | 1333BN07#2253                  | 243 | 28.406 | 0.009987160 | 0.011350159 | 1.14  | 0.733 |
| 852 | 1333BN09#2268                  | 333 | 28.910 | 0.012883135 | 0.010033262 | 0.78  | 0.477 |
| 853 | 1333BN09#2268                  | 292 | 28.910 | 0.026240958 | 0.027014115 | 1.03  | 0.567 |
| 854 | 1334BV09#1143#O-acet-serine    | 174 | 17.897 | 0.002398122 | 0.112995305 | 47.12 | 0.000 |
| 855 | 1334BV11#1880#putrescine 4     | 361 | 24.487 | 0.012878729 | 0.066333658 | 5.15  | 0.000 |
| 856 | 1334BV11#1880#putrescine 4     | 214 | 24.487 | 0.038345028 | 0.349088338 | 9.10  | 0.000 |
| 857 | 1334BV11#1885                  | 256 | 24.533 | 0.095406256 | 0.097209282 | 1.02  | 0.985 |
| 858 | 1334BV12#1883                  | 174 | 24.533 | 0.147652892 | 1.788613634 | 12.11 | 0.100 |
| 859 | 1334BV12#1883                  | 213 | 24.533 | 0.014001715 | 0.168638322 | 12.04 | 0.000 |
| 860 | 1334BV12#1883                  | 314 | 24.533 | 0.011507823 | 0.155302827 | 13.50 | 0.000 |
| 861 | 1334BV17#1407#N-acet-serine    | 132 | 20.301 | 0.001997826 | 0.018391560 | 9.21  | 0.000 |
| 862 | 1334BV17#1407#N-acet-serine    | 186 | 20.301 | 0.000880644 | 0.028673681 | 32.56 | 0.000 |
| 863 | 1334BV17#1407#N-acet-serine    | 261 | 20.301 | 0.000802773 | 0.020458736 | 25.49 | 0.000 |
| 864 | 1334BV19#3944                  | 204 | 43.806 | 0.023211174 | 0.046824596 | 2.02  | 0.003 |
| 865 | 1334BV19#3944                  | 337 | 43.806 | 0.000908539 | 0.002400027 | 2.64  | 0.003 |
| 866 | 1334BV20#2975                  | 451 | 34.690 | 0.001812302 | 0.000725358 | 0.40  | 0.072 |
| 867 | 1334BV20#2975                  | 375 | 34.690 | 0.003752736 | 0.001699774 | 0.45  | 0.043 |
| 868 | 1334BV20#3961                  | 202 | 43.806 | 0.025362803 | 0.001848045 | 0.07  | 0.015 |
| 869 | 1334BV20#3961                  | 227 | 43.806 | 0.015470652 | 0.001243774 | 0.08  | 0.013 |
| 870 | 1334BV21#1152#O-acet-serine    | 116 | 17.897 | 0.001664692 | 0.040317711 | 24.22 | 0.000 |
| 871 | 1334BV21#1152#O-acet-serine    | 132 | 17.897 | 0.001865871 | 0.048701892 | 26.10 | 0.000 |
| 872 | 1334BV21#1407                  | 289 | 20.257 | 0.000574631 | 0.012080764 | 21.02 | 0.000 |
| 873 | 1334BV21#1407                  | 304 | 20.257 | 0.057139621 | 0.005988219 | 0.10  | 0.420 |
| 874 | 1334BV21#2181                  | 174 | 27.244 | 0.179299653 | 0.530295165 | 2.96  | 0.001 |
| 875 | 1334BV21#2181                  | 347 | 27.244 | 0.005901088 | 0.041767112 | 7.08  | 0.000 |
| 876 | 1334BV21#2181                  | 405 | 27.244 | 0.023615927 | 0.028435794 | 1.20  | 0.808 |
| 877 | 1334BV27#1828                  | 392 | 24.032 | 0.006169996 | 0.004855993 | 0.79  | 0.254 |
| 878 | 1334BV27#1828                  | 275 | 24.032 | 0.032010890 | 0.018532375 | 0.58  | 0.609 |
| 879 | 1334BV27#2301                  | 257 | 28.358 | 0.004927129 | 0.002551642 | 0.52  | 0.192 |
| 880 | 1334BV27#2301                  | 188 | 28.358 | 0.005953681 | 0.004314610 | 0.72  | 0.625 |

|     |               |     |        |             |             |       |       |
|-----|---------------|-----|--------|-------------|-------------|-------|-------|
| 881 | 1334BV27#3745 | 361 | 41.695 | 0.001797699 | 0.000188379 | 0.10  | 0.048 |
| 882 | 1334BV27#3745 | 306 | 41.695 | 0.001024858 | 0.000112055 | 0.11  | 0.245 |
| 883 | 1334BV27#3745 | 217 | 41.695 | 0.002789153 | 0.001079768 | 0.39  | 0.104 |
| 884 | 1334BV27#3812 | 361 | 42.311 | 0.002088124 | 0.000175440 | 0.08  | 0.014 |
| 885 | 1334BV27#3812 | 319 | 42.311 | 0.000290054 | 0.000057175 | 0.20  | 0.017 |
| 886 | 1334BV27#3812 | 85  | 42.311 | 0.007905110 | 0.007505635 | 0.95  | 0.222 |
| 887 | 1334BV27#3844 | 140 | 42.609 | 0.007705270 | 0.000435456 | 0.06  | 0.008 |
| 888 | 1334BV27#3844 | 361 | 42.609 | 0.002871159 | 0.055047363 | 19.17 | 0.028 |
| 889 | 1334BV27#3844 | 169 | 42.609 | 0.001083113 | 0.034066887 | 31.45 | 0.001 |
| 890 | 1334BV27#3864 | 324 | 42.790 | 0.017329973 | 0.090731211 | 5.24  | 0.002 |
| 891 | 1334BV27#3864 | 361 | 42.790 | 0.013793105 | 0.069475028 | 5.04  | 0.001 |
| 892 | 1334BV27#3864 | 450 | 42.790 | 0.003394611 | 0.017412144 | 5.13  | 0.001 |
| 893 | 1334BV27#3887 | 361 | 42.991 | 0.016344984 | 0.069492055 | 4.25  | 0.001 |
| 894 | 1334BV27#3887 | 217 | 42.991 | 0.010934531 | 0.082038580 | 7.50  | 0.000 |
| 895 | 1334BV27#3887 | 169 | 42.991 | 0.004056229 | 0.034106034 | 8.41  | 0.001 |
| 896 | 1334BV27#3920 | 361 | 43.298 | 0.009159192 | 0.000364334 | 0.04  | 0.011 |
| 897 | 1334BV27#3920 | 217 | 43.298 | 0.008143199 | 0.000694104 | 0.09  | 0.008 |
| 898 | 1334BV27#3920 | 169 | 43.298 | 0.002880702 | 0.000268613 | 0.09  | 0.011 |
| 899 | 1334BV27#4011 | 130 | 44.138 | 0.016709854 | 0.001983480 | 0.12  | 0.017 |
| 900 | 1334BV27#4011 | 155 | 44.138 | 0.007163327 | 0.000896939 | 0.13  | 0.010 |
| 901 | 1334BV27#4011 | 361 | 44.138 | 0.008818471 | 0.000765591 | 0.09  | 0.026 |
| 902 | 1334BV27#4073 | 105 | 44.722 | 0.005350695 | 0.000500077 | 0.09  | 0.010 |
| 903 | 1334BV27#4073 | 361 | 44.722 | 0.002408262 | 0.000332898 | 0.14  | 0.023 |
| 904 | 1334BV27#4073 | 217 | 44.722 | 0.004431752 | 0.001417085 | 0.32  | 0.023 |
| 905 | 1334BV27#4103 | 257 | 45.004 | 0.003121388 | 0.000686343 | 0.22  | 0.007 |
| 906 | 1334BV27#4103 | 232 | 45.004 | 0.003153875 | 0.000671545 | 0.21  | 0.004 |
| 907 | 1334BV27#4103 | 379 | 45.004 | 0.000237271 | 0.000068825 | 0.29  | 0.008 |
| 908 | 1334BV28#1746 | 275 | 23.324 | 0.064562647 | 0.300313626 | 4.65  | 0.000 |
| 909 | 1334BV28#1746 | 244 | 23.324 | 0.012390972 | 0.040593446 | 3.28  | 0.000 |
| 910 | 1334BV28#1746 | 155 | 23.324 | 0.015961436 | 0.050190673 | 3.14  | 0.000 |
| 911 | 1334BV28#1779 | 243 | 23.526 | 0.010443327 | 0.229641784 | 21.99 | 0.007 |
| 912 | 1334BV28#1779 | 345 | 23.526 | 0.001540007 | 0.031532339 | 20.48 | 0.007 |
| 913 | 1334BV28#1779 | 317 | 23.526 | 0.001456401 | 0.028304136 | 19.43 | 0.010 |
| 914 | 1334BV28#1818 | 319 | 23.978 | 0.018892609 | 0.115004164 | 6.09  | 0.005 |
| 915 | 1334BV28#1818 | 304 | 23.978 | 0.010302313 | 0.050153080 | 4.87  | 0.006 |
| 916 | 1334BV28#1818 | 190 | 23.978 | 0.028128048 | 0.057245941 | 2.04  | 0.201 |
| 917 | 1334BV28#2060 | 231 | 26.208 | 0.013606868 | 0.012598216 | 0.93  | 0.623 |
| 918 | 1334BV28#2060 | 333 | 26.208 | 0.005874713 | 0.006752698 | 1.15  | 0.365 |
| 919 | 1334BV28#2060 | 480 | 26.208 | 0.032746728 | 0.003363884 | 0.10  | 0.377 |
| 920 | 1334BV28#2242 | 200 | 27.883 | 0.007951971 | 0.027530484 | 3.46  | 0.063 |
| 921 | 1334BV28#2242 | 389 | 27.883 | 0.000624087 | 0.013608104 | 21.80 | 0.028 |
| 922 | 1334BV28#2242 | 506 | 27.883 | 0.002745147 | 0.002874156 | 1.05  | 0.964 |
| 923 | 1334BV28#2287 | 347 | 28.308 | 0.011223562 | 0.009367239 | 0.83  | 0.818 |
| 924 | 1334BV28#2287 | 232 | 28.308 | 0.020198505 | 0.045577055 | 2.26  | 0.027 |
| 925 | 1334BV28#2287 | 449 | 28.308 | 0.006582747 | 0.017379293 | 2.64  | 0.021 |
| 926 | 1334BV28#2613 | 326 | 31.222 | 0.000101351 | 0.004342573 | 42.85 | 0.175 |
| 927 | 1334BV28#2613 | 290 | 31.222 | 0.000658421 | 0.005630572 | 8.55  | 0.121 |
| 928 | 1334BV28#2613 | 428 | 31.222 | 0.002953781 | 0.002266821 | 0.77  | 0.833 |
| 929 | 1334BV28#3011 | 204 | 35.139 | 0.001643355 | 0.018403523 | 11.20 | 0.001 |
| 930 | 1334BV28#3011 | 157 | 35.139 | 0.000672309 | 0.007750025 | 11.53 | 0.002 |
| 931 | 1334BV28#3011 | 191 | 35.139 | 0.001136112 | 0.004990415 | 4.39  | 0.004 |
| 932 | 1334BV28#3022 | 204 | 35.238 | 0.001293074 | 0.005857209 | 4.53  | 0.001 |
| 933 | 1334BV28#3022 | 157 | 35.238 | 0.000836362 | 0.006033433 | 7.21  | 0.000 |
| 934 | 1334BV28#3022 | 331 | 35.238 | 0.000212770 | 0.001211317 | 5.69  | 0.001 |
| 935 | 1334BV28#3050 | 105 | 35.495 | 0.014541628 | 0.039659894 | 2.73  | 0.001 |
| 936 | 1334BV28#3050 | 331 | 35.495 | 0.004289210 | 0.001977386 | 0.46  | 0.536 |
| 937 | 1334BV28#3050 | 217 | 35.495 | 0.013390761 | 0.036461821 | 2.72  | 0.001 |
| 938 | 1334BV28#3103 | 446 | 35.994 | 0.000296424 | 0.002404919 | 8.11  | 0.017 |
| 939 | 1334BV28#3103 | 415 | 35.994 | 0.000402301 | 0.000407201 | 1.01  | 0.985 |
| 940 | 1334BV28#3103 | 217 | 35.994 | 0.001657663 | 0.001829371 | 1.10  | 0.864 |
| 941 | 1334BV28#3422 | 406 | 38.997 | 0.024646669 | 0.021692680 | 0.88  | 0.617 |
| 942 | 1334BV28#3422 | 217 | 38.997 | 0.035344899 | 0.041766951 | 1.18  | 0.501 |
| 943 | 1334BV28#3422 | 495 | 38.997 | 0.001669055 | 0.002312509 | 1.39  | 0.227 |

|      |                               |     |        |             |             |      |       |
|------|-------------------------------|-----|--------|-------------|-------------|------|-------|
| 944  | 1334BV28#3687                 | 324 | 41.474 | 0.000673284 | 0.002316281 | 3.44 | 0.001 |
| 945  | 1334BV28#3687                 | 450 | 41.474 | 0.000413176 | 0.000529198 | 1.28 | 0.561 |
| 946  | 1334BV28#3687                 | 361 | 41.474 | 0.000824785 | 0.002040094 | 2.47 | 0.002 |
| 947  | 1334BV28#3753                 | 204 | 42.076 | 0.003214132 | 0.016483957 | 5.13 | 0.000 |
| 948  | 1334BV28#3753                 | 357 | 42.076 | 0.000202914 | 0.000928331 | 4.58 | 0.000 |
| 949  | 1334BV28#3753                 | 239 | 42.076 | 0.000240374 | 0.001030731 | 4.29 | 0.003 |
| 950  | 1334BV28#3871                 | 354 | 43.152 | 0.002074230 | 0.009183600 | 4.43 | 0.001 |
| 951  | 1334BV28#3871                 | 361 | 43.152 | 0.001402338 | 0.005365236 | 3.83 | 0.001 |
| 952  | 1334BV28#3871                 | 450 | 43.152 | 0.000462564 | 0.001976004 | 4.27 | 0.001 |
| 953  | 1338AU05#2775#sorbitol-6-P    | 387 | 34.463 | 0.000068347 | 0.000050207 | 0.73 | 0.395 |
| 954  | 1338AU05#2775#sorbitol-6-P    | 299 | 34.463 | 0.000105516 | 0.000083261 | 0.79 | 0.554 |
| 955  | 1338AU05#2775#sorbitol-6-P    | 315 | 34.463 | 0.000072137 | 0.000063179 | 0.88 | 0.704 |
| 956  | 1338AU07#2713#gal-6-P MX1     | 299 | 33.813 | 0.026660883 | 0.038951924 | 1.46 | 0.024 |
| 957  | 1338AU07#2713#gal-6-P MX1     | 387 | 33.813 | 0.019290179 | 0.036479075 | 1.89 | 0.014 |
| 958  | 1338AU07#2713#gal-6-P MX1     | 160 | 33.813 | 0.009019881 | 0.015794326 | 1.75 | 0.024 |
| 959  | 1338AU07#2745#gal-6-P MX2     | 387 | 34.107 | 0.003384610 | 0.006758741 | 2.00 | 0.018 |
| 960  | 1338AU12#1860#glyceric-3-P    | 299 | 25.932 | 0.002096811 | 0.001581555 | 0.75 | 0.534 |
| 961  | 1338AU12#1860#glyceric-3-P    | 387 | 25.932 | 0.000811152 | 0.000514656 | 0.63 | 0.354 |
| 962  | 1338AU12#1860#glyceric-3-P    | 459 | 25.932 | 0.000602429 | 0.000211309 | 0.35 | 0.173 |
| 963  | 1340AU03#1851#p-aminobenzoic  | 266 | 26.300 | 0.000464725 | 0.000286992 | 0.62 | 0.074 |
| 964  | 1340AU03#1851#p-aminobenzoic  | 281 | 26.300 | 0.000542609 | 0.000140422 | 0.26 | 0.053 |
| 965  | 1340AU03#1851#p-aminobenzoic  | 222 | 26.300 | 0.001427601 | 0.001204171 | 0.84 | 0.688 |
| 966  | 1340AU04#0792#norleucine 2    | 158 | 16.236 | 0.000115877 | 0.000141341 | 1.22 | 0.640 |
| 967  | 1340AU04#0792#norleucine 2    | 232 | 16.236 | 0.000066758 | 0.000062352 | 0.93 | 0.786 |
| 968  | 1340AU04#0792#norleucine 2    | 260 | 16.236 | 0.000060251 | 0.000101406 | 1.68 | 0.197 |
| 969  | 1340AU06#1981#allantoin 4     | 331 | 27.205 | 0.053254244 | 0.055152570 | 1.04 | 0.950 |
| 970  | 1340AU06#1981#allantoin 4     | 431 | 27.205 | 0.009540117 | 0.007536980 | 0.79 | 0.468 |
| 971  | 1340AU06#1981#allantoin 4     | 446 | 27.205 | 0.015713151 | 0.013310148 | 0.85 | 0.531 |
| 972  | 1340AU06#2014#allantoin 5     | 518 | 27.512 | 0.000135965 | 0.000832247 | 6.12 | 0.069 |
| 973  | 1340AU06#2014#allantoin 5     | 428 | 27.512 | 0.000418529 | 0.000476348 | 1.14 | 0.724 |
| 974  | 1340AU06#2014#allantoin 5     | 403 | 27.512 | 0.025725916 | 0.000494573 | 0.02 | 0.360 |
| 975  | 1340AU07#1942#adenine         | 264 | 26.916 | 0.001330617 | 0.004434262 | 3.33 | 0.003 |
| 976  | 1340AU07#1942#adenine         | 279 | 26.916 | 0.000267267 | 0.000445094 | 1.67 | 0.332 |
| 977  | 1340AU07#1942#adenine         | 192 | 26.916 | 0.000760031 | 0.000972948 | 1.28 | 0.432 |
| 978  | 1340AU09#2378#guanine         | 352 | 31.071 | 0.000066823 | 0.000091637 | 1.37 | 0.421 |
| 979  | 1340AU09#2378#guanine         | 367 | 31.071 | 0.000104167 | 0.000049160 | 0.47 | 0.285 |
| 980  | 1340AU09#2378#guanine         | 264 | 31.071 | 0.000220499 | 0.000196047 | 0.89 | 0.661 |
| 981  | 1340AU10#1717#aconitic        | 285 | 24.894 | 0.001752597 | 0.003570652 | 2.04 | 0.236 |
| 982  | 1340AU10#1717#aconitic        | 375 | 24.894 | 0.002336016 | 0.004287246 | 1.84 | 0.294 |
| 983  | 1340AU10#1717#aconitic        | 229 | 24.894 | 0.007404044 | 0.011385093 | 1.54 | 0.408 |
| 984  | 1340AU11#2058#p-coumaric      | 249 | 28.101 | 0.001867822 | 0.001041180 | 0.56 | 0.003 |
| 985  | 1340AU11#2058#p-coumaric      | 293 | 28.101 | 0.001677288 | 0.000640883 | 0.38 | 0.072 |
| 986  | 1340AU11#2058#p-coumaric      | 308 | 28.101 | 0.001396844 | 0.000430010 | 0.31 | 0.210 |
| 987  | 1340AU12#1826#o-coumaric      | 293 | 25.885 | 0.001428783 | 0.001814463 | 1.27 | 0.709 |
| 988  | 1340AU12#1826#o-coumaric      | 308 | 25.885 | 0.001260714 | 0.000266528 | 0.21 | 0.304 |
| 989  | 1340AU12#1826#o-coumaric      | 161 | 25.885 | 0.005059319 | 0.001866295 | 0.37 | 0.016 |
| 990  | 1340AU14#3254#adenosine       | 322 | 38.986 | 0.000169230 | 0.000179582 | 1.06 | 0.615 |
| 991  | 1340AU14#3254#adenosine       | 465 | 38.986 | 0.000142804 | 0.000203952 | 1.43 | 0.219 |
| 992  | 1340AU14#3254#adenosine       | 540 | 38.986 | 0.000284075 | 0.000022203 | 0.08 | 0.376 |
| 993  | 1340AU15#2109#indole-3-acetic | 202 | 28.475 | 0.000723102 | 0.000556862 | 0.77 | 0.716 |
| 994  | 1340AU15#2109#indole-3-acetic | 319 | 28.475 | 0.002447603 | 0.003817960 | 1.56 | 0.555 |
| 995  | 1340AU15#2109#indole-3-acetic | 276 | 28.475 | 0.000731902 | 0.000419332 | 0.57 | 0.595 |
| 996  | 1340AU18#2564#spermidine      | 156 | 32.807 | 0.007631503 | 0.002594274 | 0.34 | 0.522 |
| 997  | 1340AU20#1028#S-me-cysteine 2 | 162 | 18.434 | 0.004810102 | 0.005350784 | 1.11 | 0.696 |
| 998  | 1340AU20#1028#S-me-cysteine 2 | 218 | 18.434 | 0.001382908 | 0.001968243 | 1.42 | 0.135 |
| 999  | 1340AU20#1028#S-me-cysteine 2 | 236 | 18.434 | 0.005199526 | 0.000630652 | 0.12 | 0.375 |
| 1000 | 1340AU21#0999#glutaric        | 158 | 18.132 | 0.001737354 | 0.001949554 | 1.12 | 0.501 |
| 1001 | 1340AU21#0999#glutaric        | 261 | 18.132 | 0.001138222 | 0.001364198 | 1.20 | 0.423 |
| 1002 | 1340AU21#0999#glutaric        | 233 | 18.132 | 0.000438173 | 0.000465674 | 1.06 | 0.730 |
| 1003 | 2009AU02#4302                 | 204 | 46.743 | 0.000774717 | 0.003404730 | 4.39 | 0.234 |
| 1004 | 2009AU02#4302                 | 191 | 46.743 | 0.000777529 | 0.001336033 | 1.72 | 0.228 |
| 1005 | 2009AU02#4302                 | 259 | 46.743 | 0.000071556 | 0.000185682 | 2.59 | 0.039 |
| 1006 | 2009AU04#3664#melibiose MX1   | 204 | 40.845 | 0.005356085 | 0.007285781 | 1.36 | 0.058 |

|      |                                |         |        |             |             |      |       |
|------|--------------------------------|---------|--------|-------------|-------------|------|-------|
| 1007 | 2009AU04#3664#melibiose MX1    | 361     | 40.845 | 0.001992113 | 0.003462720 | 1.74 | 0.041 |
| 1008 | 2009AU04#3664#melibiose MX1    | 480     | 40.845 | 0.000108188 | 0.000176347 | 1.63 | 0.047 |
| 1009 | 2009AU04#4352#melezitose       | 361     | 47.192 | 0.000072673 | 0.000081936 | 1.13 | 0.729 |
| 1010 | 2009AU04#4352#melezitose       | 451     | 47.192 | 0.000056639 | 0.000026760 | 0.47 | 0.091 |
| 1011 | 2009AU04#4352#melezitose       | 271     | 47.192 | 0.000080635 | 0.000075437 | 0.94 | 0.834 |
| 1012 | 2009AU07#3699#melibiose MX2    | 204     | 41.168 | 0.002442433 | 0.001439231 | 0.59 | 0.162 |
| 1013 | 2009AU07#3699#melibiose MX2    | 361     | 41.168 | 0.000448087 | 0.000663834 | 1.48 | 0.177 |
| 1014 | 2009AU07#3699#melibiose MX2    | 160     | 41.168 | 0.000182634 | 0.000338765 | 1.85 | 0.038 |
| 1015 | 2009AU13#3506#trehalose        | 169     | 39.356 | 0.009893265 | 0.002537009 | 0.26 | 0.234 |
| 1016 | 2009AU13#3506#trehalose        | 361     | 39.356 | 0.018313599 | 0.012835835 | 0.70 | 0.191 |
| 1017 | 2015BV03#0799#serine 2         | 219     | 14.818 | 0.045346793 | 0.107878121 | 2.38 | 0.000 |
| 1018 | 2015BV03#1056#serine 3         | 204     | 17.133 | 0.402486550 | 1.046228846 | 2.60 | 0.002 |
| 1019 | 2015BV03#1056#serine 3         | 278     | 17.133 | 0.023498284 | 0.059240710 | 2.52 | 0.003 |
| 1020 | 2015BV30#2713#tryptamine       | 174     | 32.434 | 0.000993025 | 0.001655713 | 1.67 | 0.176 |
| 1021 | 2015BV30#2713#tryptamine       | 273     | 32.434 | 0.000065251 | 0.000092179 | 1.41 | 0.310 |
| 1022 | 2015BV30#2713#tryptamine       | 361     | 32.434 | 0.001077399 | 0.000114917 | 0.11 | 0.372 |
| 1023 | 2066BN03#1003#nicotine         | 84      | 16.891 | 0.004822798 | 0.002039332 | 0.42 | 0.212 |
| 1024 | 2066BN03#1003#nicotine         | 133     | 16.891 | 0.086869047 | 0.046944655 | 0.54 | 0.463 |
| 1025 | 2066BN03#1003#nicotine         | 161+162 | 16.891 | 0.001300063 | 0.000650299 | 0.50 | 0.540 |
| 1026 | 2066BN03#1003#nicotine         | 85      | 16.891 | 0.004545647 | 0.001742626 | 0.38 | 0.099 |
| 1027 | 2066BN03#1382#salicylic        | 267     | 20.265 | 0.002172590 | 0.004650662 | 2.14 | 0.002 |
| 1028 | 2066BN03#1382#salicylic        | 268     | 20.265 | 0.000730855 | 0.001392125 | 1.90 | 0.025 |
| 1029 | 2066BN03#1382#salicylic        | 209     | 20.265 | 0.000472337 | 0.000778946 | 1.65 | 0.005 |
| 1030 | 2066BN03#1382#salicylic        | 91      | 20.265 | 0.001274005 | 0.000848997 | 0.67 | 0.583 |
| 1031 | 2066BN03#1722#t-o-coumaric     | 190     | 23.300 | 0.001601626 | 0.002817600 | 1.76 | 0.027 |
| 1032 | 2066BN03#1722#t-o-coumaric     | 293     | 23.300 | 0.000383329 | 0.000193104 | 0.50 | 0.431 |
| 1033 | 2066BN03#1722#t-o-coumaric     | 308     | 23.300 | 0.004647500 | 0.001498563 | 0.32 | 0.119 |
| 1034 | 2066BN03#1722#t-o-coumaric     | 161     | 23.300 | 0.003719751 | 0.001920239 | 0.52 | 0.459 |
| 1035 | 2077BN06#1973#galactonic       | 333     | 28.978 | 0.012883135 | 0.010033262 | 0.78 | 0.477 |
| 1036 | 2077BN06#1973#galactonic       | 292     | 28.978 | 0.021094533 | 0.027039887 | 1.28 | 0.320 |
| 1037 | 2077BN06#1973#galactonic       | 423     | 28.978 | 0.000953474 | 0.000582131 | 0.61 | 0.344 |
| 1038 | 2077BN06#1973#galactonic       | 433     | 28.978 | 0.002389155 | 0.002398871 | 1.00 | 0.951 |
| 1039 | 2077BN07#1944#gulonic          | 333     | 28.433 | 0.002639205 | 0.003375284 | 1.28 | 0.113 |
| 1040 | 2077BN07#1944#gulonic          | 292     | 28.433 | 0.002474354 | 0.002974020 | 1.20 | 0.459 |
| 1041 | 2077BN07#1944#gulonic          | 423     | 28.433 | 0.000274218 | 0.000269164 | 0.98 | 0.931 |
| 1042 | 2077BN07#1944#gulonic          | 433     | 28.433 | 0.010045751 | 0.000321732 | 0.03 | 0.373 |
| 1043 | 2077BN11#1910#glucuronic MX1   | 333     | 28.018 | 0.006482476 | 0.006680614 | 1.03 | 0.821 |
| 1044 | 2077BN11#1910#glucuronic MX1   | 160     | 28.018 | 0.002553554 | 0.005977647 | 2.34 | 0.005 |
| 1045 | 2077BN11#1910#glucuronic MX1   | 423     | 28.018 | 0.002918976 | 0.000409512 | 0.14 | 0.371 |
| 1046 | 2077BN11#1932#glucuronic MX2   | 160     | 28.245 | 0.005163775 | 0.007181796 | 1.39 | 0.200 |
| 1047 | 2077BN11#1932#glucuronic MX2   | 292     | 28.245 | 0.001856102 | 0.002500716 | 1.35 | 0.485 |
| 1048 | 2077BN11#1932#glucuronic MX2   | 393     | 28.245 | 0.000863896 | 0.000191810 | 0.22 | 0.311 |
| 1049 | 2081BN03#2686#t-3,5ME4OHcin MX | 174     | 30.838 | 0.001867590 | 0.006090800 | 3.26 | 0.004 |
| 1050 | 2081BN03#2686#t-3,5ME4OHcin MX | 248     | 30.838 | 0.000147800 | 0.000131428 | 0.89 | 0.609 |
| 1051 | 2081BN03#2686#t-3,5ME4OHcin MX | 309     | 30.838 | 0.000112003 | 0.000136933 | 1.22 | 0.517 |
| 1052 | 2081BN04#2381#coniferyl alcol  | 324     | 28.143 | 0.000479848 | 0.000578650 | 1.21 | 0.592 |
| 1053 | 2081BN04#2381#coniferyl alcol  | 293     | 28.143 | 0.002508269 | 0.001183234 | 0.47 | 0.101 |
| 1054 | 2081BN04#2381#coniferyl alcol  | 235     | 28.143 | 0.001301757 | 0.002028863 | 1.56 | 0.371 |
| 1055 | 2081BN05#2389#t-3ME4OHcin MX2  | 248     | 28.252 | 0.000382353 | 0.000467354 | 1.22 | 0.578 |
| 1056 | 2081BN05#2389#t-3ME4OHcin MX2  | 279     | 28.252 | 0.000488312 | 0.000354527 | 0.73 | 0.749 |
| 1057 | 2081BN05#2389#t-3ME4OHcin MX2  | 218     | 28.252 | 0.006034066 | 0.010945940 | 1.81 | 0.481 |
| 1058 | 2081BN05#2406#t-3ME4OHcin MX1  | 279     | 28.437 | 0.000265109 | 0.000114039 | 0.43 | 0.412 |
| 1059 | 2081BN05#2406#t-3ME4OHcin MX1  | 248     | 28.437 | 0.003545677 | 0.001150293 | 0.32 | 0.374 |
| 1060 | 2081BN05#2406#t-3ME4OHcin MX1  | 218     | 28.437 | 0.014131569 | 0.019384794 | 1.37 | 0.516 |
| 1061 | 2081BN06#2646#sinapyl alkal    | 354     | 30.473 | 0.001025909 | 0.000245000 | 0.24 | 0.384 |
| 1062 | 2081BN06#2646#sinapyl alkal    | 234     | 30.473 | 0.002942630 | 0.004288529 | 1.46 | 0.225 |
| 1063 | 2081BN06#2646#sinapyl alkal    | 323     | 30.473 | 0.006619715 | 0.000926356 | 0.14 | 0.326 |
| 1064 | 2081BN09#3943                  | 556     | 41.942 | 0.000015764 | 0.000016546 | 1.05 | 0.915 |
| 1065 | 2081BN09#3943                  | 526     | 41.942 | 0.000034194 | 0.000015870 | 0.46 | 0.187 |
| 1066 | 2081BN09#3943                  | 279     | 41.942 | 0.000465814 | 0.000056796 | 0.12 | 0.387 |
| 1067 | 2081BN33#3156                  | 174     | 35.040 | 0.000193126 | 0.000373652 | 1.93 | 0.158 |
| 1068 | 2081BN33#3156                  | 324     | 35.040 | 0.000047591 | 0.000074043 | 1.56 | 0.114 |
| 1069 | 2081BN33#3156                  | 455     | 35.040 | 0.000547217 | 0.000051084 | 0.09 | 0.387 |

|      |               |     |        |             |             |      |       |
|------|---------------|-----|--------|-------------|-------------|------|-------|
| 1070 | 2081BN33#3665 | 556 | 39.454 | 0.000014147 | 0.000012190 | 0.86 | 0.460 |
| 1071 | 2081BN33#3665 | 526 | 39.454 | 0.000041957 | 0.000023113 | 0.55 | 0.447 |
| 1072 | 2081BN33#3665 | 279 | 39.454 | 0.001309111 | 0.000208043 | 0.16 | 0.379 |

|    |                                |         |         |             |             |         |         | Constitutive starvation, date point 2 (c2) |  |  |  |
|----|--------------------------------|---------|---------|-------------|-------------|---------|---------|--------------------------------------------|--|--|--|
| #  | NAME                           | Q_TRACE | PRED_RT | Avg Resp nS | Avg Resp -S | R -S/nS | P-value |                                            |  |  |  |
| 1  | 1090DK05#4896#1-t-caffeoquinic | 307     | 46.502  | 0.000222939 | 0.000347593 | 1.56    | 0.339   |                                            |  |  |  |
| 2  | 1090DK05#4896#1-t-caffeoquinic | 324     | 46.502  | 0.000052058 | 0.000057115 | 1.10    | 0.811   |                                            |  |  |  |
| 3  | 1090DK05#4896#1-t-caffeoquinic | 219     | 46.502  | 0.002227124 | 0.004654191 | 2.09    | 0.055   |                                            |  |  |  |
| 4  | 1164CC35#1780#arginine 5       | 256     | 26.181  | 0.235247667 | 0.035479784 | 0.15    | 0.021   |                                            |  |  |  |
| 5  | 1164CC35#1780#arginine 5       | 157     | 26.181  | 0.406656549 | 0.061837718 | 0.15    | 0.017   |                                            |  |  |  |
| 6  | 1164CC37#1216                  | 243     | 20.159  | 0.263651730 | 0.472151823 | 1.79    | 0.021   |                                            |  |  |  |
| 7  | 1164CC37#1220                  | 142     | 20.257  | 0.009436362 | 0.145219742 | 15.39   | 0.000   |                                            |  |  |  |
| 8  | 1164CC37#1267                  | 232     | 20.717  | 0.017364185 | 0.026871126 | 1.55    | 0.027   |                                            |  |  |  |
| 9  | 1164CC37#1280                  | 155     | 20.807  | 0.959021648 | 2.757914432 | 2.88    | 0.145   |                                            |  |  |  |
| 10 | 1164CC37#1378                  | 301     | 21.835  | 0.067977578 | 0.644816847 | 9.49    | 0.078   |                                            |  |  |  |
| 11 | 1164CC37#1378                  | 227     | 21.835  | 0.165684610 | 1.476632503 | 8.91    | 0.063   |                                            |  |  |  |
| 12 | 1164CC37#1378                  | 344     | 21.835  | 0.084981801 | 0.833661460 | 9.81    | 0.070   |                                            |  |  |  |
| 13 | 1164CC37#1705#glutamine 3      | 156     | 25.296  | 2.914964765 | 3.035971038 | 1.04    | 0.895   |                                            |  |  |  |
| 14 | 1164CC37#1705#glutamine 3      | 245     | 25.296  | 1.169281913 | 5.392526448 | 4.61    | 0.002   |                                            |  |  |  |
| 15 | 1164CC37#1965                  | 204     | 28.073  | 1.859891177 | 1.922839230 | 1.03    | 0.739   |                                            |  |  |  |
| 16 | 1194BK05#2052#ornithine 4      | 420     | 25.990  | 0.065138516 | 0.017590845 | 0.27    | 0.020   |                                            |  |  |  |
| 17 | 1194BK05#2052#ornithine 4      | 142     | 25.990  | 1.305234483 | 0.347635106 | 0.27    | 0.017   |                                            |  |  |  |
| 18 | 1194BK05#2052#ornithine 4      | 174     | 25.990  | 0.654811591 | 0.180576073 | 0.28    | 0.013   |                                            |  |  |  |
| 19 | 1194BK09#2389#glutamine 4      | 227     | 28.996  | 0.106710181 | 0.720738740 | 6.75    | 0.082   |                                            |  |  |  |
| 20 | 1194BK09#2389#glutamine 4      | 317     | 28.996  | 0.026530976 | 0.183788403 | 6.93    | 0.077   |                                            |  |  |  |
| 21 | 1194BK09#2389#glutamine 4      | 156     | 28.996  | 0.028450066 | 0.189813325 | 6.67    | 0.082   |                                            |  |  |  |
| 22 | 1194BK11#1453#t-4-HO-proline   | 230     | 20.567  | 0.545653427 | 1.954714049 | 3.58    | 0.003   |                                            |  |  |  |
| 23 | 1194BK11#1453#t-4-HO-proline   | 140     | 20.567  | 0.129977570 | 0.438264958 | 3.37    | 0.003   |                                            |  |  |  |
| 24 | 1194BK11#1453#t-4-HO-proline   | 304     | 20.567  | 0.000315966 | 0.000325933 | 1.03    | 0.769   |                                            |  |  |  |
| 25 | 1194BK15#1922#arginine 3       | 174     | 24.834  | 0.354151525 | 0.023662779 | 0.07    | 0.016   |                                            |  |  |  |
| 26 | 1194BK15#1922#ornithine 3      | 174     | 24.834  | 0.354151525 | 0.020024640 | 0.06    | 0.015   |                                            |  |  |  |
| 27 | 1194BK15#1922#ornithine 3      | 186     | 24.834  | 0.109608325 | 0.003524251 | 0.03    | 0.004   |                                            |  |  |  |
| 28 | 1194BK15#1922#ornithine 3      | 348     | 24.834  | 0.026951942 | 0.000845613 | 0.03    | 0.010   |                                            |  |  |  |
| 29 | 1194BK15#2050#arginine 4       | 142     | 25.990  | 1.305234483 | 0.347635106 | 0.27    | 0.017   |                                            |  |  |  |
| 30 | 1194BK20#2225#gal MX2          | 160     | 27.625  | 0.015589102 | 2.263328893 | 145.19  | 0.001   |                                            |  |  |  |
| 31 | 1215BK02#1748#arabinose MX     | 217     | 23.253  | 0.052930628 | 0.046722848 | 0.88    | 0.397   |                                            |  |  |  |
| 32 | 1215BK02#1748#arabinose MX     | 307     | 23.253  | 0.027829856 | 0.024096838 | 0.87    | 0.380   |                                            |  |  |  |
| 33 | 1215BK02#1753#arabinose MX     | 160     | 23.253  | 0.014097364 | 0.011757427 | 0.83    | 0.196   |                                            |  |  |  |
| 34 | 1215BK03#1782#ribose MX        | 217     | 23.568  | 0.033446689 | 0.041959154 | 1.25    | 0.316   |                                            |  |  |  |
| 35 | 1215BK04#1717#xylose MX1       | 307     | 22.988  | 0.005543049 | 0.004808829 | 0.87    | 0.409   |                                            |  |  |  |
| 36 | 1215BK04#1717#xylose MX1       | 160     | 22.988  | 0.001953596 | 0.001664173 | 0.85    | 0.229   |                                            |  |  |  |
| 37 | 1215BK04#1738#xylose MX2       | 160     | 23.178  | 0.014043155 | 0.011757427 | 0.84    | 0.208   |                                            |  |  |  |
| 38 | 1215BK05#3504#maltose MX1      | 480     | 39.300  | 0.000679184 | 0.000456942 | 0.67    | 0.149   |                                            |  |  |  |
| 39 | 1215BK05#3540#maltose MX2      | 204     | 39.594  | 0.025075134 | 0.011490578 | 0.46    | 0.010   |                                            |  |  |  |
| 40 | 1215BK07#1896#fucose MX1       | 160     | 24.395  | 0.018928523 | 0.015801852 | 0.83    | 0.106   |                                            |  |  |  |
| 41 | 1215BK07#1896#fucose MX1       | 160     | 24.395  | 0.018928523 | 0.015801852 | 0.83    | 0.106   |                                            |  |  |  |
| 42 | 1215BK07#1896#fucose MX2       | 160     | 24.595  | 0.003750928 | 0.003583129 | 0.96    | 0.717   |                                            |  |  |  |
| 43 | 1215BK07#1896#fucose MX2       | 117     | 24.595  | 0.042284508 | 0.034269731 | 0.81    | 0.109   |                                            |  |  |  |
| 44 | 1215BK09#2256#mannitol         | 319     | 27.889  | 0.545002121 | 0.017152254 | 0.03    | 0.397   |                                            |  |  |  |
| 45 | 1215BK09#2256#mannitol         | 307     | 27.889  | 0.023614841 | 0.001546304 | 0.07    | 0.392   |                                            |  |  |  |
| 46 | 1215BK09#2256#mannitol         | 421     | 27.889  | 0.000405399 | 0.000366980 | 0.91    | 0.855   |                                            |  |  |  |
| 47 | 1215BK11#1416#erythritol       | 205     | 20.277  | 0.014933077 | 0.014183130 | 0.95    | 0.580   |                                            |  |  |  |
| 48 | 1215BK11#1416#erythritol       | 320     | 20.277  | 0.001345012 | 0.001193698 | 0.89    | 0.332   |                                            |  |  |  |
| 49 | 1215BK11#1416#erythritol       | 293     | 20.277  | 0.002302663 | 0.002108774 | 0.92    | 0.372   |                                            |  |  |  |
| 50 | 1215BK12#2269#sorbitol         | 319     | 28.002  | 0.008903460 | 0.017152254 | 1.93    | 0.001   |                                            |  |  |  |
| 51 | 1215BK12#2269#sorbitol         | 307     | 28.002  | 0.001176704 | 0.001249896 | 1.06    | 0.731   |                                            |  |  |  |
| 52 | 1215BK12#2269#sorbitol         | 419     | 28.002  | 0.000211945 | 0.000277151 | 1.31    | 0.543   |                                            |  |  |  |
| 53 | 1215BK13#2273#galactitol       | 307     | 28.086  | 0.003814727 | 0.003974291 | 1.04    | 0.791   |                                            |  |  |  |
| 54 | 1215BK13#2273#galactitol       | 421     | 28.086  | 0.000132336 | 0.000204616 | 1.55    | 0.382   |                                            |  |  |  |
| 55 | 1215BK13#2273#galactitol       | 331     | 28.086  | 0.004664809 | 0.004916544 | 1.05    | 0.713   |                                            |  |  |  |
| 56 | 1215BK14#1835#xylitol          | 307     | 24.083  | 0.000630330 | 0.000582511 | 0.92    | 0.501   |                                            |  |  |  |



|     |                                |     |        |             |             |       |       |
|-----|--------------------------------|-----|--------|-------------|-------------|-------|-------|
| 57  | 1215BK14#1835#xylitol          | 319 | 24.083 | 0.007223121 | 0.012152493 | 1.68  | 0.533 |
| 58  | 1215BK15#3625#maltitol         | 191 | 40.453 | 0.001949674 | 0.002720510 | 1.40  | 0.014 |
| 59  | 1215BK15#3625#maltitol         | 361 | 40.453 | 0.005554514 | 0.008687128 | 1.56  | 0.026 |
| 60  | 1215BK16#1857#rhamnose MX1     | 364 | 24.249 | 0.000329401 | 0.000506066 | 1.54  | 0.170 |
| 61  | 1215BK16#1867#rhamnose MX2     | 117 | 24.348 | 0.724199246 | 0.658282989 | 0.91  | 0.126 |
| 62  | 1215BK16#1867#rhamnose MX2     | 160 | 24.348 | 0.019069615 | 0.015801852 | 0.83  | 0.100 |
| 63  | 1215BK22#1328#citramalic       | 349 | 19.462 | 0.000187819 | 0.000105692 | 0.56  | 0.026 |
| 64  | 1215BK22#1328#citramalic       | 247 | 19.462 | 0.002536483 | 0.001297769 | 0.51  | 0.010 |
| 65  | 1215BK38#1269#homoserine 3     | 218 | 19.050 | 0.003872107 | 0.004229307 | 1.09  | 0.469 |
| 66  | 1215BK38#1269#homoserine 3     | 292 | 19.050 | 0.000124758 | 0.000144395 | 1.16  | 0.573 |
| 67  | 1215BK38#1557#a-kt-glutaric MX | 198 | 21.703 | 0.013487051 | 0.013243614 | 0.98  | 0.868 |
| 68  | 1215BK38#1557#a-kt-glutaric MX | 288 | 21.703 | 0.004062671 | 0.004729127 | 1.16  | 0.237 |
| 69  | 1215BK38#1557#a-kt-glutaric MX | 304 | 21.703 | 0.003574806 | 0.003753112 | 1.05  | 0.790 |
| 70  | 1215BK38#1724#homocysteine 3   | 234 | 23.251 | 0.003252704 | 0.003855718 | 1.19  | 0.305 |
| 71  | 1215BK38#1724#homocysteine 3   | 351 | 23.251 | 0.000148226 | 0.000181509 | 1.22  | 0.828 |
| 72  | 1215BK38#1724#homocysteine 3   | 261 | 23.251 | 0.000406860 | 0.000216588 | 0.53  | 0.076 |
| 73  | 1215BK38#2153#gal MX1          | 160 | 27.304 | 0.098805256 | 0.142727802 | 1.44  | 0.027 |
| 74  | 1215BK38#2153#gal MX1          | 319 | 27.304 | 0.217489270 | 0.316083438 | 1.45  | 0.022 |
| 75  | 1215BK38#2153#gal MX1          | 205 | 27.304 | 0.235250262 | 0.362163094 | 1.54  | 0.012 |
| 76  | 1215BK38#2207#c-ferulic        | 293 | 27.793 | 0.000656089 | 0.000688768 | 1.05  | 0.800 |
| 77  | 1215BK38#2207#c-ferulic        | 249 | 27.793 | 0.000797308 | 0.000755366 | 0.95  | 0.797 |
| 78  | 1215BK38#2207#c-ferulic        | 338 | 27.793 | 0.000344119 | 0.000449595 | 1.31  | 0.173 |
| 79  | 1215BK38#2439#c-sinapic        | 338 | 30.024 | 0.020869183 | 0.017748015 | 0.85  | 0.473 |
| 80  | 1215BK38#2439#c-sinapic        | 368 | 30.024 | 0.019600778 | 0.017157512 | 0.88  | 0.577 |
| 81  | 1215BK38#2439#c-sinapic        | 323 | 29.907 | 0.007042474 | 0.005775456 | 0.82  | 0.315 |
| 82  | 1219BK04#2184#galactonic-1,4-L | 334 | 27.254 | 0.071395160 | 0.026804973 | 0.38  | 0.392 |
| 83  | 1219BK04#2184#galactonic-1,4-L | 361 | 27.254 | 0.006180005 | 0.010989070 | 1.78  | 0.168 |
| 84  | 1219BK04#2184#galactonic-1,4-L | 466 | 27.254 | 0.001701947 | 0.092107337 | 54.12 | 0.069 |
| 85  | 1219BK05#2185#a-kt-gulonic MX  | 349 | 27.346 | 0.001003019 | 0.006696637 | 6.68  | 0.000 |
| 86  | 1219BK05#2185#a-kt-gulonic MX  | 186 | 27.346 | 0.077870044 | 0.036472667 | 0.47  | 0.126 |
| 87  | 1219BK07#2218#gulonic-1,4-L    | 333 | 27.850 | 0.006445776 | 0.009751132 | 1.51  | 0.101 |
| 88  | 1219BK07#2218#gulonic-1,4-L    | 466 | 27.850 | 0.000147510 | 0.001609787 | 10.91 | 0.385 |
| 89  | 1219BK07#2218#gulonic-1,4-L    | 243 | 27.850 | 0.024169137 | 0.022166668 | 0.92  | 0.880 |
| 90  | 1248BK08#0805                  | 117 | 14.496 | 0.010919115 | 0.008309193 | 0.76  | 0.072 |
| 91  | 1248BK08#0815#benzoic          | 179 | 14.591 | 0.018388201 | 0.015376591 | 0.84  | 0.415 |
| 92  | 1248BK08#0815#benzoic          | 105 | 14.591 | 0.015386065 | 0.012076738 | 0.78  | 0.442 |
| 93  | 1248BK08#0856#urea             | 189 | 14.931 | 0.011173204 | 0.022690246 | 2.03  | 0.000 |
| 94  | 1248BK08#0931#threonine 2      | 219 | 15.643 | 0.107297879 | 0.118302283 | 1.10  | 0.289 |
| 95  | 1248BK08#0931#threonine 2      | 117 | 15.643 | 0.345877566 | 0.381023001 | 1.10  | 0.290 |
| 96  | 1248BK08#0953#glycine 3        | 174 | 15.840 | 0.172769565 | 0.209348741 | 1.21  | 0.082 |
| 97  | 1248BK08#0953#glycine 3        | 248 | 15.840 | 0.024635974 | 0.030357718 | 1.23  | 0.065 |
| 98  | 1248BK08#0990                  | 306 | 16.178 | 0.000067246 | 0.000070423 | 1.05  | 0.937 |
| 99  | 1248BK08#1020                  | 184 | 16.441 | 0.034996544 | 0.030709529 | 0.88  | 0.414 |
| 100 | 1248BK08#1020                  | 285 | 16.441 | 0.011349208 | 0.009809039 | 0.86  | 0.428 |
| 101 | 1248BK08#1043#uracil 2         | 241 | 16.639 | 0.002226101 | 0.001587637 | 0.71  | 0.350 |
| 102 | 1248BK08#1056                  | 259 | 16.761 | 0.000495044 | 0.000165211 | 0.33  | 0.313 |
| 103 | 1248BK08#1107#thymine 2        | 255 | 17.231 | 0.000592701 | 0.000482105 | 0.81  | 0.163 |
| 104 | 1248BK08#1121                  | 257 | 17.348 | 0.000061782 | 0.000069093 | 1.12  | 0.652 |
| 105 | 1248BK08#1128                  | 141 | 17.420 | 0.015738486 | 0.018502051 | 1.18  | 0.579 |
| 106 | 1248BK08#1180                  | 142 | 17.888 | 0.001934312 | 0.005599586 | 2.89  | 0.000 |
| 107 | 1248BK08#1196                  | 259 | 18.041 | 0.000269480 | 0.000488453 | 1.81  | 0.220 |
| 108 | 1248BK08#1214                  | 242 | 18.194 | 0.000062519 | 0.000062596 | 1.00  | 0.998 |
| 109 | 1248BK08#1214                  | 234 | 18.194 | 0.006091845 | 0.017771389 | 2.92  | 0.355 |
| 110 | 1248BK08#1225                  | 104 | 18.293 | 0.003834726 | 0.002927622 | 0.76  | 0.171 |
| 111 | 1248BK08#1249#b-alanine 3      | 248 | 18.526 | 0.015671342 | 0.060597742 | 3.87  | 0.000 |
| 112 | 1248BK08#1249#b-alanine 3      | 290 | 18.526 | 0.003904965 | 0.015265273 | 3.91  | 0.000 |
| 113 | 1248BK08#1249#b-alanine 3      | 174 | 18.526 | 0.025425532 | 0.087981389 | 3.46  | 0.000 |
| 114 | 1248BK08#1308#homoserine 3     | 128 | 19.050 | 0.001203996 | 0.001486493 | 1.23  | 0.182 |
| 115 | 1248BK08#1340                  | 255 | 19.313 | 0.002246236 | 0.002021065 | 0.90  | 0.750 |
| 116 | 1248BK08#1368                  | 155 | 19.569 | 0.127859410 | 0.736428967 | 5.76  | 0.004 |
| 117 | 1248BK08#1368                  | 229 | 19.565 | 0.006902937 | 0.039302726 | 5.69  | 0.003 |
| 118 | 1248BK08#1446                  | 306 | 20.299 | 0.000380174 | 0.001767305 | 4.65  | 0.218 |
| 119 | 1248BK08#1463#methionine 2     | 176 | 20.453 | 0.009739183 | 0.007289239 | 0.75  | 0.204 |

|     |                              |     |        |             |             |        |       |
|-----|------------------------------|-----|--------|-------------|-------------|--------|-------|
| 120 | 1248BK08#1463#methionine 2   | 128 | 20.453 | 0.007598339 | 0.010794952 | 1.42   | 0.362 |
| 121 | 1248BK08#1527                | 120 | 21.054 | 0.027920239 | 0.016905018 | 0.61   | 0.114 |
| 122 | 1248BK08#1540#cysteine 3     | 294 | 21.171 | 0.000199359 | 0.000090207 | 0.45   | 0.006 |
| 123 | 1248BK08#1540#cysteine 3     | 220 | 21.171 | 0.004509640 | 0.002069240 | 0.46   | 0.017 |
| 124 | 1248BK08#1568                | 162 | 21.424 | 0.008380202 | 0.013883441 | 1.66   | 0.017 |
| 125 | 1248BK08#1568                | 218 | 21.424 | 0.019195113 | 0.031564312 | 1.64   | 0.018 |
| 126 | 1248BK08#1630                | 188 | 21.984 | 0.071598273 | 0.193675257 | 2.71   | 0.213 |
| 127 | 1248BK08#1641                | 305 | 22.084 | 0.021344488 | 0.049509367 | 2.32   | 0.021 |
| 128 | 1248BK08#1669                | 142 | 22.339 | 0.128760005 | 0.023604367 | 0.18   | 0.002 |
| 129 | 1248BK08#1669                | 348 | 22.339 | 0.009604770 | 0.001888827 | 0.20   | 0.003 |
| 130 | 1248BK08#1695                | 188 | 22.592 | 0.004658222 | 0.026762370 | 5.75   | 0.068 |
| 131 | 1248BK08#1695                | 216 | 22.592 | 0.004836380 | 0.009205925 | 1.90   | 0.133 |
| 132 | 1248BK08#1841                | 275 | 23.932 | 0.113096235 | 0.842104726 | 7.45   | 0.000 |
| 133 | 1248BK08#1852                | 173 | 24.032 | 0.183441729 | 0.534601117 | 2.91   | 0.007 |
| 134 | 1248BK08#1888                | 156 | 24.340 | 0.007513706 | 0.000356469 | 0.05   | 0.075 |
| 135 | 1248BK08#1907                | 227 | 24.517 | 0.006410030 | 1.238255669 | 193.17 | 0.022 |
| 136 | 1248BK08#1907                | 203 | 24.517 | 0.004602588 | 0.990063773 | 215.11 | 0.025 |
| 137 | 1248BK08#1907                | 317 | 24.517 | 0.002205389 | 0.359288161 | 162.91 | 0.027 |
| 138 | 1248BK08#1940                | 216 | 24.844 | 0.009073810 | 0.002935439 | 0.32   | 0.298 |
| 139 | 1248BK08#1948                | 216 | 24.919 | 0.000449746 | 0.001127328 | 2.51   | 0.018 |
| 140 | 1248BK08#1969                | 333 | 25.113 | 0.006002617 | 0.006917681 | 1.15   | 0.116 |
| 141 | 1248BK08#1969                | 292 | 25.113 | 0.030303769 | 0.034546711 | 1.14   | 0.237 |
| 142 | 1248BK08#2056                | 461 | 25.911 | 0.000056506 | 0.000050064 | 0.89   | 0.804 |
| 143 | 1248BK08#2056                | 371 | 25.911 | 0.000186673 | 0.000102743 | 0.55   | 0.513 |
| 144 | 1248BK08#2056                | 257 | 25.911 | 0.002454204 | 0.006897696 | 2.81   | 0.172 |
| 145 | 1248BK08#2264#lysine 4       | 156 | 27.765 | 0.094890362 | 0.104672558 | 1.10   | 0.571 |
| 146 | 1248BK08#2264#lysine 4       | 317 | 27.765 | 0.051112309 | 0.056073965 | 1.10   | 0.628 |
| 147 | 1248BK08#2264#lysine 4       | 174 | 27.765 | 0.141688463 | 0.150541758 | 1.06   | 0.719 |
| 148 | 1248BK08#2323                | 217 | 28.410 | 0.038881149 | 0.071021753 | 1.83   | 0.193 |
| 149 | 1248BK08#2323                | 361 | 28.410 | 0.009932521 | 0.019124111 | 1.93   | 0.207 |
| 150 | 1248BK08#2406#saccharic      | 333 | 29.208 | 0.003233797 | 0.004385836 | 1.36   | 0.019 |
| 151 | 1248BK08#2411                | 433 | 29.287 | 0.000568859 | 0.000722959 | 1.27   | 0.047 |
| 152 | 1248BK08#2411                | 205 | 29.287 | 0.002901222 | 0.004321519 | 1.49   | 0.001 |
| 153 | 1248BK08#2429                | 393 | 29.460 | 0.005957445 | 0.002861476 | 0.48   | 0.012 |
| 154 | 1248BK08#2495                | 204 | 30.096 | 0.000807146 | 0.004438155 | 5.50   | 0.200 |
| 155 | 1248BK08#2495                | 539 | 30.096 | 0.000031969 | 0.000022342 | 0.70   | 0.172 |
| 156 | 1248BK08#2495                | 333 | 29.751 | 0.013352652 | 0.011134918 | 0.83   | 0.159 |
| 157 | 1248BK08#2568                | 245 | 30.794 | 0.000471055 | 0.000046857 | 0.10   | 0.062 |
| 158 | 1248BK08#2568                | 257 | 30.794 | 0.000312080 | 0.001002898 | 3.21   | 0.067 |
| 159 | 1248BK08#2568                | 292 | 30.794 | 0.000202789 | 0.000144355 | 0.71   | 0.691 |
| 160 | 1248BK08#2588                | 228 | 30.986 | 0.000321896 | 0.000203553 | 0.63   | 0.365 |
| 161 | 1248BK08#2664                | 437 | 31.721 | 0.000106273 | 0.000174507 | 1.64   | 0.207 |
| 162 | 1248BK08#2720#9,12(Z,Z)-18:2 | 337 | 32.269 | 0.000094344 | 0.000126983 | 1.35   | 0.378 |
| 163 | 1248BK08#2771                | 373 | 32.768 | 0.000090011 | 0.000113480 | 1.26   | 0.265 |
| 164 | 1248BK08#2796                | 373 | 33.013 | 0.000064015 | 0.000075640 | 1.18   | 0.579 |
| 165 | 1248BK08#2876                | 337 | 33.808 | 0.031952109 | 0.015910067 | 0.50   | 0.041 |
| 166 | 1248BK08#2876                | 217 | 33.820 | 0.058613742 | 0.030623439 | 0.52   | 0.023 |
| 167 | 1248BK08#2876                | 361 | 33.820 | 0.008791152 | 0.005044432 | 0.57   | 0.054 |
| 168 | 1248BK08#2949                | 433 | 34.530 | 0.000137469 | 0.000343144 | 2.50   | 0.018 |
| 169 | 1248BK08#2983                | 387 | 34.866 | 0.000049476 | 0.000072211 | 1.46   | 0.086 |
| 170 | 1248BK08#2983                | 299 | 34.866 | 0.000295087 | 0.000308569 | 1.05   | 0.923 |
| 171 | 1248BK08#3000                | 289 | 35.048 | 0.000112181 | 0.000126652 | 1.13   | 0.547 |
| 172 | 1248BK08#3018                | 334 | 35.216 | 0.000072467 | 0.000210625 | 2.91   | 0.009 |
| 173 | 1248BK08#3036                | 289 | 35.396 | 0.000074138 | 0.000073480 | 0.99   | 0.972 |
| 174 | 1248BK08#3036                | 334 | 35.396 | 0.000049858 | 0.000276294 | 5.54   | 0.008 |
| 175 | 1248BK08#3086                | 401 | 35.894 | 0.000056087 | 0.000050843 | 0.91   | 0.789 |
| 176 | 1248BK08#3086                | 437 | 35.894 | 0.000038151 | 0.000058525 | 1.53   | 0.218 |
| 177 | 1248BK08#3103                | 260 | 36.064 | 0.000130491 | 0.000120894 | 0.93   | 0.818 |
| 178 | 1248BK08#3131                | 446 | 36.344 | 0.000976392 | 0.005822267 | 5.96   | 0.011 |
| 179 | 1248BK08#3177                | 313 | 36.806 | 0.000093697 | 0.000867808 | 9.26   | 0.016 |
| 180 | 1248BK08#3192                | 387 | 36.957 | 0.000088977 | 0.000435703 | 4.90   | 0.108 |
| 181 | 1248BK08#3192                | 299 | 36.957 | 0.000093175 | 0.000421832 | 4.53   | 0.277 |
| 182 | 1248BK08#3192                | 471 | 36.957 | 0.000025360 | 0.000071514 | 2.82   | 0.134 |

|     |                         |     |        |             |             |       |       |
|-----|-------------------------|-----|--------|-------------|-------------|-------|-------|
| 183 | 1248BK08#3196           | 324 | 37.007 | 0.000072758 | 0.000619526 | 8.51  | 0.005 |
| 184 | 1248BK08#3223           | 287 | 37.271 | 0.000039305 | 0.000153842 | 3.91  | 0.261 |
| 185 | 1248BK08#3233           | 401 | 37.373 | 0.000043649 | 0.000075110 | 1.72  | 0.292 |
| 186 | 1248BK08#3359           | 491 | 38.628 | 0.000029956 | 0.000023735 | 0.79  | 0.608 |
| 187 | 1248BK08#3365           | 480 | 38.701 | 0.000103224 | 0.000144722 | 1.40  | 0.060 |
| 188 | 1248BK08#3365           | 307 | 38.701 | 0.000309414 | 0.000532140 | 1.72  | 0.019 |
| 189 | 1248BK08#3383           | 307 | 38.885 | 0.000315692 | 0.001201755 | 3.81  | 0.046 |
| 190 | 1248BK08#3385           | 295 | 38.914 | 0.001040383 | 0.000815235 | 0.78  | 0.485 |
| 191 | 1248BK08#3405           | 322 | 39.118 | 0.000151936 | 0.000176038 | 1.16  | 0.444 |
| 192 | 1248BK08#3412           | 473 | 39.178 | 0.000016403 | 0.000029663 | 1.81  | 0.259 |
| 193 | 1248BK08#3447           | 437 | 39.532 | 0.000706572 | 0.001346829 | 1.91  | 0.003 |
| 194 | 1248BK08#3456           | 361 | 39.623 | 0.005174137 | 0.004377432 | 0.85  | 0.552 |
| 195 | 1248BK08#3463           | 288 | 39.693 | 0.000053353 | 0.000056513 | 1.06  | 0.886 |
| 196 | 1248BK08#3468           | 437 | 39.743 | 0.000070951 | 0.000118461 | 1.67  | 0.611 |
| 197 | 1248BK08#3479           | 437 | 39.855 | 0.000083937 | 0.000239944 | 2.86  | 0.055 |
| 198 | 1248BK08#3581           | 539 | 40.856 | 0.000022083 | 0.000036485 | 1.65  | 0.155 |
| 199 | 1248BK08#3589           | 396 | 40.937 | 0.000027847 | 0.000018967 | 0.68  | 0.401 |
| 200 | 1248BK08#3589           | 361 | 40.937 | 0.000905377 | 0.004763069 | 5.26  | 0.001 |
| 201 | 1248BK08#3606           | 285 | 41.112 | 0.000072317 | 0.000081501 | 1.13  | 0.681 |
| 202 | 1248BK08#3627           | 296 | 41.303 | 0.000448831 | 0.000372388 | 0.83  | 0.278 |
| 203 | 1248BK08#3643           | 479 | 41.457 | 0.000021777 | 0.000014981 | 0.69  | 0.424 |
| 204 | 1248BK08#3773           | 446 | 42.694 | 0.000019585 | 0.000022679 | 1.16  | 0.780 |
| 205 | 1248BK08#3773           | 229 | 42.694 | 0.005368013 | 0.019179260 | 3.57  | 0.005 |
| 206 | 1248BK08#4003           | 259 | 44.854 | 0.001174406 | 0.000092358 | 0.08  | 0.068 |
| 207 | 1248BK08#4172#raffinose | 437 | 46.417 | 0.006753373 | 0.020242053 | 3.00  | 0.003 |
| 208 | 1248BK08#4172#raffinose | 451 | 46.417 | 0.002152938 | 0.010878263 | 5.05  | 0.009 |
| 209 | 1248BK08#4172#raffinose | 361 | 46.417 | 0.036362441 | 0.103046840 | 2.83  | 0.005 |
| 210 | 1248BK08#4180           | 437 | 46.509 | 0.006760149 | 0.020245887 | 2.99  | 0.003 |
| 211 | 1248BK08#4180           | 204 | 46.509 | 0.018176257 | 0.043884301 | 2.41  | 0.056 |
| 212 | 1248BK08#4180           | 217 | 46.509 | 0.028390682 | 0.060366267 | 2.13  | 0.084 |
| 213 | 1248BK08#4186           | 451 | 46.633 | 0.002976145 | 0.010894764 | 3.66  | 0.009 |
| 214 | 1250BK34#0703#dodecane  | 85  | 13.194 | 1.301977437 | 1.191703210 | 0.92  | 0.269 |
| 215 | 1263BK24#0843           | 174 | 14.907 | 1.684420921 | 0.837018179 | 0.50  | 0.008 |
| 216 | 1263BK24#0864#leucine 2 | 158 | 15.095 | 0.056504440 | 0.057563290 | 1.02  | 0.863 |
| 217 | 1263BK24#0864#leucine 2 | 232 | 15.095 | 0.002118496 | 0.002069892 | 0.98  | 0.842 |
| 218 | 1263BK24#0874#glycerol  | 117 | 15.184 | 0.060545252 | 0.046962237 | 0.78  | 0.180 |
| 219 | 1263BK24#0874#glycerol  | 205 | 15.184 | 0.092743621 | 0.097357343 | 1.05  | 0.910 |
| 220 | 1263BK24#0874#glycerol  | 218 | 15.184 | 0.031685486 | 0.029805112 | 0.94  | 0.751 |
| 221 | 1263BK24#0874#glycerol  | 293 | 15.184 | 0.002363243 | 0.002320850 | 0.98  | 0.920 |
| 222 | 1263BK24#0960           | 174 | 15.965 | 2.929400333 | 3.322458537 | 1.13  | 0.222 |
| 223 | 1263BK24#1089           | 156 | 17.123 | 0.000676032 | 0.001471808 | 2.18  | 0.026 |
| 224 | 1263BK24#1089           | 215 | 17.123 | 0.003020630 | 0.000390705 | 0.13  | 0.127 |
| 225 | 1263BK24#1215           | 219 | 18.264 | 0.004361538 | 0.006048977 | 1.39  | 0.025 |
| 226 | 1263BK24#1243           | 228 | 18.516 | 0.017501717 | 0.017386379 | 0.99  | 0.982 |
| 227 | 1263BK24#1446           | 188 | 20.361 | 0.003162682 | 0.002833775 | 0.90  | 0.536 |
| 228 | 1263BK24#1633           | 292 | 22.057 | 0.002219212 | 0.002398997 | 1.08  | 0.836 |
| 229 | 1263BK24#1633           | 117 | 22.057 | 0.000660575 | 0.007435803 | 11.26 | 0.368 |
| 230 | 1263BK24#1743           | 257 | 23.051 | 0.003939920 | 0.004003963 | 1.02  | 0.905 |
| 231 | 1263BK24#1785           | 150 | 23.426 | 0.000402111 | 0.002164481 | 5.38  | 0.001 |
| 232 | 1263BK24#1785           | 272 | 23.426 | 0.004490764 | 0.023669526 | 5.27  | 0.000 |
| 233 | 1263BK24#1861           | 303 | 24.109 | 0.004619866 | 0.003580939 | 0.78  | 0.268 |
| 234 | 1263BK24#1907           | 357 | 24.532 | 0.000340079 | 0.000543076 | 1.60  | 0.155 |
| 235 | 1263BK24#1910           | 416 | 24.554 | 0.006991372 | 0.013705648 | 1.96  | 0.050 |
| 236 | 1263BK24#1994           | 133 | 25.314 | 0.140379917 | 0.124497646 | 0.89  | 0.218 |
| 237 | 1263BK24#2004           | 244 | 25.433 | 0.003088842 | 0.005630518 | 1.82  | 0.317 |
| 238 | 1263BK24#2026           | 194 | 25.595 | 0.001470658 | 0.001466016 | 1.00  | 0.981 |
| 239 | 1263BK24#2047           | 437 | 25.800 | 0.001532177 | 0.003069910 | 2.00  | 0.237 |
| 240 | 1263BK24#2063           | 345 | 25.931 | 0.001811986 | 0.001951431 | 1.08  | 0.874 |
| 241 | 1263BK24#2063           | 435 | 25.931 | 0.001607920 | 0.002293115 | 1.43  | 0.309 |
| 242 | 1263BK24#2154           | 144 | 26.771 | 0.001175375 | 0.002145337 | 1.83  | 0.016 |
| 243 | 1263BK24#2154           | 307 | 26.771 | 0.002262316 | 0.000376016 | 0.17  | 0.121 |
| 244 | 1263BK24#2269           | 234 | 27.828 | 0.006785629 | 0.007413093 | 1.09  | 0.796 |
| 245 | 1263BK24#2295#tyrosine  | 218 | 28.072 | 0.153194603 | 0.187069505 | 1.22  | 0.156 |

|     |                               |     |        |             |             |      |       |
|-----|-------------------------------|-----|--------|-------------|-------------|------|-------|
| 246 | 1263BK24#2295#tyrosine        | 280 | 28.072 | 0.010012695 | 0.013765989 | 1.37 | 0.113 |
| 247 | 1263BK24#2476                 | 319 | 29.726 | 0.075241000 | 0.000279565 | 0.00 | 0.198 |
| 248 | 1263BK24#2679                 | 300 | 31.578 | 0.000096124 | 0.000115824 | 1.20 | 0.594 |
| 249 | 1263BK24#2679                 | 228 | 31.578 | 0.000115634 | 0.000077440 | 0.67 | 0.407 |
| 250 | 1263BK24#2697                 | 458 | 31.740 | 0.000024196 | 0.000028300 | 1.17 | 0.704 |
| 251 | 1263BK24#2727                 | 235 | 32.014 | 0.002659055 | 0.004465538 | 1.68 | 0.002 |
| 252 | 1263BK24#2772                 | 328 | 32.434 | 0.004100986 | 0.007613568 | 1.86 | 0.368 |
| 253 | 1263BK24#2814#spermidine      | 174 | 32.824 | 0.003710209 | 0.005549443 | 1.50 | 0.146 |
| 254 | 1263BK24#2814#spermidine      | 144 | 32.824 | 0.004267422 | 0.006376321 | 1.49 | 0.195 |
| 255 | 1263BK24#2994                 | 351 | 34.452 | 0.000119565 | 0.000260033 | 2.17 | 0.041 |
| 256 | 1263BK24#3026                 | 329 | 34.745 | 0.000090088 | 0.000064201 | 0.71 | 0.365 |
| 257 | 1263BK24#3026                 | 318 | 34.745 | 0.000376886 | 0.000140645 | 0.37 | 0.241 |
| 258 | 1263BK24#3069                 | 338 | 35.147 | 0.000112381 | 0.000171127 | 1.52 | 0.430 |
| 259 | 1263BK24#3069                 | 144 | 35.147 | 0.000221893 | 0.000418915 | 1.89 | 0.051 |
| 260 | 1263BK24#3137                 | 174 | 35.772 | 0.000324847 | 0.000373773 | 1.15 | 0.639 |
| 261 | 1263BK24#3155                 | 174 | 35.937 | 0.000165521 | 0.000420331 | 2.54 | 0.161 |
| 262 | 1263BK24#3155                 | 398 | 35.937 | 0.000031340 | 0.000041125 | 1.31 | 0.328 |
| 263 | 1263BK24#3171                 | 174 | 36.084 | 0.000127605 | 0.000405182 | 3.18 | 0.034 |
| 264 | 1263BK24#3472                 | 204 | 38.850 | 0.008843429 | 0.009342550 | 1.06 | 0.885 |
| 265 | 1263BK24#4315                 | 174 | 46.628 | 0.000126959 | 0.000188563 | 1.49 | 0.616 |
| 266 | 1263BK24#4440                 | 174 | 47.803 | 0.000137256 | 0.000094386 | 0.69 | 0.378 |
| 267 | 1263BK25#0632                 | 86  | 13.044 | 0.053599729 | 0.008372649 | 0.16 | 0.088 |
| 268 | 1263BK25#2215                 | 191 | 27.318 | 0.029940083 | 0.054620879 | 1.82 | 0.121 |
| 269 | 1263BK25#2215                 | 204 | 27.318 | 0.167866122 | 0.490235846 | 2.92 | 0.273 |
| 270 | 1263BK25#3658                 | 267 | 40.547 | 0.000122329 | 0.000114258 | 0.93 | 0.870 |
| 271 | 1263BK50#2309                 | 299 | 28.231 | 0.003568540 | 0.002914938 | 0.82 | 0.369 |
| 272 | 1263BK50#2309                 | 360 | 28.231 | 0.000558683 | 0.000407308 | 0.73 | 0.383 |
| 273 | 1263BK50#2309                 | 494 | 28.231 | 0.000091023 | 0.000067531 | 0.74 | 0.228 |
| 274 | 1267BK12#0266                 | 207 | 9.830  | 0.002413554 | 0.001634387 | 0.68 | 0.772 |
| 275 | 1267BK12#0266                 | 295 | 9.830  | 0.033084292 | 0.084621868 | 2.56 | 0.123 |
| 276 | 1267BK12#0289#lactic          | 117 | 10.035 | 0.000331660 | 0.000353679 | 1.07 | 0.935 |
| 277 | 1267BK12#0289#lactic          | 219 | 10.035 | 0.006093545 | 0.005520391 | 0.91 | 0.136 |
| 278 | 1267BK12#0326                 | 173 | 10.400 | 9.640947695 | 9.109659250 | 0.94 | 0.195 |
| 279 | 1267BK12#0362                 | 217 | 10.685 | 0.180300036 | 0.169503501 | 0.94 | 0.592 |
| 280 | 1267BK12#0362                 | 202 | 10.685 | 0.753366295 | 0.654058047 | 0.87 | 0.165 |
| 281 | 1267BK12#0403#alanine 2       | 116 | 11.052 | 0.030632098 | 0.065604505 | 2.14 | 0.129 |
| 282 | 1267BK12#0422#hydroxylamine   | 133 | 11.221 | 0.015929850 | 0.013946217 | 0.88 | 0.345 |
| 283 | 1267BK12#0422#hydroxylamine   | 249 | 11.221 | 0.642443234 | 0.626585075 | 0.98 | 0.819 |
| 284 | 1267BK12#0494#cy-siloxane 5   | 267 | 11.864 | 0.018509770 | 0.019944379 | 1.08 | 0.369 |
| 285 | 1267BK12#0503                 | 219 | 11.945 | 0.198027870 | 0.101870188 | 0.51 | 0.005 |
| 286 | 1267BK12#0503                 | 190 | 11.945 | 0.000163725 | 0.000066230 | 0.40 | 0.301 |
| 287 | 1267BK12#0516                 | 235 | 12.061 | 0.020061356 | 0.008208655 | 0.41 | 0.394 |
| 288 | 1267BK12#0531                 | 142 | 12.194 | 0.068693134 | 0.101293508 | 1.47 | 0.015 |
| 289 | 1267BK12#0531                 | 174 | 12.194 | 0.000780483 | 0.000314210 | 0.40 | 0.072 |
| 290 | 1267BK12#0616#me-phosphoric 2 | 241 | 12.963 | 0.022795562 | 0.036696100 | 1.61 | 0.062 |
| 291 | 1267BK12#0666#dodecane        | 85  | 13.402 | 1.307719370 | 1.193333367 | 0.91 | 0.262 |
| 292 | 1267BK12#0688                 | 233 | 13.600 | 0.000722487 | 0.000606200 | 0.84 | 0.475 |
| 293 | 1267BK12#0707#valine 2        | 144 | 13.770 | 0.164123528 | 0.231905656 | 1.41 | 0.005 |
| 294 | 1267BK12#0707#valine 2        | 218 | 13.770 | 0.026045805 | 0.036657810 | 1.41 | 0.007 |
| 295 | 1267BK12#0725                 | 156 | 13.931 | 0.002191448 | 0.004068944 | 1.86 | 0.158 |
| 296 | 1267BK12#0737#siloxane 5      | 281 | 14.039 | 0.013865427 | 0.012315691 | 0.89 | 0.256 |
| 297 | 1267BK12#0784                 | 248 | 14.459 | 0.023294965 | 0.018912362 | 0.81 | 0.204 |
| 298 | 1267BK12#0824#serine 2        | 116 | 14.818 | 1.101411051 | 1.885358423 | 1.71 | 0.005 |
| 299 | 1267BK12#0824#serine 2        | 132 | 14.818 | 1.150570230 | 2.070411061 | 1.80 | 0.001 |
| 300 | 1267BK12#0848                 | 415 | 15.033 | 0.000391275 | 0.000218848 | 0.56 | 0.388 |
| 301 | 1267BK12#0848                 | 261 | 15.033 | 0.000520154 | 0.000526608 | 1.01 | 0.990 |
| 302 | 1267BK12#0858#phosphoric 3    | 299 | 15.123 | 1.764855068 | 2.959829489 | 1.68 | 0.004 |
| 303 | 1267BK12#0858#phosphoric 3    | 314 | 15.123 | 0.310271050 | 0.865592650 | 2.79 | 0.000 |
| 304 | 1267BK12#0909#isoleucine 2    | 158 | 15.580 | 0.051347880 | 0.068453704 | 1.33 | 0.041 |
| 305 | 1267BK12#0909#isoleucine 2    | 218 | 15.580 | 0.008658956 | 0.011245493 | 1.30 | 0.025 |
| 306 | 1267BK12#0917#proline 2       | 216 | 15.643 | 0.000704614 | 0.000492063 | 0.70 | 0.309 |
| 307 | 1267BK12#0917#proline 2       | 142 | 15.643 | 0.016562411 | 0.015265404 | 0.92 | 0.638 |
| 308 | 1267BK12#0923#nicotinic       | 136 | 15.697 | 0.008255788 | 0.008352461 | 1.01 | 0.925 |

|     |                             |     |        |             |             |      |       |
|-----|-----------------------------|-----|--------|-------------|-------------|------|-------|
| 309 | 1267BK12#0923#nicotinic     | 180 | 15.697 | 0.013132678 | 0.012718395 | 0.97 | 0.749 |
| 310 | 1267BK12#0931#cy-siloxane 6 | 341 | 15.777 | 0.002073482 | 0.002149101 | 1.04 | 0.943 |
| 311 | 1267BK12#0945#maleic        | 245 | 15.903 | 0.005448292 | 0.003568649 | 0.66 | 0.002 |
| 312 | 1267BK12#0945#maleic        | 147 | 15.903 | 0.061916224 | 0.040782401 | 0.66 | 0.001 |
| 313 | 1267BK12#0970#d4-succinic   | 251 | 16.127 | 0.000097406 | 0.000101786 | 1.04 | 0.932 |
| 314 | 1267BK12#0970#d4-succinic   | 251 | 16.127 | 0.000092977 | 0.000107496 | 1.16 | 0.825 |
| 315 | 1267BK12#0970#succinic      | 147 | 16.127 | 0.124687951 | 0.077994276 | 0.63 | 0.007 |
| 316 | 1267BK12#0970#succinic      | 147 | 16.127 | 0.124630361 | 0.079557202 | 0.64 | 0.006 |
| 317 | 1267BK12#0970#succinic      | 247 | 16.127 | 0.012813899 | 0.007877377 | 0.61 | 0.012 |
| 318 | 1267BK12#0970#succinic      | 247 | 16.127 | 0.012811275 | 0.007877377 | 0.61 | 0.012 |
| 319 | 1267BK12#0970#succinic      | 247 | 16.127 | 0.012813899 | 0.007877377 | 0.61 | 0.012 |
| 320 | 1267BK12#0970#succinic      | 147 | 16.127 | 0.124687951 | 0.077994276 | 0.63 | 0.007 |
| 321 | 1267BK12#0998               | 261 | 16.379 | 0.000033803 | 0.000028575 | 0.85 | 0.592 |
| 322 | 1267BK12#0998               | 147 | 16.379 | 0.125735389 | 0.079557202 | 0.63 | 0.004 |
| 323 | 1267BK12#1009#glyceric      | 189 | 16.478 | 0.274345950 | 0.153998824 | 0.56 | 0.030 |
| 324 | 1267BK12#1009#glyceric      | 292 | 16.478 | 0.157952865 | 0.088301261 | 0.56 | 0.019 |
| 325 | 1267BK12#1059#fumaric       | 147 | 16.926 | 0.816157922 | 0.666586035 | 0.82 | 0.534 |
| 326 | 1267BK12#1059#fumaric       | 245 | 16.926 | 0.537653611 | 0.349675400 | 0.65 | 0.044 |
| 327 | 1267BK12#1067               | 188 | 16.998 | 0.149533270 | 0.128921893 | 0.86 | 0.715 |
| 328 | 1267BK12#1082#serine 3      | 218 | 17.133 | 0.339953866 | 0.674680471 | 1.98 | 0.003 |
| 329 | 1267BK12#1102               | 306 | 17.313 | 0.001331199 | 0.000942882 | 0.71 | 0.020 |
| 330 | 1267BK12#1102               | 233 | 17.313 | 0.001327808 | 0.001104479 | 0.83 | 0.189 |
| 331 | 1267BK12#1114               | 247 | 17.421 | 0.003833960 | 0.003521360 | 0.92 | 0.419 |
| 332 | 1267BK12#1143#threonine 3   | 219 | 17.681 | 0.089312435 | 0.120343765 | 1.35 | 0.055 |
| 333 | 1267BK12#1143#threonine 3   | 291 | 17.681 | 0.031369286 | 0.042550494 | 1.36 | 0.040 |
| 334 | 1267BK12#1164               | 191 | 17.869 | 0.001005273 | 0.000732921 | 0.73 | 0.152 |
| 335 | 1267BK12#1175               | 197 | 17.968 | 0.002747863 | 0.002379917 | 0.87 | 0.623 |
| 336 | 1267BK12#1195               | 174 | 18.149 | 0.013309707 | 0.027554710 | 2.07 | 0.000 |
| 337 | 1267BK12#1220               | 174 | 18.373 | 0.025647302 | 0.053233419 | 2.08 | 0.000 |
| 338 | 1267BK12#1237               | 160 | 18.526 | 0.257458196 | 0.175130122 | 0.68 | 0.040 |
| 339 | 1267BK12#1247               | 247 | 18.616 | 0.011767841 | 0.010618795 | 0.90 | 0.307 |
| 340 | 1267BK12#1270               | 172 | 18.832 | 0.000256109 | 0.000489980 | 1.91 | 0.065 |
| 341 | 1267BK12#1278               | 174 | 18.895 | 0.001949168 | 0.004452156 | 2.28 | 0.000 |
| 342 | 1267BK12#1278               | 168 | 18.895 | 0.001104617 | 0.002001269 | 1.81 | 0.009 |
| 343 | 1267BK12#1298               | 350 | 19.025 | 0.004829396 | 0.006761127 | 1.40 | 0.026 |
| 344 | 1267BK12#1303               | 174 | 19.120 | 0.035969438 | 0.058861413 | 1.64 | 0.006 |
| 345 | 1267BK12#1309               | 174 | 19.174 | 0.035969438 | 0.058861413 | 1.64 | 0.006 |
| 346 | 1267BK12#1334               | 281 | 19.454 | 0.013604208 | 0.010349855 | 0.76 | 0.060 |
| 347 | 1267BK12#1345               | 173 | 19.498 | 0.011170355 | 0.009072486 | 0.81 | 0.039 |
| 348 | 1267BK12#1345               | 103 | 19.498 | 0.025162303 | 0.021730651 | 0.86 | 0.077 |
| 349 | 1267BK12#1369               | 234 | 19.715 | 0.014875112 | 0.006780871 | 0.46 | 0.002 |
| 350 | 1267BK12#1390#malic         | 233 | 19.916 | 0.397139696 | 0.252368109 | 0.64 | 0.004 |
| 351 | 1267BK12#1390#malic         | 335 | 19.916 | 0.063054134 | 0.039640810 | 0.63 | 0.019 |
| 352 | 1267BK12#1406#pentadecane   | 85  | 20.057 | 1.988735697 | 1.968416578 | 0.99 | 0.880 |
| 353 | 1267BK12#1410               | 217 | 20.105 | 0.012129227 | 0.023409743 | 1.93 | 0.156 |
| 354 | 1267BK12#1410               | 293 | 20.105 | 0.001791732 | 0.001283775 | 0.72 | 0.143 |
| 355 | 1267BK12#1428               | 111 | 20.239 | 0.006084021 | 0.006537421 | 1.07 | 0.692 |
| 356 | 1267BK12#1428               | 275 | 20.239 | 0.001144623 | 0.000983429 | 0.86 | 0.431 |
| 357 | 1267BK12#1438               | 237 | 20.347 | 0.009131464 | 0.007942037 | 0.87 | 0.271 |
| 358 | 1267BK12#1457#aspartic 3    | 218 | 20.518 | 0.138413278 | 0.123743940 | 0.89 | 0.378 |
| 359 | 1267BK12#1457#aspartic 3    | 232 | 20.518 | 0.744992781 | 0.706949482 | 0.95 | 0.641 |
| 360 | 1267BK12#1457#aspartic 3    | 306 | 20.518 | 0.017733661 | 0.015653064 | 0.88 | 0.319 |
| 361 | 1267BK12#1457#pyroglutamic  | 156 | 20.518 | 4.386359762 | 4.106286075 | 0.94 | 0.884 |
| 362 | 1267BK12#1457#pyroglutamic  | 258 | 20.518 | 0.615864658 | 2.114101103 | 3.43 | 0.003 |
| 363 | 1267BK12#1457#pyroglutamic  | 230 | 20.518 | 0.542078617 | 1.965317151 | 3.63 | 0.002 |
| 364 | 1267BK12#1485               | 84  | 20.771 | 0.228456024 | 0.262412957 | 1.15 | 0.532 |
| 365 | 1267BK12#1492               | 263 | 20.834 | 0.137186738 | 0.130214827 | 0.95 | 0.517 |
| 366 | 1267BK12#1507               | 292 | 20.970 | 0.184710012 | 0.153227675 | 0.83 | 0.075 |
| 367 | 1267BK12#1520               | 249 | 21.069 | 0.000663012 | 0.000370557 | 0.56 | 0.141 |
| 368 | 1267BK12#1547#threonic      | 292 | 21.331 | 0.063835355 | 0.053287978 | 0.83 | 0.167 |
| 369 | 1267BK12#1547#threonic      | 220 | 21.331 | 0.039235069 | 0.033037308 | 0.84 | 0.189 |
| 370 | 1267BK12#1547#threonic      | 205 | 21.331 | 0.035531659 | 0.030225070 | 0.85 | 0.196 |
| 371 | 1267BK12#1569               | 160 | 21.529 | 0.001327877 | 0.001137298 | 0.86 | 0.449 |



|     |                               |     |        |             |             |      |         |
|-----|-------------------------------|-----|--------|-------------|-------------|------|---------|
| 372 | 1267BK12#1587                 | 205 | 21.701 | 0.014625457 | 0.005763956 | 0.39 | 0.001   |
| 373 | 1267BK12#1609                 | 71  | 21.891 | 0.103471882 | 0.066656040 | 0.64 | 0.013   |
| 374 | 1267BK12#1609                 | 250 | 21.891 | 0.000403291 | 0.000515784 | 1.28 | 0.222   |
| 375 | 1267BK12#1627                 | 342 | 22.043 | 0.002055910 | 0.002072003 | 1.01 | 0.934   |
| 376 | 1267BK12#1631#asparagine 4    | 188 | 22.088 | 0.121158524 | 0.257111275 | 2.12 | 0.027   |
| 377 | 1267BK12#1631#asparagine 4    | 216 | 22.088 | 0.087104606 | 0.183328240 | 2.10 | 0.037   |
| 378 | 1267BK12#1631#asparagine 4    | 231 | 22.088 | 0.021393786 | 0.027831521 | 1.30 | 0.132   |
| 379 | 1267BK12#1674#glutamic 3      | 246 | 22.477 | 0.964118165 | 0.776206194 | 0.81 | 0.370   |
| 380 | 1267BK12#1674#glutamic 3      | 363 | 22.477 | 0.025969211 | 0.020724111 | 0.80 | 0.363   |
| 381 | 1267BK12#1680#phenylalanine 2 | 192 | 22.532 | 0.038842146 | 0.039346181 | 1.01 | 0.879   |
| 382 | 1267BK12#1680#phenylalanine 2 | 266 | 22.532 | 0.003070598 | 0.003139230 | 1.02 | 0.798   |
| 383 | 1267BK12#1733                 | 245 | 23.010 | 0.006892670 | 0.005563849 | 0.81 | 0.094   |
| 384 | 1267BK12#1751#xylose MX2      | 307 | 23.173 | 0.027667535 | 0.024082354 | 0.87 | 0.390   |
| 385 | 1267BK12#1751#xylose MX2      | 217 | 23.173 | 0.051884846 | 0.046722848 | 0.90 | 0.499   |
| 386 | 1267BK12#1765#arabinose MX2   | 307 | 23.299 | 0.010561844 | 0.007054056 | 0.67 | 0.353   |
| 387 | 1267BK12#1765#arabinose MX2   | 160 | 23.299 | 0.008206212 | 0.004824354 | 0.59 | 0.486   |
| 388 | 1267BK12#1779#asparagine 3    | 116 | 23.426 | 0.278226591 | 1.016216190 | 3.65 | 0.049   |
| 389 | 1267BK12#1779#asparagine 3    | 188 | 23.426 | 0.095444517 | 0.358912050 | 3.76 | 0.061   |
| 390 | 1267BK12#1794#ribose MX       | 307 | 23.570 | 0.014826097 | 0.015572721 | 1.05 | 0.861   |
| 391 | 1267BK12#1794#ribose MX       | 160 | 23.570 | 0.005376381 | 0.005424971 | 1.01 | 0.971   |
| 392 | 1267BK12#1809                 | 307 | 23.706 | 0.011888446 | 0.015572721 | 1.31 | 0.420   |
| 393 | 1267BK12#1824                 | 295 | 23.832 | 0.002210600 | 0.001447844 | 0.65 | 0.481   |
| 394 | 1267BK12#1824                 | 202 | 23.824 | 0.003599838 | 0.003564429 | 0.99 | 0.937   |
| 395 | 1267BK12#1827                 | 307 | 23.860 | 0.002582450 | 0.002502534 | 0.97 | 0.919   |
| 396 | 1267BK12#1837                 | 290 | 23.914 | 0.001155150 | 0.001618852 | 1.40 | 0.028   |
| 397 | 1267BK12#1846                 | 133 | 24.032 | 0.097652304 | 0.081048308 | 0.83 | 0.274   |
| 398 | 1267BK12#1849                 | 202 | 24.059 | 0.005744004 | 0.041958124 | 7.30 | 0.090   |
| 399 | 1267BK12#1859                 | 242 | 24.149 | 0.000884070 | 0.000370937 | 0.42 | 0.092   |
| 400 | 1267BK12#1859                 | 334 | 24.149 | 0.000982049 | 0.000902364 | 0.92 | 0.232   |
| 401 | 1267BK12#1870#rhamnose MX1    | 117 | 24.249 | 0.020759799 | 0.017717766 | 0.85 | 0.173   |
| 402 | 1267BK12#1870#rhamnose MX1    | 160 | 24.249 | 0.003422682 | 0.009011849 | 2.63 | 0.194   |
| 403 | 1267BK12#1877                 | 307 | 24.313 | 0.693848399 | 0.656401927 | 0.95 | 0.018   |
| 404 | 1267BK12#1885#ribitol         | 422 | 24.385 | 0.041068029 | 0.039572729 | 0.96 | 0.238   |
| 405 | 1267BK12#1885#ribitol         | 319 | 24.385 | 0.999669380 | 0.987926517 | 0.99 | 0.240   |
| 406 | 1267BK12#1885#ribitol TMS     | 319 | 24.395 | 1.000000000 | 1.000000000 | 1.00 | #DIV/0! |
| 407 | 1267BK12#1885#ribitol TMS     | 319 | 24.395 | 0.999669380 | 0.987926517 | 0.99 | 0.240   |
| 408 | 1267BK12#1885#ribitol TMS     | 307 | 24.395 | 0.693838015 | 0.656394301 | 0.95 | 0.018   |
| 409 | 1267BK12#1885#ribitol TMS     | 307 | 24.395 | 0.693848399 | 0.656401927 | 0.95 | 0.018   |
| 410 | 1267BK12#1885#ribitol TMS     | 422 | 24.395 | 0.041068029 | 0.039572729 | 0.96 | 0.238   |
| 411 | 1267BK12#1885#ribitol TMS     | 422 | 24.395 | 0.041068029 | 0.039572729 | 0.96 | 0.238   |
| 412 | 1267BK12#1896#putrescine 4    | 174 | 24.487 | 0.808283427 | 3.965392772 | 4.91 | 0.008   |
| 413 | 1267BK12#1903                 | 416 | 24.559 | 0.005226113 | 0.004843891 | 0.93 | 0.945   |
| 414 | 1267BK12#1908                 | 133 | 24.595 | 0.072382115 | 0.063314901 | 0.87 | 0.145   |
| 415 | 1267BK12#1916                 | 205 | 24.676 | 0.023710120 | 0.007725357 | 0.33 | 0.000   |
| 416 | 1267BK12#1918                 | 392 | 24.685 | 0.005379486 | 0.003897258 | 0.72 | 0.014   |
| 417 | 1267BK12#1918                 | 392 | 24.685 | 0.007893336 | 0.005086337 | 0.64 | 0.007   |
| 418 | 1267BK12#1925                 | 292 | 24.749 | 0.025551507 | 0.018458671 | 0.72 | 0.009   |
| 419 | 1267BK12#1925                 | 465 | 24.749 | 0.000027850 | 0.000025330 | 0.91 | 0.720   |
| 420 | 1267BK12#1940                 | 292 | 24.884 | 0.025551507 | 0.018458671 | 0.72 | 0.009   |
| 421 | 1267BK12#1940                 | 333 | 24.884 | 0.021710786 | 0.015349798 | 0.71 | 0.014   |
| 422 | 1267BK12#1946                 | 133 | 24.948 | 0.105523485 | 0.074510847 | 0.71 | 0.525   |
| 423 | 1267BK12#1953                 | 346 | 25.012 | 0.000338142 | 0.000498375 | 1.47 | 0.197   |
| 424 | 1267BK12#1953                 | 133 | 25.012 | 0.163739861 | 0.139594456 | 0.85 | 0.059   |
| 425 | 1267BK12#1961                 | 422 | 25.079 | 0.013399813 | 0.011658871 | 0.87 | 0.103   |
| 426 | 1267BK12#1961                 | 116 | 25.079 | 0.050053143 | 0.051036957 | 1.02 | 0.832   |
| 427 | 1267BK12#1967                 | 276 | 25.124 | 0.016258282 | 0.014091040 | 0.87 | 0.178   |
| 428 | 1267BK12#1967                 | 392 | 25.124 | 0.076938264 | 0.060803649 | 0.79 | 0.021   |
| 429 | 1267BK12#1967                 | 302 | 25.124 | 0.022619456 | 0.020112696 | 0.89 | 0.582   |
| 430 | 1267BK12#1970                 | 319 | 25.166 | 0.008698323 | 0.014046121 | 1.61 | 0.017   |
| 431 | 1267BK12#1970                 | 275 | 25.166 | 0.000263652 | 0.000834383 | 3.16 | 0.162   |
| 432 | 1267BK12#1970                 | 392 | 25.166 | 0.076938264 | 0.060803395 | 0.79 | 0.021   |
| 433 | 1267BK12#1997                 | 392 | 25.401 | 0.004825615 | 0.003012531 | 0.62 | 0.024   |
| 434 | 1267BK12#2001                 | 436 | 25.437 | 0.000410328 | 0.001464058 | 3.57 | 0.000   |

|     |                               |     |        |             |             |       |       |
|-----|-------------------------------|-----|--------|-------------|-------------|-------|-------|
| 435 | 1267BK12#2008                 | 292 | 25.501 | 0.019062099 | 0.000209375 | 0.01  | 0.393 |
| 436 | 1267BK12#2019                 | 312 | 25.595 | 0.001992850 | 0.002545263 | 1.28  | 0.042 |
| 437 | 1267BK12#2025                 | 392 | 25.655 | 0.025766334 | 0.020159841 | 0.78  | 0.003 |
| 438 | 1267BK12#2025                 | 249 | 25.655 | 0.000474654 | 0.000354418 | 0.75  | 0.495 |
| 439 | 1267BK12#2030                 | 392 | 25.709 | 0.025768922 | 0.020159841 | 0.78  | 0.003 |
| 440 | 1267BK12#2030                 | 317 | 25.709 | 0.001977098 | 0.002125565 | 1.08  | 0.770 |
| 441 | 1267BK12#2038                 | 292 | 25.782 | 0.004664402 | 0.005232512 | 1.12  | 0.308 |
| 442 | 1267BK12#2038                 | 333 | 25.782 | 0.005548419 | 0.005421517 | 0.98  | 0.800 |
| 443 | 1267BK12#2053                 | 244 | 25.909 | 0.005187874 | 0.004637665 | 0.89  | 0.880 |
| 444 | 1267BK12#2062#shikimic        | 204 | 25.990 | 0.100018110 | 0.129989884 | 1.30  | 0.556 |
| 445 | 1267BK12#2062#shikimic        | 462 | 25.990 | 0.000839044 | 0.000349959 | 0.42  | 0.014 |
| 446 | 1267BK12#2062#shikimic        | 372 | 25.990 | 0.001242585 | 0.001183868 | 0.95  | 0.919 |
| 447 | 1267BK12#2074#citric          | 375 | 26.100 | 0.083253082 | 0.083080432 | 1.00  | 0.983 |
| 448 | 1267BK12#2074#citric          | 273 | 26.100 | 0.466466307 | 0.463399935 | 0.99  | 0.947 |
| 449 | 1267BK12#2081#isocitric       | 319 | 26.172 | 0.014050117 | 0.006534589 | 0.47  | 0.090 |
| 450 | 1267BK12#2087                 | 304 | 26.208 | 0.006309043 | 0.004094397 | 0.65  | 0.074 |
| 451 | 1267BK12#2114                 | 316 | 26.461 | 0.001202855 | 0.024762793 | 20.59 | 0.000 |
| 452 | 1267BK12#2114                 | 206 | 26.461 | 0.004247605 | 0.002764683 | 0.65  | 0.206 |
| 453 | 1267BK12#2124#dehydroascorbic | 316 | 26.552 | 0.028984012 | 0.024762793 | 0.85  | 0.214 |
| 454 | 1267BK12#2124#dehydroascorbic | 173 | 26.552 | 0.078066624 | 0.066737144 | 0.85  | 0.196 |
| 455 | 1267BK12#2124#dehydroascorbic | 157 | 26.552 | 0.063561794 | 0.054093446 | 0.85  | 0.103 |
| 456 | 1267BK12#2145#quinic          | 255 | 26.743 | 0.000793589 | 0.000501535 | 0.63  | 0.236 |
| 457 | 1267BK12#2145#quinic          | 345 | 26.743 | 0.000927997 | 0.000281886 | 0.30  | 0.025 |
| 458 | 1267BK12#2151                 | 260 | 26.798 | 0.003202875 | 0.003097728 | 0.97  | 0.931 |
| 459 | 1267BK12#2162                 | 149 | 26.924 | 0.115378031 | 0.112164178 | 0.97  | 0.830 |
| 460 | 1267BK12#2171#fru MX1         | 307 | 26.980 | 6.778265539 | 7.638221419 | 1.13  | 0.267 |
| 461 | 1267BK12#2171#fru MX1         | 569 | 26.980 | 0.044524730 | 0.068293244 | 1.53  | 0.316 |
| 462 | 1267BK12#2177                 | 389 | 27.026 | 0.002309108 | 0.003857261 | 1.67  | 0.329 |
| 463 | 1267BK12#2177                 | 157 | 27.026 | 0.230564409 | 0.330860518 | 1.44  | 0.473 |
| 464 | 1267BK12#2181                 | 307 | 27.082 | 6.428139846 | 7.279214144 | 1.13  | 0.412 |
| 465 | 1267BK12#2181                 | 245 | 27.082 | 0.030874686 | 0.046637840 | 1.51  | 0.411 |
| 466 | 1267BK12#2190#fru MX2         | 307 | 27.154 | 5.401392799 | 7.273958033 | 1.35  | 0.105 |
| 467 | 1267BK12#2190#fru MX2         | 569 | 27.154 | 0.053513328 | 0.068242804 | 1.28  | 0.280 |
| 468 | 1267BK12#2196#man MX          | 160 | 27.208 | 0.046172645 | 0.107981381 | 2.34  | 0.119 |
| 469 | 1267BK12#2196#man MX          | 319 | 27.208 | 0.032340905 | 0.316083438 | 9.77  | 0.000 |
| 470 | 1267BK12#2216#glc MX1         | 160 | 27.390 | 4.505734735 | 0.796283612 | 0.18  | 0.005 |
| 471 | 1267BK12#2216#glc MX1         | 466 | 27.390 | 0.063413623 | 0.063599130 | 1.00  | 0.992 |
| 472 | 1267BK12#2220#nonadecane      | 85  | 27.429 | 2.923257721 | 2.525537852 | 0.86  | 0.181 |
| 473 | 1267BK12#2237#tyramine        | 174 | 27.591 | 0.017575082 | 0.079081688 | 4.50  | 0.209 |
| 474 | 1267BK12#2237#tyramine        | 338 | 27.591 | 0.001087221 | 0.000613612 | 0.56  | 0.008 |
| 475 | 1267BK12#2248#glc MX2         | 160 | 27.691 | 1.389066194 | 2.263349836 | 1.63  | 0.005 |
| 476 | 1267BK12#2248#glc MX2         | 319 | 27.691 | 2.239974634 | 3.138211693 | 1.40  | 0.015 |
| 477 | 1267BK12#2259                 | 242 | 27.791 | 0.002888010 | 0.002548260 | 0.88  | 0.518 |
| 478 | 1267BK12#2259                 | 389 | 27.791 | 0.001098228 | 0.000681950 | 0.62  | 0.083 |
| 479 | 1267BK12#2265                 | 244 | 27.846 | 0.004955767 | 0.004039884 | 0.82  | 0.342 |
| 480 | 1267BK12#2270                 | 362 | 27.891 | 0.002754202 | 0.000899197 | 0.33  | 0.081 |
| 481 | 1267BK12#2285                 | 229 | 28.027 | 0.001755980 | 0.004588220 | 2.61  | 0.005 |
| 482 | 1267BK12#2285                 | 330 | 28.027 | 0.000782007 | 0.000785320 | 1.00  | 0.980 |
| 483 | 1267BK12#2290#tyrosine        | 354 | 28.073 | 0.002511463 | 0.003450350 | 1.37  | 0.086 |
| 484 | 1267BK12#2298                 | 404 | 28.137 | 0.005148478 | 0.006142876 | 1.19  | 0.475 |
| 485 | 1267BK12#2298                 | 244 | 28.137 | 0.026636819 | 0.029286965 | 1.10  | 0.316 |
| 486 | 1267BK12#2309#L-ascorbic      | 332 | 28.246 | 0.002182051 | 0.001895952 | 0.87  | 0.012 |
| 487 | 1267BK12#2309#L-ascorbic      | 449 | 28.246 | 0.004873765 | 0.015315364 | 3.14  | 0.235 |
| 488 | 1267BK12#2309#L-ascorbic      | 464 | 28.246 | 0.000604113 | 0.001923711 | 3.18  | 0.014 |
| 489 | 1267BK12#2320#D-isoascorbic   | 332 | 28.348 | 0.000995864 | 0.001566521 | 1.57  | 0.104 |
| 490 | 1267BK12#2320#D-isoascorbic   | 332 | 28.348 | 0.000995864 | 0.003303506 | 3.32  | 0.238 |
| 491 | 1267BK12#2320#D-isoascorbic   | 449 | 28.348 | 0.002061918 | 0.020300755 | 9.85  | 0.012 |
| 492 | 1267BK12#2320#D-isoascorbic   | 449 | 28.348 | 0.002061918 | 0.020300755 | 9.85  | 0.012 |
| 493 | 1267BK12#2320#D-isoascorbic   | 464 | 28.348 | 0.001414874 | 0.000624171 | 0.44  | 0.277 |
| 494 | 1267BK12#2320#D-isoascorbic   | 464 | 28.348 | 0.001414874 | 0.000624171 | 0.44  | 0.277 |
| 495 | 1267BK12#2320#D-isoascorbic   | 332 | 28.348 | 0.000995864 | 0.001566521 | 1.57  | 0.104 |
| 496 | 1267BK12#2320#D-isoascorbic   | 464 | 28.348 | 0.001414874 | 0.000624171 | 0.44  | 0.277 |
| 497 | 1267BK12#2325                 | 299 | 28.396 | 0.016355291 | 0.012825961 | 0.78  | 0.029 |

|     |                              |     |        |             |             |       |       |
|-----|------------------------------|-----|--------|-------------|-------------|-------|-------|
| 498 | 1267BK12#2336                | 420 | 28.496 | 0.001346906 | 0.000350183 | 0.26  | 0.011 |
| 499 | 1267BK12#2336                | 330 | 28.496 | 0.000466332 | 0.000219634 | 0.47  | 0.106 |
| 500 | 1267BK12#2341                | 420 | 28.550 | 0.000843112 | 0.000254097 | 0.30  | 0.221 |
| 501 | 1267BK12#2354                | 394 | 28.668 | 0.000086486 | 0.000082806 | 0.96  | 0.892 |
| 502 | 1267BK12#2364#c-caffeic      | 219 | 28.750 | 0.001362188 | 0.000890708 | 0.65  | 0.383 |
| 503 | 1267BK12#2364#c-caffeic      | 396 | 28.750 | 0.000079787 | 0.000088436 | 1.11  | 0.720 |
| 504 | 1267BK12#2364#c-caffeic      | 381 | 28.750 | 0.000081763 | 0.000060993 | 0.75  | 0.574 |
| 505 | 1267BK12#2370                | 204 | 28.806 | 0.043941994 | 0.099712166 | 2.27  | 0.182 |
| 506 | 1267BK12#2384                | 332 | 28.942 | 0.001669923 | 0.002083628 | 1.25  | 0.276 |
| 507 | 1267BK12#2384                | 190 | 28.942 | 0.002019950 | 0.001638143 | 0.81  | 0.694 |
| 508 | 1267BK12#2396                | 447 | 29.051 | 0.019450640 | 0.022920443 | 1.18  | 0.246 |
| 509 | 1267BK12#2401                | 190 | 29.079 | 0.000960332 | 0.002278321 | 2.37  | 0.336 |
| 510 | 1267BK12#2401                | 230 | 29.079 | 0.001237587 | 0.000406809 | 0.33  | 0.342 |
| 511 | 1267BK12#2412                | 206 | 29.188 | 0.007004333 | 0.005514168 | 0.79  | 0.092 |
| 512 | 1267BK12#2412                | 116 | 29.188 | 0.005542126 | 0.004362460 | 0.79  | 0.082 |
| 513 | 1267BK12#2436                | 174 | 29.406 | 0.031155926 | 0.039774329 | 1.28  | 0.177 |
| 514 | 1267BK12#2455                | 319 | 29.578 | 0.147138772 | 0.288551785 | 1.96  | 0.001 |
| 515 | 1267BK12#2463                | 373 | 29.652 | 0.000999834 | 0.000837343 | 0.84  | 0.611 |
| 516 | 1267BK12#2476#16:0           | 313 | 29.770 | 0.051969139 | 0.046559115 | 0.90  | 0.446 |
| 517 | 1267BK12#2483                | 360 | 29.833 | 0.000742187 | 0.000591395 | 0.80  | 0.059 |
| 518 | 1267BK12#2512                | 484 | 30.097 | 0.000105940 | 0.000087117 | 0.82  | 0.571 |
| 519 | 1267BK12#2527#dopamine       | 174 | 30.234 | 0.001124286 | 0.001768589 | 1.57  | 0.478 |
| 520 | 1267BK12#2527#dopamine       | 426 | 30.234 | 0.000035078 | 0.000030615 | 0.87  | 0.691 |
| 521 | 1267BK12#2537                | 288 | 30.326 | 0.000455688 | 0.000670753 | 1.47  | 0.351 |
| 522 | 1267BK12#2548#myo-ino        | 507 | 30.426 | 0.022944286 | 0.029509436 | 1.29  | 0.064 |
| 523 | 1267BK12#2548#myo-ino        | 305 | 30.426 | 0.725367003 | 0.932267889 | 1.29  | 0.042 |
| 524 | 1267BK12#2559                | 262 | 30.527 | 0.000523698 | 0.001298698 | 2.48  | 0.009 |
| 525 | 1267BK12#2559                | 205 | 30.527 | 0.031094907 | 0.136633382 | 4.39  | 0.020 |
| 526 | 1267BK12#2560#t-ferulic      | 338 | 30.536 | 0.001056899 | 0.000899810 | 0.85  | 0.298 |
| 527 | 1267BK12#2560#t-ferulic      | 249 | 30.536 | 0.000654573 | 0.000584143 | 0.89  | 0.523 |
| 528 | 1267BK12#2560#t-ferulic      | 323 | 30.536 | 0.000680925 | 0.000674438 | 0.99  | 0.962 |
| 529 | 1267BK12#2584                | 373 | 30.756 | 0.003813704 | 0.009813715 | 2.57  | 0.077 |
| 530 | 1267BK12#2589                | 319 | 30.784 | 0.041991679 | 0.022982471 | 0.55  | 0.026 |
| 531 | 1267BK12#2609                | 319 | 30.975 | 0.014898755 | 0.015236490 | 1.02  | 0.879 |
| 532 | 1267BK12#2620                | 352 | 31.102 | 0.000197833 | 0.000385813 | 1.95  | 0.279 |
| 533 | 1267BK12#2633#t-caffeic      | 396 | 31.194 | 0.000380717 | 0.000339118 | 0.89  | 0.574 |
| 534 | 1267BK12#2633#t-caffeic      | 219 | 31.194 | 0.001321650 | 0.001355623 | 1.03  | 0.898 |
| 535 | 1267BK12#2633#t-caffeic      | 381 | 31.194 | 0.000156299 | 0.000094892 | 0.61  | 0.046 |
| 536 | 1267BK12#2639                | 319 | 31.258 | 0.015038233 | 0.014826680 | 0.99  | 0.974 |
| 537 | 1267BK12#2660#noradrenalin 5 | 174 | 31.449 | 0.001702538 | 0.004093468 | 2.40  | 0.000 |
| 538 | 1267BK12#2685                | 364 | 31.686 | 0.000578679 | 0.000575919 | 1.00  | 0.964 |
| 539 | 1267BK12#2685                | 230 | 31.686 | 0.000673179 | 0.000749898 | 1.11  | 0.541 |
| 540 | 1267BK12#2715                | 249 | 31.950 | 0.010493294 | 0.013065322 | 1.25  | 0.107 |
| 541 | 1267BK12#2715                | 204 | 31.950 | 0.070329423 | 0.132684294 | 1.89  | 0.078 |
| 542 | 1267BK12#2723                | 218 | 32.024 | 0.005140510 | 0.006577298 | 1.28  | 0.028 |
| 543 | 1267BK12#2723                | 235 | 32.024 | 0.002659055 | 0.004465538 | 1.68  | 0.002 |
| 544 | 1267BK12#2734#docosane       | 85  | 32.126 | 2.690849044 | 2.461724104 | 0.91  | 0.102 |
| 545 | 1267BK12#2738                | 357 | 32.166 | 0.000055882 | 0.001323530 | 23.68 | 0.072 |
| 546 | 1267BK12#2738                | 445 | 32.166 | 0.000057777 | 0.000471525 | 8.16  | 0.101 |
| 547 | 1267BK12#2742#tryptophan 2   | 202 | 32.204 | 0.010137902 | 0.012067047 | 1.19  | 0.787 |
| 548 | 1267BK12#2742#tryptophan 2   | 391 | 32.204 | 0.000218717 | 0.000574219 | 2.63  | 0.003 |
| 549 | 1267BK12#2742#tryptophan 2   | 278 | 32.204 | 0.000355796 | 0.000816400 | 2.29  | 0.002 |
| 550 | 1267BK12#2758#tryptophan 3   | 202 | 32.350 | 0.018733394 | 0.132339001 | 7.06  | 0.001 |
| 551 | 1267BK12#2758#tryptophan 3   | 291 | 32.350 | 0.002086166 | 0.013559322 | 6.50  | 0.001 |
| 552 | 1267BK12#2758#tryptophan 3   | 200 | 32.350 | 0.000655851 | 0.004016500 | 6.12  | 0.001 |
| 553 | 1267BK12#2801#18:0           | 341 | 32.742 | 0.049522626 | 0.045648259 | 0.92  | 0.409 |
| 554 | 1267BK12#2809#t-sinapic      | 368 | 32.815 | 0.063420764 | 0.050137390 | 0.79  | 0.187 |
| 555 | 1267BK12#2809#t-sinapic      | 338 | 32.815 | 0.065316119 | 0.049943476 | 0.76  | 0.130 |
| 556 | 1267BK12#2809#t-sinapic      | 353 | 32.815 | 0.033829678 | 0.026029828 | 0.77  | 0.142 |
| 557 | 1267BK12#2822                | 159 | 32.933 | 0.012936921 | 0.010769368 | 0.83  | 0.093 |
| 558 | 1267BK12#2822                | 286 | 32.933 | 0.001817085 | 0.001820156 | 1.00  | 0.995 |
| 559 | 1267BK12#2859                | 290 | 33.272 | 0.014942409 | 0.016545360 | 1.11  | 0.524 |
| 560 | 1267BK12#2859                | 319 | 33.272 | 0.006493754 | 0.008040588 | 1.24  | 0.227 |

|     |                             |     |        |             |             |      |       |
|-----|-----------------------------|-----|--------|-------------|-------------|------|-------|
| 561 | 1267BK12#2881               | 263 | 33.472 | 0.000540111 | 0.000396876 | 0.73 | 0.288 |
| 562 | 1267BK12#2881               | 259 | 33.472 | 0.000121815 | 0.000122683 | 1.01 | 0.983 |
| 563 | 1267BK12#2907               | 328 | 33.719 | 0.005558722 | 0.006803737 | 1.22 | 0.713 |
| 564 | 1267BK12#2908#fru-6-P MX    | 315 | 33.718 | 0.002286477 | 0.004298989 | 1.88 | 0.199 |
| 565 | 1267BK12#2908#fru-6-P MX    | 260 | 33.718 | 0.000257574 | 0.000413905 | 1.61 | 0.321 |
| 566 | 1267BK12#2921               | 173 | 33.820 | 0.001082483 | 0.000719521 | 0.66 | 0.106 |
| 567 | 1267BK12#2926#glc-6-P MX1   | 387 | 33.892 | 0.006143945 | 0.012546310 | 2.04 | 0.222 |
| 568 | 1267BK12#2944               | 277 | 34.057 | 0.000095341 | 0.000108457 | 1.14 | 0.753 |
| 569 | 1267BK12#2944               | 204 | 34.057 | 0.003347786 | 0.003792424 | 1.13 | 0.444 |
| 570 | 1267BK12#2953#glc-6-P MX2   | 387 | 34.131 | 0.001204030 | 0.002373340 | 1.97 | 0.274 |
| 571 | 1267BK12#2958               | 417 | 34.177 | 0.000809304 | 0.000678259 | 0.84 | 0.573 |
| 572 | 1267BK12#2958               | 489 | 34.177 | 0.000306315 | 0.000268822 | 0.88 | 0.744 |
| 573 | 1267BK12#2975               | 331 | 34.332 | 0.003616481 | 0.002836912 | 0.78 | 0.520 |
| 574 | 1267BK12#2975               | 204 | 34.332 | 0.002454692 | 0.001659179 | 0.68 | 0.018 |
| 575 | 1267BK12#2975               | 172 | 34.332 | 0.000899345 | 0.000916453 | 1.02 | 0.954 |
| 576 | 1267BK12#2980               | 331 | 34.379 | 0.004477151 | 0.004113934 | 0.92 | 0.568 |
| 577 | 1267BK12#2980               | 262 | 34.379 | 0.002299969 | 0.002111644 | 0.92 | 0.488 |
| 578 | 1267BK12#2980               | 421 | 34.379 | 0.001946559 | 0.001553474 | 0.80 | 0.286 |
| 579 | 1267BK12#3007               | 351 | 34.626 | 0.000400324 | 0.000339121 | 0.85 | 0.093 |
| 580 | 1267BK12#3007               | 204 | 34.626 | 0.062289847 | 0.015673312 | 0.25 | 0.003 |
| 581 | 1267BK12#3014               | 292 | 34.690 | 0.020723810 | 0.005680402 | 0.27 | 0.006 |
| 582 | 1267BK12#3014               | 204 | 34.690 | 0.063705687 | 0.018996875 | 0.30 | 0.003 |
| 583 | 1267BK12#3034               | 91  | 34.872 | 0.003105449 | 0.003168303 | 1.02 | 0.872 |
| 584 | 1267BK12#3034               | 204 | 34.872 | 0.006051694 | 0.005135472 | 0.85 | 0.207 |
| 585 | 1267BK12#3058               | 356 | 35.138 | 0.001492802 | 0.001869282 | 1.25 | 0.670 |
| 586 | 1267BK12#3058               | 262 | 35.138 | 0.000977562 | 0.001239144 | 1.27 | 0.642 |
| 587 | 1267BK12#3061#myo-ino-2-P 1 | 318 | 35.131 | 0.002656006 | 0.003477650 | 1.31 | 0.193 |
| 588 | 1267BK12#3081               | 159 | 35.302 | 0.000190549 | 0.000677707 | 3.56 | 0.001 |
| 589 | 1267BK12#3097               | 245 | 35.458 | 0.000752728 | 0.000595858 | 0.79 | 0.323 |
| 590 | 1267BK12#3097               | 360 | 35.458 | 0.000526379 | 0.000496320 | 0.94 | 0.743 |
| 591 | 1267BK12#3118               | 430 | 35.642 | 0.000825394 | 0.001033762 | 1.25 | 0.505 |
| 592 | 1267BK12#3118               | 360 | 35.642 | 0.000793086 | 0.000929233 | 1.17 | 0.630 |
| 593 | 1267BK12#3179               | 204 | 36.200 | 0.010421940 | 0.013397770 | 1.29 | 0.080 |
| 594 | 1267BK12#3179               | 247 | 36.200 | 0.000145156 | 0.000106296 | 0.73 | 0.147 |
| 595 | 1267BK12#3189               | 105 | 36.292 | 0.000722057 | 0.000725648 | 1.00 | 0.988 |
| 596 | 1267BK12#3189               | 356 | 36.292 | 0.000860245 | 0.001375750 | 1.60 | 0.429 |
| 597 | 1267BK12#3189               | 223 | 36.292 | 0.000368303 | 0.000194303 | 0.53 | 0.004 |
| 598 | 1267BK12#3203               | 321 | 36.419 | 0.026037146 | 0.021886079 | 0.84 | 0.288 |
| 599 | 1267BK12#3203               | 204 | 36.419 | 0.155087661 | 0.129315044 | 0.83 | 0.219 |
| 600 | 1267BK12#3203               | 361 | 36.419 | 0.010113815 | 0.008964837 | 0.89 | 0.422 |
| 601 | 1267BK12#3258               | 219 | 36.923 | 0.012647965 | 0.005248926 | 0.42 | 0.004 |
| 602 | 1267BK12#3278               | 290 | 37.107 | 0.000089254 | 0.000152023 | 1.70 | 0.183 |
| 603 | 1267BK12#3283               | 304 | 37.144 | 0.000058170 | 0.000066414 | 1.14 | 0.583 |
| 604 | 1267BK12#3283               | 175 | 37.144 | 0.000158291 | 0.000306702 | 1.94 | 0.274 |
| 605 | 1267BK12#3302               | 361 | 37.336 | 0.011726851 | 0.017433675 | 1.49 | 0.035 |
| 606 | 1267BK12#3302               | 267 | 37.336 | 0.000096234 | 0.000154030 | 1.60 | 0.433 |
| 607 | 1267BK12#3317               | 254 | 37.465 | 0.000257324 | 0.000255297 | 0.99 | 0.984 |
| 608 | 1267BK12#3323               | 535 | 37.520 | 0.000170102 | 0.000148503 | 0.87 | 0.700 |
| 609 | 1267BK12#3382#sucrose       | 437 | 38.090 | 0.456357170 | 0.378730647 | 0.83 | 0.337 |
| 610 | 1267BK12#3386#sucrose       | 451 | 38.099 | 0.183299547 | 0.153244198 | 0.84 | 0.330 |
| 611 | 1267BK12#3391               | 423 | 38.169 | 0.005083022 | 0.002818263 | 0.55 | 0.028 |
| 612 | 1267BK12#3431               | 204 | 38.510 | 0.014661941 | 0.020382769 | 1.39 | 0.023 |
| 613 | 1267BK12#3467               | 450 | 38.859 | 0.000133800 | 0.000108566 | 0.81 | 0.664 |
| 614 | 1267BK12#3487               | 204 | 39.034 | 0.016849350 | 0.016798944 | 1.00 | 0.978 |
| 615 | 1267BK12#3515#maltose MX1   | 204 | 39.300 | 0.022843298 | 0.010594293 | 0.46 | 0.004 |
| 616 | 1267BK12#3515#maltose MX1   | 160 | 39.300 | 0.002257838 | 0.001531491 | 0.68 | 0.043 |
| 617 | 1267BK12#3522#trehalose     | 191 | 39.356 | 0.008903514 | 0.006951899 | 0.78 | 0.158 |
| 618 | 1267BK12#3559               | 193 | 39.695 | 0.001533087 | 0.001385782 | 0.90 | 0.450 |
| 619 | 1267BK12#3586               | 105 | 39.944 | 0.095306894 | 0.086189695 | 0.90 | 0.067 |
| 620 | 1267BK12#3586               | 179 | 39.944 | 0.136676866 | 0.123594652 | 0.90 | 0.340 |
| 621 | 1267BK12#3594#octacosane    | 85  | 40.018 | 2.344359835 | 2.103481987 | 0.90 | 0.111 |
| 622 | 1267BK12#3622               | 277 | 40.279 | 0.000043003 | 0.000124849 | 2.90 | 0.069 |
| 623 | 1267BK12#3633               | 450 | 40.380 | 0.000153846 | 0.000149832 | 0.97 | 0.924 |

|     |                                |     |        |             |             |      |       |
|-----|--------------------------------|-----|--------|-------------|-------------|------|-------|
| 624 | 1267BK12#3668                  | 345 | 40.730 | 0.000085596 | 0.000068356 | 0.80 | 0.461 |
| 625 | 1267BK12#3668                  | 175 | 40.730 | 0.000166329 | 0.000131318 | 0.79 | 0.269 |
| 626 | 1267BK12#3674                  | 312 | 40.766 | 0.000095423 | 0.000084132 | 0.88 | 0.830 |
| 627 | 1267BK12#3674                  | 219 | 40.766 | 0.000686752 | 0.000444387 | 0.65 | 0.110 |
| 628 | 1267BK12#3721                  | 280 | 41.199 | 0.000111410 | 0.000085188 | 0.76 | 0.401 |
| 629 | 1267BK12#3768                  | 191 | 41.631 | 0.001652963 | 0.000533565 | 0.32 | 0.004 |
| 630 | 1267BK12#3768                  | 204 | 41.631 | 0.001939222 | 0.001312338 | 0.68 | 0.142 |
| 631 | 1267BK12#3775                  | 289 | 41.688 | 0.000120655 | 0.000051001 | 0.42 | 0.116 |
| 632 | 1267BK12#3802                  | 345 | 41.945 | 0.000079236 | 0.000250125 | 3.16 | 0.049 |
| 633 | 1267BK12#3802                  | 249 | 41.945 | 0.000101494 | 0.000108281 | 1.07 | 0.845 |
| 634 | 1267BK12#3821                  | 249 | 42.130 | 0.000106184 | 0.000082334 | 0.78 | 0.533 |
| 635 | 1267BK12#3827                  | 204 | 42.167 | 0.017074541 | 0.056024852 | 3.28 | 0.000 |
| 636 | 1267BK12#3827                  | 191 | 42.167 | 0.004040822 | 0.014070941 | 3.48 | 0.000 |
| 637 | 1267BK12#3827                  | 433 | 42.167 | 0.000794258 | 0.002479515 | 3.12 | 0.000 |
| 638 | 1267BK12#3841#3-c-caffeoquinic | 345 | 42.296 | 0.000190521 | 0.000469341 | 2.46 | 0.002 |
| 639 | 1267BK12#3841#3-c-caffeoquinic | 255 | 42.296 | 0.000134803 | 0.000177409 | 1.32 | 0.547 |
| 640 | 1267BK12#3856                  | 204 | 42.434 | 0.249915397 | 0.167629045 | 0.67 | 0.031 |
| 641 | 1267BK12#3856                  | 433 | 42.434 | 0.006470972 | 0.004416367 | 0.68 | 0.054 |
| 642 | 1267BK12#3856                  | 191 | 42.434 | 0.045542173 | 0.030556949 | 0.67 | 0.038 |
| 643 | 1267BK12#3858#5-c-caffeoquinic | 345 | 42.462 | 0.001230949 | 0.000822708 | 0.67 | 0.015 |
| 644 | 1267BK12#3858#5-c-caffeoquinic | 447 | 42.453 | 0.000021198 | 0.000013419 | 0.63 | 0.127 |
| 645 | 1267BK12#3865#4-c-caffeoquinic | 307 | 42.517 | 0.001279968 | 0.000915470 | 0.72 | 0.029 |
| 646 | 1267BK12#3865#4-c-caffeoquinic | 489 | 42.517 | 0.000029018 | 0.000037988 | 1.31 | 0.423 |
| 647 | 1267BK12#3930                  | 396 | 43.127 | 0.000023879 | 0.000080800 | 3.38 | 0.047 |
| 648 | 1267BK12#3930                  | 219 | 43.127 | 0.001523097 | 0.003082475 | 2.02 | 0.039 |
| 649 | 1267BK12#3954                  | 396 | 43.339 | 0.000029558 | 0.000028914 | 0.98 | 0.947 |
| 650 | 1267BK12#3954                  | 219 | 43.339 | 0.001159160 | 0.001239031 | 1.07 | 0.909 |
| 651 | 1267BK12#3963                  | 345 | 43.431 | 0.000111807 | 0.000087244 | 0.78 | 0.475 |
| 652 | 1267BK12#3963                  | 396 | 43.431 | 0.000032074 | 0.000034503 | 1.08 | 0.775 |
| 653 | 1267BK12#3987#3-t-caffeoquinic | 345 | 43.644 | 0.000152172 | 0.000057448 | 0.38 | 0.435 |
| 654 | 1267BK12#3987#3-t-caffeoquinic | 255 | 43.644 | 0.000312890 | 0.000081232 | 0.26 | 0.381 |
| 655 | 1267BK12#3996                  | 204 | 43.730 | 0.108477760 | 0.139579631 | 1.29 | 0.185 |
| 656 | 1267BK12#3996                  | 363 | 43.730 | 0.005862383 | 0.001776422 | 0.30 | 0.042 |
| 657 | 1267BK12#4004                  | 597 | 43.806 | 0.004762488 | 0.007003152 | 1.47 | 0.087 |
| 658 | 1267BK12#4045                  | 249 | 44.176 | 0.000288153 | 0.000074246 | 0.26 | 0.005 |
| 659 | 1267BK12#4045                  | 255 | 44.176 | 0.000239178 | 0.000097354 | 0.41 | 0.041 |
| 660 | 1267BK12#4062#4-t-caffeoquinic | 307 | 44.343 | 0.000069098 | 0.000086175 | 1.25 | 0.634 |
| 661 | 1267BK12#4062#4-t-caffeoquinic | 489 | 44.343 | 0.000032042 | 0.000042471 | 1.33 | 0.346 |
| 662 | 1267BK12#4075#dotriacontane    | 85  | 44.468 | 2.226958506 | 1.973082330 | 0.89 | 0.074 |
| 663 | 1267BK12#4085#5-t-caffeoquinic | 307 | 44.565 | 0.000099757 | 0.000076550 | 0.77 | 0.398 |
| 664 | 1267BK12#4085#5-t-caffeoquinic | 447 | 44.565 | 0.000027256 | 0.000018080 | 0.66 | 0.205 |
| 665 | 1267BK12#4096                  | 204 | 44.658 | 0.001544768 | 0.000384858 | 0.25 | 0.015 |
| 666 | 1267BK12#4096                  | 345 | 44.658 | 0.000056829 | 0.000057351 | 1.01 | 0.969 |
| 667 | 1267BK12#4175                  | 279 | 45.399 | 0.000554233 | 0.000309512 | 0.56 | 0.124 |
| 668 | 1267BK12#4175                  | 255 | 45.399 | 0.000112603 | 0.000101026 | 0.90 | 0.774 |
| 669 | 1267BK12#4278                  | 361 | 46.352 | 0.036009951 | 0.102845530 | 2.86 | 0.004 |
| 670 | 1267BK12#4278                  | 450 | 46.352 | 0.000193110 | 0.000554238 | 2.87 | 0.123 |
| 671 | 1267BK12#4278                  | 319 | 46.352 | 0.002127519 | 0.004620917 | 2.17 | 0.119 |
| 672 | 1267BK12#4302                  | 441 | 46.585 | 0.020822253 | 0.042053982 | 2.02 | 0.036 |
| 673 | 1267BK12#4500#hexatriacontane  | 85  | 48.418 | 1.938030962 | 1.731516775 | 0.89 | 0.154 |
| 674 | 1267BK14#3416                  | 204 | 38.418 | 0.021139283 | 0.023021116 | 1.09 | 0.546 |
| 675 | 1267BK14#3416                  | 217 | 38.418 | 0.006968434 | 0.007882665 | 1.13 | 0.207 |
| 676 | 1267BK14#3416                  | 451 | 38.418 | 0.000161349 | 0.000149062 | 0.92 | 0.680 |
| 677 | 1267BK14#3416                  | 361 | 38.418 | 0.003428110 | 0.003144032 | 0.92 | 0.614 |
| 678 | 1267BK38#3430                  | 204 | 38.538 | 0.014661941 | 0.020382769 | 1.39 | 0.023 |
| 679 | 1267BK38#3430                  | 361 | 38.538 | 0.001695065 | 0.001471884 | 0.87 | 0.534 |
| 680 | 1267BK38#3430                  | 423 | 38.538 | 0.000759361 | 0.000691792 | 0.91 | 0.509 |
| 681 | 1267BK38#3466                  | 361 | 38.873 | 0.020629111 | 0.006327314 | 0.31 | 0.047 |
| 682 | 1267BK38#3466                  | 423 | 38.873 | 0.000028980 | 0.000051514 | 1.78 | 0.144 |
| 683 | 1267BK38#3466                  | 217 | 38.873 | 0.039941698 | 0.016789436 | 0.42 | 0.039 |
| 684 | 1267BK38#4348                  | 259 | 47.146 | 0.000037618 | 0.000067469 | 1.79 | 0.073 |
| 685 | 1267BK38#4348                  | 217 | 47.146 | 0.000205610 | 0.000151017 | 0.73 | 0.255 |
| 686 | 1267BK38#4348                  | 349 | 47.146 | 0.000024929 | 0.000028747 | 1.15 | 0.745 |



|     |                                |         |        |             |             |      |       |
|-----|--------------------------------|---------|--------|-------------|-------------|------|-------|
| 687 | 1267BK38#4360                  | 361     | 47.254 | 0.000075201 | 0.000083100 | 1.11 | 0.799 |
| 688 | 1267BK38#4360                  | 204     | 47.254 | 0.000193829 | 0.000146071 | 0.75 | 0.496 |
| 689 | 1267BK38#4360                  | 271     | 47.254 | 0.000103009 | 0.000087683 | 0.85 | 0.607 |
| 690 | 1283BV06#2056#glyceric-3-P     | 357     | 25.932 | 0.001083733 | 0.002189887 | 2.02 | 0.201 |
| 691 | 1286BU03#0764#norvaline 2      | 144     | 14.409 | 0.000927413 | 0.000362377 | 0.39 | 0.067 |
| 692 | 1286BU03#0764#norvaline 2      | 218     | 14.409 | 0.000194866 | 0.000172364 | 0.88 | 0.902 |
| 693 | 1286BU04#2069#isocitric        | 245     | 26.178 | 0.003628407 | 0.005338471 | 1.47 | 0.255 |
| 694 | 1286BU04#2069#isocitric        | 375     | 26.178 | 0.083270338 | 0.083096491 | 1.00 | 0.983 |
| 695 | 1286BU07#2401#saccharic        | 292     | 29.206 | 0.003776448 | 0.005226299 | 1.38 | 0.009 |
| 696 | 1286BU08#2094                  | 160     | 26.428 | 0.015412034 | 0.018494347 | 1.20 | 0.169 |
| 697 | 1286BU08#2094                  | 334     | 26.428 | 0.000290453 | 0.000500995 | 1.72 | 0.151 |
| 698 | 1286BU08#2094                  | 189     | 26.428 | 0.001995775 | 0.001410709 | 0.71 | 0.641 |
| 699 | 1286BU08#2283#galacturonic MX1 | 160     | 28.162 | 0.002655846 | 0.005771424 | 2.17 | 0.004 |
| 700 | 1286BU08#2314#galacturonic MX2 | 160     | 28.449 | 0.002635603 | 0.003920697 | 1.49 | 0.391 |
| 701 | 1286BU10#2380#gluconic         | 333     | 29.046 | 0.024992332 | 0.026141635 | 1.05 | 0.930 |
| 702 | 1286BU10#2380#gluconic         | 292     | 29.046 | 0.026884992 | 0.034764807 | 1.29 | 0.335 |
| 703 | 1286BU10#2380#gluconic         | 423     | 29.046 | 0.003157393 | 0.003278107 | 1.04 | 0.956 |
| 704 | 1286BU10#2380#gluconic         | 433     | 29.046 | 0.002779286 | 0.003419337 | 1.23 | 0.488 |
| 705 | 1286BU13#1452#g-aminobutyric 3 | 174     | 20.640 | 0.394263531 | 0.710729747 | 1.80 | 0.006 |
| 706 | 1286BU13#1452#g-aminobutyric 3 | 304     | 20.640 | 0.076048022 | 0.139482066 | 1.83 | 0.006 |
| 707 | 1310BK02#3728#d-tocopherol     | 474+475 | 41.175 | 0.000052792 | 0.000035599 | 0.67 | 0.267 |
| 708 | 1310BK02#3728#d-tocopherol     | 208     | 41.175 | 0.000186990 | 0.000190208 | 1.02 | 0.905 |
| 709 | 1310BK02#3834#b-tocopherol     | 488+489 | 42.144 | 0.000050027 | 0.000038268 | 0.76 | 0.528 |
| 710 | 1310BK02#3834#b-tocopherol     | 223     | 42.144 | 0.000078212 | 0.000091381 | 1.17 | 0.497 |
| 711 | 1310BK02#3848#g-tocopherol     | 488+489 | 42.273 | 0.000047232 | 0.000038268 | 0.81 | 0.555 |
| 712 | 1310BK02#3848#g-tocopherol     | 223     | 42.273 | 0.000119946 | 0.000071130 | 0.59 | 0.309 |
| 713 | 1310BK02#4014#a-tocopherol     | 502+503 | 43.815 | 0.000043641 | 0.000036403 | 0.83 | 0.564 |
| 714 | 1310BK02#4014#a-tocopherol     | 237     | 43.815 | 0.000053437 | 0.000067513 | 1.26 | 0.533 |
| 715 | 1310BK02#4065#a-tocopherolacet | 430     | 44.291 | 0.000078270 | 0.000062154 | 0.79 | 0.460 |
| 716 | 1310BK02#4065#a-tocopherolacet | 165     | 44.291 | 0.000189727 | 0.000088102 | 0.46 | 0.029 |
| 717 | 1323AU19#2803#myo-ino-1-P 1    | 299     | 35.149 | 0.001511498 | 0.001904838 | 1.26 | 0.312 |
| 718 | 1323AU19#2803#myo-ino-1-P 1    | 318     | 35.149 | 0.002672979 | 0.003477650 | 1.30 | 0.201 |
| 719 | 1323AU19#2803#myo-ino-1-P 1    | 387     | 35.149 | 0.000786227 | 0.001053890 | 1.34 | 0.282 |
| 720 | 1323AU19#2897#myo-ino-1-P 2    | 318     | 35.928 | 0.000123336 | 0.000178468 | 1.45 | 0.369 |
| 721 | 1323AU19#2897#myo-ino-1-P 2    | 387     | 35.928 | 0.000040539 | 0.000099348 | 2.45 | 0.030 |
| 722 | 1323AU19#2897#myo-ino-1-P 2    | 494     | 35.928 | 0.000020742 | 0.000023138 | 1.12 | 0.836 |
| 723 | 1323AU30#3400#isomaltose       | 361     | 40.963 | 0.000826632 | 0.004583665 | 5.54 | 0.001 |
| 724 | 1323AU30#3400#isomaltose       | 160     | 40.963 | 0.000764665 | 0.001730869 | 2.26 | 0.003 |
| 725 | 1323AU30#3400#isomaltose       | 480     | 40.963 | 0.000099379 | 0.000220844 | 2.22 | 0.016 |
| 726 | 1323AU39#2079#ononitol         | 265     | 28.275 | 0.000602146 | 0.000390218 | 0.65 | 0.014 |
| 727 | 1323AU39#2079#ononitol         | 318     | 28.275 | 0.002368315 | 0.002112657 | 0.89 | 0.524 |
| 728 | 1323AU39#2079#ononitol         | 507     | 28.275 | 0.000097099 | 0.000120000 | 1.24 | 0.706 |
| 729 | 1324BK14#2728#glc-6-P MX1      | 160     | 33.886 | 0.003242064 | 0.005920542 | 1.83 | 0.309 |
| 730 | 1324BK14#2752#glc-6-P MX2      | 299     | 34.122 | 0.001504212 | 0.002856144 | 1.90 | 0.337 |
| 731 | 1324BK14#2752#glc-6-P MX2      | 471     | 34.122 | 0.000101908 | 0.000277614 | 2.72 | 0.009 |
| 732 | 1324BK16#2662#fru-6-P MX       | 459     | 33.716 | 0.000232597 | 0.000454471 | 1.95 | 0.202 |
| 733 | 1324BK20#2928#gluconic-6-P     | 299     | 35.281 | 0.000436036 | 0.000564788 | 1.30 | 0.830 |
| 734 | 1324BK20#2928#gluconic-6-P     | 387     | 35.281 | 0.000257226 | 0.000079429 | 0.31 | 0.395 |
| 735 | 1324BK22#2721#man-6-P MX1      | 387     | 33.720 | 0.001759484 | 0.002106938 | 1.20 | 0.631 |
| 736 | 1324BK22#2721#man-6-P MX1      | 160     | 33.720 | 0.002696721 | 0.002166926 | 0.80 | 0.513 |
| 737 | 1324BK22#2739#man-6-P MX2      | 387     | 33.893 | 0.006143945 | 0.012546310 | 2.04 | 0.222 |
| 738 | 1324BK23#1767#glyceral-3-P MX1 | 384     | 24.156 | 0.000036747 | 0.000039597 | 1.08 | 0.847 |
| 739 | 1324BK23#1767#glyceral-3-P MX1 | 299     | 24.156 | 0.000202575 | 0.000333914 | 1.65 | 0.261 |
| 740 | 1324BK23#1792#glyceral-3-P MX2 | 328     | 24.394 | 0.000354186 | 0.000693751 | 1.96 | 0.349 |
| 741 | 1324BK23#1792#glyceral-3-P MX2 | 299     | 24.395 | 0.000098545 | 0.000276464 | 2.81 | 0.204 |
| 742 | 1324BK24#1877#glycerol-1-P     | 357     | 25.120 | 0.001718641 | 0.007328176 | 4.26 | 0.005 |
| 743 | 1324BK24#1877#glycerol-1-P     | 299     | 25.120 | 0.002180520 | 0.008965429 | 4.11 | 0.009 |
| 744 | 1324BK31#2823#myo-ino-2-P 1    | 387     | 35.131 | 0.000776936 | 0.001075467 | 1.38 | 0.247 |
| 745 | 1324BK31#2898#myo-ino-2-P 2    | 387     | 35.873 | 0.000046045 | 0.000092605 | 2.01 | 0.063 |
| 746 | 1324BK31#2898#myo-ino-2-P 2    | 318     | 35.873 | 0.000099886 | 0.000140998 | 1.41 | 0.550 |
| 747 | 1325BK16#0403#d4-alanine 2     | 120     | 11.028 | 0.004203700 | 0.012983767 | 3.09 | 0.126 |
| 748 | 1325BK16#0914#g-aminobutyric 2 | 102     | 15.830 | 0.003862382 | 0.010680069 | 2.77 | 0.096 |
| 749 | 1325BK16#0914#g-aminobutyric 2 | 232     | 15.830 | 0.006551407 | 0.000786756 | 0.12 | 0.003 |

|     |                      |     |        |             |             |      |       |
|-----|----------------------|-----|--------|-------------|-------------|------|-------|
| 750 | 1325BK16#1034        | 266 | 16.936 | 0.392518663 | 0.349434784 | 0.89 | 0.797 |
| 751 | 1325BK16#1034        | 192 | 16.936 | 2.294199254 | 2.045341588 | 0.89 | 0.710 |
| 752 | 1325BK16#1302        | 338 | 19.407 | 0.021210130 | 0.021824867 | 1.03 | 0.925 |
| 753 | 1325BK16#1302        | 236 | 19.407 | 0.210969371 | 0.213789643 | 1.01 | 0.967 |
| 754 | 1325BK16#1308        | 232 | 19.462 | 0.013387329 | 0.012219066 | 0.91 | 0.754 |
| 755 | 1325BK16#1403        | 283 | 20.347 | 0.004564665 | 0.004284849 | 0.94 | 0.629 |
| 756 | 1325BK16#1537        | 247 | 21.624 | 0.003870518 | 0.005987373 | 1.55 | 0.010 |
| 757 | 1325BK16#1537        | 349 | 21.624 | 0.000813863 | 0.001117896 | 1.37 | 0.006 |
| 758 | 1325BK16#1546        | 306 | 21.692 | 0.013269528 | 0.005004901 | 0.38 | 0.001 |
| 759 | 1325BK16#1552        | 142 | 21.757 | 0.022598729 | 0.023352583 | 1.03 | 0.878 |
| 760 | 1325BK16#1552        | 186 | 21.757 | 0.021831800 | 0.022481160 | 1.03 | 0.899 |
| 761 | 1325BK16#1589        | 273 | 22.099 | 0.012311294 | 0.019899905 | 1.62 | 0.002 |
| 762 | 1325BK16#1610        | 160 | 22.293 | 0.002080495 | 0.000930834 | 0.45 | 0.083 |
| 763 | 1325BK16#1749        | 159 | 23.595 | 0.000925836 | 0.002028459 | 2.19 | 0.024 |
| 764 | 1325BK16#1900        | 273 | 25.004 | 0.065180086 | 0.032548430 | 0.50 | 0.001 |
| 765 | 1325BK16#1946        | 174 | 25.435 | 0.001789102 | 0.003946899 | 2.21 | 0.050 |
| 766 | 1325BK16#1946        | 299 | 25.435 | 0.002247583 | 0.004397340 | 1.96 | 0.163 |
| 767 | 1325BK16#2257        | 203 | 28.362 | 0.004072425 | 0.012724551 | 3.12 | 0.001 |
| 768 | 1325BK16#2261        | 299 | 28.410 | 0.016355291 | 0.012825961 | 0.78 | 0.029 |
| 769 | 1325BK16#2261        | 204 | 28.410 | 0.008811747 | 0.011456275 | 1.30 | 0.546 |
| 770 | 1325BK16#2280        | 284 | 28.593 | 0.000099953 | 0.000098895 | 0.99 | 0.978 |
| 771 | 1325BK16#2280        | 244 | 28.593 | 0.000502694 | 0.000287590 | 0.57 | 0.108 |
| 772 | 1325BK16#2372        | 185 | 29.448 | 0.000354086 | 0.000346539 | 0.98 | 0.955 |
| 773 | 1325BK16#2500#uric 4 | 456 | 30.735 | 0.002418770 | 0.002542018 | 1.05 | 0.885 |
| 774 | 1325BK16#2500#uric 4 | 441 | 30.735 | 0.002906701 | 0.003171631 | 1.09 | 0.805 |
| 775 | 1325BK16#2538        | 319 | 31.100 | 0.014903012 | 0.015262368 | 1.02 | 0.872 |
| 776 | 1325BK16#2547        | 319 | 31.189 | 0.017640559 | 0.018837152 | 1.07 | 0.650 |
| 777 | 1325BK16#2620        | 199 | 31.914 | 0.000215040 | 0.000151902 | 0.71 | 0.256 |
| 778 | 1325BK16#2633        | 263 | 32.041 | 0.001139714 | 0.000113758 | 0.10 | 0.075 |
| 779 | 1325BK16#2721        | 179 | 32.913 | 0.000860283 | 0.001022724 | 1.19 | 0.065 |
| 780 | 1325BK16#2781        | 250 | 33.500 | 0.000647798 | 0.000870870 | 1.34 | 0.446 |
| 781 | 1325BK16#2785        | 246 | 33.539 | 0.000128766 | 0.000700161 | 5.44 | 0.396 |
| 782 | 1325BK16#2906        | 387 | 34.720 | 0.000072381 | 0.000042420 | 0.59 | 0.553 |
| 783 | 1325BK16#2906        | 299 | 34.720 | 0.000230456 | 0.000168876 | 0.73 | 0.474 |
| 784 | 1325BK16#2954        | 390 | 35.184 | 0.000088178 | 0.000195626 | 2.22 | 0.058 |
| 785 | 1325BK16#2978        | 348 | 35.419 | 0.000059854 | 0.000053557 | 0.89 | 0.560 |
| 786 | 1325BK16#3052        | 374 | 36.146 | 0.000050731 | 0.000061800 | 1.22 | 0.305 |
| 787 | 1325BK16#3060        | 374 | 36.226 | 0.000037747 | 0.000136775 | 3.62 | 0.299 |
| 788 | 1325BK16#3075        | 374 | 36.376 | 0.000059590 | 0.000103721 | 1.74 | 0.233 |
| 789 | 1325BK16#3075        | 260 | 36.376 | 0.000132421 | 0.000106969 | 0.81 | 0.461 |
| 790 | 1325BK16#3089        | 204 | 36.514 | 0.155087661 | 0.128867409 | 0.83 | 0.211 |
| 791 | 1325BK16#3089        | 421 | 36.514 | 0.000027735 | 0.000026601 | 0.96 | 0.902 |
| 792 | 1325BK16#3138        | 462 | 37.006 | 0.000026460 | 0.000017571 | 0.66 | 0.366 |
| 793 | 1325BK16#3138        | 204 | 37.006 | 0.015291701 | 0.007596522 | 0.50 | 0.004 |
| 794 | 1325BK16#3148        | 473 | 37.105 | 0.000027467 | 0.000021958 | 0.80 | 0.434 |
| 795 | 1325BK16#3171        | 271 | 37.336 | 0.002601677 | 0.003564906 | 1.37 | 0.046 |
| 796 | 1325BK16#3184        | 186 | 37.464 | 0.000231723 | 0.000174526 | 0.75 | 0.453 |
| 797 | 1325BK16#3191        | 204 | 37.533 | 0.000893642 | 0.001082532 | 1.21 | 0.127 |
| 798 | 1325BK16#3191        | 117 | 37.533 | 0.002218649 | 0.001733855 | 0.78 | 0.523 |
| 799 | 1325BK16#3281        | 423 | 38.416 | 0.000281150 | 0.000223727 | 0.80 | 0.042 |
| 800 | 1325BK16#3284        | 349 | 38.446 | 0.000070024 | 0.000027399 | 0.39 | 0.062 |
| 801 | 1325BK16#3284        | 259 | 38.446 | 0.000228266 | 0.000211756 | 0.93 | 0.662 |
| 802 | 1325BK16#3293        | 156 | 38.535 | 0.000164490 | 0.000235833 | 1.43 | 0.307 |
| 803 | 1325BK16#3293        | 317 | 38.535 | 0.000125549 | 0.000138160 | 1.10 | 0.690 |
| 804 | 1325BK16#3299        | 450 | 38.593 | 0.000435583 | 0.000417039 | 0.96 | 0.818 |
| 805 | 1325BK16#3299        | 284 | 38.593 | 0.001230190 | 0.001267857 | 1.03 | 0.864 |
| 806 | 1325BK16#3311        | 175 | 38.712 | 0.000132556 | 0.000133865 | 1.01 | 0.982 |
| 807 | 1325BK16#3387        | 466 | 39.459 | 0.000212547 | 0.000167631 | 0.79 | 0.179 |
| 808 | 1325BK16#3387        | 262 | 39.459 | 0.000942458 | 0.000604774 | 0.64 | 0.022 |
| 809 | 1325BK16#3392        | 433 | 39.508 | 0.000276672 | 0.000277107 | 1.00 | 0.995 |
| 810 | 1325BK16#3414        | 160 | 39.724 | 0.001826301 | 0.001543936 | 0.85 | 0.430 |
| 811 | 1325BK16#3426        | 348 | 39.842 | 0.000499983 | 0.001044177 | 2.09 | 0.149 |
| 812 | 1325BK16#3481        | 355 | 40.380 | 0.000096562 | 0.000123711 | 1.28 | 0.569 |

|     |                                |     |        |             |             |       |       |
|-----|--------------------------------|-----|--------|-------------|-------------|-------|-------|
| 813 | 1325BK16#3496                  | 189 | 40.533 | 0.001011530 | 0.001415133 | 1.40  | 0.141 |
| 814 | 1325BK16#3496                  | 204 | 40.533 | 0.014319536 | 0.016260576 | 1.14  | 0.729 |
| 815 | 1325BK16#3521                  | 312 | 40.778 | 0.000075148 | 0.000060385 | 0.80  | 0.414 |
| 816 | 1325BK16#3530                  | 525 | 40.866 | 0.000028910 | 0.000042394 | 1.47  | 0.452 |
| 817 | 1325BK16#3530                  | 204 | 40.866 | 0.004849903 | 0.010008680 | 2.06  | 0.002 |
| 818 | 1325BK16#3530                  | 345 | 40.866 | 0.000157345 | 0.000196042 | 1.25  | 0.247 |
| 819 | 1325BK16#3549                  | 251 | 41.051 | 0.000079275 | 0.000077553 | 0.98  | 0.954 |
| 820 | 1325BK16#3549                  | 292 | 41.051 | 0.000069765 | 0.000123589 | 1.77  | 0.105 |
| 821 | 1325BK16#3566                  | 332 | 41.216 | 0.000835660 | 0.000976244 | 1.17  | 0.412 |
| 822 | 1325BK16#3566                  | 361 | 41.216 | 0.001078100 | 0.000913498 | 0.85  | 0.535 |
| 823 | 1325BK16#3571                  | 358 | 41.255 | 0.000029525 | 0.000026358 | 0.89  | 0.338 |
| 824 | 1325BK16#3607                  | 251 | 41.615 | 0.000132751 | 0.000196159 | 1.48  | 0.407 |
| 825 | 1325BK16#3607                  | 292 | 41.615 | 0.000058043 | 0.000059098 | 1.02  | 0.963 |
| 826 | 1325BK16#3614                  | 318 | 41.684 | 0.000068004 | 0.000215419 | 3.17  | 0.097 |
| 827 | 1325BK16#3622                  | 204 | 41.762 | 0.001675499 | 0.005869395 | 3.50  | 0.000 |
| 828 | 1325BK16#3663                  | 318 | 42.161 | 0.000399573 | 0.001352391 | 3.38  | 0.000 |
| 829 | 1325BK16#3692                  | 318 | 42.441 | 0.005849433 | 0.004124154 | 0.71  | 0.040 |
| 830 | 1325BK16#3703                  | 204 | 42.548 | 0.249269735 | 0.167629045 | 0.67  | 0.031 |
| 831 | 1325BK16#3703                  | 259 | 42.548 | 0.000458188 | 0.000305464 | 0.67  | 0.125 |
| 832 | 1325BK16#3802                  | 375 | 43.487 | 0.000049914 | 0.000093169 | 1.87  | 0.247 |
| 833 | 1325BK16#3802                  | 318 | 43.487 | 0.000099628 | 0.000161542 | 1.62  | 0.207 |
| 834 | 1325BK16#3825                  | 91  | 43.721 | 0.001920685 | 0.000285495 | 0.15  | 0.000 |
| 835 | 1325BK16#3825                  | 204 | 43.721 | 0.108633317 | 0.139753597 | 1.29  | 0.183 |
| 836 | 1325BK16#3923                  | 91  | 44.673 | 0.000273396 | 0.000226670 | 0.83  | 0.781 |
| 837 | 1325BK16#3923                  | 204 | 44.673 | 0.001544768 | 0.000384858 | 0.25  | 0.015 |
| 838 | 1325BK16#3944                  | 349 | 44.873 | 0.000037121 | 0.000021689 | 0.58  | 0.351 |
| 839 | 1325BK16#3976                  | 119 | 45.182 | 0.000298326 | 0.000176113 | 0.59  | 0.278 |
| 840 | 1325BK16#3976                  | 259 | 45.182 | 0.000483040 | 0.000067326 | 0.14  | 0.384 |
| 841 | 1325BK16#4011                  | 91  | 45.511 | 0.000187261 | 0.000168486 | 0.90  | 0.751 |
| 842 | 1325BK16#4011                  | 204 | 45.511 | 0.001018317 | 0.000385391 | 0.38  | 0.010 |
| 843 | 1325BK16#4041                  | 349 | 45.796 | 0.000027343 | 0.000023508 | 0.86  | 0.752 |
| 844 | 1325BK16#4304                  | 441 | 48.284 | 0.002715602 | 0.000657378 | 0.24  | 0.005 |
| 845 | 1331BK22#2910                  | 202 | 34.720 | 0.005973832 | 0.000230257 | 0.04  | 0.025 |
| 846 | 1331BK22#2910                  | 361 | 34.720 | 0.023804253 | 0.000463155 | 0.02  | 0.020 |
| 847 | 1333BN04#2233#galacturonic MX1 | 333 | 28.162 | 0.001961418 | 0.003265030 | 1.66  | 0.236 |
| 848 | 1333BN06#2264#galacturonic MX1 | 364 | 28.162 | 0.000391020 | 0.000408226 | 1.04  | 0.931 |
| 849 | 1333BN06#2295#galacturonic MX2 | 333 | 28.450 | 0.004474472 | 0.004592766 | 1.03  | 0.789 |
| 850 | 1333BN06#2376#saccharic        | 373 | 29.206 | 0.000203019 | 0.000291900 | 1.44  | 0.024 |
| 851 | 1333BN07#2253                  | 243 | 28.406 | 0.003828509 | 0.008568397 | 2.24  | 0.098 |
| 852 | 1333BN09#2268                  | 333 | 28.910 | 0.012238992 | 0.010952808 | 0.89  | 0.306 |
| 853 | 1333BN09#2268                  | 292 | 28.910 | 0.035508582 | 0.032432394 | 0.91  | 0.307 |
| 854 | 1334BV09#1143#O-acet-serine    | 174 | 17.897 | 0.009086195 | 0.163410599 | 17.98 | 0.000 |
| 855 | 1334BV11#1880#putrescine 4     | 361 | 24.487 | 0.012351748 | 0.108022125 | 8.75  | 0.005 |
| 856 | 1334BV11#1880#putrescine 4     | 214 | 24.487 | 0.062776060 | 0.581668340 | 9.27  | 0.007 |
| 857 | 1334BV11#1885                  | 256 | 24.533 | 0.013816426 | 0.153226962 | 11.09 | 0.000 |
| 858 | 1334BV12#1883                  | 174 | 24.533 | 0.084660183 | 2.608064105 | 30.81 | 0.107 |
| 859 | 1334BV12#1883                  | 213 | 24.533 | 0.024452240 | 0.267992749 | 10.96 | 0.000 |
| 860 | 1334BV12#1883                  | 314 | 24.533 | 0.022677872 | 0.244180448 | 10.77 | 0.000 |
| 861 | 1334BV17#1407#N-acet-serine    | 132 | 20.301 | 0.003022042 | 0.032041425 | 10.60 | 0.000 |
| 862 | 1334BV17#1407#N-acet-serine    | 186 | 20.301 | 0.003506709 | 0.057635046 | 16.44 | 0.002 |
| 863 | 1334BV17#1407#N-acet-serine    | 261 | 20.301 | 0.002693126 | 0.037844236 | 14.05 | 0.001 |
| 864 | 1334BV19#3944                  | 204 | 43.806 | 0.109429989 | 0.139860843 | 1.28  | 0.194 |
| 865 | 1334BV19#3944                  | 337 | 43.806 | 0.005248618 | 0.007429945 | 1.42  | 0.107 |
| 866 | 1334BV20#2975                  | 451 | 34.690 | 0.005047384 | 0.001317098 | 0.26  | 0.004 |
| 867 | 1334BV20#2975                  | 375 | 34.690 | 0.011289886 | 0.003210572 | 0.28  | 0.006 |
| 868 | 1334BV20#3961                  | 202 | 43.806 | 0.043999986 | 0.000663553 | 0.02  | 0.017 |
| 869 | 1334BV20#3961                  | 227 | 43.806 | 0.026608953 | 0.000726726 | 0.03  | 0.018 |
| 870 | 1334BV21#1152#O-acet-serine    | 116 | 17.897 | 0.004055226 | 0.058714472 | 14.48 | 0.000 |
| 871 | 1334BV21#1152#O-acet-serine    | 132 | 17.897 | 0.004093145 | 0.070672276 | 17.27 | 0.001 |
| 872 | 1334BV21#1407                  | 289 | 20.257 | 0.001074081 | 0.023348507 | 21.74 | 0.000 |
| 873 | 1334BV21#1407                  | 304 | 20.257 | 0.000446968 | 0.011360185 | 25.42 | 0.000 |
| 874 | 1334BV21#2181                  | 174 | 27.244 | 0.034973688 | 0.738332987 | 21.11 | 0.000 |
| 875 | 1334BV21#2181                  | 347 | 27.244 | 0.003314936 | 0.060086150 | 18.13 | 0.000 |

|     |               |     |        |             |             |       |       |
|-----|---------------|-----|--------|-------------|-------------|-------|-------|
| 876 | 1334BV21#2181 | 405 | 27.244 | 0.002473816 | 0.039854070 | 16.11 | 0.000 |
| 877 | 1334BV27#1828 | 392 | 24.032 | 0.004350965 | 0.003791136 | 0.87  | 0.114 |
| 878 | 1334BV27#1828 | 275 | 24.032 | 0.009385510 | 0.022997239 | 2.45  | 0.008 |
| 879 | 1334BV27#2301 | 257 | 28.358 | 0.013337056 | 0.002329144 | 0.17  | 0.073 |
| 880 | 1334BV27#2301 | 188 | 28.358 | 0.004869739 | 0.010860636 | 2.23  | 0.281 |
| 881 | 1334BV27#3745 | 361 | 41.695 | 0.003964068 | 0.000591456 | 0.15  | 0.031 |
| 882 | 1334BV27#3745 | 306 | 41.695 | 0.000629696 | 0.000099026 | 0.16  | 0.029 |
| 883 | 1334BV27#3745 | 217 | 41.695 | 0.004483537 | 0.000927861 | 0.21  | 0.003 |
| 884 | 1334BV27#3812 | 361 | 42.311 | 0.002709010 | 0.000067194 | 0.02  | 0.012 |
| 885 | 1334BV27#3812 | 319 | 42.311 | 0.000267308 | 0.000053513 | 0.20  | 0.027 |
| 886 | 1334BV27#3812 | 85  | 42.311 | 0.007159598 | 0.006543812 | 0.91  | 0.213 |
| 887 | 1334BV27#3844 | 140 | 42.609 | 0.011015187 | 0.000626439 | 0.06  | 0.014 |
| 888 | 1334BV27#3844 | 361 | 42.609 | 0.004742718 | 0.029754593 | 6.27  | 0.458 |
| 889 | 1334BV27#3844 | 169 | 42.609 | 0.001610349 | 0.039953006 | 24.81 | 0.221 |
| 890 | 1334BV27#3864 | 324 | 42.790 | 0.062216502 | 0.239242427 | 3.85  | 0.005 |
| 891 | 1334BV27#3864 | 361 | 42.790 | 0.048119579 | 0.185315779 | 3.85  | 0.006 |
| 892 | 1334BV27#3864 | 450 | 42.790 | 0.011830685 | 0.044833868 | 3.79  | 0.006 |
| 893 | 1334BV27#3887 | 361 | 42.991 | 0.026745618 | 0.185315779 | 6.93  | 0.005 |
| 894 | 1334BV27#3887 | 217 | 42.991 | 0.015274586 | 0.189972629 | 12.44 | 0.004 |
| 895 | 1334BV27#3887 | 169 | 42.991 | 0.006385576 | 0.086024407 | 13.47 | 0.004 |
| 896 | 1334BV27#3920 | 361 | 43.298 | 0.013064980 | 0.000181258 | 0.01  | 0.014 |
| 897 | 1334BV27#3920 | 217 | 43.298 | 0.010348406 | 0.000608449 | 0.06  | 0.003 |
| 898 | 1334BV27#3920 | 169 | 43.298 | 0.004019894 | 0.003616258 | 0.90  | 0.861 |
| 899 | 1334BV27#4011 | 130 | 44.138 | 0.027271852 | 0.000628659 | 0.02  | 0.005 |
| 900 | 1334BV27#4011 | 155 | 44.138 | 0.010339061 | 0.000301528 | 0.03  | 0.004 |
| 901 | 1334BV27#4011 | 361 | 44.138 | 0.015018230 | 0.000182855 | 0.01  | 0.006 |
| 902 | 1334BV27#4073 | 105 | 44.722 | 0.004929994 | 0.000249411 | 0.05  | 0.027 |
| 903 | 1334BV27#4073 | 361 | 44.722 | 0.002638386 | 0.000194642 | 0.07  | 0.055 |
| 904 | 1334BV27#4073 | 217 | 44.722 | 0.004426991 | 0.000908041 | 0.21  | 0.049 |
| 905 | 1334BV27#4103 | 257 | 45.004 | 0.005448439 | 0.000251630 | 0.05  | 0.031 |
| 906 | 1334BV27#4103 | 232 | 45.004 | 0.005308601 | 0.000237440 | 0.04  | 0.031 |
| 907 | 1334BV27#4103 | 379 | 45.004 | 0.000525749 | 0.000029520 | 0.06  | 0.024 |
| 908 | 1334BV28#1746 | 275 | 23.324 | 0.084929189 | 0.513936688 | 6.05  | 0.000 |
| 909 | 1334BV28#1746 | 244 | 23.324 | 0.011795950 | 0.070403464 | 5.97  | 0.000 |
| 910 | 1334BV28#1746 | 155 | 23.324 | 0.019998191 | 0.081543368 | 4.08  | 0.000 |
| 911 | 1334BV28#1779 | 243 | 23.526 | 0.021657851 | 0.586836563 | 27.10 | 0.002 |
| 912 | 1334BV28#1779 | 345 | 23.526 | 0.002812577 | 0.077952372 | 27.72 | 0.002 |
| 913 | 1334BV28#1779 | 317 | 23.526 | 0.002274373 | 0.070324799 | 30.92 | 0.004 |
| 914 | 1334BV28#1818 | 319 | 23.978 | 0.023137126 | 0.216732029 | 9.37  | 0.003 |
| 915 | 1334BV28#1818 | 304 | 23.978 | 0.010680376 | 0.093922974 | 8.79  | 0.003 |
| 916 | 1334BV28#1818 | 190 | 23.978 | 0.010751796 | 0.102683414 | 9.55  | 0.004 |
| 917 | 1334BV28#2060 | 231 | 26.208 | 0.023369149 | 0.015755046 | 0.67  | 0.036 |
| 918 | 1334BV28#2060 | 333 | 26.208 | 0.009080371 | 0.008458352 | 0.93  | 0.409 |
| 919 | 1334BV28#2060 | 480 | 26.208 | 0.004528019 | 0.004118759 | 0.91  | 0.302 |
| 920 | 1334BV28#2242 | 200 | 27.883 | 0.003687673 | 0.099314951 | 26.93 | 0.034 |
| 921 | 1334BV28#2242 | 389 | 27.883 | 0.000825111 | 0.054966912 | 66.62 | 0.040 |
| 922 | 1334BV28#2242 | 506 | 27.883 | 0.000140292 | 0.011368850 | 81.04 | 0.037 |
| 923 | 1334BV28#2287 | 347 | 28.308 | 0.005295558 | 0.011167139 | 2.11  | 0.077 |
| 924 | 1334BV28#2287 | 232 | 28.308 | 0.031189317 | 0.052665932 | 1.69  | 0.157 |
| 925 | 1334BV28#2287 | 449 | 28.308 | 0.011969745 | 0.020300755 | 1.70  | 0.137 |
| 926 | 1334BV28#2613 | 326 | 31.222 | 0.000087544 | 0.003527019 | 40.29 | 0.202 |
| 927 | 1334BV28#2613 | 290 | 31.222 | 0.001724716 | 0.008344119 | 4.84  | 0.159 |
| 928 | 1334BV28#2613 | 428 | 31.222 | 0.000143440 | 0.001868304 | 13.03 | 0.278 |
| 929 | 1334BV28#3011 | 204 | 35.139 | 0.003053046 | 0.036683618 | 12.02 | 0.007 |
| 930 | 1334BV28#3011 | 157 | 35.139 | 0.000812430 | 0.016080549 | 19.79 | 0.006 |
| 931 | 1334BV28#3011 | 191 | 35.139 | 0.001405901 | 0.008914300 | 6.34  | 0.007 |
| 932 | 1334BV28#3022 | 204 | 35.238 | 0.002218418 | 0.011483450 | 5.18  | 0.001 |
| 933 | 1334BV28#3022 | 157 | 35.238 | 0.001727343 | 0.012218594 | 7.07  | 0.002 |
| 934 | 1334BV28#3022 | 331 | 35.238 | 0.000312697 | 0.002240650 | 7.17  | 0.005 |
| 935 | 1334BV28#3050 | 105 | 35.495 | 0.015511504 | 0.022263301 | 1.44  | 0.030 |
| 936 | 1334BV28#3050 | 331 | 35.495 | 0.000822811 | 0.001320705 | 1.61  | 0.057 |
| 937 | 1334BV28#3050 | 217 | 35.495 | 0.015410082 | 0.021037324 | 1.37  | 0.033 |
| 938 | 1334BV28#3103 | 446 | 35.994 | 0.000395111 | 0.002456195 | 6.22  | 0.009 |

|      |                               |     |        |             |             |      |       |
|------|-------------------------------|-----|--------|-------------|-------------|------|-------|
| 939  | 1334BV28#3103                 | 415 | 35.994 | 0.000140138 | 0.000517503 | 3.69 | 0.006 |
| 940  | 1334BV28#3103                 | 217 | 35.994 | 0.001294322 | 0.001689344 | 1.31 | 0.330 |
| 941  | 1334BV28#3422                 | 406 | 38.997 | 0.018823414 | 0.022231914 | 1.18 | 0.382 |
| 942  | 1334BV28#3422                 | 217 | 38.997 | 0.039941698 | 0.043672716 | 1.09 | 0.484 |
| 943  | 1334BV28#3422                 | 495 | 38.997 | 0.001945613 | 0.002297338 | 1.18 | 0.394 |
| 944  | 1334BV28#3687                 | 324 | 41.474 | 0.002569239 | 0.007837611 | 3.05 | 0.009 |
| 945  | 1334BV28#3687                 | 450 | 41.474 | 0.000521726 | 0.001436315 | 2.75 | 0.018 |
| 946  | 1334BV28#3687                 | 361 | 41.474 | 0.002753850 | 0.006490918 | 2.36 | 0.017 |
| 947  | 1334BV28#3753                 | 204 | 42.076 | 0.014437639 | 0.075501826 | 5.23 | 0.014 |
| 948  | 1334BV28#3753                 | 357 | 42.076 | 0.000893397 | 0.004274767 | 4.78 | 0.017 |
| 949  | 1334BV28#3753                 | 239 | 42.076 | 0.001053638 | 0.004451979 | 4.23 | 0.017 |
| 950  | 1334BV28#3871                 | 354 | 43.152 | 0.008896718 | 0.026079622 | 2.93 | 0.013 |
| 951  | 1334BV28#3871                 | 361 | 43.152 | 0.006415680 | 0.014529180 | 2.26 | 0.020 |
| 952  | 1334BV28#3871                 | 450 | 43.152 | 0.001964858 | 0.005244587 | 2.67 | 0.016 |
| 953  | 1338AU05#2775#sorbitol-6-P    | 387 | 34.463 | 0.000041700 | 0.000035457 | 0.85 | 0.573 |
| 954  | 1338AU05#2775#sorbitol-6-P    | 299 | 34.463 | 0.000109531 | 0.000100622 | 0.92 | 0.893 |
| 955  | 1338AU05#2775#sorbitol-6-P    | 315 | 34.463 | 0.000074391 | 0.000063129 | 0.85 | 0.689 |
| 956  | 1338AU07#2713#gal-6-P MX1     | 299 | 33.813 | 0.008163370 | 0.014699516 | 1.80 | 0.367 |
| 957  | 1338AU07#2713#gal-6-P MX1     | 387 | 33.813 | 0.006132665 | 0.012120743 | 1.98 | 0.276 |
| 958  | 1338AU07#2713#gal-6-P MX1     | 160 | 33.813 | 0.003287054 | 0.005846945 | 1.78 | 0.338 |
| 959  | 1338AU07#2745#gal-6-P MX2     | 387 | 34.107 | 0.001204030 | 0.004399066 | 3.65 | 0.201 |
| 960  | 1338AU12#1860#glyceric-3-P    | 299 | 25.932 | 0.001678262 | 0.001121635 | 0.67 | 0.339 |
| 961  | 1338AU12#1860#glyceric-3-P    | 387 | 25.932 | 0.000268453 | 0.000374975 | 1.40 | 0.522 |
| 962  | 1338AU12#1860#glyceric-3-P    | 459 | 25.932 | 0.000163422 | 0.000204496 | 1.25 | 0.704 |
| 963  | 1340AU03#1851#p-aminobenzoic  | 266 | 26.300 | 0.000563279 | 0.000318876 | 0.57 | 0.113 |
| 964  | 1340AU03#1851#p-aminobenzoic  | 281 | 26.300 | 0.000320808 | 0.000119507 | 0.37 | 0.093 |
| 965  | 1340AU03#1851#p-aminobenzoic  | 222 | 26.300 | 0.001561693 | 0.001461098 | 0.94 | 0.204 |
| 966  | 1340AU04#0792#norleucine 2    | 158 | 16.236 | 0.000068509 | 0.000057603 | 0.84 | 0.625 |
| 967  | 1340AU04#0792#norleucine 2    | 232 | 16.236 | 0.000060091 | 0.000073987 | 1.23 | 0.615 |
| 968  | 1340AU04#0792#norleucine 2    | 260 | 16.236 | 0.000120309 | 0.000130559 | 1.09 | 0.843 |
| 969  | 1340AU06#1981#allantoin 4     | 331 | 27.205 | 0.148196400 | 0.094591856 | 0.64 | 0.160 |
| 970  | 1340AU06#1981#allantoin 4     | 431 | 27.205 | 0.025789898 | 0.012382578 | 0.48 | 0.115 |
| 971  | 1340AU06#1981#allantoin 4     | 446 | 27.205 | 0.026387175 | 0.013491883 | 0.51 | 0.114 |
| 972  | 1340AU06#2014#allantoin 5     | 518 | 27.512 | 0.000315686 | 0.001507020 | 4.77 | 0.012 |
| 973  | 1340AU06#2014#allantoin 5     | 428 | 27.512 | 0.000175653 | 0.001007275 | 5.73 | 0.010 |
| 974  | 1340AU06#2014#allantoin 5     | 403 | 27.512 | 0.000794188 | 0.000763283 | 0.96 | 0.853 |
| 975  | 1340AU07#1942#adenine         | 264 | 26.916 | 0.007312352 | 0.015959585 | 2.18 | 0.326 |
| 976  | 1340AU07#1942#adenine         | 279 | 26.916 | 0.049065109 | 0.002684258 | 0.05 | 0.413 |
| 977  | 1340AU07#1942#adenine         | 192 | 26.916 | 0.000474986 | 0.002284206 | 4.81 | 0.052 |
| 978  | 1340AU09#2378#guanine         | 352 | 31.071 | 0.000144995 | 0.000385813 | 2.66 | 0.186 |
| 979  | 1340AU09#2378#guanine         | 367 | 31.071 | 0.000083099 | 0.000053744 | 0.65 | 0.081 |
| 980  | 1340AU09#2378#guanine         | 264 | 31.071 | 0.000280837 | 0.000316066 | 1.13 | 0.702 |
| 981  | 1340AU10#1717#aconitic        | 285 | 24.894 | 0.002237659 | 0.002345888 | 1.05 | 0.900 |
| 982  | 1340AU10#1717#aconitic        | 375 | 24.894 | 0.002446725 | 0.002428808 | 0.99 | 0.989 |
| 983  | 1340AU10#1717#aconitic        | 229 | 24.894 | 0.006479458 | 0.007835813 | 1.21 | 0.646 |
| 984  | 1340AU11#2058#p-coumaric      | 249 | 28.101 | 0.001500275 | 0.002044022 | 1.36 | 0.298 |
| 985  | 1340AU11#2058#p-coumaric      | 293 | 28.101 | 0.001074832 | 0.000952654 | 0.89 | 0.837 |
| 986  | 1340AU11#2058#p-coumaric      | 308 | 28.101 | 0.001431556 | 0.001014328 | 0.71 | 0.257 |
| 987  | 1340AU12#1826#o-coumaric      | 293 | 25.885 | 0.001695880 | 0.004659821 | 2.75 | 0.164 |
| 988  | 1340AU12#1826#o-coumaric      | 308 | 25.885 | 0.000534078 | 0.000330469 | 0.62 | 0.083 |
| 989  | 1340AU12#1826#o-coumaric      | 161 | 25.885 | 0.006507706 | 0.002284241 | 0.35 | 0.006 |
| 990  | 1340AU14#3254#adenosine       | 322 | 38.986 | 0.000151936 | 0.000176038 | 1.16 | 0.444 |
| 991  | 1340AU14#3254#adenosine       | 465 | 38.986 | 0.000190414 | 0.000213741 | 1.12 | 0.581 |
| 992  | 1340AU14#3254#adenosine       | 540 | 38.986 | 0.000018203 | 0.000020084 | 1.10 | 0.772 |
| 993  | 1340AU15#2109#indole-3-acetic | 202 | 28.475 | 0.000413850 | 0.000406504 | 0.98 | 0.973 |
| 994  | 1340AU15#2109#indole-3-acetic | 319 | 28.475 | 0.001633804 | 0.003790824 | 2.32 | 0.023 |
| 995  | 1340AU15#2109#indole-3-acetic | 276 | 28.475 | 0.000234481 | 0.000349933 | 1.49 | 0.285 |
| 996  | 1340AU18#2564#spermidine      | 156 | 32.807 | 0.001595964 | 0.002834828 | 1.78 | 0.059 |
| 997  | 1340AU20#1028#S-me-cysteine 2 | 162 | 18.434 | 0.009563336 | 0.006860420 | 0.72 | 0.077 |
| 998  | 1340AU20#1028#S-me-cysteine 2 | 218 | 18.434 | 0.001656613 | 0.001813615 | 1.09 | 0.746 |
| 999  | 1340AU20#1028#S-me-cysteine 2 | 236 | 18.434 | 0.001295656 | 0.000883379 | 0.68 | 0.096 |
| 1000 | 1340AU21#0999#glutaric        | 158 | 18.132 | 0.001895168 | 0.001644215 | 0.87 | 0.329 |
| 1001 | 1340AU21#0999#glutaric        | 261 | 18.132 | 0.001410914 | 0.001171475 | 0.83 | 0.195 |



|      |                                |         |        |             |             |       |       |
|------|--------------------------------|---------|--------|-------------|-------------|-------|-------|
| 1002 | 1340AU21#0999#glutaric         | 233     | 18.132 | 0.000455565 | 0.000400003 | 0.88  | 0.560 |
| 1003 | 2009AU02#4302                  | 204     | 46.743 | 0.008601608 | 0.010899642 | 1.27  | 0.766 |
| 1004 | 2009AU02#4302                  | 191     | 46.743 | 0.000884790 | 0.001624871 | 1.84  | 0.025 |
| 1005 | 2009AU02#4302                  | 259     | 46.743 | 0.000092550 | 0.000305985 | 3.31  | 0.093 |
| 1006 | 2009AU04#3664#melibiose MX1    | 204     | 40.845 | 0.004849903 | 0.010008680 | 2.06  | 0.002 |
| 1007 | 2009AU04#3664#melibiose MX1    | 361     | 40.845 | 0.002279816 | 0.004761980 | 2.09  | 0.002 |
| 1008 | 2009AU04#3664#melibiose MX1    | 480     | 40.845 | 0.000100846 | 0.000219748 | 2.18  | 0.019 |
| 1009 | 2009AU04#4352#melezitose       | 361     | 47.192 | 0.000093308 | 0.000084114 | 0.90  | 0.776 |
| 1010 | 2009AU04#4352#melezitose       | 451     | 47.192 | 0.000054737 | 0.000028937 | 0.53  | 0.003 |
| 1011 | 2009AU04#4352#melezitose       | 271     | 47.192 | 0.000123304 | 0.000067687 | 0.55  | 0.093 |
| 1012 | 2009AU07#3699#melibiose MX2    | 204     | 41.168 | 0.004285912 | 0.003420647 | 0.80  | 0.382 |
| 1013 | 2009AU07#3699#melibiose MX2    | 361     | 41.168 | 0.001078100 | 0.000849479 | 0.79  | 0.410 |
| 1014 | 2009AU07#3699#melibiose MX2    | 160     | 41.168 | 0.000157661 | 0.000310383 | 1.97  | 0.097 |
| 1015 | 2009AU13#3506#trehalose        | 169     | 39.356 | 0.012377423 | 0.002274195 | 0.18  | 0.015 |
| 1016 | 2009AU13#3506#trehalose        | 361     | 39.356 | 0.046122174 | 0.011097267 | 0.24  | 0.015 |
| 1017 | 2015BV03#0799#serine 2         | 219     | 14.818 | 0.072644338 | 0.149085154 | 2.05  | 0.000 |
| 1018 | 2015BV03#1056#serine 3         | 204     | 17.133 | 0.622568870 | 1.240912724 | 1.99  | 0.001 |
| 1019 | 2015BV03#1056#serine 3         | 278     | 17.133 | 0.036998577 | 0.069834187 | 1.89  | 0.001 |
| 1020 | 2015BV30#2713#tryptamine       | 174     | 32.434 | 0.001483362 | 0.001596412 | 1.08  | 0.836 |
| 1021 | 2015BV30#2713#tryptamine       | 273     | 32.434 | 0.000158258 | 0.000111269 | 0.70  | 0.375 |
| 1022 | 2015BV30#2713#tryptamine       | 361     | 32.434 | 0.000145957 | 0.000104560 | 0.72  | 0.217 |
| 1023 | 2066BN03#1003#nicotine         | 84      | 16.891 | 0.001287869 | 0.000581321 | 0.45  | 0.150 |
| 1024 | 2066BN03#1003#nicotine         | 133     | 16.891 | 0.144565576 | 0.115405926 | 0.80  | 0.493 |
| 1025 | 2066BN03#1003#nicotine         | 161+162 | 16.891 | 0.000409969 | 0.015407551 | 37.58 | 0.280 |
| 1026 | 2066BN03#1003#nicotine         | 85      | 16.891 | 0.005736772 | 0.002026862 | 0.35  | 0.068 |
| 1027 | 2066BN03#1382#salicylic        | 267     | 20.265 | 0.003469429 | 0.006393407 | 1.84  | 0.002 |
| 1028 | 2066BN03#1382#salicylic        | 268     | 20.265 | 0.001078745 | 0.001683136 | 1.56  | 0.078 |
| 1029 | 2066BN03#1382#salicylic        | 209     | 20.265 | 0.000483532 | 0.001046594 | 2.16  | 0.001 |
| 1030 | 2066BN03#1382#salicylic        | 91      | 20.265 | 0.000694180 | 0.000833823 | 1.20  | 0.142 |
| 1031 | 2066BN03#1722#t-o-coumaric     | 190     | 23.300 | 0.002248344 | 0.002624052 | 1.17  | 0.521 |
| 1032 | 2066BN03#1722#t-o-coumaric     | 293     | 23.300 | 0.000355126 | 0.000199096 | 0.56  | 0.104 |
| 1033 | 2066BN03#1722#t-o-coumaric     | 308     | 23.300 | 0.004992539 | 0.001711330 | 0.34  | 0.201 |
| 1034 | 2066BN03#1722#t-o-coumaric     | 161     | 23.300 | 0.001830524 | 0.001875858 | 1.02  | 0.935 |
| 1035 | 2077BN06#1973#galactonic       | 333     | 28.978 | 0.012238992 | 0.010952808 | 0.89  | 0.306 |
| 1036 | 2077BN06#1973#galactonic       | 292     | 28.978 | 0.035521665 | 0.032524791 | 0.92  | 0.317 |
| 1037 | 2077BN06#1973#galactonic       | 423     | 28.978 | 0.000812158 | 0.000612431 | 0.75  | 0.024 |
| 1038 | 2077BN06#1973#galactonic       | 433     | 28.978 | 0.003399492 | 0.002766658 | 0.81  | 0.108 |
| 1039 | 2077BN07#1944#gulonic          | 333     | 28.433 | 0.004513554 | 0.004592766 | 1.02  | 0.863 |
| 1040 | 2077BN07#1944#gulonic          | 292     | 28.433 | 0.004203875 | 0.004628756 | 1.10  | 0.396 |
| 1041 | 2077BN07#1944#gulonic          | 423     | 28.433 | 0.000411491 | 0.000442735 | 1.08  | 0.437 |
| 1042 | 2077BN07#1944#gulonic          | 433     | 28.433 | 0.000474497 | 0.000504314 | 1.06  | 0.684 |
| 1043 | 2077BN11#1910#glucuronic MX1   | 333     | 28.018 | 0.006186908 | 0.005894209 | 0.95  | 0.675 |
| 1044 | 2077BN11#1910#glucuronic MX1   | 160     | 28.018 | 0.004203749 | 0.004398860 | 1.05  | 0.872 |
| 1045 | 2077BN11#1910#glucuronic MX1   | 423     | 28.018 | 0.000352530 | 0.000332621 | 0.94  | 0.578 |
| 1046 | 2077BN11#1932#glucuronic MX2   | 160     | 28.245 | 0.002518986 | 0.004992397 | 1.98  | 0.022 |
| 1047 | 2077BN11#1932#glucuronic MX2   | 292     | 28.245 | 0.004210982 | 0.004656918 | 1.11  | 0.373 |
| 1048 | 2077BN11#1932#glucuronic MX2   | 393     | 28.245 | 0.000123206 | 0.000150083 | 1.22  | 0.439 |
| 1049 | 2081BN03#2686#t-3,5ME4OHcin MX | 174     | 30.838 | 0.001636264 | 0.002673833 | 1.63  | 0.010 |
| 1050 | 2081BN03#2686#t-3,5ME4OHcin MX | 248     | 30.838 | 0.000189857 | 0.000097351 | 0.51  | 0.064 |
| 1051 | 2081BN03#2686#t-3,5ME4OHcin MX | 309     | 30.838 | 0.000262440 | 0.000168732 | 0.64  | 0.473 |
| 1052 | 2081BN04#2381#coniferyl alcol  | 324     | 28.143 | 0.000661614 | 0.000566395 | 0.86  | 0.775 |
| 1053 | 2081BN04#2381#coniferyl alcol  | 293     | 28.143 | 0.001079159 | 0.001596650 | 1.48  | 0.408 |
| 1054 | 2081BN04#2381#coniferyl alcol  | 235     | 28.143 | 0.000364793 | 0.002688395 | 7.37  | 0.079 |
| 1055 | 2081BN05#2389#t-3ME4OHcin MX2  | 248     | 28.252 | 0.000563515 | 0.000522330 | 0.93  | 0.806 |
| 1056 | 2081BN05#2389#t-3ME4OHcin MX2  | 279     | 28.252 | 0.000138544 | 0.000144614 | 1.04  | 0.952 |
| 1057 | 2081BN05#2389#t-3ME4OHcin MX2  | 218     | 28.252 | 0.003444470 | 0.007716649 | 2.24  | 0.383 |
| 1058 | 2081BN05#2406#t-3ME4OHcin MX1  | 279     | 28.437 | 0.000099421 | 0.000098286 | 0.99  | 0.983 |
| 1059 | 2081BN05#2406#t-3ME4OHcin MX1  | 248     | 28.437 | 0.000709725 | 0.000778562 | 1.10  | 0.810 |
| 1060 | 2081BN05#2406#t-3ME4OHcin MX1  | 218     | 28.437 | 0.009161682 | 0.011485940 | 1.25  | 0.645 |
| 1061 | 2081BN06#2646#sinapyl alcol    | 354     | 30.473 | 0.000386912 | 0.000453925 | 1.17  | 0.418 |
| 1062 | 2081BN06#2646#sinapyl alcol    | 234     | 30.473 | 0.001464015 | 0.002155653 | 1.47  | 0.464 |
| 1063 | 2081BN06#2646#sinapyl alcol    | 323     | 30.473 | 0.002039802 | 0.000903688 | 0.44  | 0.449 |
| 1064 | 2081BN09#3943                  | 556     | 41.942 | 0.000010638 | 0.000019784 | 1.86  | 0.381 |

|      |               |     |        |             |             |             |              |
|------|---------------|-----|--------|-------------|-------------|-------------|--------------|
| 1065 | 2081BN09#3943 | 526 | 41.942 | 0.000016760 | 0.000018454 | 1.10        | 0.692        |
| 1066 | 2081BN09#3943 | 279 | 41.942 | 0.000063736 | 0.000067018 | 1.05        | 0.901        |
| 1067 | 2081BN33#3156 | 174 | 35.040 | 0.000250457 | 0.000882451 | <b>3.52</b> | <b>0.023</b> |
| 1068 | 2081BN33#3156 | 324 | 35.040 | 0.000062316 | 0.000098920 | 1.59        | 0.413        |
| 1069 | 2081BN33#3156 | 455 | 35.040 | 0.000035340 | 0.000062426 | 1.77        | 0.147        |
| 1070 | 2081BN33#3665 | 556 | 39.454 | 0.000020337 | 0.000024701 | 1.21        | 0.414        |
| 1071 | 2081BN33#3665 | 526 | 39.454 | 0.000030311 | 0.000032646 | 1.08        | 0.817        |
| 1072 | 2081BN33#3665 | 279 | 39.454 | 0.000174720 | 0.000081187 | 0.46        | 0.158        |

| #  | NAME                           | Q_TRACE | PRED_RT | Induced starvation, date point 1 (i1) |             |              |              |
|----|--------------------------------|---------|---------|---------------------------------------|-------------|--------------|--------------|
|    |                                |         |         | Avg Resp nS                           | Avg Resp -S | R -S/nS      | P-value      |
| 1  | 1090DK05#4896#1-t-caffeoquinic | 307     | 46.502  | 0.000079536                           | 0.000298818 | 3.76         | 0.062        |
| 2  | 1090DK05#4896#1-t-caffeoquinic | 324     | 46.502  | 0.000057109                           | 0.000098541 | 1.73         | 0.242        |
| 3  | 1090DK05#4896#1-t-caffeoquinic | 219     | 46.502  | 0.000514380                           | 0.002562731 | <b>4.98</b>  | <b>0.030</b> |
| 4  | 1164CC35#1780#arginine 5       | 256     | 26.181  | 0.167328962                           | 0.106234318 | 0.63         | 0.112        |
| 5  | 1164CC35#1780#arginine 5       | 157     | 26.181  | 0.291330271                           | 0.187100668 | 0.64         | 0.135        |
| 6  | 1164CC37#1216                  | 243     | 20.159  | 0.273917152                           | 0.417623015 | <b>1.52</b>  | <b>0.010</b> |
| 7  | 1164CC37#1220                  | 142     | 20.257  | 0.010123145                           | 0.112789294 | <b>11.14</b> | <b>0.003</b> |
| 8  | 1164CC37#1267                  | 232     | 20.717  | 0.016558638                           | 0.025095706 | 1.52         | 0.061        |
| 9  | 1164CC37#1280                  | 155     | 20.807  | 1.033429183                           | 1.992170016 | 1.93         | 0.124        |
| 10 | 1164CC37#1378                  | 301     | 21.835  | 0.054948232                           | 0.264113854 | 4.81         | 0.133        |
| 11 | 1164CC37#1378                  | 227     | 21.835  | 0.134195167                           | 0.641424272 | 4.78         | 0.135        |
| 12 | 1164CC37#1378                  | 344     | 21.835  | 0.068603138                           | 0.342518938 | 4.99         | 0.124        |
| 13 | 1164CC37#1705#glutamine 3      | 156     | 25.296  | 3.205295159                           | 2.398060515 | 0.75         | 0.310        |
| 14 | 1164CC37#1705#glutamine 3      | 245     | 25.296  | 0.940728837                           | 3.242607793 | 3.45         | 0.071        |
| 15 | 1164CC37#1965                  | 204     | 28.073  | 1.792215604                           | 3.725224252 | <b>2.08</b>  | <b>0.000</b> |
| 16 | 1194BK05#2052#ornithine 4      | 420     | 25.990  | 0.054747914                           | 0.031255547 | 0.57         | 0.053        |
| 17 | 1194BK05#2052#ornithine 4      | 142     | 25.990  | 1.084312717                           | 0.616485015 | 0.57         | 0.053        |
| 18 | 1194BK05#2052#ornithine 4      | 174     | 25.990  | 0.557127341                           | 0.318085129 | 0.57         | 0.054        |
| 19 | 1194BK09#2389#glutamine 4      | 227     | 28.996  | 0.088961134                           | 0.275859124 | 3.10         | 0.108        |
| 20 | 1194BK09#2389#glutamine 4      | 317     | 28.996  | 0.021660720                           | 0.068371835 | 3.16         | 0.098        |
| 21 | 1194BK09#2389#glutamine 4      | 156     | 28.996  | 0.024154090                           | 0.071658637 | 2.97         | 0.112        |
| 22 | 1194BK11#1453#t-4-HO-proline   | 230     | 20.567  | 0.483326624                           | 1.274936169 | <b>2.64</b>  | <b>0.002</b> |
| 23 | 1194BK11#1453#t-4-HO-proline   | 140     | 20.567  | 0.117487587                           | 0.301589509 | <b>2.57</b>  | <b>0.005</b> |
| 24 | 1194BK11#1453#t-4-HO-proline   | 304     | 20.567  | 0.024913793                           | 0.000353232 | 0.01         | 0.267        |
| 25 | 1194BK15#1922#arginine 3       | 174     | 24.834  | 0.319877137                           | 0.161000070 | 0.50         | 0.105        |
| 26 | 1194BK15#1922#ornithine 3      | 174     | 24.834  | 0.319877137                           | 0.161000070 | 0.50         | 0.105        |
| 27 | 1194BK15#1922#ornithine 3      | 186     | 24.834  | 0.097428845                           | 0.041255267 | <b>0.42</b>  | <b>0.041</b> |
| 28 | 1194BK15#1922#ornithine 3      | 348     | 24.834  | 0.024580793                           | 0.011233161 | 0.46         | 0.068        |
| 29 | 1194BK15#2050#arginine 4       | 142     | 25.990  | 1.084312717                           | 0.616485015 | 0.57         | 0.053        |
| 30 | 1194BK20#2225#gal MX2          | 160     | 27.625  | 1.542994424                           | 1.017911379 | 0.66         | 0.270        |
| 31 | 1215BK02#1748#arabinose MX     | 217     | 23.253  | 0.043393485                           | 0.052438202 | 1.21         | 0.051        |
| 32 | 1215BK02#1748#arabinose MX     | 307     | 23.253  | 0.022496959                           | 0.027094815 | 1.20         | 0.060        |
| 33 | 1215BK02#1753#arabinose MX     | 160     | 23.253  | 0.011541727                           | 0.013189133 | <b>1.14</b>  | <b>0.032</b> |
| 34 | 1215BK03#1782#ribose MX        | 217     | 23.568  | 0.030204076                           | 0.045656872 | 1.51         | 0.172        |
| 35 | 1215BK04#1717#xylose MX1       | 307     | 22.988  | 0.004476995                           | 0.005432238 | <b>1.21</b>  | <b>0.018</b> |
| 36 | 1215BK04#1717#xylose MX1       | 160     | 22.988  | 0.001527768                           | 0.001896272 | 1.24         | 0.061        |
| 37 | 1215BK04#1738#xylose MX2       | 160     | 23.178  | 0.011468761                           | 0.013124992 | <b>1.14</b>  | <b>0.032</b> |
| 38 | 1215BK05#3504#maltose MX1      | 480     | 39.300  | 0.000612788                           | 0.000606515 | 0.99         | 0.976        |
| 39 | 1215BK05#3540#maltose MX2      | 204     | 39.594  | 0.016419375                           | 0.014467756 | 0.88         | 0.545        |
| 40 | 1215BK07#1896#fucose MX1       | 160     | 24.395  | 0.016253174                           | 0.018749771 | 1.15         | 0.052        |
| 41 | 1215BK07#1896#fucose MX1       | 160     | 24.395  | 0.016253174                           | 0.018749771 | 1.15         | 0.052        |
| 42 | 1215BK07#1896#fucose MX2       | 160     | 24.595  | 0.003469996                           | 0.003616314 | 1.04         | 0.738        |
| 43 | 1215BK07#1896#fucose MX2       | 117     | 24.595  | 0.035355704                           | 0.040566727 | 1.15         | 0.051        |
| 44 | 1215BK09#2256#mannitol         | 319     | 27.889  | 0.009567147                           | 1.082465462 | 113.14       | 0.177        |
| 45 | 1215BK09#2256#mannitol         | 307     | 27.889  | 0.001179954                           | 0.026595230 | 22.54        | 0.360        |
| 46 | 1215BK09#2256#mannitol         | 421     | 27.889  | 0.000480507                           | 0.000524945 | 1.09         | 0.838        |
| 47 | 1215BK11#1416#erythritol       | 205     | 20.277  | 0.012353262                           | 0.018436128 | <b>1.49</b>  | <b>0.003</b> |
| 48 | 1215BK11#1416#erythritol       | 320     | 20.277  | 0.001064997                           | 0.001682196 | <b>1.58</b>  | <b>0.001</b> |
| 49 | 1215BK11#1416#erythritol       | 293     | 20.277  | 0.001893939                           | 0.002885502 | <b>1.52</b>  | <b>0.001</b> |
| 50 | 1215BK12#2269#sorbitol         | 319     | 28.002  | 0.009567147                           | 0.013439492 | 1.40         | 0.231        |
| 51 | 1215BK12#2269#sorbitol         | 307     | 28.002  | 0.001179954                           | 0.001353076 | 1.15         | 0.390        |

|     |                                |     |        |             |             |      |       |
|-----|--------------------------------|-----|--------|-------------|-------------|------|-------|
| 52  | 1215BK12#2269#sorbitol         | 419 | 28.002 | 0.000198962 | 0.000201372 | 1.01 | 0.970 |
| 53  | 1215BK13#2273#galactitol       | 307 | 28.086 | 0.003154893 | 0.012125367 | 3.84 | 0.000 |
| 54  | 1215BK13#2273#galactitol       | 421 | 28.086 | 0.000086164 | 0.000346028 | 4.02 | 0.006 |
| 55  | 1215BK13#2273#galactitol       | 331 | 28.086 | 0.004026989 | 0.015910789 | 3.95 | 0.000 |
| 56  | 1215BK14#1835#xylitol          | 307 | 24.083 | 0.000529643 | 0.001122889 | 2.12 | 0.013 |
| 57  | 1215BK14#1835#xylitol          | 319 | 24.083 | 0.004309097 | 0.027907785 | 6.48 | 0.286 |
| 58  | 1215BK15#3625#maltitol         | 191 | 40.453 | 0.001797227 | 0.002285249 | 1.27 | 0.143 |
| 59  | 1215BK15#3625#maltitol         | 361 | 40.453 | 0.004712615 | 0.006003568 | 1.27 | 0.417 |
| 60  | 1215BK16#1857#rhamnose MX1     | 364 | 24.249 | 0.000544938 | 0.000574383 | 1.05 | 0.666 |
| 61  | 1215BK16#1867#rhamnose MX2     | 117 | 24.348 | 0.713928726 | 0.736626364 | 1.03 | 0.484 |
| 62  | 1215BK16#1867#rhamnose MX2     | 160 | 24.348 | 0.016253174 | 0.018749771 | 1.15 | 0.052 |
| 63  | 1215BK22#1328#citramalic       | 349 | 19.462 | 0.000069554 | 0.000158784 | 2.28 | 0.213 |
| 64  | 1215BK22#1328#citramalic       | 247 | 19.462 | 0.001145820 | 0.001552238 | 1.35 | 0.357 |
| 65  | 1215BK38#1269#homoserine 3     | 218 | 19.050 | 0.002919808 | 0.005809358 | 1.99 | 0.119 |
| 66  | 1215BK38#1269#homoserine 3     | 292 | 19.050 | 0.000121006 | 0.000218040 | 1.80 | 0.248 |
| 67  | 1215BK38#1557#a-kt-glutaric MX | 198 | 21.703 | 0.009177013 | 0.016888793 | 1.84 | 0.003 |
| 68  | 1215BK38#1557#a-kt-glutaric MX | 288 | 21.703 | 0.002797426 | 0.005242130 | 1.87 | 0.002 |
| 69  | 1215BK38#1557#a-kt-glutaric MX | 304 | 21.703 | 0.002501322 | 0.004390798 | 1.76 | 0.007 |
| 70  | 1215BK38#1724#homocysteine 3   | 234 | 23.251 | 0.002666533 | 0.003796230 | 1.42 | 0.016 |
| 71  | 1215BK38#1724#homocysteine 3   | 351 | 23.251 | 0.000065786 | 0.000321141 | 4.88 | 0.004 |
| 72  | 1215BK38#1724#homocysteine 3   | 261 | 23.251 | 0.000454264 | 0.000268311 | 0.59 | 0.047 |
| 73  | 1215BK38#2153#gal MX1          | 160 | 27.304 | 0.092016321 | 0.137591436 | 1.50 | 0.000 |
| 74  | 1215BK38#2153#gal MX1          | 319 | 27.304 | 0.191975241 | 0.284453241 | 1.48 | 0.008 |
| 75  | 1215BK38#2153#gal MX1          | 205 | 27.304 | 0.218791759 | 0.323524419 | 1.48 | 0.013 |
| 76  | 1215BK38#2207#c-ferulic        | 293 | 27.793 | 0.000383547 | 0.000557212 | 1.45 | 0.172 |
| 77  | 1215BK38#2207#c-ferulic        | 249 | 27.793 | 0.000593547 | 0.001570859 | 2.65 | 0.281 |
| 78  | 1215BK38#2207#c-ferulic        | 338 | 27.793 | 0.000200335 | 0.000332234 | 1.66 | 0.221 |
| 79  | 1215BK38#2439#c-sinapic        | 338 | 30.024 | 0.013642104 | 0.019684782 | 1.44 | 0.169 |
| 80  | 1215BK38#2439#c-sinapic        | 368 | 30.024 | 0.012986749 | 0.018981599 | 1.46 | 0.159 |
| 81  | 1215BK38#2439#c-sinapic        | 323 | 29.907 | 0.004625589 | 0.006619381 | 1.43 | 0.169 |
| 82  | 1219BK04#2184#galactonic-1,4-L | 334 | 27.254 | 0.106036542 | 0.036807737 | 0.35 | 0.083 |
| 83  | 1219BK04#2184#galactonic-1,4-L | 361 | 27.254 | 0.007581672 | 0.007561559 | 1.00 | 0.993 |
| 84  | 1219BK04#2184#galactonic-1,4-L | 466 | 27.254 | 0.028602108 | 0.048084809 | 1.68 | 0.595 |
| 85  | 1219BK05#2185#a-kt-gulonic MX  | 349 | 27.346 | 0.000591707 | 0.004358972 | 7.37 | 0.081 |
| 86  | 1219BK05#2185#a-kt-gulonic MX  | 186 | 27.346 | 0.082353893 | 0.003970169 | 0.05 | 0.000 |
| 87  | 1219BK07#2218#gulonic-1,4-L    | 333 | 27.850 | 0.005981050 | 0.007476963 | 1.25 | 0.062 |
| 88  | 1219BK07#2218#gulonic-1,4-L    | 466 | 27.850 | 0.000110384 | 0.000904110 | 8.19 | 0.299 |
| 89  | 1219BK07#2218#gulonic-1,4-L    | 243 | 27.850 | 0.017500823 | 0.018418976 | 1.05 | 0.912 |
| 90  | 1248BK08#0805                  | 117 | 14.496 | 0.013164621 | 0.009816398 | 0.75 | 0.128 |
| 91  | 1248BK08#0815#benzoic          | 179 | 14.591 | 0.016675653 | 0.037022454 | 2.22 | 0.219 |
| 92  | 1248BK08#0815#benzoic          | 105 | 14.591 | 0.013693310 | 0.032760354 | 2.39 | 0.229 |
| 93  | 1248BK08#0856#urea             | 189 | 14.931 | 0.008254447 | 0.023533901 | 2.85 | 0.009 |
| 94  | 1248BK08#0931#threonine 2      | 219 | 15.643 | 0.074659334 | 0.141681856 | 1.90 | 0.044 |
| 95  | 1248BK08#0931#threonine 2      | 117 | 15.643 | 0.249102014 | 0.458071475 | 1.84 | 0.049 |
| 96  | 1248BK08#0953#glycine 3        | 174 | 15.840 | 0.084702726 | 0.755919272 | 8.92 | 0.307 |
| 97  | 1248BK08#0953#glycine 3        | 248 | 15.840 | 0.012435599 | 0.121239214 | 9.75 | 0.317 |
| 98  | 1248BK08#0990                  | 306 | 16.178 | 0.000055946 | 0.000115239 | 2.06 | 0.420 |
| 99  | 1248BK08#1020                  | 184 | 16.441 | 0.033135922 | 0.027625416 | 0.83 | 0.124 |
| 100 | 1248BK08#1020                  | 285 | 16.441 | 0.010616519 | 0.008850108 | 0.83 | 0.197 |
| 101 | 1248BK08#1043#uracil 2         | 241 | 16.639 | 0.002322020 | 0.001209089 | 0.52 | 0.021 |
| 102 | 1248BK08#1056                  | 259 | 16.761 | 0.000171626 | 0.000444411 | 2.59 | 0.190 |
| 103 | 1248BK08#1107#thymine 2        | 255 | 17.231 | 0.000546213 | 0.000488076 | 0.89 | 0.557 |
| 104 | 1248BK08#1121                  | 257 | 17.348 | 0.000045707 | 0.000136858 | 2.99 | 0.103 |
| 105 | 1248BK08#1128                  | 141 | 17.420 | 0.011401265 | 0.038036197 | 3.34 | 0.226 |
| 106 | 1248BK08#1180                  | 142 | 17.888 | 0.002494724 | 0.004433290 | 1.78 | 0.042 |
| 107 | 1248BK08#1196                  | 259 | 18.041 | 0.000275771 | 0.000373169 | 1.35 | 0.521 |
| 108 | 1248BK08#1214                  | 242 | 18.194 | 0.000238537 | 0.000078435 | 0.33 | 0.252 |
| 109 | 1248BK08#1214                  | 234 | 18.194 | 0.958786135 | 0.007228242 | 0.01 | 0.266 |
| 110 | 1248BK08#1225                  | 104 | 18.293 | 0.003108907 | 0.004648785 | 1.50 | 0.066 |
| 111 | 1248BK08#1249#b-alanine 3      | 248 | 18.526 | 0.017631680 | 0.075706986 | 4.29 | 0.000 |
| 112 | 1248BK08#1249#b-alanine 3      | 290 | 18.526 | 0.004354206 | 0.019147530 | 4.40 | 0.001 |
| 113 | 1248BK08#1249#b-alanine 3      | 174 | 18.526 | 0.026786184 | 0.109357161 | 4.08 | 0.001 |
| 114 | 1248BK08#1308#homoserine 3     | 128 | 19.050 | 0.000985473 | 0.002139893 | 2.17 | 0.101 |

|     |                              |     |        |             |             |       |       |
|-----|------------------------------|-----|--------|-------------|-------------|-------|-------|
| 115 | 1248BK08#1340                | 255 | 19.313 | 0.002073476 | 0.002695995 | 1.30  | 0.631 |
| 116 | 1248BK08#1368                | 155 | 19.569 | 0.132426085 | 0.359946455 | 2.72  | 0.002 |
| 117 | 1248BK08#1368                | 229 | 19.565 | 0.007242958 | 0.018854208 | 2.60  | 0.004 |
| 118 | 1248BK08#1446                | 306 | 20.299 | 0.094872729 | 0.000686786 | 0.01  | 0.266 |
| 119 | 1248BK08#1463#methionine 2   | 176 | 20.453 | 0.009626605 | 0.013812261 | 1.43  | 0.029 |
| 120 | 1248BK08#1463#methionine 2   | 128 | 20.453 | 0.007328150 | 0.010583525 | 1.44  | 0.047 |
| 121 | 1248BK08#1527                | 120 | 21.054 | 0.021427396 | 0.046657872 | 2.18  | 0.010 |
| 122 | 1248BK08#1540#cysteine 3     | 294 | 21.171 | 0.013139968 | 0.004686397 | 0.36  | 0.181 |
| 123 | 1248BK08#1540#cysteine 3     | 220 | 21.171 | 0.002705183 | 0.003213002 | 1.19  | 0.537 |
| 124 | 1248BK08#1568                | 162 | 21.424 | 0.009146393 | 0.015178388 | 1.66  | 0.111 |
| 125 | 1248BK08#1568                | 218 | 21.424 | 0.020623358 | 0.034291250 | 1.66  | 0.106 |
| 126 | 1248BK08#1630                | 188 | 21.984 | 0.094202353 | 0.060225889 | 0.64  | 0.569 |
| 127 | 1248BK08#1641                | 305 | 22.084 | 0.020095638 | 0.036121133 | 1.80  | 0.120 |
| 128 | 1248BK08#1669                | 142 | 22.339 | 0.078197622 | 0.059169875 | 0.76  | 0.480 |
| 129 | 1248BK08#1669                | 348 | 22.339 | 0.005728974 | 0.004667077 | 0.81  | 0.607 |
| 130 | 1248BK08#1695                | 188 | 22.592 | 0.004269003 | 0.007880586 | 1.85  | 0.164 |
| 131 | 1248BK08#1695                | 216 | 22.592 | 0.004945414 | 0.006256557 | 1.27  | 0.364 |
| 132 | 1248BK08#1841                | 275 | 23.932 | 0.103926798 | 0.309247231 | 2.98  | 0.065 |
| 133 | 1248BK08#1852                | 173 | 24.032 | 0.165062115 | 0.371383703 | 2.25  | 0.103 |
| 134 | 1248BK08#1888                | 156 | 24.340 | 0.005214382 | 0.014442780 | 2.77  | 0.326 |
| 135 | 1248BK08#1907                | 227 | 24.517 | 0.004595644 | 0.139369695 | 30.33 | 0.083 |
| 136 | 1248BK08#1907                | 203 | 24.517 | 0.003683253 | 0.109010688 | 29.60 | 0.088 |
| 137 | 1248BK08#1907                | 317 | 24.517 | 0.001470125 | 0.038030659 | 25.87 | 0.076 |
| 138 | 1248BK08#1940                | 216 | 24.844 | 0.000814643 | 0.006567923 | 8.06  | 0.094 |
| 139 | 1248BK08#1948                | 216 | 24.919 | 0.000643381 | 0.000452833 | 0.70  | 0.134 |
| 140 | 1248BK08#1969                | 333 | 25.113 | 0.003613626 | 0.006120138 | 1.69  | 0.016 |
| 141 | 1248BK08#1969                | 292 | 25.113 | 0.016941301 | 0.030052145 | 1.77  | 0.023 |
| 142 | 1248BK08#2056                | 461 | 25.911 | 0.000095318 | 0.000135137 | 1.42  | 0.468 |
| 143 | 1248BK08#2056                | 371 | 25.911 | 0.000457656 | 0.000183836 | 0.40  | 0.199 |
| 144 | 1248BK08#2056                | 257 | 25.911 | 0.001830260 | 0.003733185 | 2.04  | 0.089 |
| 145 | 1248BK08#2264#lysine 4       | 156 | 27.765 | 0.079515052 | 0.111311561 | 1.40  | 0.315 |
| 146 | 1248BK08#2264#lysine 4       | 317 | 27.765 | 0.043159194 | 0.058943070 | 1.37  | 0.363 |
| 147 | 1248BK08#2264#lysine 4       | 174 | 27.765 | 0.122920258 | 0.165201127 | 1.34  | 0.366 |
| 148 | 1248BK08#2323                | 217 | 28.410 | 0.041177688 | 0.046805965 | 1.14  | 0.746 |
| 149 | 1248BK08#2323                | 361 | 28.410 | 0.010281199 | 0.011317096 | 1.10  | 0.824 |
| 150 | 1248BK08#2406#saccharic      | 333 | 29.208 | 0.008843161 | 0.024052834 | 2.72  | 0.487 |
| 151 | 1248BK08#2411                | 433 | 29.287 | 0.000419061 | 0.000810866 | 1.93  | 0.004 |
| 152 | 1248BK08#2411                | 205 | 29.287 | 0.002434861 | 0.004935716 | 2.03  | 0.008 |
| 153 | 1248BK08#2429                | 393 | 29.460 | 0.002511606 | 0.003843848 | 1.53  | 0.248 |
| 154 | 1248BK08#2495                | 204 | 30.096 | 0.000587443 | 0.004330966 | 7.37  | 0.102 |
| 155 | 1248BK08#2495                | 539 | 30.096 | 0.000037509 | 0.000041255 | 1.10  | 0.855 |
| 156 | 1248BK08#2495                | 333 | 29.751 | 0.009554307 | 0.013489880 | 1.41  | 0.044 |
| 157 | 1248BK08#2568                | 245 | 30.794 | 0.000239873 | 0.000213530 | 0.89  | 0.848 |
| 158 | 1248BK08#2568                | 257 | 30.794 | 0.000119978 | 0.000213373 | 1.78  | 0.102 |
| 159 | 1248BK08#2568                | 292 | 30.794 | 0.000297389 | 0.000272146 | 0.92  | 0.858 |
| 160 | 1248BK08#2588                | 228 | 30.986 | 0.000161761 | 0.000289643 | 1.79  | 0.102 |
| 161 | 1248BK08#2664                | 437 | 31.721 | 0.000070996 | 0.000182953 | 2.58  | 0.017 |
| 162 | 1248BK08#2720#9,12(Z,Z)-18:2 | 337 | 32.269 | 0.000112005 | 0.000137367 | 1.23  | 0.443 |
| 163 | 1248BK08#2771                | 373 | 32.768 | 0.000036401 | 0.000112412 | 3.09  | 0.026 |
| 164 | 1248BK08#2796                | 373 | 33.013 | 0.000058373 | 0.000142985 | 2.45  | 0.000 |
| 165 | 1248BK08#2876                | 337 | 33.808 | 0.013032684 | 0.024730092 | 1.90  | 0.206 |
| 166 | 1248BK08#2876                | 217 | 33.820 | 0.025646278 | 0.049619892 | 1.93  | 0.131 |
| 167 | 1248BK08#2876                | 361 | 33.820 | 0.003926686 | 0.007652582 | 1.95  | 0.119 |
| 168 | 1248BK08#2949                | 433 | 34.530 | 0.000094039 | 0.000408305 | 4.34  | 0.016 |
| 169 | 1248BK08#2983                | 387 | 34.866 | 0.000097572 | 0.000117666 | 1.21  | 0.583 |
| 170 | 1248BK08#2983                | 299 | 34.866 | 0.000130823 | 0.000218099 | 1.67  | 0.278 |
| 171 | 1248BK08#3000                | 289 | 35.048 | 0.000132632 | 0.000140326 | 1.06  | 0.869 |
| 172 | 1248BK08#3018                | 334 | 35.216 | 0.000053391 | 0.000120206 | 2.25  | 0.020 |
| 173 | 1248BK08#3036                | 289 | 35.396 | 0.000087959 | 0.000094373 | 1.07  | 0.829 |
| 174 | 1248BK08#3036                | 334 | 35.396 | 0.000033168 | 0.000157836 | 4.76  | 0.058 |
| 175 | 1248BK08#3086                | 401 | 35.894 | 0.000055630 | 0.000101268 | 1.82  | 0.318 |
| 176 | 1248BK08#3086                | 437 | 35.894 | 0.000044315 | 0.000073712 | 1.66  | 0.141 |
| 177 | 1248BK08#3103                | 260 | 36.064 | 0.000080205 | 0.000189643 | 2.36  | 0.095 |

|     |                         |     |        |             |             |       |       |
|-----|-------------------------|-----|--------|-------------|-------------|-------|-------|
| 178 | 1248BK08#3131           | 446 | 36.344 | 0.000483611 | 0.003106614 | 6.42  | 0.046 |
| 179 | 1248BK08#3177           | 313 | 36.806 | 0.000092497 | 0.000219853 | 2.38  | 0.155 |
| 180 | 1248BK08#3192           | 387 | 36.957 | 0.000163788 | 0.000262900 | 1.61  | 0.449 |
| 181 | 1248BK08#3192           | 299 | 36.957 | 0.000130024 | 0.000330109 | 2.54  | 0.223 |
| 182 | 1248BK08#3192           | 471 | 36.957 | 0.000039661 | 0.000046746 | 1.18  | 0.651 |
| 183 | 1248BK08#3196           | 324 | 37.007 | 0.000061630 | 0.000090372 | 1.47  | 0.037 |
| 184 | 1248BK08#3223           | 287 | 37.271 | 0.000105256 | 0.000136225 | 1.29  | 0.424 |
| 185 | 1248BK08#3233           | 401 | 37.373 | 0.000058930 | 0.000060600 | 1.03  | 0.935 |
| 186 | 1248BK08#3359           | 491 | 38.628 | 0.000033325 | 0.000034993 | 1.05  | 0.891 |
| 187 | 1248BK08#3365           | 480 | 38.701 | 0.000082879 | 0.000090826 | 1.10  | 0.674 |
| 188 | 1248BK08#3365           | 307 | 38.701 | 0.000267098 | 0.000307687 | 1.15  | 0.254 |
| 189 | 1248BK08#3383           | 307 | 38.885 | 0.000720265 | 0.000787045 | 1.09  | 0.849 |
| 190 | 1248BK08#3385           | 295 | 38.914 | 0.001164723 | 0.001199603 | 1.03  | 0.911 |
| 191 | 1248BK08#3405           | 322 | 39.118 | 0.000054975 | 0.000075988 | 1.38  | 0.441 |
| 192 | 1248BK08#3412           | 473 | 39.178 | 0.000020649 | 0.000033262 | 1.61  | 0.474 |
| 193 | 1248BK08#3447           | 437 | 39.532 | 0.000682189 | 0.000592861 | 0.87  | 0.192 |
| 194 | 1248BK08#3456           | 361 | 39.623 | 0.003508373 | 0.005986102 | 1.71  | 0.136 |
| 195 | 1248BK08#3463           | 288 | 39.693 | 0.000068689 | 0.000093109 | 1.36  | 0.489 |
| 196 | 1248BK08#3468           | 437 | 39.743 | 0.000042171 | 0.000079954 | 1.90  | 0.371 |
| 197 | 1248BK08#3479           | 437 | 39.855 | 0.000082052 | 0.000110994 | 1.35  | 0.438 |
| 198 | 1248BK08#3581           | 539 | 40.856 | 0.000020089 | 0.000051384 | 2.56  | 0.085 |
| 199 | 1248BK08#3589           | 396 | 40.937 | 0.000016986 | 0.000034550 | 2.03  | 0.346 |
| 200 | 1248BK08#3589           | 361 | 40.937 | 0.000612122 | 0.004386675 | 7.17  | 0.100 |
| 201 | 1248BK08#3606           | 285 | 41.112 | 0.000038874 | 0.000081979 | 2.11  | 0.408 |
| 202 | 1248BK08#3627           | 296 | 41.303 | 0.000686902 | 0.000784353 | 1.14  | 0.500 |
| 203 | 1248BK08#3643           | 479 | 41.457 | 0.000017249 | 0.000060424 | 3.50  | 0.354 |
| 204 | 1248BK08#3773           | 446 | 42.694 | 0.000020399 | 0.000037005 | 1.81  | 0.474 |
| 205 | 1248BK08#3773           | 229 | 42.694 | 0.003050321 | 0.010158759 | 3.33  | 0.046 |
| 206 | 1248BK08#4003           | 259 | 44.854 | 0.000896672 | 0.000291327 | 0.32  | 0.003 |
| 207 | 1248BK08#4172#raffinose | 437 | 46.417 | 0.000585810 | 0.014206892 | 24.25 | 0.043 |
| 208 | 1248BK08#4172#raffinose | 451 | 46.417 | 0.000317022 | 0.006292299 | 19.85 | 0.079 |
| 209 | 1248BK08#4172#raffinose | 361 | 46.417 | 0.006285200 | 0.065023724 | 10.35 | 0.079 |
| 210 | 1248BK08#4180           | 437 | 46.509 | 0.000653147 | 0.014221955 | 21.77 | 0.044 |
| 211 | 1248BK08#4180           | 204 | 46.509 | 0.003010653 | 0.038294132 | 12.72 | 0.038 |
| 212 | 1248BK08#4180           | 217 | 46.509 | 0.007248624 | 0.039493267 | 5.45  | 0.041 |
| 213 | 1248BK08#4186           | 451 | 46.633 | 0.000276123 | 0.007340507 | 26.58 | 0.028 |
| 214 | 1250BK34#0703#dodecane  | 85  | 13.194 | 1.492788455 | 1.274547997 | 0.85  | 0.196 |
| 215 | 1263BK24#0843           | 174 | 14.907 | 1.280135532 | 1.315339691 | 1.03  | 0.780 |
| 216 | 1263BK24#0864#leucine 2 | 158 | 15.095 | 0.044805484 | 0.064605817 | 1.44  | 0.092 |
| 217 | 1263BK24#0864#leucine 2 | 232 | 15.095 | 0.001663093 | 0.002392216 | 1.44  | 0.067 |
| 218 | 1263BK24#0874#glycerol  | 117 | 15.184 | 0.082424207 | 0.091595690 | 1.11  | 0.699 |
| 219 | 1263BK24#0874#glycerol  | 205 | 15.184 | 0.127026836 | 0.139118109 | 1.10  | 0.767 |
| 220 | 1263BK24#0874#glycerol  | 218 | 15.184 | 0.044917551 | 0.044448704 | 0.99  | 0.960 |
| 221 | 1263BK24#0874#glycerol  | 293 | 15.184 | 0.003320116 | 0.003415034 | 1.03  | 0.881 |
| 222 | 1263BK24#0960           | 174 | 15.965 | 1.809069893 | 3.344890327 | 1.85  | 0.002 |
| 223 | 1263BK24#1089           | 156 | 17.123 | 0.000564870 | 0.001585713 | 2.81  | 0.012 |
| 224 | 1263BK24#1089           | 215 | 17.123 | 0.006819243 | 0.002570151 | 0.38  | 0.126 |
| 225 | 1263BK24#1215           | 219 | 18.264 | 0.003705056 | 0.006459895 | 1.74  | 0.042 |
| 226 | 1263BK24#1243           | 228 | 18.516 | 0.019882222 | 0.021789859 | 1.10  | 0.729 |
| 227 | 1263BK24#1446           | 188 | 20.361 | 0.003150685 | 0.003508623 | 1.11  | 0.623 |
| 228 | 1263BK24#1633           | 292 | 22.057 | 0.001535338 | 0.002631172 | 1.71  | 0.154 |
| 229 | 1263BK24#1633           | 117 | 22.057 | 0.000762673 | 0.002139785 | 2.81  | 0.067 |
| 230 | 1263BK24#1743           | 257 | 23.051 | 0.004398259 | 0.005631895 | 1.28  | 0.292 |
| 231 | 1263BK24#1785           | 150 | 23.426 | 0.000516343 | 0.000944177 | 1.83  | 0.038 |
| 232 | 1263BK24#1785           | 272 | 23.426 | 0.003988967 | 0.009666049 | 2.42  | 0.053 |
| 233 | 1263BK24#1861           | 303 | 24.109 | 0.003204489 | 0.004212960 | 1.31  | 0.025 |
| 234 | 1263BK24#1907           | 357 | 24.532 | 0.000239556 | 0.000366515 | 1.53  | 0.419 |
| 235 | 1263BK24#1910           | 416 | 24.554 | 0.000923494 | 0.002871167 | 3.11  | 0.245 |
| 236 | 1263BK24#1994           | 133 | 25.314 | 0.167981317 | 0.098722700 | 0.59  | 0.003 |
| 237 | 1263BK24#2004           | 244 | 25.433 | 0.003215760 | 0.002641528 | 0.82  | 0.656 |
| 238 | 1263BK24#2026           | 194 | 25.595 | 0.001002463 | 0.001994054 | 1.99  | 0.020 |
| 239 | 1263BK24#2047           | 437 | 25.800 | 0.001100987 | 0.002149669 | 1.95  | 0.080 |
| 240 | 1263BK24#2063           | 345 | 25.931 | 0.001541056 | 0.001869628 | 1.21  | 0.427 |



|     |                               |     |        |             |             |       |       |
|-----|-------------------------------|-----|--------|-------------|-------------|-------|-------|
| 241 | 1263BK24#2063                 | 435 | 25.931 | 0.001196003 | 0.001798530 | 1.50  | 0.155 |
| 242 | 1263BK24#2154                 | 144 | 26.771 | 0.000663898 | 0.001519562 | 2.29  | 0.140 |
| 243 | 1263BK24#2154                 | 307 | 26.771 | 0.001910096 | 0.001768339 | 0.93  | 0.880 |
| 244 | 1263BK24#2269                 | 234 | 27.828 | 0.015757784 | 0.027076814 | 1.72  | 0.452 |
| 245 | 1263BK24#2295#tyrosine        | 218 | 28.072 | 0.119112232 | 0.424428629 | 3.56  | 0.001 |
| 246 | 1263BK24#2295#tyrosine        | 280 | 28.072 | 0.006427960 | 0.019017132 | 2.96  | 0.047 |
| 247 | 1263BK24#2476                 | 319 | 29.726 | 0.079154535 | 0.000436460 | 0.01  | 0.090 |
| 248 | 1263BK24#2679                 | 300 | 31.578 | 0.000093672 | 0.000116249 | 1.24  | 0.485 |
| 249 | 1263BK24#2679                 | 228 | 31.578 | 0.000136987 | 0.000125553 | 0.92  | 0.784 |
| 250 | 1263BK24#2697                 | 458 | 31.740 | 0.000034047 | 0.000023837 | 0.70  | 0.179 |
| 251 | 1263BK24#2727                 | 235 | 32.014 | 0.000847624 | 0.004015289 | 4.74  | 0.001 |
| 252 | 1263BK24#2772                 | 328 | 32.434 | 0.005099231 | 0.006881891 | 1.35  | 0.569 |
| 253 | 1263BK24#2814#spermidine      | 174 | 32.824 | 0.001127094 | 0.006929034 | 6.15  | 0.035 |
| 254 | 1263BK24#2814#spermidine      | 144 | 32.824 | 0.001127079 | 0.007687041 | 6.82  | 0.047 |
| 255 | 1263BK24#2994                 | 351 | 34.452 | 0.000185294 | 0.003193731 | 17.24 | 0.003 |
| 256 | 1263BK24#3026                 | 329 | 34.745 | 0.000058921 | 0.000200944 | 3.41  | 0.214 |
| 257 | 1263BK24#3026                 | 318 | 34.745 | 0.000214221 | 0.000419535 | 1.96  | 0.216 |
| 258 | 1263BK24#3069                 | 338 | 35.147 | 0.000097441 | 0.000093639 | 0.96  | 0.903 |
| 259 | 1263BK24#3069                 | 144 | 35.147 | 0.000198747 | 0.000337435 | 1.70  | 0.250 |
| 260 | 1263BK24#3137                 | 174 | 35.772 | 0.000277977 | 0.000397167 | 1.43  | 0.373 |
| 261 | 1263BK24#3155                 | 174 | 35.937 | 0.000290480 | 0.000282640 | 0.97  | 0.932 |
| 262 | 1263BK24#3155                 | 398 | 35.937 | 0.000025863 | 0.000077972 | 3.01  | 0.301 |
| 263 | 1263BK24#3171                 | 174 | 36.084 | 0.000174821 | 0.000352990 | 2.02  | 0.075 |
| 264 | 1263BK24#3472                 | 204 | 38.850 | 0.009123981 | 0.008728171 | 0.96  | 0.840 |
| 265 | 1263BK24#4315                 | 174 | 46.628 | 0.000089236 | 0.000201532 | 2.26  | 0.034 |
| 266 | 1263BK24#4440                 | 174 | 47.803 | 0.000130254 | 0.000217921 | 1.67  | 0.232 |
| 267 | 1263BK25#0632                 | 86  | 13.044 | 0.043851232 | 0.038969975 | 0.89  | 0.891 |
| 268 | 1263BK25#2215                 | 191 | 27.318 | 0.025244043 | 0.247850109 | 9.82  | 0.346 |
| 269 | 1263BK25#2215                 | 204 | 27.318 | 0.033132172 | 0.312531092 | 9.43  | 0.147 |
| 270 | 1263BK25#3658                 | 267 | 40.547 | 0.000164290 | 0.000519003 | 3.16  | 0.418 |
| 271 | 1263BK50#2309                 | 299 | 28.231 | 0.003380097 | 0.003808248 | 1.13  | 0.542 |
| 272 | 1263BK50#2309                 | 360 | 28.231 | 0.000416627 | 0.000713588 | 1.71  | 0.051 |
| 273 | 1263BK50#2309                 | 494 | 28.231 | 0.000055195 | 0.000112598 | 2.04  | 0.037 |
| 274 | 1267BK12#0266                 | 207 | 9.830  | 0.060946405 | 0.021103630 | 0.35  | 0.383 |
| 275 | 1267BK12#0266                 | 295 | 9.830  | 0.161823737 | 0.072343239 | 0.45  | 0.267 |
| 276 | 1267BK12#0289#lactic          | 117 | 10.035 | 0.002980680 | 0.001587729 | 0.53  | 0.462 |
| 277 | 1267BK12#0289#lactic          | 219 | 10.035 | 0.005331779 | 0.007919514 | 1.49  | 0.282 |
| 278 | 1267BK12#0326                 | 173 | 10.400 | 7.213615266 | 8.656007535 | 1.20  | 0.643 |
| 279 | 1267BK12#0362                 | 217 | 10.685 | 0.337052512 | 0.233258333 | 0.69  | 0.459 |
| 280 | 1267BK12#0362                 | 202 | 10.685 | 2.930516473 | 1.953303465 | 0.67  | 0.636 |
| 281 | 1267BK12#0403#alanine 2       | 116 | 11.052 | 0.061103980 | 0.064074271 | 1.05  | 0.901 |
| 282 | 1267BK12#0422#hydroxylamine   | 133 | 11.221 | 0.166456745 | 0.094733433 | 0.57  | 0.619 |
| 283 | 1267BK12#0422#hydroxylamine   | 249 | 11.221 | 0.551248095 | 0.521349771 | 0.95  | 0.852 |
| 284 | 1267BK12#0494#cy-siloxane 5   | 267 | 11.864 | 0.019957579 | 0.021907763 | 1.10  | 0.509 |
| 285 | 1267BK12#0503                 | 219 | 11.945 | 0.168801495 | 0.108501396 | 0.64  | 0.309 |
| 286 | 1267BK12#0503                 | 190 | 11.945 | 0.005323078 | 0.002831125 | 0.53  | 0.627 |
| 287 | 1267BK12#0516                 | 235 | 12.061 | 0.064594202 | 0.031705106 | 0.49  | 0.373 |
| 288 | 1267BK12#0531                 | 142 | 12.194 | 0.039295150 | 0.099808981 | 2.54  | 0.077 |
| 289 | 1267BK12#0531                 | 174 | 12.194 | 0.007960302 | 0.000420727 | 0.05  | 0.267 |
| 290 | 1267BK12#0616#me-phosphoric 2 | 241 | 12.963 | 0.032555638 | 0.044964133 | 1.38  | 0.301 |
| 291 | 1267BK12#0666#dodecane        | 85  | 13.402 | 1.501045331 | 1.284268510 | 0.86  | 0.200 |
| 292 | 1267BK12#0688                 | 233 | 13.600 | 0.007967754 | 0.002572357 | 0.32  | 0.412 |
| 293 | 1267BK12#0707#valine 2        | 144 | 13.770 | 0.091535149 | 0.184213251 | 2.01  | 0.111 |
| 294 | 1267BK12#0707#valine 2        | 218 | 13.770 | 0.013294478 | 0.027880590 | 2.10  | 0.119 |
| 295 | 1267BK12#0725                 | 156 | 13.931 | 0.042077555 | 0.030450486 | 0.72  | 0.766 |
| 296 | 1267BK12#0737#siloxane 5      | 281 | 14.039 | 0.014458404 | 0.012453347 | 0.86  | 0.579 |
| 297 | 1267BK12#0784                 | 248 | 14.459 | 0.017345998 | 0.018112096 | 1.04  | 0.856 |
| 298 | 1267BK12#0824#serine 2        | 116 | 14.818 | 0.763745687 | 1.972033818 | 2.58  | 0.007 |
| 299 | 1267BK12#0824#serine 2        | 132 | 14.818 | 0.799824239 | 2.084349360 | 2.61  | 0.007 |
| 300 | 1267BK12#0848                 | 415 | 15.033 | 0.000264989 | 0.000526042 | 1.99  | 0.276 |
| 301 | 1267BK12#0848                 | 261 | 15.033 | 0.000145605 | 0.000795529 | 5.46  | 0.170 |
| 302 | 1267BK12#0858#phosphoric 3    | 299 | 15.123 | 1.980151881 | 2.618259747 | 1.32  | 0.018 |
| 303 | 1267BK12#0858#phosphoric 3    | 314 | 15.123 | 0.349342186 | 0.606087146 | 1.73  | 0.007 |

|     |                             |     |        |             |             |      |       |
|-----|-----------------------------|-----|--------|-------------|-------------|------|-------|
| 304 | 1267BK12#0909#isoleucine 2  | 158 | 15.580 | 0.038392901 | 0.076211091 | 1.99 | 0.018 |
| 305 | 1267BK12#0909#isoleucine 2  | 218 | 15.580 | 0.006844112 | 0.012971860 | 1.90 | 0.039 |
| 306 | 1267BK12#0917#proline 2     | 216 | 15.643 | 0.000518187 | 0.000648375 | 1.25 | 0.527 |
| 307 | 1267BK12#0917#proline 2     | 142 | 15.643 | 0.014141784 | 0.017241438 | 1.22 | 0.419 |
| 308 | 1267BK12#0923#nicotinic     | 136 | 15.697 | 0.006763623 | 0.011164121 | 1.65 | 0.006 |
| 309 | 1267BK12#0923#nicotinic     | 180 | 15.697 | 0.010514340 | 0.017050071 | 1.62 | 0.010 |
| 310 | 1267BK12#0931#cy-siloxane 6 | 341 | 15.777 | 0.004288978 | 0.011964445 | 2.79 | 0.393 |
| 311 | 1267BK12#0945#maleic        | 245 | 15.903 | 0.003917607 | 0.004850414 | 1.24 | 0.243 |
| 312 | 1267BK12#0945#maleic        | 147 | 15.903 | 0.045326068 | 0.059714144 | 1.32 | 0.088 |
| 313 | 1267BK12#0970#d4-succinic   | 251 | 16.127 | 0.000106409 | 0.000120899 | 1.14 | 0.472 |
| 314 | 1267BK12#0970#d4-succinic   | 251 | 16.127 | 0.000092726 | 0.000116080 | 1.25 | 0.321 |
| 315 | 1267BK12#0970#succinic      | 147 | 16.127 | 0.102302940 | 0.156763850 | 1.53 | 0.027 |
| 316 | 1267BK12#0970#succinic      | 147 | 16.127 | 0.104327076 | 0.158053640 | 1.51 | 0.022 |
| 317 | 1267BK12#0970#succinic      | 247 | 16.127 | 0.010247841 | 0.015670993 | 1.53 | 0.037 |
| 318 | 1267BK12#0970#succinic      | 247 | 16.127 | 0.010567034 | 0.015673119 | 1.48 | 0.046 |
| 319 | 1267BK12#0970#succinic      | 247 | 16.127 | 0.010247841 | 0.015670993 | 1.53 | 0.037 |
| 320 | 1267BK12#0970#succinic      | 147 | 16.127 | 0.102302940 | 0.156763850 | 1.53 | 0.027 |
| 321 | 1267BK12#0998               | 261 | 16.379 | 0.000049907 | 0.000043932 | 0.88 | 0.656 |
| 322 | 1267BK12#0998               | 147 | 16.379 | 0.104327076 | 0.158053640 | 1.51 | 0.022 |
| 323 | 1267BK12#1009#glyceric      | 189 | 16.478 | 0.106050462 | 0.330412760 | 3.12 | 0.002 |
| 324 | 1267BK12#1009#glyceric      | 292 | 16.478 | 0.060615188 | 0.192156817 | 3.17 | 0.003 |
| 325 | 1267BK12#1059#fumaric       | 147 | 16.926 | 0.380333021 | 0.863587838 | 2.27 | 0.038 |
| 326 | 1267BK12#1059#fumaric       | 245 | 16.926 | 0.266209831 | 0.522324846 | 1.96 | 0.017 |
| 327 | 1267BK12#1067               | 188 | 16.998 | 0.129254181 | 0.226819542 | 1.75 | 0.141 |
| 328 | 1267BK12#1082#serine 3      | 218 | 17.133 | 0.277161784 | 0.689574472 | 2.49 | 0.016 |
| 329 | 1267BK12#1102               | 306 | 17.313 | 0.001290396 | 0.000990467 | 0.77 | 0.002 |
| 330 | 1267BK12#1102               | 233 | 17.313 | 0.001116288 | 0.001220508 | 1.09 | 0.212 |
| 331 | 1267BK12#1114               | 247 | 17.421 | 0.002658131 | 0.004198746 | 1.58 | 0.007 |
| 332 | 1267BK12#1143#threonine 3   | 219 | 17.681 | 0.069514280 | 0.142296835 | 2.05 | 0.039 |
| 333 | 1267BK12#1143#threonine 3   | 291 | 17.681 | 0.024259897 | 0.049308629 | 2.03 | 0.039 |
| 334 | 1267BK12#1164               | 191 | 17.869 | 0.001262097 | 0.001516248 | 1.20 | 0.673 |
| 335 | 1267BK12#1175               | 197 | 17.968 | 0.002441256 | 0.002368281 | 0.97 | 0.912 |
| 336 | 1267BK12#1195               | 174 | 18.149 | 0.021048169 | 0.024218032 | 1.15 | 0.533 |
| 337 | 1267BK12#1220               | 174 | 18.373 | 0.039170590 | 0.046171535 | 1.18 | 0.481 |
| 338 | 1267BK12#1237               | 160 | 18.526 | 0.202023432 | 0.271182232 | 1.34 | 0.313 |
| 339 | 1267BK12#1247               | 247 | 18.616 | 0.012176385 | 0.010792513 | 0.89 | 0.196 |
| 340 | 1267BK12#1270               | 172 | 18.832 | 0.000311323 | 0.000390181 | 1.25 | 0.591 |
| 341 | 1267BK12#1278               | 174 | 18.895 | 0.003063287 | 0.003619930 | 1.18 | 0.484 |
| 342 | 1267BK12#1278               | 168 | 18.895 | 0.001498419 | 0.001835539 | 1.22 | 0.303 |
| 343 | 1267BK12#1298               | 350 | 19.025 | 0.004821303 | 0.006722522 | 1.39 | 0.135 |
| 344 | 1267BK12#1303               | 174 | 19.120 | 0.040809104 | 0.056788043 | 1.39 | 0.046 |
| 345 | 1267BK12#1309               | 174 | 19.174 | 0.047465926 | 0.056788043 | 1.20 | 0.368 |
| 346 | 1267BK12#1334               | 281 | 19.454 | 0.020394114 | 0.049046801 | 2.40 | 0.488 |
| 347 | 1267BK12#1345               | 173 | 19.498 | 0.010583796 | 0.009119736 | 0.86 | 0.076 |
| 348 | 1267BK12#1345               | 103 | 19.498 | 0.022410443 | 0.020398009 | 0.91 | 0.396 |
| 349 | 1267BK12#1369               | 234 | 19.715 | 0.008514856 | 0.009819436 | 1.15 | 0.400 |
| 350 | 1267BK12#1390#malic         | 233 | 19.916 | 0.218772765 | 0.446385597 | 2.04 | 0.058 |
| 351 | 1267BK12#1390#malic         | 335 | 19.916 | 0.034063104 | 0.069601464 | 2.04 | 0.043 |
| 352 | 1267BK12#1406#pentadecane   | 85  | 20.057 | 2.282241876 | 2.046191626 | 0.90 | 0.341 |
| 353 | 1267BK12#1410               | 217 | 20.105 | 0.017724263 | 0.011373815 | 0.64 | 0.088 |
| 354 | 1267BK12#1410               | 293 | 20.105 | 0.002435772 | 0.001791753 | 0.74 | 0.155 |
| 355 | 1267BK12#1428               | 111 | 20.239 | 0.006273744 | 0.008820515 | 1.41 | 0.281 |
| 356 | 1267BK12#1428               | 275 | 20.239 | 0.001147771 | 0.001419216 | 1.24 | 0.470 |
| 357 | 1267BK12#1438               | 237 | 20.347 | 0.009047921 | 0.008099855 | 0.90 | 0.367 |
| 358 | 1267BK12#1457#aspartic 3    | 218 | 20.518 | 0.116319145 | 0.169464507 | 1.46 | 0.081 |
| 359 | 1267BK12#1457#aspartic 3    | 232 | 20.518 | 0.638842425 | 0.957731789 | 1.50 | 0.070 |
| 360 | 1267BK12#1457#aspartic 3    | 306 | 20.518 | 0.014960001 | 0.021413974 | 1.43 | 0.098 |
| 361 | 1267BK12#1457#pyroglutamic  | 156 | 20.518 | 4.376125951 | 4.172515905 | 0.95 | 0.882 |
| 362 | 1267BK12#1457#pyroglutamic  | 258 | 20.518 | 0.547264242 | 1.395284730 | 2.55 | 0.003 |
| 363 | 1267BK12#1457#pyroglutamic  | 230 | 20.518 | 0.474995913 | 1.258247599 | 2.65 | 0.003 |
| 364 | 1267BK12#1485               | 84  | 20.771 | 0.175115688 | 0.297599417 | 1.70 | 0.010 |
| 365 | 1267BK12#1492               | 263 | 20.834 | 0.151623679 | 0.140632507 | 0.93 | 0.465 |
| 366 | 1267BK12#1507               | 292 | 20.970 | 0.143155315 | 0.202552458 | 1.41 | 0.307 |

|     |                               |     |        |             |             |      |         |
|-----|-------------------------------|-----|--------|-------------|-------------|------|---------|
| 367 | 1267BK12#1520                 | 249 | 21.069 | 0.000650359 | 0.001089254 | 1.67 | 0.390   |
| 368 | 1267BK12#1547#threonine       | 292 | 21.331 | 0.035462884 | 0.070931200 | 2.00 | 0.059   |
| 369 | 1267BK12#1547#threonine       | 220 | 21.331 | 0.021343512 | 0.043649227 | 2.05 | 0.052   |
| 370 | 1267BK12#1547#threonine       | 205 | 21.331 | 0.020101837 | 0.040294696 | 2.00 | 0.044   |
| 371 | 1267BK12#1569                 | 160 | 21.529 | 0.001343871 | 0.001738511 | 1.29 | 0.532   |
| 372 | 1267BK12#1587                 | 205 | 21.701 | 0.008941521 | 0.011202013 | 1.25 | 0.193   |
| 373 | 1267BK12#1609                 | 71  | 21.891 | 0.149182763 | 0.085836444 | 0.58 | 0.109   |
| 374 | 1267BK12#1609                 | 250 | 21.891 | 0.000297817 | 0.000393337 | 1.32 | 0.284   |
| 375 | 1267BK12#1627                 | 342 | 22.043 | 0.002151727 | 0.002332135 | 1.08 | 0.557   |
| 376 | 1267BK12#1631#asparagine 4    | 188 | 22.088 | 0.115085142 | 0.202930492 | 1.76 | 0.139   |
| 377 | 1267BK12#1631#asparagine 4    | 216 | 22.088 | 0.082515668 | 0.144087756 | 1.75 | 0.137   |
| 378 | 1267BK12#1631#asparagine 4    | 231 | 22.088 | 0.022517989 | 0.046029916 | 2.04 | 0.041   |
| 379 | 1267BK12#1674#glutamic 3      | 246 | 22.477 | 0.856551257 | 0.874560466 | 1.02 | 0.947   |
| 380 | 1267BK12#1674#glutamic 3      | 363 | 22.477 | 0.022608567 | 0.023683095 | 1.05 | 0.886   |
| 381 | 1267BK12#1680#phenylalanine 2 | 192 | 22.532 | 0.033685807 | 0.064651743 | 1.92 | 0.013   |
| 382 | 1267BK12#1680#phenylalanine 2 | 266 | 22.532 | 0.002538283 | 0.005096787 | 2.01 | 0.010   |
| 383 | 1267BK12#1733                 | 245 | 23.010 | 0.005649754 | 0.008248217 | 1.46 | 0.109   |
| 384 | 1267BK12#1751#xylose MX2      | 307 | 23.173 | 0.022507488 | 0.027094815 | 1.20 | 0.061   |
| 385 | 1267BK12#1751#xylose MX2      | 217 | 23.173 | 0.043393485 | 0.052826860 | 1.22 | 0.037   |
| 386 | 1267BK12#1765#arabinose MX2   | 307 | 23.299 | 0.018573591 | 0.017124508 | 0.92 | 0.809   |
| 387 | 1267BK12#1765#arabinose MX2   | 160 | 23.299 | 0.010597522 | 0.008246569 | 0.78 | 0.433   |
| 388 | 1267BK12#1779#asparagine 3    | 116 | 23.426 | 0.282012845 | 0.780298206 | 2.77 | 0.115   |
| 389 | 1267BK12#1779#asparagine 3    | 188 | 23.426 | 0.095610652 | 0.269780555 | 2.82 | 0.122   |
| 390 | 1267BK12#1794#ribose MX       | 307 | 23.570 | 0.012506332 | 0.019559516 | 1.56 | 0.281   |
| 391 | 1267BK12#1794#ribose MX       | 160 | 23.570 | 0.004602592 | 0.007366415 | 1.60 | 0.254   |
| 392 | 1267BK12#1809                 | 307 | 23.706 | 0.012506332 | 0.019559516 | 1.56 | 0.281   |
| 393 | 1267BK12#1824                 | 295 | 23.832 | 0.001936081 | 0.002323383 | 1.20 | 0.800   |
| 394 | 1267BK12#1824                 | 202 | 23.824 | 0.004095860 | 0.002961997 | 0.72 | 0.007   |
| 395 | 1267BK12#1827                 | 307 | 23.860 | 0.002942584 | 0.002072290 | 0.70 | 0.232   |
| 396 | 1267BK12#1837                 | 290 | 23.914 | 0.001564579 | 0.001192005 | 0.76 | 0.039   |
| 397 | 1267BK12#1846                 | 133 | 24.032 | 0.110275813 | 0.088195913 | 0.80 | 0.070   |
| 398 | 1267BK12#1849                 | 202 | 24.059 | 0.006868584 | 0.009215052 | 1.34 | 0.669   |
| 399 | 1267BK12#1859                 | 242 | 24.149 | 0.000645666 | 0.000801772 | 1.24 | 0.198   |
| 400 | 1267BK12#1859                 | 334 | 24.149 | 0.000898422 | 0.000826560 | 0.92 | 0.102   |
| 401 | 1267BK12#1870#rhamnose MX1    | 117 | 24.249 | 0.015807126 | 0.019407563 | 1.23 | 0.098   |
| 402 | 1267BK12#1870#rhamnose MX1    | 160 | 24.249 | 0.002877279 | 0.003413436 | 1.19 | 0.224   |
| 403 | 1267BK12#1877                 | 307 | 24.313 | 0.691198404 | 0.685480519 | 0.99 | 0.277   |
| 404 | 1267BK12#1885#ribitol         | 422 | 24.385 | 0.040775321 | 0.040699344 | 1.00 | 0.940   |
| 405 | 1267BK12#1885#ribitol         | 319 | 24.385 | 0.999813081 | 0.999164064 | 1.00 | 0.533   |
| 406 | 1267BK12#1885#ribitol TMS     | 319 | 24.395 | 1.000000000 | 1.000000000 | 1.00 | #DIV/0! |
| 407 | 1267BK12#1885#ribitol TMS     | 319 | 24.395 | 0.999813081 | 0.999164064 | 1.00 | 0.533   |
| 408 | 1267BK12#1885#ribitol TMS     | 307 | 24.395 | 0.691152815 | 0.685480519 | 0.99 | 0.281   |
| 409 | 1267BK12#1885#ribitol TMS     | 307 | 24.395 | 0.691198404 | 0.685480519 | 0.99 | 0.277   |
| 410 | 1267BK12#1885#ribitol TMS     | 422 | 24.395 | 0.040775321 | 0.040705833 | 1.00 | 0.945   |
| 411 | 1267BK12#1885#ribitol TMS     | 422 | 24.395 | 0.040775321 | 0.040699344 | 1.00 | 0.940   |
| 412 | 1267BK12#1896#putrescine 4    | 174 | 24.487 | 0.856353541 | 4.359915689 | 5.09 | 0.001   |
| 413 | 1267BK12#1903                 | 416 | 24.559 | 0.000516716 | 0.002398234 | 4.64 | 0.288   |
| 414 | 1267BK12#1908                 | 133 | 24.595 | 0.081123796 | 0.056854867 | 0.70 | 0.002   |
| 415 | 1267BK12#1916                 | 205 | 24.676 | 0.015565423 | 0.012590099 | 0.81 | 0.544   |
| 416 | 1267BK12#1918                 | 392 | 24.685 | 0.004569766 | 0.004040860 | 0.88 | 0.153   |
| 417 | 1267BK12#1918                 | 392 | 24.685 | 0.004974727 | 0.005593127 | 1.12 | 0.357   |
| 418 | 1267BK12#1925                 | 292 | 24.749 | 0.019555078 | 0.027067173 | 1.38 | 0.051   |
| 419 | 1267BK12#1925                 | 465 | 24.749 | 0.000025311 | 0.000020236 | 0.80 | 0.498   |
| 420 | 1267BK12#1940                 | 292 | 24.884 | 0.019555078 | 0.027067173 | 1.38 | 0.051   |
| 421 | 1267BK12#1940                 | 333 | 24.884 | 0.016919691 | 0.022551569 | 1.33 | 0.065   |
| 422 | 1267BK12#1946                 | 133 | 24.948 | 0.068390211 | 0.084170873 | 1.23 | 0.656   |
| 423 | 1267BK12#1953                 | 346 | 25.012 | 0.000495264 | 0.000417699 | 0.84 | 0.563   |
| 424 | 1267BK12#1953                 | 133 | 25.012 | 0.189525744 | 0.120475624 | 0.64 | 0.000   |
| 425 | 1267BK12#1961                 | 422 | 25.079 | 0.013438069 | 0.012643018 | 0.94 | 0.297   |
| 426 | 1267BK12#1961                 | 116 | 25.079 | 0.058172886 | 0.041826566 | 0.72 | 0.007   |
| 427 | 1267BK12#1967                 | 276 | 25.124 | 0.015772863 | 0.014645802 | 0.93 | 0.398   |
| 428 | 1267BK12#1967                 | 392 | 25.124 | 0.066549960 | 0.064261488 | 0.97 | 0.587   |
| 429 | 1267BK12#1967                 | 302 | 25.124 | 0.017369342 | 0.018451069 | 1.06 | 0.496   |

|     |                               |     |        |             |             |       |       |
|-----|-------------------------------|-----|--------|-------------|-------------|-------|-------|
| 430 | 1267BK12#1970                 | 319 | 25.166 | 0.007529586 | 0.009203670 | 1.22  | 0.143 |
| 431 | 1267BK12#1970                 | 275 | 25.166 | 0.000296326 | 0.000369863 | 1.25  | 0.160 |
| 432 | 1267BK12#1970                 | 392 | 25.166 | 0.066511322 | 0.064261488 | 0.97  | 0.595 |
| 433 | 1267BK12#1997                 | 392 | 25.401 | 0.003725270 | 0.003479394 | 0.93  | 0.623 |
| 434 | 1267BK12#2001                 | 436 | 25.437 | 0.000215625 | 0.001010320 | 4.69  | 0.014 |
| 435 | 1267BK12#2008                 | 292 | 25.501 | 0.029621927 | 0.015095877 | 0.51  | 0.487 |
| 436 | 1267BK12#2019                 | 312 | 25.595 | 0.001867986 | 0.003302020 | 1.77  | 0.024 |
| 437 | 1267BK12#2025                 | 392 | 25.655 | 0.017313398 | 0.016734836 | 0.97  | 0.918 |
| 438 | 1267BK12#2025                 | 249 | 25.655 | 0.000342705 | 0.000463123 | 1.35  | 0.142 |
| 439 | 1267BK12#2030                 | 392 | 25.709 | 0.022449514 | 0.020729450 | 0.92  | 0.401 |
| 440 | 1267BK12#2030                 | 317 | 25.709 | 0.002174931 | 0.003001770 | 1.38  | 0.491 |
| 441 | 1267BK12#2038                 | 292 | 25.782 | 0.003181102 | 0.006495016 | 2.04  | 0.007 |
| 442 | 1267BK12#2038                 | 333 | 25.782 | 0.003814488 | 0.007069956 | 1.85  | 0.009 |
| 443 | 1267BK12#2053                 | 244 | 25.909 | 0.008634563 | 0.005461757 | 0.63  | 0.295 |
| 444 | 1267BK12#2062#shikimic        | 204 | 25.990 | 0.092941606 | 0.100016542 | 1.08  | 0.697 |
| 445 | 1267BK12#2062#shikimic        | 462 | 25.990 | 0.000570554 | 0.000537172 | 0.94  | 0.543 |
| 446 | 1267BK12#2062#shikimic        | 372 | 25.990 | 0.000613749 | 0.000911344 | 1.48  | 0.514 |
| 447 | 1267BK12#2074#citric          | 375 | 26.100 | 0.058736565 | 0.082847326 | 1.41  | 0.092 |
| 448 | 1267BK12#2074#citric          | 273 | 26.100 | 0.329882143 | 0.468537783 | 1.42  | 0.080 |
| 449 | 1267BK12#2081#isocitric       | 319 | 26.172 | 0.011126896 | 0.011449582 | 1.03  | 0.912 |
| 450 | 1267BK12#2087                 | 304 | 26.208 | 0.004438611 | 0.005209561 | 1.17  | 0.330 |
| 451 | 1267BK12#2114                 | 316 | 26.461 | 0.000961957 | 0.024151706 | 25.11 | 0.000 |
| 452 | 1267BK12#2114                 | 206 | 26.461 | 0.004789721 | 0.002789309 | 0.58  | 0.028 |
| 453 | 1267BK12#2124#dehydroascorbic | 316 | 26.552 | 0.023580639 | 0.024151706 | 1.02  | 0.803 |
| 454 | 1267BK12#2124#dehydroascorbic | 173 | 26.552 | 0.063278983 | 0.065481849 | 1.03  | 0.710 |
| 455 | 1267BK12#2124#dehydroascorbic | 157 | 26.552 | 0.051897490 | 0.055038524 | 1.06  | 0.258 |
| 456 | 1267BK12#2145#quinic          | 255 | 26.743 | 0.000775365 | 0.000755714 | 0.97  | 0.935 |
| 457 | 1267BK12#2145#quinic          | 345 | 26.743 | 0.001075478 | 0.000502031 | 0.47  | 0.068 |
| 458 | 1267BK12#2151                 | 260 | 26.798 | 0.004125547 | 0.003886802 | 0.94  | 0.791 |
| 459 | 1267BK12#2162                 | 149 | 26.924 | 0.132117881 | 0.100180593 | 0.76  | 0.121 |
| 460 | 1267BK12#2171#fru MX1         | 307 | 26.980 | 7.292731572 | 6.537615174 | 0.90  | 0.398 |
| 461 | 1267BK12#2171#fru MX1         | 569 | 26.980 | 0.044512292 | 0.051834084 | 1.16  | 0.666 |
| 462 | 1267BK12#2177                 | 389 | 27.026 | 0.001851318 | 0.001726123 | 0.93  | 0.902 |
| 463 | 1267BK12#2177                 | 157 | 27.026 | 0.189508675 | 0.261720028 | 1.38  | 0.548 |
| 464 | 1267BK12#2181                 | 307 | 27.082 | 6.544848253 | 5.898442369 | 0.90  | 0.695 |
| 465 | 1267BK12#2181                 | 245 | 27.082 | 0.026000857 | 0.040848753 | 1.57  | 0.337 |
| 466 | 1267BK12#2190#fru MX2         | 307 | 27.154 | 6.164889793 | 4.967592894 | 0.81  | 0.400 |
| 467 | 1267BK12#2190#fru MX2         | 569 | 27.154 | 0.064266447 | 0.060287327 | 0.94  | 0.619 |
| 468 | 1267BK12#2196#man MX          | 160 | 27.208 | 0.032084538 | 0.045661305 | 1.42  | 0.325 |
| 469 | 1267BK12#2196#man MX          | 319 | 27.208 | 0.112572451 | 0.184917880 | 1.64  | 0.311 |
| 470 | 1267BK12#2216#glc MX1         | 160 | 27.390 | 3.735662814 | 5.305941687 | 1.42  | 0.179 |
| 471 | 1267BK12#2216#glc MX1         | 466 | 27.390 | 0.069419688 | 0.078918037 | 1.14  | 0.045 |
| 472 | 1267BK12#2220#nonadecane      | 85  | 27.429 | 3.273820273 | 2.930214653 | 0.90  | 0.315 |
| 473 | 1267BK12#2237#tyramine        | 174 | 27.591 | 0.014517794 | 0.017344755 | 1.19  | 0.064 |
| 474 | 1267BK12#2237#tyramine        | 338 | 27.591 | 0.000934898 | 0.000988794 | 1.06  | 0.489 |
| 475 | 1267BK12#2248#glc MX2         | 160 | 27.691 | 1.542994424 | 1.754981536 | 1.14  | 0.046 |
| 476 | 1267BK12#2248#glc MX2         | 319 | 27.691 | 2.480723371 | 2.673432694 | 1.08  | 0.156 |
| 477 | 1267BK12#2259                 | 242 | 27.791 | 0.002555075 | 0.001987936 | 0.78  | 0.372 |
| 478 | 1267BK12#2259                 | 389 | 27.791 | 0.000881970 | 0.000632068 | 0.72  | 0.220 |
| 479 | 1267BK12#2265                 | 244 | 27.846 | 0.003842063 | 0.004195799 | 1.09  | 0.518 |
| 480 | 1267BK12#2270                 | 362 | 27.891 | 0.001844148 | 0.002567003 | 1.39  | 0.380 |
| 481 | 1267BK12#2285                 | 229 | 28.027 | 0.002198128 | 0.003103619 | 1.41  | 0.269 |
| 482 | 1267BK12#2285                 | 330 | 28.027 | 0.000832283 | 0.000758149 | 0.91  | 0.483 |
| 483 | 1267BK12#2290#tyrosine        | 354 | 28.073 | 0.001636269 | 0.004729131 | 2.89  | 0.050 |
| 484 | 1267BK12#2298                 | 404 | 28.137 | 0.001176818 | 0.002040615 | 1.73  | 0.287 |
| 485 | 1267BK12#2298                 | 244 | 28.137 | 0.021208868 | 0.028807132 | 1.36  | 0.095 |
| 486 | 1267BK12#2309#L-ascorbic      | 332 | 28.246 | 0.001353888 | 0.002169299 | 1.60  | 0.022 |
| 487 | 1267BK12#2309#L-ascorbic      | 449 | 28.246 | 0.004217039 | 0.016733171 | 3.97  | 0.081 |
| 488 | 1267BK12#2309#L-ascorbic      | 464 | 28.246 | 0.000599348 | 0.001484287 | 2.48  | 0.128 |
| 489 | 1267BK12#2320#D-isoascorbic   | 332 | 28.348 | 0.001031248 | 0.001325831 | 1.29  | 0.393 |
| 490 | 1267BK12#2320#D-isoascorbic   | 332 | 28.348 | 0.001031248 | 0.001325831 | 1.29  | 0.393 |
| 491 | 1267BK12#2320#D-isoascorbic   | 449 | 28.348 | 0.008606248 | 0.016733171 | 1.94  | 0.214 |
| 492 | 1267BK12#2320#D-isoascorbic   | 449 | 28.348 | 0.008606248 | 0.016730413 | 1.94  | 0.215 |

|     |                              |     |        |             |             |       |       |
|-----|------------------------------|-----|--------|-------------|-------------|-------|-------|
| 493 | 1267BK12#2320#D-isoascorbic  | 464 | 28.348 | 0.000569894 | 0.000935637 | 1.64  | 0.188 |
| 494 | 1267BK12#2320#D-isoascorbic  | 464 | 28.348 | 0.000569894 | 0.000690806 | 1.21  | 0.694 |
| 495 | 1267BK12#2320#D-isoascorbic  | 332 | 28.348 | 0.001031248 | 0.001325831 | 1.29  | 0.393 |
| 496 | 1267BK12#2320#D-isoascorbic  | 464 | 28.348 | 0.000569894 | 0.000690806 | 1.21  | 0.694 |
| 497 | 1267BK12#2325                | 299 | 28.396 | 0.023264760 | 0.015171192 | 0.65  | 0.060 |
| 498 | 1267BK12#2336                | 420 | 28.496 | 0.000968962 | 0.000536788 | 0.55  | 0.001 |
| 499 | 1267BK12#2336                | 330 | 28.496 | 0.000363232 | 0.000223638 | 0.62  | 0.021 |
| 500 | 1267BK12#2341                | 420 | 28.550 | 0.000252389 | 0.000440137 | 1.74  | 0.063 |
| 501 | 1267BK12#2354                | 394 | 28.668 | 0.000081681 | 0.000109243 | 1.34  | 0.429 |
| 502 | 1267BK12#2364#c-caffeic      | 219 | 28.750 | 0.001439284 | 0.001311317 | 0.91  | 0.807 |
| 503 | 1267BK12#2364#c-caffeic      | 396 | 28.750 | 0.000082954 | 0.000097274 | 1.17  | 0.511 |
| 504 | 1267BK12#2364#c-caffeic      | 381 | 28.750 | 0.000085429 | 0.000056756 | 0.66  | 0.253 |
| 505 | 1267BK12#2370                | 204 | 28.806 | 0.035870846 | 0.060341147 | 1.68  | 0.077 |
| 506 | 1267BK12#2384                | 332 | 28.942 | 0.001058210 | 0.001377975 | 1.30  | 0.392 |
| 507 | 1267BK12#2384                | 190 | 28.942 | 0.001815158 | 0.004153461 | 2.29  | 0.171 |
| 508 | 1267BK12#2396                | 447 | 29.051 | 0.006185104 | 0.009049917 | 1.46  | 0.403 |
| 509 | 1267BK12#2401                | 190 | 29.079 | 0.001421102 | 0.002258087 | 1.59  | 0.504 |
| 510 | 1267BK12#2401                | 230 | 29.079 | 0.001206555 | 0.001102547 | 0.91  | 0.865 |
| 511 | 1267BK12#2412                | 206 | 29.188 | 0.007443491 | 0.005135343 | 0.69  | 0.020 |
| 512 | 1267BK12#2412                | 116 | 29.188 | 0.005371429 | 0.004490569 | 0.84  | 0.151 |
| 513 | 1267BK12#2436                | 174 | 29.406 | 0.026248302 | 0.036494335 | 1.39  | 0.356 |
| 514 | 1267BK12#2455                | 319 | 29.578 | 0.163341680 | 0.183357548 | 1.12  | 0.275 |
| 515 | 1267BK12#2463                | 373 | 29.652 | 0.000172313 | 0.000339220 | 1.97  | 0.324 |
| 516 | 1267BK12#2476#16:0           | 313 | 29.770 | 0.055545269 | 0.057454716 | 1.03  | 0.820 |
| 517 | 1267BK12#2483                | 360 | 29.833 | 0.000427618 | 0.000626865 | 1.47  | 0.022 |
| 518 | 1267BK12#2512                | 484 | 30.097 | 0.000057154 | 0.000114459 | 2.00  | 0.017 |
| 519 | 1267BK12#2527#dopamine       | 174 | 30.234 | 0.000443875 | 0.001429061 | 3.22  | 0.090 |
| 520 | 1267BK12#2527#dopamine       | 426 | 30.234 | 0.000027763 | 0.000039951 | 1.44  | 0.629 |
| 521 | 1267BK12#2537                | 288 | 30.326 | 0.000586775 | 0.000490347 | 0.84  | 0.477 |
| 522 | 1267BK12#2548#myo-ino        | 507 | 30.426 | 0.021396069 | 0.029912289 | 1.40  | 0.008 |
| 523 | 1267BK12#2548#myo-ino        | 305 | 30.426 | 0.687599456 | 0.965549349 | 1.40  | 0.002 |
| 524 | 1267BK12#2559                | 262 | 30.527 | 0.001030499 | 0.000602397 | 0.58  | 0.153 |
| 525 | 1267BK12#2559                | 205 | 30.527 | 0.078110895 | 0.051974148 | 0.67  | 0.472 |
| 526 | 1267BK12#2560#t-ferulic      | 338 | 30.536 | 0.000648971 | 0.000972664 | 1.50  | 0.228 |
| 527 | 1267BK12#2560#t-ferulic      | 249 | 30.536 | 0.000510919 | 0.000505966 | 0.99  | 0.969 |
| 528 | 1267BK12#2560#t-ferulic      | 323 | 30.536 | 0.000440950 | 0.000597456 | 1.35  | 0.163 |
| 529 | 1267BK12#2584                | 373 | 30.756 | 0.000509346 | 0.001793512 | 3.52  | 0.263 |
| 530 | 1267BK12#2589                | 319 | 30.784 | 0.029255627 | 0.030866467 | 1.06  | 0.682 |
| 531 | 1267BK12#2609                | 319 | 30.975 | 0.009082641 | 0.012631657 | 1.39  | 0.119 |
| 532 | 1267BK12#2620                | 352 | 31.102 | 0.000082259 | 0.000438051 | 5.33  | 0.298 |
| 533 | 1267BK12#2633#t-caffeic      | 396 | 31.194 | 0.000318820 | 0.000333270 | 1.05  | 0.825 |
| 534 | 1267BK12#2633#t-caffeic      | 219 | 31.194 | 0.000907492 | 0.001094354 | 1.21  | 0.263 |
| 535 | 1267BK12#2633#t-caffeic      | 381 | 31.194 | 0.000090482 | 0.000142942 | 1.58  | 0.158 |
| 536 | 1267BK12#2639                | 319 | 31.258 | 0.008631861 | 0.006471253 | 0.75  | 0.594 |
| 537 | 1267BK12#2660#noradrenalin 5 | 174 | 31.449 | 0.000961694 | 0.003946458 | 4.10  | 0.002 |
| 538 | 1267BK12#2685                | 364 | 31.686 | 0.000649167 | 0.000465942 | 0.72  | 0.002 |
| 539 | 1267BK12#2685                | 230 | 31.686 | 0.000919369 | 0.000820804 | 0.89  | 0.352 |
| 540 | 1267BK12#2715                | 249 | 31.950 | 0.006147176 | 0.044416893 | 7.23  | 0.001 |
| 541 | 1267BK12#2715                | 204 | 31.950 | 0.075417655 | 0.484476112 | 6.42  | 0.001 |
| 542 | 1267BK12#2723                | 218 | 32.024 | 0.003104077 | 0.020635498 | 6.65  | 0.000 |
| 543 | 1267BK12#2723                | 235 | 32.024 | 0.001274926 | 0.004022275 | 3.15  | 0.003 |
| 544 | 1267BK12#2734#docosane       | 85  | 32.126 | 3.007392243 | 2.789085955 | 0.93  | 0.431 |
| 545 | 1267BK12#2738                | 357 | 32.166 | 0.000125950 | 0.000560270 | 4.45  | 0.189 |
| 546 | 1267BK12#2738                | 445 | 32.166 | 0.000083976 | 0.000219468 | 2.61  | 0.171 |
| 547 | 1267BK12#2742#tryptophan 2   | 202 | 32.204 | 0.001709694 | 0.011918790 | 6.97  | 0.043 |
| 548 | 1267BK12#2742#tryptophan 2   | 391 | 32.204 | 0.000128436 | 0.000529815 | 4.13  | 0.027 |
| 549 | 1267BK12#2742#tryptophan 2   | 278 | 32.204 | 0.000246481 | 0.000832988 | 3.38  | 0.019 |
| 550 | 1267BK12#2758#tryptophan 3   | 202 | 32.350 | 0.006230571 | 0.103431649 | 16.60 | 0.039 |
| 551 | 1267BK12#2758#tryptophan 3   | 291 | 32.350 | 0.000869506 | 0.010600137 | 12.19 | 0.048 |
| 552 | 1267BK12#2758#tryptophan 3   | 200 | 32.350 | 0.000220292 | 0.002971100 | 13.49 | 0.032 |
| 553 | 1267BK12#2801#18:0           | 341 | 32.742 | 0.051430696 | 0.057119073 | 1.11  | 0.476 |
| 554 | 1267BK12#2809#t-sinapic      | 368 | 32.815 | 0.041530659 | 0.064086073 | 1.54  | 0.128 |
| 555 | 1267BK12#2809#t-sinapic      | 338 | 32.815 | 0.041804017 | 0.065989569 | 1.58  | 0.125 |



|     |                              |     |        |             |             |      |       |
|-----|------------------------------|-----|--------|-------------|-------------|------|-------|
| 556 | 1267BK12#2809##t-sinapic     | 353 | 32.815 | 0.021715078 | 0.033960258 | 1.56 | 0.135 |
| 557 | 1267BK12#2822                | 159 | 32.933 | 0.013795147 | 0.011557966 | 0.84 | 0.314 |
| 558 | 1267BK12#2822                | 286 | 32.933 | 0.001912988 | 0.001680834 | 0.88 | 0.528 |
| 559 | 1267BK12#2859                | 290 | 33.272 | 0.009520918 | 0.015769130 | 1.66 | 0.115 |
| 560 | 1267BK12#2859                | 319 | 33.272 | 0.004478595 | 0.007063248 | 1.58 | 0.138 |
| 561 | 1267BK12#2881                | 263 | 33.472 | 0.000362471 | 0.000371684 | 1.03 | 0.874 |
| 562 | 1267BK12#2881                | 259 | 33.472 | 0.000084188 | 0.000176543 | 2.10 | 0.118 |
| 563 | 1267BK12#2907                | 328 | 33.719 | 0.005549476 | 0.005472723 | 0.99 | 0.975 |
| 564 | 1267BK12#2908##fru-6-P MX    | 315 | 33.718 | 0.003863714 | 0.004660282 | 1.21 | 0.703 |
| 565 | 1267BK12#2908##fru-6-P MX    | 260 | 33.718 | 0.000352318 | 0.000466703 | 1.32 | 0.477 |
| 566 | 1267BK12#2921                | 173 | 33.820 | 0.000584262 | 0.001069643 | 1.83 | 0.025 |
| 567 | 1267BK12#2926##glc-6-P MX1   | 387 | 33.892 | 0.011519779 | 0.014700051 | 1.28 | 0.638 |
| 568 | 1267BK12#2944                | 277 | 34.057 | 0.000100991 | 0.000122207 | 1.21 | 0.585 |
| 569 | 1267BK12#2944                | 204 | 34.057 | 0.002335260 | 0.003102021 | 1.33 | 0.134 |
| 570 | 1267BK12#2953##glc-6-P MX2   | 387 | 34.131 | 0.002349542 | 0.002896190 | 1.23 | 0.678 |
| 571 | 1267BK12#2958                | 417 | 34.177 | 0.000522481 | 0.001053928 | 2.02 | 0.147 |
| 572 | 1267BK12#2958                | 489 | 34.177 | 0.000208993 | 0.000558197 | 2.67 | 0.037 |
| 573 | 1267BK12#2975                | 331 | 34.332 | 0.002452767 | 0.004541886 | 1.85 | 0.023 |
| 574 | 1267BK12#2975                | 204 | 34.332 | 0.002095896 | 0.011104261 | 5.30 | 0.029 |
| 575 | 1267BK12#2975                | 172 | 34.332 | 0.000997353 | 0.001018901 | 1.02 | 0.942 |
| 576 | 1267BK12#2980                | 331 | 34.379 | 0.003170117 | 0.004594780 | 1.45 | 0.090 |
| 577 | 1267BK12#2980                | 262 | 34.379 | 0.001994406 | 0.002242115 | 1.12 | 0.319 |
| 578 | 1267BK12#2980                | 421 | 34.379 | 0.001618662 | 0.001689186 | 1.04 | 0.761 |
| 579 | 1267BK12#3007                | 351 | 34.626 | 0.000159764 | 0.000862432 | 5.40 | 0.002 |
| 580 | 1267BK12#3007                | 204 | 34.626 | 0.028017173 | 0.035172756 | 1.26 | 0.250 |
| 581 | 1267BK12#3014                | 292 | 34.690 | 0.007600751 | 0.010623537 | 1.40 | 0.333 |
| 582 | 1267BK12#3014                | 204 | 34.690 | 0.025303970 | 0.052556429 | 2.08 | 0.002 |
| 583 | 1267BK12#3034                | 91  | 34.872 | 0.002003565 | 0.002193475 | 1.09 | 0.812 |
| 584 | 1267BK12#3034                | 204 | 34.872 | 0.011921669 | 0.017764065 | 1.49 | 0.645 |
| 585 | 1267BK12#3058                | 356 | 35.138 | 0.001461630 | 0.001372018 | 0.94 | 0.899 |
| 586 | 1267BK12#3058                | 262 | 35.138 | 0.001059762 | 0.000922184 | 0.87 | 0.745 |
| 587 | 1267BK12#3061##myo-ino-2-P 1 | 318 | 35.131 | 0.002352879 | 0.003330168 | 1.42 | 0.322 |
| 588 | 1267BK12#3081                | 159 | 35.302 | 0.000211337 | 0.000365758 | 1.73 | 0.100 |
| 589 | 1267BK12#3097                | 245 | 35.458 | 0.000607493 | 0.000726309 | 1.20 | 0.644 |
| 590 | 1267BK12#3097                | 360 | 35.458 | 0.000390829 | 0.000610968 | 1.56 | 0.192 |
| 591 | 1267BK12#3118                | 430 | 35.642 | 0.000659834 | 0.001121096 | 1.70 | 0.248 |
| 592 | 1267BK12#3118                | 360 | 35.642 | 0.000518449 | 0.001049882 | 2.03 | 0.163 |
| 593 | 1267BK12#3179                | 204 | 36.200 | 0.009212845 | 0.025786740 | 2.80 | 0.030 |
| 594 | 1267BK12#3179                | 247 | 36.200 | 0.000095386 | 0.000337038 | 3.53 | 0.018 |
| 595 | 1267BK12#3189                | 105 | 36.292 | 0.000643698 | 0.001135313 | 1.76 | 0.004 |
| 596 | 1267BK12#3189                | 356 | 36.292 | 0.001013467 | 0.001113641 | 1.10 | 0.814 |
| 597 | 1267BK12#3189                | 223 | 36.292 | 0.000259544 | 0.000380960 | 1.47 | 0.134 |
| 598 | 1267BK12#3203                | 321 | 36.419 | 0.012890121 | 0.024391613 | 1.89 | 0.018 |
| 599 | 1267BK12#3203                | 204 | 36.419 | 0.077775652 | 0.152331975 | 1.96 | 0.008 |
| 600 | 1267BK12#3203                | 361 | 36.419 | 0.004880723 | 0.009468757 | 1.94 | 0.005 |
| 601 | 1267BK12#3258                | 219 | 36.923 | 0.008338252 | 0.007847700 | 0.94 | 0.646 |
| 602 | 1267BK12#3278                | 290 | 37.107 | 0.000073101 | 0.000179050 | 2.45 | 0.127 |
| 603 | 1267BK12#3283                | 304 | 37.144 | 0.000057402 | 0.000097453 | 1.70 | 0.251 |
| 604 | 1267BK12#3283                | 175 | 37.144 | 0.000194833 | 0.000211520 | 1.09 | 0.761 |
| 605 | 1267BK12#3302                | 361 | 37.336 | 0.006505600 | 0.006356158 | 0.98 | 0.904 |
| 606 | 1267BK12#3302                | 267 | 37.336 | 0.000065438 | 0.000150632 | 2.30 | 0.096 |
| 607 | 1267BK12#3317                | 254 | 37.465 | 0.000102190 | 0.000123682 | 1.21 | 0.611 |
| 608 | 1267BK12#3323                | 535 | 37.520 | 0.000065294 | 0.000121493 | 1.86 | 0.103 |
| 609 | 1267BK12#3382##sucrose       | 437 | 38.090 | 0.412375164 | 0.370945517 | 0.90 | 0.641 |
| 610 | 1267BK12#3386##sucrose       | 451 | 38.099 | 0.165775244 | 0.144021970 | 0.87 | 0.544 |
| 611 | 1267BK12#3391                | 423 | 38.169 | 0.003536415 | 0.003777289 | 1.07 | 0.669 |
| 612 | 1267BK12#3431                | 204 | 38.510 | 0.005987149 | 0.014289359 | 2.39 | 0.015 |
| 613 | 1267BK12#3467                | 450 | 38.859 | 0.000082516 | 0.000155624 | 1.89 | 0.155 |
| 614 | 1267BK12#3487                | 204 | 39.034 | 0.011299336 | 0.012066705 | 1.07 | 0.513 |
| 615 | 1267BK12#3515##maltose MX1   | 204 | 39.300 | 0.019933848 | 0.013874373 | 0.70 | 0.237 |
| 616 | 1267BK12#3515##maltose MX1   | 160 | 39.300 | 0.002099131 | 0.001873947 | 0.89 | 0.696 |
| 617 | 1267BK12#3522##trehalose     | 191 | 39.356 | 0.008214617 | 0.005275477 | 0.64 | 0.014 |
| 618 | 1267BK12#3559                | 193 | 39.695 | 0.001221754 | 0.001517274 | 1.24 | 0.293 |

|     |                                |     |        |             |             |         |       |
|-----|--------------------------------|-----|--------|-------------|-------------|---------|-------|
| 619 | 1267BK12#3586                  | 105 | 39.944 | 0.105813392 | 0.099029082 | 0.94    | 0.416 |
| 620 | 1267BK12#3586                  | 179 | 39.944 | 0.154625292 | 0.134698135 | 0.87    | 0.300 |
| 621 | 1267BK12#3594#octacosane       | 85  | 40.018 | 2.663978829 | 2.445840887 | 0.92    | 0.364 |
| 622 | 1267BK12#3622                  | 277 | 40.279 | 0.000109378 | 0.000069739 | 0.64    | 0.327 |
| 623 | 1267BK12#3633                  | 450 | 40.380 | 0.000095210 | 0.000126425 | 1.33    | 0.479 |
| 624 | 1267BK12#3668                  | 345 | 40.730 | 0.000060512 | 0.000139212 | 2.30    | 0.103 |
| 625 | 1267BK12#3668                  | 175 | 40.730 | 0.000088620 | 0.000178656 | 2.02    | 0.008 |
| 626 | 1267BK12#3674                  | 312 | 40.766 | 0.000030299 | 0.000083708 | 2.76    | 0.004 |
| 627 | 1267BK12#3674                  | 219 | 40.766 | 0.000529648 | 0.000728425 | 1.38    | 0.247 |
| 628 | 1267BK12#3721                  | 280 | 41.199 | 0.000063634 | 0.000088429 | 1.39    | 0.519 |
| 629 | 1267BK12#3768                  | 191 | 41.631 | 0.001637100 | 0.000521658 | 0.32    | 0.002 |
| 630 | 1267BK12#3768                  | 204 | 41.631 | 0.001869732 | 0.000895448 | 0.48    | 0.023 |
| 631 | 1267BK12#3775                  | 289 | 41.688 | 0.000157615 | 0.000126178 | 0.80    | 0.630 |
| 632 | 1267BK12#3802                  | 345 | 41.945 | 0.000101903 | 0.000138415 | 1.36    | 0.224 |
| 633 | 1267BK12#3802                  | 249 | 41.945 | 0.000117198 | 0.000103780 | 0.89    | 0.664 |
| 634 | 1267BK12#3821                  | 249 | 42.130 | 0.000112661 | 0.000084760 | 0.75    | 0.242 |
| 635 | 1267BK12#3827                  | 204 | 42.167 | 0.004199844 | 0.053825408 | 12.82   | 0.000 |
| 636 | 1267BK12#3827                  | 191 | 42.167 | 0.001174274 | 0.013782674 | 11.74   | 0.000 |
| 637 | 1267BK12#3827                  | 433 | 42.167 | 0.000215917 | 0.002399140 | 11.11   | 0.001 |
| 638 | 1267BK12#3841#3-c-caffeoquinic | 345 | 42.296 | 0.000092446 | 0.000407143 | 4.40    | 0.000 |
| 639 | 1267BK12#3841#3-c-caffeoquinic | 255 | 42.296 | 0.000087864 | 0.000137486 | 1.56    | 0.211 |
| 640 | 1267BK12#3856                  | 204 | 42.434 | 0.214145506 | 0.227806868 | 1.06    | 0.619 |
| 641 | 1267BK12#3856                  | 433 | 42.434 | 0.005657126 | 0.006101961 | 1.08    | 0.562 |
| 642 | 1267BK12#3856                  | 191 | 42.434 | 0.039276585 | 0.041658045 | 1.06    | 0.634 |
| 643 | 1267BK12#3858#5-c-caffeoquinic | 345 | 42.462 | 0.001044927 | 0.001121755 | 1.07    | 0.461 |
| 644 | 1267BK12#3858#5-c-caffeoquinic | 447 | 42.453 | 0.000021822 | 0.000042236 | 1.94    | 0.327 |
| 645 | 1267BK12#3865#4-c-caffeoquinic | 307 | 42.517 | 0.001125220 | 0.001230789 | 1.09    | 0.286 |
| 646 | 1267BK12#3865#4-c-caffeoquinic | 489 | 42.517 | 0.000024681 | 0.000095416 | 3.87    | 0.346 |
| 647 | 1267BK12#3930                  | 396 | 43.127 | 0.000026467 | 0.000050106 | 1.89    | 0.178 |
| 648 | 1267BK12#3930                  | 219 | 43.127 | 0.001037305 | 0.002090067 | 2.01    | 0.031 |
| 649 | 1267BK12#3954                  | 396 | 43.339 | 0.000037693 | 0.000051578 | 1.37    | 0.569 |
| 650 | 1267BK12#3954                  | 219 | 43.339 | 0.001495003 | 0.000352036 | 0.24    | 0.008 |
| 651 | 1267BK12#3963                  | 345 | 43.431 | 0.000133911 | 0.000074635 | 0.56    | 0.337 |
| 652 | 1267BK12#3963                  | 396 | 43.431 | 0.000028275 | 0.000039209 | 1.39    | 0.639 |
| 653 | 1267BK12#3987#3-t-caffeoquinic | 345 | 43.644 | 0.000067951 | 0.000072495 | 1.07    | 0.815 |
| 654 | 1267BK12#3987#3-t-caffeoquinic | 255 | 43.644 | 0.000061748 | 0.000149499 | 2.42    | 0.248 |
| 655 | 1267BK12#3996                  | 204 | 43.730 | 0.033506653 | 0.198662566 | 5.93    | 0.225 |
| 656 | 1267BK12#3996                  | 363 | 43.730 | 0.003295647 | 0.002768283 | 0.84    | 0.735 |
| 657 | 1267BK12#4004                  | 597 | 43.806 | 0.001254154 | 0.010174563 | 8.11    | 0.228 |
| 658 | 1267BK12#4045                  | 249 | 44.176 | 0.000226017 | 0.000201270 | 0.89    | 0.702 |
| 659 | 1267BK12#4045                  | 255 | 44.176 | 0.000142946 | 0.000095944 | 0.67    | 0.367 |
| 660 | 1267BK12#4062#4-t-caffeoquinic | 307 | 44.343 | 0.000081705 | 0.000095391 | 1.17    | 0.555 |
| 661 | 1267BK12#4062#4-t-caffeoquinic | 489 | 44.343 | 0.000033650 | 0.000047549 | 1.41    | 0.045 |
| 662 | 1267BK12#4075#dotriacontane    | 85  | 44.468 | 2.536579427 | 2.318388782 | 0.91    | 0.333 |
| 663 | 1267BK12#4085#5-t-caffeoquinic | 307 | 44.565 | 0.000093254 | 0.000073735 | 0.79    | 0.478 |
| 664 | 1267BK12#4085#5-t-caffeoquinic | 447 | 44.565 | 0.000023114 | 0.000041228 | 1.78    | 0.285 |
| 665 | 1267BK12#4096                  | 204 | 44.658 | 0.000898563 | 0.000775069 | 0.86    | 0.776 |
| 666 | 1267BK12#4096                  | 345 | 44.658 | 0.000064486 | 0.000072585 | 1.13    | 0.534 |
| 667 | 1267BK12#4175                  | 279 | 45.399 | 0.000410620 | 0.000319980 | 0.78    | 0.499 |
| 668 | 1267BK12#4175                  | 255 | 45.399 | 0.000077916 | 0.000091581 | 1.18    | 0.597 |
| 669 | 1267BK12#4278                  | 361 | 46.352 | 0.000055761 | 0.067810798 | 1216.10 | 0.039 |
| 670 | 1267BK12#4278                  | 450 | 46.352 | 0.000099440 | 0.000399582 | 4.02    | 0.062 |
| 671 | 1267BK12#4278                  | 319 | 46.352 | 0.000067386 | 0.003797904 | 56.36   | 0.067 |
| 672 | 1267BK12#4302                  | 441 | 46.585 | 0.011938446 | 0.024145215 | 2.02    | 0.036 |
| 673 | 1267BK12#4500#hexatriacontane  | 85  | 48.418 | 2.253663135 | 2.019277603 | 0.90    | 0.297 |
| 674 | 1267BK14#3416                  | 204 | 38.418 | 0.010473591 | 0.010510450 | 1.00    | 0.984 |
| 675 | 1267BK14#3416                  | 217 | 38.418 | 0.004546111 | 0.004466381 | 0.98    | 0.839 |
| 676 | 1267BK14#3416                  | 451 | 38.418 | 0.000161087 | 0.000137816 | 0.86    | 0.633 |
| 677 | 1267BK14#3416                  | 361 | 38.418 | 0.002535984 | 0.001971635 | 0.78    | 0.251 |
| 678 | 1267BK38#3430                  | 204 | 38.538 | 0.005987149 | 0.014289359 | 2.39    | 0.015 |
| 679 | 1267BK38#3430                  | 361 | 38.538 | 0.000715191 | 0.001316730 | 1.84    | 0.033 |
| 680 | 1267BK38#3430                  | 423 | 38.538 | 0.000317347 | 0.000515367 | 1.62    | 0.040 |
| 681 | 1267BK38#3466                  | 361 | 38.873 | 0.010850816 | 0.011908194 | 1.10    | 0.676 |

|     |                                |         |        |             |             |      |       |
|-----|--------------------------------|---------|--------|-------------|-------------|------|-------|
| 682 | 1267BK38#3466                  | 423     | 38.873 | 0.000027654 | 0.000066581 | 2.41 | 0.260 |
| 683 | 1267BK38#3466                  | 217     | 38.873 | 0.021370673 | 0.024016866 | 1.12 | 0.328 |
| 684 | 1267BK38#4348                  | 259     | 47.146 | 0.000068991 | 0.000060378 | 0.88 | 0.565 |
| 685 | 1267BK38#4348                  | 217     | 47.146 | 0.000239140 | 0.000192672 | 0.81 | 0.235 |
| 686 | 1267BK38#4348                  | 349     | 47.146 | 0.000036165 | 0.000043157 | 1.19 | 0.718 |
| 687 | 1267BK38#4360                  | 361     | 47.254 | 0.000055754 | 0.000064478 | 1.16 | 0.630 |
| 688 | 1267BK38#4360                  | 204     | 47.254 | 0.000197420 | 0.000133737 | 0.68 | 0.193 |
| 689 | 1267BK38#4360                  | 271     | 47.254 | 0.000079482 | 0.000097830 | 1.23 | 0.619 |
| 690 | 1283BV06#2056#glyceric-3-P     | 357     | 25.932 | 0.001588390 | 0.001045512 | 0.66 | 0.098 |
| 691 | 1286BU03#0764#norvaline 2      | 144     | 14.409 | 0.000673964 | 0.000560623 | 0.83 | 0.780 |
| 692 | 1286BU03#0764#norvaline 2      | 218     | 14.409 | 0.003703262 | 0.019008182 | 5.13 | 0.462 |
| 693 | 1286BU04#2069#isocitric        | 245     | 26.178 | 0.002765547 | 0.003473185 | 1.26 | 0.341 |
| 694 | 1286BU04#2069#isocitric        | 375     | 26.178 | 0.058736565 | 0.073399317 | 1.25 | 0.491 |
| 695 | 1286BU07#2401#saccharic        | 292     | 29.206 | 0.002861644 | 0.021954225 | 7.67 | 0.318 |
| 696 | 1286BU08#2094                  | 160     | 26.428 | 0.010063942 | 0.008676781 | 0.86 | 0.152 |
| 697 | 1286BU08#2094                  | 334     | 26.428 | 0.000227647 | 0.000299691 | 1.32 | 0.388 |
| 698 | 1286BU08#2094                  | 189     | 26.428 | 0.003095944 | 0.002597894 | 0.84 | 0.598 |
| 699 | 1286BU08#2283#galacturonic MX1 | 160     | 28.162 | 0.002948221 | 0.026696218 | 9.06 | 0.371 |
| 700 | 1286BU08#2314#galacturonic MX2 | 160     | 28.449 | 0.001765198 | 0.002483189 | 1.41 | 0.569 |
| 701 | 1286BU10#2380#gluconic         | 333     | 29.046 | 0.014004532 | 0.030409099 | 2.17 | 0.419 |
| 702 | 1286BU10#2380#gluconic         | 292     | 29.046 | 0.026386500 | 0.042688456 | 1.62 | 0.251 |
| 703 | 1286BU10#2380#gluconic         | 423     | 29.046 | 0.001410423 | 0.003562837 | 2.53 | 0.480 |
| 704 | 1286BU10#2380#gluconic         | 433     | 29.046 | 0.002546572 | 0.004758049 | 1.87 | 0.198 |
| 705 | 1286BU13#1452#g-aminobutyric 3 | 174     | 20.640 | 0.363486949 | 0.849984040 | 2.34 | 0.000 |
| 706 | 1286BU13#1452#g-aminobutyric 3 | 304     | 20.640 | 0.069650179 | 0.164855569 | 2.37 | 0.000 |
| 707 | 1310BK02#3728#d-tocopherol     | 474+475 | 41.175 | 0.000069785 | 0.000074327 | 1.07 | 0.916 |
| 708 | 1310BK02#3728#d-tocopherol     | 208     | 41.175 | 0.000175211 | 0.000246024 | 1.40 | 0.274 |
| 709 | 1310BK02#3834#b-tocopherol     | 488+489 | 42.144 | 0.000056905 | 0.000087252 | 1.53 | 0.611 |
| 710 | 1310BK02#3834#b-tocopherol     | 223     | 42.144 | 0.000132137 | 0.000100527 | 0.76 | 0.312 |
| 711 | 1310BK02#3848#g-tocopherol     | 488+489 | 42.273 | 0.000052569 | 0.000053640 | 1.02 | 0.962 |
| 712 | 1310BK02#3848#g-tocopherol     | 223     | 42.273 | 0.000120184 | 0.000127288 | 1.06 | 0.909 |
| 713 | 1310BK02#4014#a-tocopherol     | 502+503 | 43.815 | 0.000059577 | 0.000125386 | 2.10 | 0.508 |
| 714 | 1310BK02#4014#a-tocopherol     | 237     | 43.815 | 0.000052748 | 0.000128933 | 2.44 | 0.206 |
| 715 | 1310BK02#4065#a-tocopherolacet | 430     | 44.291 | 0.000065590 | 0.000064575 | 0.98 | 0.970 |
| 716 | 1310BK02#4065#a-tocopherolacet | 165     | 44.291 | 0.000153141 | 0.000166862 | 1.09 | 0.797 |
| 717 | 1323AU19#2803#myo-ino-1-P 1    | 299     | 35.149 | 0.001325619 | 0.001943149 | 1.47 | 0.257 |
| 718 | 1323AU19#2803#myo-ino-1-P 1    | 318     | 35.149 | 0.002352879 | 0.003330168 | 1.42 | 0.322 |
| 719 | 1323AU19#2803#myo-ino-1-P 1    | 387     | 35.149 | 0.000784256 | 0.001033455 | 1.32 | 0.347 |
| 720 | 1323AU19#2897#myo-ino-1-P 2    | 318     | 35.928 | 0.000079990 | 0.000143340 | 1.79 | 0.095 |
| 721 | 1323AU19#2897#myo-ino-1-P 2    | 387     | 35.928 | 0.000060497 | 0.000161655 | 2.67 | 0.271 |
| 722 | 1323AU19#2897#myo-ino-1-P 2    | 494     | 35.928 | 0.000023571 | 0.000044201 | 1.88 | 0.368 |
| 723 | 1323AU30#3400#isomaltose       | 361     | 40.963 | 0.001388610 | 0.004594730 | 3.31 | 0.129 |
| 724 | 1323AU30#3400#isomaltose       | 160     | 40.963 | 0.000615517 | 0.001537925 | 2.50 | 0.101 |
| 725 | 1323AU30#3400#isomaltose       | 480     | 40.963 | 0.000069024 | 0.000226014 | 3.27 | 0.106 |
| 726 | 1323AU39#2079#ononitol         | 265     | 28.275 | 0.000593390 | 0.000711186 | 1.20 | 0.094 |
| 727 | 1323AU39#2079#ononitol         | 318     | 28.275 | 0.001757932 | 0.001864153 | 1.06 | 0.761 |
| 728 | 1323AU39#2079#ononitol         | 507     | 28.275 | 0.000128916 | 0.000157896 | 1.22 | 0.420 |
| 729 | 1324BK14#2728#glc-6-P MX1      | 160     | 33.886 | 0.006048712 | 0.007203768 | 1.19 | 0.722 |
| 730 | 1324BK14#2752#glc-6-P MX2      | 299     | 34.122 | 0.002810696 | 0.003388484 | 1.21 | 0.740 |
| 731 | 1324BK14#2752#glc-6-P MX2      | 471     | 34.122 | 0.000241987 | 0.000367318 | 1.52 | 0.211 |
| 732 | 1324BK16#2662#fru-6-P MX       | 459     | 33.716 | 0.000326834 | 0.000516800 | 1.58 | 0.356 |
| 733 | 1324BK20#2928#gluconic-6-P     | 299     | 35.281 | 0.000074782 | 0.000055004 | 0.74 | 0.316 |
| 734 | 1324BK20#2928#gluconic-6-P     | 387     | 35.281 | 0.000412217 | 0.000069217 | 0.17 | 0.109 |
| 735 | 1324BK22#2721#man-6-P MX1      | 387     | 33.720 | 0.002437315 | 0.002638039 | 1.08 | 0.858 |
| 736 | 1324BK22#2721#man-6-P MX1      | 160     | 33.720 | 0.002178325 | 0.002152622 | 0.99 | 0.977 |
| 737 | 1324BK22#2739#man-6-P MX2      | 387     | 33.893 | 0.011519779 | 0.014700051 | 1.28 | 0.638 |
| 738 | 1324BK23#1767#glyceral-3-P MX1 | 384     | 24.156 | 0.000039857 | 0.000024404 | 0.61 | 0.051 |
| 739 | 1324BK23#1767#glyceral-3-P MX1 | 299     | 24.156 | 0.000114471 | 0.000353545 | 3.09 | 0.012 |
| 740 | 1324BK23#1792#glyceral-3-P MX2 | 328     | 24.394 | 0.000139233 | 0.000457887 | 3.29 | 0.123 |
| 741 | 1324BK23#1792#glyceral-3-P MX2 | 299     | 24.395 | 0.000155311 | 0.000193555 | 1.25 | 0.704 |
| 742 | 1324BK24#1877#glycerol-1-P     | 357     | 25.120 | 0.001658392 | 0.006320778 | 3.81 | 0.039 |
| 743 | 1324BK24#1877#glycerol-1-P     | 299     | 25.120 | 0.002198440 | 0.007656772 | 3.48 | 0.055 |
| 744 | 1324BK31#2823#myo-ino-2-P 1    | 387     | 35.131 | 0.000788849 | 0.001048557 | 1.33 | 0.347 |

|     |                                |     |        |             |             |      |       |
|-----|--------------------------------|-----|--------|-------------|-------------|------|-------|
| 745 | 1324BK31#2898#myo-ino-2-P 2    | 387 | 35.873 | 0.000049787 | 0.000118429 | 2.38 | 0.045 |
| 746 | 1324BK31#2898#myo-ino-2-P 2    | 318 | 35.873 | 0.000058567 | 0.000158435 | 2.71 | 0.003 |
| 747 | 1325BK16#0403#d4-alanine 2     | 120 | 11.028 | 0.010784419 | 0.011141080 | 1.03 | 0.951 |
| 748 | 1325BK16#0914#g-aminobutyric 2 | 102 | 15.830 | 0.021054177 | 0.024262231 | 1.15 | 0.866 |
| 749 | 1325BK16#0914#g-aminobutyric 2 | 232 | 15.830 | 0.002992716 | 0.002343231 | 0.78 | 0.636 |
| 750 | 1325BK16#1034                  | 266 | 16.936 | 0.361557698 | 0.426607879 | 1.18 | 0.653 |
| 751 | 1325BK16#1034                  | 192 | 16.936 | 2.124329774 | 2.455431088 | 1.16 | 0.594 |
| 752 | 1325BK16#1302                  | 338 | 19.407 | 0.020131921 | 0.028971223 | 1.44 | 0.235 |
| 753 | 1325BK16#1302                  | 236 | 19.407 | 0.201825381 | 0.284832137 | 1.41 | 0.285 |
| 754 | 1325BK16#1308                  | 232 | 19.462 | 0.011705889 | 0.023620908 | 2.02 | 0.037 |
| 755 | 1325BK16#1403                  | 283 | 20.347 | 0.004555395 | 0.004153824 | 0.91 | 0.443 |
| 756 | 1325BK16#1537                  | 247 | 21.624 | 0.002499135 | 0.006724143 | 2.69 | 0.013 |
| 757 | 1325BK16#1537                  | 349 | 21.624 | 0.000534463 | 0.001278775 | 2.39 | 0.024 |
| 758 | 1325BK16#1546                  | 306 | 21.692 | 0.008027810 | 0.009885129 | 1.23 | 0.258 |
| 759 | 1325BK16#1552                  | 142 | 21.757 | 0.016411742 | 0.036245155 | 2.21 | 0.026 |
| 760 | 1325BK16#1552                  | 186 | 21.757 | 0.015444502 | 0.034939918 | 2.26 | 0.016 |
| 761 | 1325BK16#1589                  | 273 | 22.099 | 0.012670422 | 0.027113009 | 2.14 | 0.010 |
| 762 | 1325BK16#1610                  | 160 | 22.293 | 0.001577942 | 0.001603722 | 1.02 | 0.955 |
| 763 | 1325BK16#1749                  | 159 | 23.595 | 0.001085089 | 0.002312889 | 2.13 | 0.142 |
| 764 | 1325BK16#1900                  | 273 | 25.004 | 0.051745573 | 0.045867185 | 0.89 | 0.180 |
| 765 | 1325BK16#1946                  | 174 | 25.435 | 0.002818821 | 0.003642318 | 1.29 | 0.491 |
| 766 | 1325BK16#1946                  | 299 | 25.435 | 0.004334131 | 0.005939846 | 1.37 | 0.418 |
| 767 | 1325BK16#2257                  | 203 | 28.362 | 0.003475563 | 0.007823922 | 2.25 | 0.095 |
| 768 | 1325BK16#2261                  | 299 | 28.410 | 0.023264760 | 0.015171192 | 0.65 | 0.060 |
| 769 | 1325BK16#2261                  | 204 | 28.410 | 0.005680779 | 0.014342394 | 2.52 | 0.074 |
| 770 | 1325BK16#2280                  | 284 | 28.593 | 0.000145260 | 0.000129566 | 0.89 | 0.681 |
| 771 | 1325BK16#2280                  | 244 | 28.593 | 0.001163042 | 0.000331423 | 0.28 | 0.119 |
| 772 | 1325BK16#2372                  | 185 | 29.448 | 0.000329157 | 0.000250622 | 0.76 | 0.538 |
| 773 | 1325BK16#2500#uric 4           | 456 | 30.735 | 0.000519840 | 0.003020510 | 5.81 | 0.037 |
| 774 | 1325BK16#2500#uric 4           | 441 | 30.735 | 0.000761553 | 0.003684011 | 4.84 | 0.054 |
| 775 | 1325BK16#2538                  | 319 | 31.100 | 0.009093060 | 0.012631657 | 1.39 | 0.120 |
| 776 | 1325BK16#2547                  | 319 | 31.189 | 0.010920200 | 0.015442837 | 1.41 | 0.119 |
| 777 | 1325BK16#2620                  | 199 | 31.914 | 0.000194590 | 0.000300590 | 1.54 | 0.428 |
| 778 | 1325BK16#2633                  | 263 | 32.041 | 0.001523051 | 0.005486328 | 3.60 | 0.050 |
| 779 | 1325BK16#2721                  | 179 | 32.913 | 0.000938357 | 0.001172821 | 1.25 | 0.092 |
| 780 | 1325BK16#2781                  | 250 | 33.500 | 0.000278355 | 0.000385800 | 1.39 | 0.522 |
| 781 | 1325BK16#2785                  | 246 | 33.539 | 0.000162539 | 0.000194907 | 1.20 | 0.641 |
| 782 | 1325BK16#2906                  | 387 | 34.720 | 0.000076677 | 0.000100776 | 1.31 | 0.449 |
| 783 | 1325BK16#2906                  | 299 | 34.720 | 0.000165189 | 0.000154134 | 0.93 | 0.892 |
| 784 | 1325BK16#2954                  | 390 | 35.184 | 0.000120466 | 0.000133687 | 1.11 | 0.775 |
| 785 | 1325BK16#2978                  | 348 | 35.419 | 0.000038776 | 0.000112795 | 2.91 | 0.091 |
| 786 | 1325BK16#3052                  | 374 | 36.146 | 0.000038941 | 0.000056862 | 1.46 | 0.133 |
| 787 | 1325BK16#3060                  | 374 | 36.226 | 0.000047117 | 0.000315886 | 6.70 | 0.065 |
| 788 | 1325BK16#3075                  | 374 | 36.376 | 0.000046129 | 0.000109080 | 2.36 | 0.285 |
| 789 | 1325BK16#3075                  | 260 | 36.376 | 0.000096709 | 0.000187414 | 1.94 | 0.222 |
| 790 | 1325BK16#3089                  | 204 | 36.514 | 0.055518955 | 0.152272348 | 2.74 | 0.002 |
| 791 | 1325BK16#3089                  | 421 | 36.514 | 0.000024677 | 0.000060044 | 2.43 | 0.107 |
| 792 | 1325BK16#3138                  | 462 | 37.006 | 0.000020213 | 0.000043061 | 2.13 | 0.368 |
| 793 | 1325BK16#3138                  | 204 | 37.006 | 0.009953819 | 0.010539066 | 1.06 | 0.687 |
| 794 | 1325BK16#3148                  | 473 | 37.105 | 0.000030701 | 0.000039402 | 1.28 | 0.649 |
| 795 | 1325BK16#3171                  | 271 | 37.336 | 0.001435729 | 0.001435813 | 1.00 | 1.000 |
| 796 | 1325BK16#3184                  | 186 | 37.464 | 0.000153720 | 0.000153690 | 1.00 | 0.999 |
| 797 | 1325BK16#3191                  | 204 | 37.533 | 0.000598222 | 0.000778296 | 1.30 | 0.485 |
| 798 | 1325BK16#3191                  | 117 | 37.533 | 0.000995309 | 0.001929680 | 1.94 | 0.035 |
| 799 | 1325BK16#3281                  | 423 | 38.416 | 0.000166365 | 0.000203324 | 1.22 | 0.372 |
| 800 | 1325BK16#3284                  | 349 | 38.446 | 0.000044707 | 0.000117958 | 2.64 | 0.022 |
| 801 | 1325BK16#3284                  | 259 | 38.446 | 0.000204336 | 0.000235639 | 1.15 | 0.693 |
| 802 | 1325BK16#3293                  | 156 | 38.535 | 0.000172069 | 0.000207067 | 1.20 | 0.660 |
| 803 | 1325BK16#3293                  | 317 | 38.535 | 0.000074026 | 0.000200231 | 2.70 | 0.000 |
| 804 | 1325BK16#3299                  | 450 | 38.593 | 0.000306039 | 0.000403760 | 1.32 | 0.025 |
| 805 | 1325BK16#3299                  | 284 | 38.593 | 0.000825680 | 0.001198064 | 1.45 | 0.150 |
| 806 | 1325BK16#3311                  | 175 | 38.712 | 0.000083388 | 0.000203836 | 2.44 | 0.000 |
| 807 | 1325BK16#3387                  | 466 | 39.459 | 0.000168118 | 0.000219182 | 1.30 | 0.300 |

|     |                                |     |        |             |             |       |       |
|-----|--------------------------------|-----|--------|-------------|-------------|-------|-------|
| 808 | 1325BK16#3387                  | 262 | 39.459 | 0.000843825 | 0.000840135 | 1.00  | 0.965 |
| 809 | 1325BK16#3392                  | 433 | 39.508 | 0.000373418 | 0.000434608 | 1.16  | 0.716 |
| 810 | 1325BK16#3414                  | 160 | 39.724 | 0.001489660 | 0.001977417 | 1.33  | 0.236 |
| 811 | 1325BK16#3426                  | 348 | 39.842 | 0.000168046 | 0.000619708 | 3.69  | 0.115 |
| 812 | 1325BK16#3481                  | 355 | 40.380 | 0.000067404 | 0.000113366 | 1.68  | 0.255 |
| 813 | 1325BK16#3496                  | 189 | 40.533 | 0.000770684 | 0.000869475 | 1.13  | 0.691 |
| 814 | 1325BK16#3496                  | 204 | 40.533 | 0.012463131 | 0.012673585 | 1.02  | 0.958 |
| 815 | 1325BK16#3521                  | 312 | 40.778 | 0.000032542 | 0.000061900 | 1.90  | 0.127 |
| 816 | 1325BK16#3530                  | 525 | 40.866 | 0.000024902 | 0.000049271 | 1.98  | 0.171 |
| 817 | 1325BK16#3530                  | 204 | 40.866 | 0.004483764 | 0.010750498 | 2.40  | 0.142 |
| 818 | 1325BK16#3530                  | 345 | 40.866 | 0.000136012 | 0.000160727 | 1.18  | 0.592 |
| 819 | 1325BK16#3549                  | 251 | 41.051 | 0.000084845 | 0.000170228 | 2.01  | 0.464 |
| 820 | 1325BK16#3549                  | 292 | 41.051 | 0.000036195 | 0.000100600 | 2.78  | 0.017 |
| 821 | 1325BK16#3566                  | 332 | 41.216 | 0.000427413 | 0.000784492 | 1.84  | 0.092 |
| 822 | 1325BK16#3566                  | 361 | 41.216 | 0.000772439 | 0.001374383 | 1.78  | 0.226 |
| 823 | 1325BK16#3571                  | 358 | 41.255 | 0.000046435 | 0.000034580 | 0.74  | 0.286 |
| 824 | 1325BK16#3607                  | 251 | 41.615 | 0.000120695 | 0.000185907 | 1.54  | 0.093 |
| 825 | 1325BK16#3607                  | 292 | 41.615 | 0.000058058 | 0.000070123 | 1.21  | 0.525 |
| 826 | 1325BK16#3614                  | 318 | 41.684 | 0.000151246 | 0.000101390 | 0.67  | 0.457 |
| 827 | 1325BK16#3622                  | 204 | 41.762 | 0.002023997 | 0.004416546 | 2.18  | 0.039 |
| 828 | 1325BK16#3663                  | 318 | 42.161 | 0.000096516 | 0.001332298 | 13.80 | 0.000 |
| 829 | 1325BK16#3692                  | 318 | 42.441 | 0.005418662 | 0.005622515 | 1.04  | 0.713 |
| 830 | 1325BK16#3703                  | 204 | 42.548 | 0.214088452 | 0.227806868 | 1.06  | 0.618 |
| 831 | 1325BK16#3703                  | 259 | 42.548 | 0.000350447 | 0.000424277 | 1.21  | 0.440 |
| 832 | 1325BK16#3802                  | 375 | 43.487 | 0.000045662 | 0.000097696 | 2.14  | 0.063 |
| 833 | 1325BK16#3802                  | 318 | 43.487 | 0.000067469 | 0.000153866 | 2.28  | 0.041 |
| 834 | 1325BK16#3825                  | 91  | 43.721 | 0.000844579 | 0.000494315 | 0.59  | 0.162 |
| 835 | 1325BK16#3825                  | 204 | 43.721 | 0.033466542 | 0.198777249 | 5.94  | 0.224 |
| 836 | 1325BK16#3923                  | 91  | 44.673 | 0.000346265 | 0.000418267 | 1.21  | 0.484 |
| 837 | 1325BK16#3923                  | 204 | 44.673 | 0.000965817 | 0.000775069 | 0.80  | 0.660 |
| 838 | 1325BK16#3944                  | 349 | 44.873 | 0.000051240 | 0.000043373 | 0.85  | 0.702 |
| 839 | 1325BK16#3976                  | 119 | 45.182 | 0.000311606 | 0.000302340 | 0.97  | 0.929 |
| 840 | 1325BK16#3976                  | 259 | 45.182 | 0.000401816 | 0.000084924 | 0.21  | 0.084 |
| 841 | 1325BK16#4011                  | 91  | 45.511 | 0.000232812 | 0.000214383 | 0.92  | 0.738 |
| 842 | 1325BK16#4011                  | 204 | 45.511 | 0.000761471 | 0.000573329 | 0.75  | 0.331 |
| 843 | 1325BK16#4041                  | 349 | 45.796 | 0.000022654 | 0.000036772 | 1.62  | 0.421 |
| 844 | 1325BK16#4304                  | 441 | 48.284 | 0.001287012 | 0.000216131 | 0.17  | 0.091 |
| 845 | 1331BK22#2910                  | 202 | 34.720 | 0.003287183 | 0.000329395 | 0.10  | 0.012 |
| 846 | 1331BK22#2910                  | 361 | 34.720 | 0.012417697 | 0.005213055 | 0.42  | 0.040 |
| 847 | 1333BN04#2233#galacturonic MX1 | 333 | 28.162 | 0.002009876 | 0.002471730 | 1.23  | 0.123 |
| 848 | 1333BN06#2264#galacturonic MX1 | 364 | 28.162 | 0.000370910 | 0.000660779 | 1.78  | 0.375 |
| 849 | 1333BN06#2295#galacturonic MX2 | 333 | 28.450 | 0.003484414 | 0.004266664 | 1.22  | 0.265 |
| 850 | 1333BN06#2376#saccharic        | 373 | 29.206 | 0.000179418 | 0.000269590 | 1.50  | 0.092 |
| 851 | 1333BN07#2253                  | 243 | 28.406 | 0.003604851 | 0.004435934 | 1.23  | 0.625 |
| 852 | 1333BN09#2268                  | 333 | 28.910 | 0.009369537 | 0.012142868 | 1.30  | 0.097 |
| 853 | 1333BN09#2268                  | 292 | 28.910 | 0.026017536 | 0.035546686 | 1.37  | 0.063 |
| 854 | 1334BV09#1143#O-acet-serine    | 174 | 17.897 | 0.005279857 | 0.062919429 | 11.92 | 0.007 |
| 855 | 1334BV11#1880#putrescine 4     | 361 | 24.487 | 0.013038845 | 0.115592418 | 8.87  | 0.001 |
| 856 | 1334BV11#1880#putrescine 4     | 214 | 24.487 | 0.068113521 | 0.638593580 | 9.38  | 0.000 |
| 857 | 1334BV11#1885                  | 256 | 24.533 | 0.012872093 | 0.145461074 | 11.30 | 0.000 |
| 858 | 1334BV12#1883                  | 174 | 24.533 | 0.088332743 | 2.662496435 | 30.14 | 0.079 |
| 859 | 1334BV12#1883                  | 213 | 24.533 | 0.023560809 | 0.253811506 | 10.77 | 0.000 |
| 860 | 1334BV12#1883                  | 314 | 24.533 | 0.021901775 | 0.248148676 | 11.33 | 0.000 |
| 861 | 1334BV17#1407#N-acet-serine    | 132 | 20.301 | 0.006121270 | 0.016116793 | 2.63  | 0.002 |
| 862 | 1334BV17#1407#N-acet-serine    | 186 | 20.301 | 0.001844328 | 0.030411300 | 16.49 | 0.001 |
| 863 | 1334BV17#1407#N-acet-serine    | 261 | 20.301 | 0.001312471 | 0.018010424 | 13.72 | 0.000 |
| 864 | 1334BV19#3944                  | 204 | 43.806 | 0.033640946 | 0.199089354 | 5.92  | 0.224 |
| 865 | 1334BV19#3944                  | 337 | 43.806 | 0.001527569 | 0.010961995 | 7.18  | 0.223 |
| 866 | 1334BV20#2975                  | 451 | 34.690 | 0.001833404 | 0.002462518 | 1.34  | 0.372 |
| 867 | 1334BV20#2975                  | 375 | 34.690 | 0.004124539 | 0.005793893 | 1.40  | 0.334 |
| 868 | 1334BV20#3961                  | 202 | 43.806 | 0.027574986 | 0.002390987 | 0.09  | 0.011 |
| 869 | 1334BV20#3961                  | 227 | 43.806 | 0.016714158 | 0.002200594 | 0.13  | 0.012 |
| 870 | 1334BV21#1152#O-acet-serine    | 116 | 17.897 | 0.002780312 | 0.023704269 | 8.53  | 0.004 |



|     |                             |     |        |             |             |       |       |
|-----|-----------------------------|-----|--------|-------------|-------------|-------|-------|
| 871 | 1334BV21#1152#O-acet-serine | 132 | 17.897 | 0.002285275 | 0.026919323 | 11.78 | 0.009 |
| 872 | 1334BV21#1407               | 289 | 20.257 | 0.001116834 | 0.018708850 | 16.75 | 0.003 |
| 873 | 1334BV21#1407               | 304 | 20.257 | 0.000550639 | 0.009274673 | 16.84 | 0.002 |
| 874 | 1334BV21#2181               | 174 | 27.244 | 0.076759875 | 0.524360195 | 6.83  | 0.061 |
| 875 | 1334BV21#2181               | 347 | 27.244 | 0.006397316 | 0.046117995 | 7.21  | 0.049 |
| 876 | 1334BV21#2181               | 405 | 27.244 | 0.004017576 | 0.033219682 | 8.27  | 0.021 |
| 877 | 1334BV27#1828               | 392 | 24.032 | 0.005148807 | 0.003309652 | 0.64  | 0.001 |
| 878 | 1334BV27#1828               | 275 | 24.032 | 0.008630734 | 0.017337191 | 2.01  | 0.113 |
| 879 | 1334BV27#2301               | 257 | 28.358 | 0.005862466 | 0.005474833 | 0.93  | 0.876 |
| 880 | 1334BV27#2301               | 188 | 28.358 | 0.004015941 | 0.008409094 | 2.09  | 0.386 |
| 881 | 1334BV27#3745               | 361 | 41.695 | 0.003380661 | 0.000300226 | 0.09  | 0.011 |
| 882 | 1334BV27#3745               | 306 | 41.695 | 0.000624497 | 0.000107688 | 0.17  | 0.012 |
| 883 | 1334BV27#3745               | 217 | 41.695 | 0.004627088 | 0.001440352 | 0.31  | 0.008 |
| 884 | 1334BV27#3812               | 361 | 42.311 | 0.002769474 | 0.000287235 | 0.10  | 0.009 |
| 885 | 1334BV27#3812               | 319 | 42.311 | 0.000384648 | 0.000349906 | 0.91  | 0.898 |
| 886 | 1334BV27#3812               | 85  | 42.311 | 0.007910860 | 0.007701379 | 0.97  | 0.693 |
| 887 | 1334BV27#3844               | 140 | 42.609 | 0.010430485 | 0.000318975 | 0.03  | 0.003 |
| 888 | 1334BV27#3844               | 361 | 42.609 | 0.004388974 | 0.023601903 | 5.38  | 0.391 |
| 889 | 1334BV27#3844               | 169 | 42.609 | 0.001386235 | 0.017553125 | 12.66 | 0.160 |
| 890 | 1334BV27#3864               | 324 | 42.790 | 0.034142062 | 0.122789808 | 3.60  | 0.058 |
| 891 | 1334BV27#3864               | 361 | 42.790 | 0.026574605 | 0.095269120 | 3.58  | 0.056 |
| 892 | 1334BV27#3864               | 450 | 42.790 | 0.006549427 | 0.023353823 | 3.57  | 0.055 |
| 893 | 1334BV27#3887               | 361 | 42.991 | 0.029196083 | 0.068627898 | 2.35  | 0.208 |
| 894 | 1334BV27#3887               | 217 | 42.991 | 0.017235647 | 0.087597288 | 5.08  | 0.034 |
| 895 | 1334BV27#3887               | 169 | 42.991 | 0.006913400 | 0.033282690 | 4.81  | 0.089 |
| 896 | 1334BV27#3920               | 361 | 43.298 | 0.016725409 | 0.000843846 | 0.05  | 0.015 |
| 897 | 1334BV27#3920               | 217 | 43.298 | 0.013138192 | 0.002319825 | 0.18  | 0.003 |
| 898 | 1334BV27#3920               | 169 | 43.298 | 0.004903558 | 0.000329791 | 0.07  | 0.009 |
| 899 | 1334BV27#4011               | 130 | 44.138 | 0.018400527 | 0.002609367 | 0.14  | 0.007 |
| 900 | 1334BV27#4011               | 155 | 44.138 | 0.007700752 | 0.001358670 | 0.18  | 0.004 |
| 901 | 1334BV27#4011               | 361 | 44.138 | 0.010177439 | 0.001132907 | 0.11  | 0.012 |
| 902 | 1334BV27#4073               | 105 | 44.722 | 0.002497047 | 0.000522845 | 0.21  | 0.001 |
| 903 | 1334BV27#4073               | 361 | 44.722 | 0.001198780 | 0.000196029 | 0.16  | 0.000 |
| 904 | 1334BV27#4073               | 217 | 44.722 | 0.002976481 | 0.000658224 | 0.22  | 0.000 |
| 905 | 1334BV27#4103               | 257 | 45.004 | 0.003400386 | 0.001069406 | 0.31  | 0.006 |
| 906 | 1334BV27#4103               | 232 | 45.004 | 0.003389181 | 0.001069544 | 0.32  | 0.003 |
| 907 | 1334BV27#4103               | 379 | 45.004 | 0.000344229 | 0.000145511 | 0.42  | 0.009 |
| 908 | 1334BV28#1746               | 275 | 23.324 | 0.078631353 | 0.205150288 | 2.61  | 0.055 |
| 909 | 1334BV28#1746               | 244 | 23.324 | 0.011378622 | 0.028077423 | 2.47  | 0.061 |
| 910 | 1334BV28#1746               | 155 | 23.324 | 0.018353590 | 0.037732600 | 2.06  | 0.046 |
| 911 | 1334BV28#1779               | 243 | 23.526 | 0.014796232 | 0.145138021 | 9.81  | 0.074 |
| 912 | 1334BV28#1779               | 345 | 23.526 | 0.001103658 | 0.018570436 | 16.83 | 0.081 |
| 913 | 1334BV28#1779               | 317 | 23.526 | 0.001587058 | 0.015961316 | 10.06 | 0.077 |
| 914 | 1334BV28#1818               | 319 | 23.978 | 0.020407771 | 0.067493383 | 3.31  | 0.096 |
| 915 | 1334BV28#1818               | 304 | 23.978 | 0.009586358 | 0.029580776 | 3.09  | 0.094 |
| 916 | 1334BV28#1818               | 190 | 23.978 | 0.010422951 | 0.033461468 | 3.21  | 0.094 |
| 917 | 1334BV28#2060               | 231 | 26.208 | 0.016512858 | 0.017962895 | 1.09  | 0.637 |
| 918 | 1334BV28#2060               | 333 | 26.208 | 0.006868354 | 0.007827631 | 1.14  | 0.522 |
| 919 | 1334BV28#2060               | 480 | 26.208 | 0.003495311 | 0.003983389 | 1.14  | 0.537 |
| 920 | 1334BV28#2242               | 200 | 27.883 | 0.001621591 | 0.016547716 | 10.20 | 0.100 |
| 921 | 1334BV28#2242               | 389 | 27.883 | 0.000519755 | 0.008306884 | 15.98 | 0.105 |
| 922 | 1334BV28#2242               | 506 | 27.883 | 0.000213683 | 0.002397423 | 11.22 | 0.035 |
| 923 | 1334BV28#2287               | 347 | 28.308 | 0.003506479 | 0.007901087 | 2.25  | 0.164 |
| 924 | 1334BV28#2287               | 232 | 28.308 | 0.022174363 | 0.042191303 | 1.90  | 0.222 |
| 925 | 1334BV28#2287               | 449 | 28.308 | 0.008606248 | 0.016733171 | 1.94  | 0.214 |
| 926 | 1334BV28#2613               | 326 | 31.222 | 0.000244618 | 0.004645181 | 18.99 | 0.132 |
| 927 | 1334BV28#2613               | 290 | 31.222 | 0.001495277 | 0.004700711 | 3.14  | 0.338 |
| 928 | 1334BV28#2613               | 428 | 31.222 | 0.000044808 | 0.001800828 | 40.19 | 0.182 |
| 929 | 1334BV28#3011               | 204 | 35.139 | 0.002229048 | 0.014234077 | 6.39  | 0.017 |
| 930 | 1334BV28#3011               | 157 | 35.139 | 0.000694391 | 0.005815730 | 8.38  | 0.020 |
| 931 | 1334BV28#3011               | 191 | 35.139 | 0.001109842 | 0.004018283 | 3.62  | 0.034 |
| 932 | 1334BV28#3022               | 204 | 35.238 | 0.001817302 | 0.005798034 | 3.19  | 0.021 |
| 933 | 1334BV28#3022               | 157 | 35.238 | 0.001300441 | 0.005924219 | 4.56  | 0.015 |

|     |                               |     |        |             |             |        |       |
|-----|-------------------------------|-----|--------|-------------|-------------|--------|-------|
| 934 | 1334BV28#3022                 | 331 | 35.238 | 0.000322587 | 0.001162896 | 3.60   | 0.011 |
| 935 | 1334BV28#3050                 | 105 | 35.495 | 0.008944735 | 0.019234923 | 2.15   | 0.013 |
| 936 | 1334BV28#3050                 | 331 | 35.495 | 0.000640286 | 0.001064442 | 1.66   | 0.063 |
| 937 | 1334BV28#3050                 | 217 | 35.495 | 0.008900363 | 0.018340451 | 2.06   | 0.021 |
| 938 | 1334BV28#3103                 | 446 | 35.994 | 0.000217800 | 0.001308159 | 6.01   | 0.047 |
| 939 | 1334BV28#3103                 | 415 | 35.994 | 0.000256213 | 0.000297333 | 1.16   | 0.774 |
| 940 | 1334BV28#3103                 | 217 | 35.994 | 0.002248716 | 0.002723707 | 1.21   | 0.811 |
| 941 | 1334BV28#3422                 | 406 | 38.997 | 0.008926911 | 0.009791972 | 1.10   | 0.709 |
| 942 | 1334BV28#3422                 | 217 | 38.997 | 0.021370673 | 0.024064637 | 1.13   | 0.314 |
| 943 | 1334BV28#3422                 | 495 | 38.997 | 0.000959209 | 0.001018094 | 1.06   | 0.821 |
| 944 | 1334BV28#3687                 | 324 | 41.474 | 0.001342134 | 0.003999236 | 2.98   | 0.041 |
| 945 | 1334BV28#3687                 | 450 | 41.474 | 0.000276310 | 0.000719761 | 2.60   | 0.030 |
| 946 | 1334BV28#3687                 | 361 | 41.474 | 0.001621370 | 0.003416887 | 2.11   | 0.074 |
| 947 | 1334BV28#3753                 | 204 | 42.076 | 0.006068684 | 0.054635357 | 9.00   | 0.018 |
| 948 | 1334BV28#3753                 | 357 | 42.076 | 0.000319872 | 0.002945849 | 9.21   | 0.022 |
| 949 | 1334BV28#3753                 | 239 | 42.076 | 0.000462270 | 0.003175714 | 6.87   | 0.023 |
| 950 | 1334BV28#3871                 | 354 | 43.152 | 0.005009290 | 0.016155305 | 3.23   | 0.071 |
| 951 | 1334BV28#3871                 | 361 | 43.152 | 0.003665552 | 0.009054139 | 2.47   | 0.108 |
| 952 | 1334BV28#3871                 | 450 | 43.152 | 0.001083007 | 0.003358985 | 3.10   | 0.067 |
| 953 | 1338AU05#2775#sorbitol-6-P    | 387 | 34.463 | 0.000034372 | 0.000080458 | 2.34   | 0.009 |
| 954 | 1338AU05#2775#sorbitol-6-P    | 299 | 34.463 | 0.000054872 | 0.000152913 | 2.79   | 0.103 |
| 955 | 1338AU05#2775#sorbitol-6-P    | 315 | 34.463 | 0.000060398 | 0.000123405 | 2.04   | 0.128 |
| 956 | 1338AU07#2713#gal-6-P MX1     | 299 | 33.813 | 0.014568047 | 0.017594336 | 1.21   | 0.746 |
| 957 | 1338AU07#2713#gal-6-P MX1     | 387 | 33.813 | 0.011427841 | 0.014067406 | 1.23   | 0.707 |
| 958 | 1338AU07#2713#gal-6-P MX1     | 160 | 33.813 | 0.006048712 | 0.006774201 | 1.12   | 0.833 |
| 959 | 1338AU07#2745#gal-6-P MX2     | 387 | 34.107 | 0.002349542 | 0.002896190 | 1.23   | 0.678 |
| 960 | 1338AU12#1860#glyceric-3-P    | 299 | 25.932 | 0.002276334 | 0.002103324 | 0.92   | 0.874 |
| 961 | 1338AU12#1860#glyceric-3-P    | 387 | 25.932 | 0.000653640 | 0.000585969 | 0.90   | 0.855 |
| 962 | 1338AU12#1860#glyceric-3-P    | 459 | 25.932 | 0.000372859 | 0.000298805 | 0.80   | 0.670 |
| 963 | 1340AU03#1851#p-aminobenzoic  | 266 | 26.300 | 0.000524525 | 0.000543829 | 1.04   | 0.731 |
| 964 | 1340AU03#1851#p-aminobenzoic  | 281 | 26.300 | 0.000549160 | 0.000649973 | 1.18   | 0.643 |
| 965 | 1340AU03#1851#p-aminobenzoic  | 222 | 26.300 | 0.000927163 | 0.001551470 | 1.67   | 0.016 |
| 966 | 1340AU04#0792#norleucine 2    | 158 | 16.236 | 0.000130691 | 0.000110449 | 0.85   | 0.653 |
| 967 | 1340AU04#0792#norleucine 2    | 232 | 16.236 | 0.000067486 | 0.000076547 | 1.13   | 0.752 |
| 968 | 1340AU04#0792#norleucine 2    | 260 | 16.236 | 0.000084319 | 0.000166772 | 1.98   | 0.056 |
| 969 | 1340AU06#1981#allantoin 4     | 331 | 27.205 | 0.121616384 | 0.171574450 | 1.41   | 0.276 |
| 970 | 1340AU06#1981#allantoin 4     | 431 | 27.205 | 0.016144958 | 0.030527353 | 1.89   | 0.167 |
| 971 | 1340AU06#1981#allantoin 4     | 446 | 27.205 | 0.020271134 | 0.030455739 | 1.50   | 0.287 |
| 972 | 1340AU06#2014#allantoin 5     | 518 | 27.512 | 0.000113620 | 0.001715065 | 15.09  | 0.087 |
| 973 | 1340AU06#2014#allantoin 5     | 428 | 27.512 | 0.000076290 | 0.001182021 | 15.49  | 0.068 |
| 974 | 1340AU06#2014#allantoin 5     | 403 | 27.512 | 0.000490491 | 0.001264413 | 2.58   | 0.052 |
| 975 | 1340AU07#1942#adenine         | 264 | 26.916 | 0.004172510 | 0.019493590 | 4.67   | 0.299 |
| 976 | 1340AU07#1942#adenine         | 279 | 26.916 | 0.000138574 | 0.046455110 | 335.24 | 0.150 |
| 977 | 1340AU07#1942#adenine         | 192 | 26.916 | 0.000692606 | 0.002290696 | 3.31   | 0.352 |
| 978 | 1340AU09#2378#guanine         | 352 | 31.071 | 0.000100490 | 0.000431856 | 4.30   | 0.331 |
| 979 | 1340AU09#2378#guanine         | 367 | 31.071 | 0.000061035 | 0.000160780 | 2.63   | 0.355 |
| 980 | 1340AU09#2378#guanine         | 264 | 31.071 | 0.000231878 | 0.000328923 | 1.42   | 0.112 |
| 981 | 1340AU10#1717#aconitic        | 285 | 24.894 | 0.002253935 | 0.002313722 | 1.03   | 0.941 |
| 982 | 1340AU10#1717#aconitic        | 375 | 24.894 | 0.002577139 | 0.002809309 | 1.09   | 0.804 |
| 983 | 1340AU10#1717#aconitic        | 229 | 24.894 | 0.006563518 | 0.007905080 | 1.20   | 0.604 |
| 984 | 1340AU11#2058#p-coumaric      | 249 | 28.101 | 0.001373479 | 0.005662775 | 4.12   | 0.000 |
| 985 | 1340AU11#2058#p-coumaric      | 293 | 28.101 | 0.001276234 | 0.008233213 | 6.45   | 0.024 |
| 986 | 1340AU11#2058#p-coumaric      | 308 | 28.101 | 0.000912952 | 0.003314604 | 3.63   | 0.000 |
| 987 | 1340AU12#1826#o-coumaric      | 293 | 25.885 | 0.001272837 | 0.002693781 | 2.12   | 0.067 |
| 988 | 1340AU12#1826#o-coumaric      | 308 | 25.885 | 0.000455315 | 0.000334616 | 0.73   | 0.069 |
| 989 | 1340AU12#1826#o-coumaric      | 161 | 25.885 | 0.005502369 | 0.003500426 | 0.64   | 0.062 |
| 990 | 1340AU14#3254#adenosine       | 322 | 38.986 | 0.000058602 | 0.000082017 | 1.40   | 0.364 |
| 991 | 1340AU14#3254#adenosine       | 465 | 38.986 | 0.000081466 | 0.000108982 | 1.34   | 0.284 |
| 992 | 1340AU14#3254#adenosine       | 540 | 38.986 | 0.000014528 | 0.000030839 | 2.12   | 0.235 |
| 993 | 1340AU15#2109#indole-3-acetic | 202 | 28.475 | 0.000429350 | 0.000307773 | 0.72   | 0.263 |
| 994 | 1340AU15#2109#indole-3-acetic | 319 | 28.475 | 0.002000618 | 0.003029821 | 1.51   | 0.262 |
| 995 | 1340AU15#2109#indole-3-acetic | 276 | 28.475 | 0.000153173 | 0.000246726 | 1.61   | 0.186 |
| 996 | 1340AU18#2564#spermidine      | 156 | 32.807 | 0.000509953 | 0.003103406 | 6.09   | 0.042 |

|      |                                |         |        |             |             |       |       |
|------|--------------------------------|---------|--------|-------------|-------------|-------|-------|
| 997  | 1340AU20#1028#S-me-cysteine 2  | 162     | 18.434 | 0.007715882 | 0.010947392 | 1.42  | 0.229 |
| 998  | 1340AU20#1028#S-me-cysteine 2  | 218     | 18.434 | 0.001800694 | 0.002624155 | 1.46  | 0.214 |
| 999  | 1340AU20#1028#S-me-cysteine 2  | 236     | 18.434 | 0.001211648 | 0.001413474 | 1.17  | 0.580 |
| 1000 | 1340AU21#0999#glutaric         | 158     | 18.132 | 0.009639941 | 0.002113285 | 0.22  | 0.272 |
| 1001 | 1340AU21#0999#glutaric         | 261     | 18.132 | 0.001363217 | 0.001654179 | 1.21  | 0.373 |
| 1002 | 1340AU21#0999#glutaric         | 233     | 18.132 | 0.000378859 | 0.000582979 | 1.54  | 0.126 |
| 1003 | 2009AU02#4302                  | 204     | 46.743 | 0.001053344 | 0.034348591 | 32.61 | 0.080 |
| 1004 | 2009AU02#4302                  | 191     | 46.743 | 0.000711295 | 0.000847464 | 1.19  | 0.577 |
| 1005 | 2009AU02#4302                  | 259     | 46.743 | 0.000137011 | 0.000171878 | 1.25  | 0.476 |
| 1006 | 2009AU04#3664#melibiose MX1    | 204     | 40.845 | 0.004483764 | 0.010750498 | 2.40  | 0.142 |
| 1007 | 2009AU04#3664#melibiose MX1    | 361     | 40.845 | 0.001743186 | 0.004564713 | 2.62  | 0.168 |
| 1008 | 2009AU04#3664#melibiose MX1    | 480     | 40.845 | 0.000077695 | 0.000239514 | 3.08  | 0.086 |
| 1009 | 2009AU04#4352#melezitose       | 361     | 47.192 | 0.000055583 | 0.000090267 | 1.62  | 0.144 |
| 1010 | 2009AU04#4352#melezitose       | 451     | 47.192 | 0.000053676 | 0.000066278 | 1.23  | 0.254 |
| 1011 | 2009AU04#4352#melezitose       | 271     | 47.192 | 0.000070844 | 0.000117343 | 1.66  | 0.247 |
| 1012 | 2009AU07#3699#melibiose MX2    | 204     | 41.168 | 0.000945727 | 0.002132915 | 2.26  | 0.081 |
| 1013 | 2009AU07#3699#melibiose MX2    | 361     | 41.168 | 0.000628316 | 0.001175954 | 1.87  | 0.308 |
| 1014 | 2009AU07#3699#melibiose MX2    | 160     | 41.168 | 0.000197455 | 0.000311471 | 1.58  | 0.324 |
| 1015 | 2009AU13#3506#trehalose        | 169     | 39.356 | 0.011339495 | 0.002583036 | 0.23  | 0.002 |
| 1016 | 2009AU13#3506#trehalose        | 361     | 39.356 | 0.041454075 | 0.012792500 | 0.31  | 0.004 |
| 1017 | 2015BV03#0799#serine 2         | 219     | 14.818 | 0.049917675 | 0.148711121 | 2.98  | 0.013 |
| 1018 | 2015BV03#1056#serine 3         | 204     | 17.133 | 0.504363774 | 1.265221491 | 2.51  | 0.014 |
| 1019 | 2015BV03#1056#serine 3         | 278     | 17.133 | 0.030100489 | 0.071089877 | 2.36  | 0.017 |
| 1020 | 2015BV30#2713#tryptamine       | 174     | 32.434 | 0.001084910 | 0.002576798 | 2.38  | 0.196 |
| 1021 | 2015BV30#2713#tryptamine       | 273     | 32.434 | 0.000147028 | 0.000154732 | 1.05  | 0.859 |
| 1022 | 2015BV30#2713#tryptamine       | 361     | 32.434 | 0.000217042 | 0.000078787 | 0.36  | 0.102 |
| 1023 | 2066BN03#1003#nicotine         | 84      | 16.891 | 0.004066925 | 0.001087417 | 0.27  | 0.237 |
| 1024 | 2066BN03#1003#nicotine         | 133     | 16.891 | 0.067464640 | 0.058289173 | 0.86  | 0.839 |
| 1025 | 2066BN03#1003#nicotine         | 161+162 | 16.891 | 0.000721811 | 0.000607488 | 0.84  | 0.716 |
| 1026 | 2066BN03#1003#nicotine         | 85      | 16.891 | 0.005651316 | 0.002788305 | 0.49  | 0.066 |
| 1027 | 2066BN03#1382#salicylic        | 267     | 20.265 | 0.002370749 | 0.006056375 | 2.55  | 0.001 |
| 1028 | 2066BN03#1382#salicylic        | 268     | 20.265 | 0.000673220 | 0.001791272 | 2.66  | 0.006 |
| 1029 | 2066BN03#1382#salicylic        | 209     | 20.265 | 0.000340864 | 0.001060558 | 3.11  | 0.000 |
| 1030 | 2066BN03#1382#salicylic        | 91      | 20.265 | 0.000628506 | 0.001280234 | 2.04  | 0.020 |
| 1031 | 2066BN03#1722#t-o-coumaric     | 190     | 23.300 | 0.001532001 | 0.002471109 | 1.61  | 0.002 |
| 1032 | 2066BN03#1722#t-o-coumaric     | 293     | 23.300 | 0.000344601 | 0.000292729 | 0.85  | 0.731 |
| 1033 | 2066BN03#1722#t-o-coumaric     | 308     | 23.300 | 0.003243961 | 0.003383280 | 1.04  | 0.933 |
| 1034 | 2066BN03#1722#t-o-coumaric     | 161     | 23.300 | 0.001940946 | 0.001773588 | 0.91  | 0.731 |
| 1035 | 2077BN06#1973#galactonic       | 333     | 28.978 | 0.009369537 | 0.012142868 | 1.30  | 0.097 |
| 1036 | 2077BN06#1973#galactonic       | 292     | 28.978 | 0.026017536 | 0.035585286 | 1.37  | 0.063 |
| 1037 | 2077BN06#1973#galactonic       | 423     | 28.978 | 0.000566325 | 0.000823679 | 1.45  | 0.012 |
| 1038 | 2077BN06#1973#galactonic       | 433     | 28.978 | 0.002489599 | 0.003244828 | 1.30  | 0.086 |
| 1039 | 2077BN07#1944#gulonic          | 333     | 28.433 | 0.003586838 | 0.004533145 | 1.26  | 0.085 |
| 1040 | 2077BN07#1944#gulonic          | 292     | 28.433 | 0.002829432 | 0.003924267 | 1.39  | 0.058 |
| 1041 | 2077BN07#1944#gulonic          | 423     | 28.433 | 0.000282696 | 0.000408878 | 1.45  | 0.004 |
| 1042 | 2077BN07#1944#gulonic          | 433     | 28.433 | 0.000353399 | 0.000445986 | 1.26  | 0.123 |
| 1043 | 2077BN11#1910#glucuronic MX1   | 333     | 28.018 | 0.005666365 | 0.006181160 | 1.09  | 0.519 |
| 1044 | 2077BN11#1910#glucuronic MX1   | 160     | 28.018 | 0.003797993 | 0.005534460 | 1.46  | 0.125 |
| 1045 | 2077BN11#1910#glucuronic MX1   | 423     | 28.018 | 0.000340378 | 0.000313353 | 0.92  | 0.587 |
| 1046 | 2077BN11#1932#glucuronic MX2   | 160     | 28.245 | 0.002865272 | 0.002929814 | 1.02  | 0.938 |
| 1047 | 2077BN11#1932#glucuronic MX2   | 292     | 28.245 | 0.002945451 | 0.003556788 | 1.21  | 0.537 |
| 1048 | 2077BN11#1932#glucuronic MX2   | 393     | 28.245 | 0.000088388 | 0.004602512 | 52.07 | 0.174 |
| 1049 | 2081BN03#2686#t-3,5ME4OHcin MX | 174     | 30.838 | 0.001444959 | 0.002298169 | 1.59  | 0.264 |
| 1050 | 2081BN03#2686#t-3,5ME4OHcin MX | 248     | 30.838 | 0.000135322 | 0.000186722 | 1.38  | 0.145 |
| 1051 | 2081BN03#2686#t-3,5ME4OHcin MX | 309     | 30.838 | 0.000229548 | 0.000220043 | 0.96  | 0.800 |
| 1052 | 2081BN04#2381#coniferyl alcol  | 324     | 28.143 | 0.000405554 | 0.001053603 | 2.60  | 0.010 |
| 1053 | 2081BN04#2381#coniferyl alcol  | 293     | 28.143 | 0.001243645 | 0.004692132 | 3.77  | 0.269 |
| 1054 | 2081BN04#2381#coniferyl alcol  | 235     | 28.143 | 0.001049126 | 0.011634623 | 11.09 | 0.000 |
| 1055 | 2081BN05#2389#t-3ME4OHcin MX2  | 248     | 28.252 | 0.000495387 | 0.000526635 | 1.06  | 0.866 |
| 1056 | 2081BN05#2389#t-3ME4OHcin MX2  | 279     | 28.252 | 0.000099557 | 0.000742359 | 7.46  | 0.349 |
| 1057 | 2081BN05#2389#t-3ME4OHcin MX2  | 218     | 28.252 | 0.002171673 | 0.002798449 | 1.29  | 0.216 |
| 1058 | 2081BN05#2406#t-3ME4OHcin MX1  | 279     | 28.437 | 0.000150701 | 0.000130429 | 0.87  | 0.744 |
| 1059 | 2081BN05#2406#t-3ME4OHcin MX1  | 248     | 28.437 | 0.000719998 | 0.000586638 | 0.81  | 0.590 |

|      |                               |     |        |             |             |      |       |
|------|-------------------------------|-----|--------|-------------|-------------|------|-------|
| 1060 | 2081BN05#2406#t-3ME4OHcin MX1 | 218 | 28.437 | 0.006191538 | 0.009528204 | 1.54 | 0.467 |
| 1061 | 2081BN06#2646#sinapyl alkol   | 354 | 30.473 | 0.000258374 | 0.000391473 | 1.52 | 0.042 |
| 1062 | 2081BN06#2646#sinapyl alkol   | 234 | 30.473 | 0.001765306 | 0.002417935 | 1.37 | 0.285 |
| 1063 | 2081BN06#2646#sinapyl alkol   | 323 | 30.473 | 0.001680100 | 0.001106983 | 0.66 | 0.535 |
| 1064 | 2081BN09#3943                 | 556 | 41.942 | 0.000029185 | 0.000027039 | 0.93 | 0.895 |
| 1065 | 2081BN09#3943                 | 526 | 41.942 | 0.000015893 | 0.000035409 | 2.23 | 0.434 |
| 1066 | 2081BN09#3943                 | 279 | 41.942 | 0.000088440 | 0.000074450 | 0.84 | 0.512 |
| 1067 | 2081BN33#3156                 | 174 | 35.040 | 0.000254990 | 0.000930632 | 3.65 | 0.067 |
| 1068 | 2081BN33#3156                 | 324 | 35.040 | 0.000066676 | 0.000117924 | 1.77 | 0.175 |
| 1069 | 2081BN33#3156                 | 455 | 35.040 | 0.000035595 | 0.000054411 | 1.53 | 0.253 |
| 1070 | 2081BN33#3665                 | 556 | 39.454 | 0.000026138 | 0.000017616 | 0.67 | 0.209 |
| 1071 | 2081BN33#3665                 | 526 | 39.454 | 0.000047280 | 0.000055403 | 1.17 | 0.667 |
| 1072 | 2081BN33#3665                 | 279 | 39.454 | 0.000120176 | 0.000445700 | 3.71 | 0.333 |

Induced starvation, date point 2 (i2)

| #  | NAME                           | Q_TRACE | PRED_RT | Avg Resp nS | Avg Resp -S | R -S/nS | P-value |
|----|--------------------------------|---------|---------|-------------|-------------|---------|---------|
| 1  | 1090DK05#4896#1-t-caffeoquinic | 307     | 46.502  | 0.000805331 | 0.000527039 | 0.65    | 0.309   |
| 2  | 1090DK05#4896#1-t-caffeoquinic | 324     | 46.502  | 0.000054317 | 0.000053438 | 0.98    | 0.947   |
| 3  | 1090DK05#4896#1-t-caffeoquinic | 219     | 46.502  | 0.008658157 | 0.010531801 | 1.22    | 0.708   |
| 4  | 1164CC35#1780#arginine 5       | 256     | 26.181  | 0.340906202 | 0.077629880 | 0.23    | 0.033   |
| 5  | 1164CC35#1780#arginine 5       | 157     | 26.181  | 0.375108533 | 0.133490182 | 0.36    | 0.184   |
| 6  | 1164CC37#1216                  | 243     | 20.159  | 0.343317242 | 0.555506586 | 1.62    | 0.212   |
| 7  | 1164CC37#1220                  | 142     | 20.257  | 0.019096510 | 0.183341506 | 9.60    | 0.002   |
| 8  | 1164CC37#1267                  | 232     | 20.717  | 0.161007463 | 0.033283764 | 0.21    | 0.411   |
| 9  | 1164CC37#1280                  | 155     | 20.807  | 0.326032307 | 2.637836786 | 8.09    | 0.028   |
| 10 | 1164CC37#1378                  | 301     | 21.835  | 0.057334115 | 0.232780640 | 4.06    | 0.210   |
| 11 | 1164CC37#1378                  | 227     | 21.835  | 0.185438459 | 0.909991602 | 4.91    | 0.069   |
| 12 | 1164CC37#1378                  | 344     | 21.835  | 0.098204784 | 0.487069313 | 4.96    | 0.063   |
| 13 | 1164CC37#1705#glutamine 3      | 156     | 25.296  | 2.640348302 | 2.858978172 | 1.08    | 0.676   |
| 14 | 1164CC37#1705#glutamine 3      | 245     | 25.296  | 1.128704689 | 4.476564473 | 3.97    | 0.002   |
| 15 | 1164CC37#1965                  | 204     | 28.073  | 1.079669638 | 2.945352221 | 2.73    | 0.012   |
| 16 | 1194BK05#2052#ornithine 4      | 420     | 25.990  | 0.377902599 | 0.023504089 | 0.06    | 0.336   |
| 17 | 1194BK05#2052#ornithine 4      | 142     | 25.990  | 1.189627866 | 0.463218672 | 0.39    | 0.061   |
| 18 | 1194BK05#2052#ornithine 4      | 174     | 25.990  | 0.521286923 | 0.239550101 | 0.46    | 0.228   |
| 19 | 1194BK09#2389#glutamine 4      | 227     | 28.996  | 0.104926357 | 0.438969630 | 4.18    | 0.065   |
| 20 | 1194BK09#2389#glutamine 4      | 317     | 28.996  | 0.027528333 | 0.108977703 | 3.96    | 0.066   |
| 21 | 1194BK09#2389#glutamine 4      | 156     | 28.996  | 0.031371828 | 0.112160942 | 3.58    | 0.068   |
| 22 | 1194BK11#1453#t-4-HO-proline   | 230     | 20.567  | 0.548761050 | 1.290033493 | 2.35    | 0.006   |
| 23 | 1194BK11#1453#t-4-HO-proline   | 140     | 20.567  | 0.123457215 | 0.302930429 | 2.45    | 0.015   |
| 24 | 1194BK11#1453#t-4-HO-proline   | 304     | 20.567  | 1.079236513 | 0.000315892 | 0.00    | 0.391   |
| 25 | 1194BK15#1922#arginine 3       | 174     | 24.834  | 0.230368644 | 0.037220311 | 0.16    | 0.064   |
| 26 | 1194BK15#1922#ornithine 3      | 174     | 24.834  | 0.240335489 | 0.037220311 | 0.15    | 0.039   |
| 27 | 1194BK15#1922#ornithine 3      | 186     | 24.834  | 0.068262107 | 0.008444983 | 0.12    | 0.044   |
| 28 | 1194BK15#1922#ornithine 3      | 348     | 24.834  | 0.068892270 | 0.002187757 | 0.03    | 0.246   |
| 29 | 1194BK15#2050#arginine 4       | 142     | 25.990  | 1.044993836 | 0.463218672 | 0.44    | 0.214   |
| 30 | 1194BK20#2225#gal MX2          | 160     | 27.625  | 0.238879605 | 0.606187635 | 2.54    | 0.230   |
| 31 | 1215BK02#1748#arabinose MX     | 217     | 23.253  | 0.036078036 | 0.033142784 | 0.92    | 0.734   |
| 32 | 1215BK02#1748#arabinose MX     | 307     | 23.253  | 0.017228751 | 0.017002256 | 0.99    | 0.970   |
| 33 | 1215BK02#1753#arabinose MX     | 160     | 23.253  | 0.017569245 | 0.008940704 | 0.51    | 0.256   |
| 34 | 1215BK03#1782#ribose MX        | 217     | 23.568  | 0.047405372 | 0.044367462 | 0.94    | 0.667   |
| 35 | 1215BK04#1717#xylose MX1       | 307     | 22.988  | 0.003766654 | 0.003571405 | 0.95    | 0.861   |
| 36 | 1215BK04#1717#xylose MX1       | 160     | 22.988  | 0.002944279 | 0.001203808 | 0.41    | 0.391   |
| 37 | 1215BK04#1738#xylose MX2       | 160     | 23.178  | 0.010036064 | 0.008826218 | 0.88    | 0.524   |
| 38 | 1215BK05#3504#maltose MX1      | 480     | 39.300  | 0.001307740 | 0.000431823 | 0.33    | 0.164   |
| 39 | 1215BK05#3540#maltose MX2      | 204     | 39.594  | 0.023434755 | 0.014799655 | 0.63    | 0.395   |
| 40 | 1215BK07#1896#fucose MX1       | 160     | 24.395  | 0.022248938 | 0.019108821 | 0.86    | 0.253   |
| 41 | 1215BK07#1896#fucose MX1       | 160     | 24.395  | 0.192223425 | 0.019108821 | 0.10    | 0.379   |
| 42 | 1215BK07#1896#fucose MX2       | 160     | 24.595  | 0.012298044 | 0.003759943 | 0.31    | 0.356   |
| 43 | 1215BK07#1896#fucose MX2       | 117     | 24.595  | 0.039607732 | 0.043192921 | 1.09    | 0.805   |
| 44 | 1215BK09#2256#mannitol         | 319     | 27.889  | 0.007380997 | 0.010333619 | 1.40    | 0.247   |
| 45 | 1215BK09#2256#mannitol         | 307     | 27.889  | 0.001717921 | 0.001491320 | 0.87    | 0.680   |
| 46 | 1215BK09#2256#mannitol         | 421     | 27.889  | 0.000845686 | 0.000276457 | 0.33    | 0.365   |

|     |                                |     |        |             |             |       |       |
|-----|--------------------------------|-----|--------|-------------|-------------|-------|-------|
| 47  | 1215BK11#1416#erythritol       | 205 | 20.277 | 0.014454994 | 0.019005027 | 1.31  | 0.396 |
| 48  | 1215BK11#1416#erythritol       | 320 | 20.277 | 0.001785132 | 0.001661424 | 0.93  | 0.630 |
| 49  | 1215BK11#1416#erythritol       | 293 | 20.277 | 0.004809236 | 0.002784512 | 0.58  | 0.366 |
| 50  | 1215BK12#2269#sorbitol         | 319 | 28.002 | 0.008048303 | 0.010333619 | 1.28  | 0.381 |
| 51  | 1215BK12#2269#sorbitol         | 307 | 28.002 | 0.001376462 | 0.001491320 | 1.08  | 0.830 |
| 52  | 1215BK12#2269#sorbitol         | 419 | 28.002 | 0.005047468 | 0.000266809 | 0.05  | 0.385 |
| 53  | 1215BK13#2273#galactitol       | 307 | 28.086 | 0.002274504 | 0.007800719 | 3.43  | 0.000 |
| 54  | 1215BK13#2273#galactitol       | 421 | 28.086 | 0.000405335 | 0.000199903 | 0.49  | 0.549 |
| 55  | 1215BK13#2273#galactitol       | 331 | 28.086 | 0.003710896 | 0.009577964 | 2.58  | 0.000 |
| 56  | 1215BK14#1835#xylitol          | 307 | 24.083 | 0.000917678 | 0.001746075 | 1.90  | 0.034 |
| 57  | 1215BK14#1835#xylitol          | 319 | 24.083 | 0.011073140 | 0.001919307 | 0.17  | 0.365 |
| 58  | 1215BK15#3625#maltitol         | 191 | 40.453 | 0.001608138 | 0.001394650 | 0.87  | 0.740 |
| 59  | 1215BK15#3625#maltitol         | 361 | 40.453 | 0.002261088 | 0.003968077 | 1.75  | 0.153 |
| 60  | 1215BK16#1857#rhamnose MX1     | 364 | 24.249 | 0.006115433 | 0.000537921 | 0.09  | 0.389 |
| 61  | 1215BK16#1867#rhamnose MX2     | 117 | 24.348 | 0.580520824 | 0.712842355 | 1.23  | 0.534 |
| 62  | 1215BK16#1867#rhamnose MX2     | 160 | 24.348 | 0.021750336 | 0.019108821 | 0.88  | 0.395 |
| 63  | 1215BK22#1328#citramalic       | 349 | 19.462 | 0.000806694 | 0.000182626 | 0.23  | 0.408 |
| 64  | 1215BK22#1328#citramalic       | 247 | 19.462 | 0.004155548 | 0.001892210 | 0.46  | 0.238 |
| 65  | 1215BK38#1269#homoserine 3     | 218 | 19.050 | 0.003018729 | 0.004168526 | 1.38  | 0.351 |
| 66  | 1215BK38#1269#homoserine 3     | 292 | 19.050 | 0.000369619 | 0.000145607 | 0.39  | 0.411 |
| 67  | 1215BK38#1557#a-kt-glutaric MX | 198 | 21.703 | 0.030342595 | 0.042530441 | 1.40  | 0.190 |
| 68  | 1215BK38#1557#a-kt-glutaric MX | 288 | 21.703 | 0.011691238 | 0.013949359 | 1.19  | 0.242 |
| 69  | 1215BK38#1557#a-kt-glutaric MX | 304 | 21.703 | 0.012321839 | 0.011663650 | 0.95  | 0.821 |
| 70  | 1215BK38#1724#homocysteine 3   | 234 | 23.251 | 0.002229095 | 0.002526382 | 1.13  | 0.720 |
| 71  | 1215BK38#1724#homocysteine 3   | 351 | 23.251 | 0.000213560 | 0.000310973 | 1.46  | 0.502 |
| 72  | 1215BK38#1724#homocysteine 3   | 261 | 23.251 | 0.004743424 | 0.000462050 | 0.10  | 0.411 |
| 73  | 1215BK38#2153#gal MX1          | 160 | 27.304 | 0.074263045 | 0.068719566 | 0.93  | 0.640 |
| 74  | 1215BK38#2153#gal MX1          | 319 | 27.304 | 0.133844902 | 0.147692002 | 1.10  | 0.481 |
| 75  | 1215BK38#2153#gal MX1          | 205 | 27.304 | 0.113426834 | 0.159403160 | 1.41  | 0.338 |
| 76  | 1215BK38#2207#c-ferulic        | 293 | 27.793 | 0.001089161 | 0.001369894 | 1.26  | 0.535 |
| 77  | 1215BK38#2207#c-ferulic        | 249 | 27.793 | 0.000609752 | 0.000525995 | 0.86  | 0.642 |
| 78  | 1215BK38#2207#c-ferulic        | 338 | 27.793 | 0.000663083 | 0.000365863 | 0.55  | 0.307 |
| 79  | 1215BK38#2439#c-sinapic        | 338 | 30.024 | 0.019070783 | 0.019835396 | 1.04  | 0.769 |
| 80  | 1215BK38#2439#c-sinapic        | 368 | 30.024 | 0.015407886 | 0.019077048 | 1.24  | 0.372 |
| 81  | 1215BK38#2439#c-sinapic        | 323 | 29.907 | 0.005183165 | 0.006680166 | 1.29  | 0.427 |
| 82  | 1219BK04#2184#galactonic-1,4-L | 334 | 27.254 | 0.030813566 | 0.105783988 | 3.43  | 0.072 |
| 83  | 1219BK04#2184#galactonic-1,4-L | 361 | 27.254 | 0.002351050 | 0.006825504 | 2.90  | 0.002 |
| 84  | 1219BK04#2184#galactonic-1,4-L | 466 | 27.254 | 0.034761377 | 0.001309061 | 0.04  | 0.389 |
| 85  | 1219BK05#2185#a-kt-gulonic MX  | 349 | 27.346 | 0.013836616 | 0.002970657 | 0.21  | 0.401 |
| 86  | 1219BK05#2185#a-kt-gulonic MX  | 186 | 27.346 | 0.055397513 | 0.033163385 | 0.60  | 0.336 |
| 87  | 1219BK07#2218#gulonic-1,4-L    | 333 | 27.850 | 0.004102770 | 0.004649168 | 1.13  | 0.757 |
| 88  | 1219BK07#2218#gulonic-1,4-L    | 466 | 27.850 | 0.002107355 | 0.000222874 | 0.11  | 0.410 |
| 89  | 1219BK07#2218#gulonic-1,4-L    | 243 | 27.850 | 0.002025259 | 0.029003470 | 14.32 | 0.139 |
| 90  | 1248BK08#0805                  | 117 | 14.496 | 0.013751669 | 0.009277090 | 0.67  | 0.082 |
| 91  | 1248BK08#0815#benzoic          | 179 | 14.591 | 0.019554642 | 0.016071924 | 0.82  | 0.284 |
| 92  | 1248BK08#0815#benzoic          | 105 | 14.591 | 0.013189203 | 0.012869420 | 0.98  | 0.919 |
| 93  | 1248BK08#0856#urea             | 189 | 14.931 | 0.979290093 | 0.025701896 | 0.03  | 0.192 |
| 94  | 1248BK08#0931#threonine 2      | 219 | 15.643 | 0.087176089 | 0.131556660 | 1.51  | 0.101 |
| 95  | 1248BK08#0931#threonine 2      | 117 | 15.643 | 0.248392618 | 0.424835250 | 1.71  | 0.113 |
| 96  | 1248BK08#0953#glycine 3        | 174 | 15.840 | 0.146726587 | 0.176297979 | 1.20  | 0.574 |
| 97  | 1248BK08#0953#glycine 3        | 248 | 15.840 | 0.038306740 | 0.025531808 | 0.67  | 0.372 |
| 98  | 1248BK08#0990                  | 306 | 16.178 | 0.005264258 | 0.000047556 | 0.01  | 0.389 |
| 99  | 1248BK08#1020                  | 184 | 16.441 | 0.031662627 | 0.032559869 | 1.03  | 0.916 |
| 100 | 1248BK08#1020                  | 285 | 16.441 | 0.009352599 | 0.010547102 | 1.13  | 0.747 |
| 101 | 1248BK08#1043#uracil 2         | 241 | 16.639 | 0.051138411 | 0.002380572 | 0.05  | 0.393 |
| 102 | 1248BK08#1056                  | 259 | 16.761 | 0.001215518 | 0.000492661 | 0.41  | 0.260 |
| 103 | 1248BK08#1107#thymine 2        | 255 | 17.231 | 0.091222109 | 0.000557695 | 0.01  | 0.390 |
| 104 | 1248BK08#1121                  | 257 | 17.348 | 0.000446166 | 0.000049099 | 0.11  | 0.379 |
| 105 | 1248BK08#1128                  | 141 | 17.420 | 0.017122575 | 0.022273508 | 1.30  | 0.332 |
| 106 | 1248BK08#1180                  | 142 | 17.888 | 0.004409388 | 0.005248986 | 1.19  | 0.609 |
| 107 | 1248BK08#1196                  | 259 | 18.041 | 0.000943522 | 0.000309836 | 0.33  | 0.367 |
| 108 | 1248BK08#1214                  | 242 | 18.194 | 0.189480522 | 0.000068782 | 0.00  | 0.391 |
| 109 | 1248BK08#1214                  | 234 | 18.194 | 0.015952099 | 0.068364711 | 4.29  | 0.451 |



|     |                              |     |        |             |             |       |       |
|-----|------------------------------|-----|--------|-------------|-------------|-------|-------|
| 110 | 1248BK08#1225                | 104 | 18.293 | 0.004887917 | 0.002788697 | 0.57  | 0.006 |
| 111 | 1248BK08#1249#b-alanine 3    | 248 | 18.526 | 0.012759663 | 0.041812020 | 3.28  | 0.001 |
| 112 | 1248BK08#1249#b-alanine 3    | 290 | 18.526 | 0.008449606 | 0.010574444 | 1.25  | 0.673 |
| 113 | 1248BK08#1249#b-alanine 3    | 174 | 18.526 | 0.021181538 | 0.061856401 | 2.92  | 0.001 |
| 114 | 1248BK08#1308#homoserine 3   | 128 | 19.050 | 0.001550277 | 0.001577522 | 1.02  | 0.959 |
| 115 | 1248BK08#1340                | 255 | 19.313 | 0.015245549 | 0.001978553 | 0.13  | 0.363 |
| 116 | 1248BK08#1368                | 155 | 19.569 | 0.164797348 | 0.459293162 | 2.79  | 0.008 |
| 117 | 1248BK08#1368                | 229 | 19.565 | 0.011359935 | 0.024412429 | 2.15  | 0.007 |
| 118 | 1248BK08#1446                | 306 | 20.299 | 0.001728610 | 0.006499831 | 3.76  | 0.457 |
| 119 | 1248BK08#1463#methionine 2   | 176 | 20.453 | 0.015306676 | 0.013019979 | 0.85  | 0.453 |
| 120 | 1248BK08#1463#methionine 2   | 128 | 20.453 | 0.011101406 | 0.010917527 | 0.98  | 0.938 |
| 121 | 1248BK08#1527                | 120 | 21.054 | 0.082577363 | 0.032869238 | 0.40  | 0.298 |
| 122 | 1248BK08#1540#cysteine 3     | 294 | 21.171 | 0.001128162 | 0.009150358 | 8.11  | 0.280 |
| 123 | 1248BK08#1540#cysteine 3     | 220 | 21.171 | 0.003878758 | 0.002212053 | 0.57  | 0.215 |
| 124 | 1248BK08#1568                | 162 | 21.424 | 0.014492211 | 0.015486454 | 1.07  | 0.683 |
| 125 | 1248BK08#1568                | 218 | 21.424 | 0.044619233 | 0.034742831 | 0.78  | 0.588 |
| 126 | 1248BK08#1630                | 188 | 21.984 | 0.120990572 | 0.162417603 | 1.34  | 0.718 |
| 127 | 1248BK08#1641                | 305 | 22.084 | 0.057444931 | 0.049609171 | 0.86  | 0.744 |
| 128 | 1248BK08#1669                | 142 | 22.339 | 0.134157613 | 0.034615784 | 0.26  | 0.112 |
| 129 | 1248BK08#1669                | 348 | 22.339 | 0.010490029 | 0.002832815 | 0.27  | 0.083 |
| 130 | 1248BK08#1695                | 188 | 22.592 | 0.007047249 | 0.008156025 | 1.16  | 0.481 |
| 131 | 1248BK08#1695                | 216 | 22.592 | 0.022348230 | 0.002954147 | 0.13  | 0.277 |
| 132 | 1248BK08#1841                | 275 | 23.932 | 0.103888554 | 0.433904986 | 4.18  | 0.001 |
| 133 | 1248BK08#1852                | 173 | 24.032 | 0.165908401 | 0.427970970 | 2.58  | 0.015 |
| 134 | 1248BK08#1888                | 156 | 24.340 | 0.180731175 | 0.017719516 | 0.10  | 0.414 |
| 135 | 1248BK08#1907                | 227 | 24.517 | 0.008769837 | 0.120903899 | 13.79 | 0.013 |
| 136 | 1248BK08#1907                | 203 | 24.517 | 0.005899673 | 0.098084238 | 16.63 | 0.015 |
| 137 | 1248BK08#1907                | 317 | 24.517 | 0.002772784 | 0.036750862 | 13.25 | 0.005 |
| 138 | 1248BK08#1940                | 216 | 24.844 | 0.057919811 | 0.001988119 | 0.03  | 0.346 |
| 139 | 1248BK08#1948                | 216 | 24.919 | 0.002077647 | 0.001209506 | 0.58  | 0.574 |
| 140 | 1248BK08#1969                | 333 | 25.113 | 0.011479752 | 0.007017937 | 0.61  | 0.429 |
| 141 | 1248BK08#1969                | 292 | 25.113 | 0.027260703 | 0.032886854 | 1.21  | 0.359 |
| 142 | 1248BK08#2056                | 461 | 25.911 | 0.000074908 | 0.000056038 | 0.75  | 0.582 |
| 143 | 1248BK08#2056                | 371 | 25.911 | 0.001073666 | 0.000068122 | 0.06  | 0.223 |
| 144 | 1248BK08#2056                | 257 | 25.911 | 0.008770978 | 0.004756341 | 0.54  | 0.261 |
| 145 | 1248BK08#2264#lysine 4       | 156 | 27.765 | 0.102752929 | 0.103222651 | 1.00  | 0.985 |
| 146 | 1248BK08#2264#lysine 4       | 317 | 27.765 | 0.085407332 | 0.054385624 | 0.64  | 0.283 |
| 147 | 1248BK08#2264#lysine 4       | 174 | 27.765 | 0.246481142 | 0.150779117 | 0.61  | 0.282 |
| 148 | 1248BK08#2323                | 217 | 28.410 | 0.015308332 | 0.021085594 | 1.38  | 0.423 |
| 149 | 1248BK08#2323                | 361 | 28.410 | 0.006699837 | 0.005108594 | 0.76  | 0.593 |
| 150 | 1248BK08#2406#saccharic      | 333 | 29.208 | 0.005266840 | 0.007486186 | 1.42  | 0.051 |
| 151 | 1248BK08#2411                | 433 | 29.287 | 0.001965300 | 0.001271332 | 0.65  | 0.552 |
| 152 | 1248BK08#2411                | 205 | 29.287 | 0.005084033 | 0.007288522 | 1.43  | 0.031 |
| 153 | 1248BK08#2429                | 393 | 29.460 | 0.013772047 | 0.004034774 | 0.29  | 0.377 |
| 154 | 1248BK08#2495                | 204 | 30.096 | 0.001413402 | 0.004296853 | 3.04  | 0.156 |
| 155 | 1248BK08#2495                | 539 | 30.096 | 0.004710342 | 0.000024905 | 0.01  | 0.387 |
| 156 | 1248BK08#2495                | 333 | 29.751 | 0.027112712 | 0.019573405 | 0.72  | 0.374 |
| 157 | 1248BK08#2568                | 245 | 30.794 | 0.000511351 | 0.000374703 | 0.73  | 0.620 |
| 158 | 1248BK08#2568                | 257 | 30.794 | 0.000159535 | 0.000349070 | 2.19  | 0.030 |
| 159 | 1248BK08#2568                | 292 | 30.794 | 0.014562766 | 0.000314842 | 0.02  | 0.391 |
| 160 | 1248BK08#2588                | 228 | 30.986 | 0.002917987 | 0.000357381 | 0.12  | 0.378 |
| 161 | 1248BK08#2664                | 437 | 31.721 | 0.000173925 | 0.000081176 | 0.47  | 0.431 |
| 162 | 1248BK08#2720#9,12(Z,Z)-18:2 | 337 | 32.269 | 0.000518540 | 0.000149506 | 0.29  | 0.406 |
| 163 | 1248BK08#2771                | 373 | 32.768 | 0.015405100 | 0.000147361 | 0.01  | 0.392 |
| 164 | 1248BK08#2796                | 373 | 33.013 | 0.003296283 | 0.000043267 | 0.01  | 0.388 |
| 165 | 1248BK08#2876                | 337 | 33.808 | 0.028544539 | 0.032264571 | 1.13  | 0.762 |
| 166 | 1248BK08#2876                | 217 | 33.820 | 0.053855213 | 0.060531156 | 1.12  | 0.736 |
| 167 | 1248BK08#2876                | 361 | 33.820 | 0.011521085 | 0.008919789 | 0.77  | 0.342 |
| 168 | 1248BK08#2949                | 433 | 34.530 | 0.000092170 | 0.000181773 | 1.97  | 0.152 |
| 169 | 1248BK08#2983                | 387 | 34.866 | 0.000078919 | 0.000088661 | 1.12  | 0.861 |
| 170 | 1248BK08#2983                | 299 | 34.866 | 0.000131159 | 0.000278488 | 2.12  | 0.068 |
| 171 | 1248BK08#3000                | 289 | 35.048 | 0.000131256 | 0.000166220 | 1.27  | 0.642 |
| 172 | 1248BK08#3018                | 334 | 35.216 | 0.000096660 | 0.000208354 | 2.16  | 0.052 |

|     |                         |     |        |             |             |      |       |
|-----|-------------------------|-----|--------|-------------|-------------|------|-------|
| 173 | 1248BK08#3036           | 289 | 35.396 | 0.000056130 | 0.000085089 | 1.52 | 0.125 |
| 174 | 1248BK08#3036           | 334 | 35.396 | 0.000107966 | 0.000079443 | 0.74 | 0.559 |
| 175 | 1248BK08#3086           | 401 | 35.894 | 0.000070369 | 0.000055305 | 0.79 | 0.530 |
| 176 | 1248BK08#3086           | 437 | 35.894 | 0.000047697 | 0.000043476 | 0.91 | 0.778 |
| 177 | 1248BK08#3103           | 260 | 36.064 | 0.000092719 | 0.000175033 | 1.89 | 0.136 |
| 178 | 1248BK08#3131           | 446 | 36.344 | 0.000385985 | 0.000935327 | 2.42 | 0.154 |
| 179 | 1248BK08#3177           | 313 | 36.806 | 0.051933935 | 0.000170007 | 0.00 | 0.392 |
| 180 | 1248BK08#3192           | 387 | 36.957 | 0.000099031 | 0.000135269 | 1.37 | 0.638 |
| 181 | 1248BK08#3192           | 299 | 36.957 | 0.000111543 | 0.000173430 | 1.55 | 0.508 |
| 182 | 1248BK08#3192           | 471 | 36.957 | 0.004764947 | 0.000016714 | 0.00 | 0.391 |
| 183 | 1248BK08#3196           | 324 | 37.007 | 0.000032476 | 0.000063356 | 1.95 | 0.158 |
| 184 | 1248BK08#3223           | 287 | 37.271 | 0.000046235 | 0.000067659 | 1.46 | 0.058 |
| 185 | 1248BK08#3233           | 401 | 37.373 | 0.001164727 | 0.000035455 | 0.03 | 0.378 |
| 186 | 1248BK08#3359           | 491 | 38.628 | 0.000196346 | 0.000024919 | 0.13 | 0.313 |
| 187 | 1248BK08#3365           | 480 | 38.701 | 0.000103475 | 0.000057847 | 0.56 | 0.558 |
| 188 | 1248BK08#3365           | 307 | 38.701 | 0.000073540 | 0.000269926 | 3.67 | 0.071 |
| 189 | 1248BK08#3383           | 307 | 38.885 | 0.002109824 | 0.000178734 | 0.08 | 0.382 |
| 190 | 1248BK08#3385           | 295 | 38.914 | 0.001093536 | 0.000811934 | 0.74 | 0.382 |
| 191 | 1248BK08#3405           | 322 | 39.118 | 0.002222160 | 0.000103225 | 0.05 | 0.391 |
| 192 | 1248BK08#3412           | 473 | 39.178 | 0.000029267 | 0.000020603 | 0.70 | 0.389 |
| 193 | 1248BK08#3447           | 437 | 39.532 | 0.000258263 | 0.000451719 | 1.75 | 0.202 |
| 194 | 1248BK08#3456           | 361 | 39.623 | 0.010887861 | 0.007316546 | 0.67 | 0.595 |
| 195 | 1248BK08#3463           | 288 | 39.693 | 0.000870033 | 0.000072986 | 0.08 | 0.375 |
| 196 | 1248BK08#3468           | 437 | 39.743 | 0.000676038 | 0.000057163 | 0.08 | 0.380 |
| 197 | 1248BK08#3479           | 437 | 39.855 | 0.000082844 | 0.000104961 | 1.27 | 0.577 |
| 198 | 1248BK08#3581           | 539 | 40.856 | 0.001394112 | 0.000047819 | 0.03 | 0.395 |
| 199 | 1248BK08#3589           | 396 | 40.937 | 0.000396537 | 0.000018197 | 0.05 | 0.381 |
| 200 | 1248BK08#3589           | 361 | 40.937 | 0.001638359 | 0.006723351 | 4.10 | 0.077 |
| 201 | 1248BK08#3606           | 285 | 41.112 | 0.000046824 | 0.000084056 | 1.80 | 0.328 |
| 202 | 1248BK08#3627           | 296 | 41.303 | 0.000650008 | 0.000771814 | 1.19 | 0.643 |
| 203 | 1248BK08#3643           | 479 | 41.457 | 0.000681803 | 0.000025925 | 0.04 | 0.395 |
| 204 | 1248BK08#3773           | 446 | 42.694 | 0.001504386 | 0.000020959 | 0.01 | 0.389 |
| 205 | 1248BK08#3773           | 229 | 42.694 | 0.008923669 | 0.028054798 | 3.14 | 0.000 |
| 206 | 1248BK08#4003           | 259 | 44.854 | 0.001487681 | 0.000136539 | 0.09 | 0.018 |
| 207 | 1248BK08#4172#raffinose | 437 | 46.417 | 0.037393489 | 0.099246821 | 2.65 | 0.001 |
| 208 | 1248BK08#4172#raffinose | 451 | 46.417 | 0.016889433 | 0.051399243 | 3.04 | 0.008 |
| 209 | 1248BK08#4172#raffinose | 361 | 46.417 | 0.183454843 | 0.478492997 | 2.61 | 0.001 |
| 210 | 1248BK08#4180           | 437 | 46.509 | 0.037416118 | 0.099407726 | 2.66 | 0.001 |
| 211 | 1248BK08#4180           | 204 | 46.509 | 0.091509542 | 0.213127241 | 2.33 | 0.011 |
| 212 | 1248BK08#4180           | 217 | 46.509 | 0.118000940 | 0.198955003 | 1.69 | 0.136 |
| 213 | 1248BK08#4186           | 451 | 46.633 | 0.016950726 | 0.051449997 | 3.04 | 0.008 |
| 214 | 1250BK34#0703#dodecane  | 85  | 13.194 | 1.533761651 | 1.310144880 | 0.85 | 0.054 |
| 215 | 1263BK24#0843           | 174 | 14.907 | 1.612497803 | 1.319499668 | 0.82 | 0.381 |
| 216 | 1263BK24#0864#leucine 2 | 158 | 15.095 | 0.028471705 | 0.046173114 | 1.62 | 0.348 |
| 217 | 1263BK24#0864#leucine 2 | 232 | 15.095 | 0.000973861 | 0.001733445 | 1.78 | 0.292 |
| 218 | 1263BK24#0874#glycerol  | 117 | 15.184 | 0.116916357 | 0.072874957 | 0.62 | 0.258 |
| 219 | 1263BK24#0874#glycerol  | 205 | 15.184 | 0.100300834 | 0.128608979 | 1.28 | 0.577 |
| 220 | 1263BK24#0874#glycerol  | 218 | 15.184 | 0.021998115 | 0.038224085 | 1.74 | 0.296 |
| 221 | 1263BK24#0874#glycerol  | 293 | 15.184 | 1.056514354 | 0.002941527 | 0.00 | 0.182 |
| 222 | 1263BK24#0960           | 174 | 15.965 | 2.183166593 | 3.039637288 | 1.39 | 0.331 |
| 223 | 1263BK24#1089           | 156 | 17.123 | 0.005121823 | 0.001777989 | 0.35 | 0.478 |
| 224 | 1263BK24#1089           | 215 | 17.123 | 0.022974553 | 0.001036955 | 0.05 | 0.276 |
| 225 | 1263BK24#1215           | 219 | 18.264 | 0.004081949 | 0.005565917 | 1.36 | 0.357 |
| 226 | 1263BK24#1243           | 228 | 18.516 | 0.081010650 | 0.020299199 | 0.25 | 0.363 |
| 227 | 1263BK24#1446           | 188 | 20.361 | 0.006296027 | 0.003482244 | 0.55 | 0.366 |
| 228 | 1263BK24#1633           | 292 | 22.057 | 0.002449959 | 0.002994111 | 1.22 | 0.581 |
| 229 | 1263BK24#1633           | 117 | 22.057 | 0.001431629 | 0.001523350 | 1.06 | 0.852 |
| 230 | 1263BK24#1743           | 257 | 23.051 | 0.004762528 | 0.004360830 | 0.92 | 0.684 |
| 231 | 1263BK24#1785           | 150 | 23.426 | 0.001549628 | 0.001218454 | 0.79 | 0.769 |
| 232 | 1263BK24#1785           | 272 | 23.426 | 0.201113196 | 0.013359649 | 0.07 | 0.408 |
| 233 | 1263BK24#1861           | 303 | 24.109 | 0.004219960 | 0.004493293 | 1.06 | 0.851 |
| 234 | 1263BK24#1907           | 357 | 24.532 | 0.041131361 | 0.000376828 | 0.01 | 0.392 |
| 235 | 1263BK24#1910           | 416 | 24.554 | 0.002820466 | 0.005239286 | 1.86 | 0.451 |

|     |                               |     |        |             |             |        |       |
|-----|-------------------------------|-----|--------|-------------|-------------|--------|-------|
| 236 | 1263BK24#1994                 | 133 | 25.314 | 0.840488012 | 0.125593657 | 0.15   | 0.358 |
| 237 | 1263BK24#2004                 | 244 | 25.433 | 0.003144114 | 0.001981972 | 0.63   | 0.443 |
| 238 | 1263BK24#2026                 | 194 | 25.595 | 0.002990968 | 0.002948527 | 0.99   | 0.942 |
| 239 | 1263BK24#2047                 | 437 | 25.800 | 0.004218059 | 0.002496239 | 0.59   | 0.337 |
| 240 | 1263BK24#2063                 | 345 | 25.931 | 0.003256923 | 0.002300827 | 0.71   | 0.450 |
| 241 | 1263BK24#2063                 | 435 | 25.931 | 0.003110299 | 0.002233608 | 0.72   | 0.451 |
| 242 | 1263BK24#2154                 | 144 | 26.771 | 0.002098761 | 0.000856113 | 0.41   | 0.288 |
| 243 | 1263BK24#2154                 | 307 | 26.771 | 0.004312854 | 0.004308554 | 1.00   | 0.997 |
| 244 | 1263BK24#2269                 | 234 | 27.828 | 0.007258336 | 0.009342612 | 1.29   | 0.635 |
| 245 | 1263BK24#2295#tyrosine        | 218 | 28.072 | 0.154775284 | 0.333317727 | 2.15   | 0.040 |
| 246 | 1263BK24#2295#tyrosine        | 280 | 28.072 | 0.361420912 | 0.021020635 | 0.06   | 0.395 |
| 247 | 1263BK24#2476                 | 319 | 29.726 | 0.000250175 | 0.059909563 | 239.47 | 0.062 |
| 248 | 1263BK24#2679                 | 300 | 31.578 | 0.000082566 | 0.000078136 | 0.95   | 0.863 |
| 249 | 1263BK24#2679                 | 228 | 31.578 | 0.000396772 | 0.000119440 | 0.30   | 0.381 |
| 250 | 1263BK24#2697                 | 458 | 31.740 | 0.000047984 | 0.000031992 | 0.67   | 0.154 |
| 251 | 1263BK24#2727                 | 235 | 32.014 | 0.001391924 | 0.005081053 | 3.65   | 0.001 |
| 252 | 1263BK24#2772                 | 328 | 32.434 | 0.006670827 | 0.008090877 | 1.21   | 0.758 |
| 253 | 1263BK24#2814#spermidine      | 174 | 32.824 | 0.004232429 | 0.008098174 | 1.91   | 0.037 |
| 254 | 1263BK24#2814#spermidine      | 144 | 32.824 | 0.004065784 | 0.009140742 | 2.25   | 0.043 |
| 255 | 1263BK24#2994                 | 351 | 34.452 | 0.001468177 | 0.003030096 | 2.06   | 0.323 |
| 256 | 1263BK24#3026                 | 329 | 34.745 | 0.000551370 | 0.000064373 | 0.12   | 0.308 |
| 257 | 1263BK24#3026                 | 318 | 34.745 | 0.000347904 | 0.000457770 | 1.32   | 0.555 |
| 258 | 1263BK24#3069                 | 338 | 35.147 | 0.000114963 | 0.000205365 | 1.79   | 0.210 |
| 259 | 1263BK24#3069                 | 144 | 35.147 | 0.001157983 | 0.000412475 | 0.36   | 0.448 |
| 260 | 1263BK24#3137                 | 174 | 35.772 | 0.000324433 | 0.000934630 | 2.88   | 0.261 |
| 261 | 1263BK24#3155                 | 174 | 35.937 | 0.000196699 | 0.000526721 | 2.68   | 0.010 |
| 262 | 1263BK24#3155                 | 398 | 35.937 | 0.000038641 | 0.000033301 | 0.86   | 0.404 |
| 263 | 1263BK24#3171                 | 174 | 36.084 | 0.000118444 | 0.000571668 | 4.83   | 0.239 |
| 264 | 1263BK24#3472                 | 204 | 38.850 | 0.004354652 | 0.007791057 | 1.79   | 0.158 |
| 265 | 1263BK24#4315                 | 174 | 46.628 | 0.000239140 | 0.000266280 | 1.11   | 0.784 |
| 266 | 1263BK24#4440                 | 174 | 47.803 | 0.000125919 | 0.000169363 | 1.35   | 0.569 |
| 267 | 1263BK25#0632                 | 86  | 13.044 | 0.070433590 | 0.010910451 | 0.15   | 0.064 |
| 268 | 1263BK25#2215                 | 191 | 27.318 | 0.038797485 | 0.025882308 | 0.67   | 0.254 |
| 269 | 1263BK25#2215                 | 204 | 27.318 | 0.053507222 | 0.093149078 | 1.74   | 0.460 |
| 270 | 1263BK25#3658                 | 267 | 40.547 | 0.000215687 | 0.000135998 | 0.63   | 0.510 |
| 271 | 1263BK50#2309                 | 299 | 28.231 | 0.002493546 | 0.004209185 | 1.69   | 0.132 |
| 272 | 1263BK50#2309                 | 360 | 28.231 | 0.000375786 | 0.000752360 | 2.00   | 0.035 |
| 273 | 1263BK50#2309                 | 494 | 28.231 | 0.000841798 | 0.000106018 | 0.13   | 0.403 |
| 274 | 1267BK12#0266                 | 207 | 9.830  | 0.108291497 | 0.002213622 | 0.02   | 0.192 |
| 275 | 1267BK12#0266                 | 295 | 9.830  | 0.043287837 | 0.130288242 | 3.01   | 0.189 |
| 276 | 1267BK12#0289#lactic          | 117 | 10.035 | 0.003672833 | 0.000259600 | 0.07   | 0.171 |
| 277 | 1267BK12#0289#lactic          | 219 | 10.035 | 0.025536930 | 0.006127708 | 0.24   | 0.402 |
| 278 | 1267BK12#0326                 | 173 | 10.400 | 4.905528034 | 9.313418157 | 1.90   | 0.219 |
| 279 | 1267BK12#0362                 | 217 | 10.685 | 0.562798262 | 0.159117972 | 0.28   | 0.183 |
| 280 | 1267BK12#0362                 | 202 | 10.685 | 5.524467570 | 1.029355945 | 0.19   | 0.184 |
| 281 | 1267BK12#0403#alanine 2       | 116 | 11.052 | 0.034164092 | 0.074319888 | 2.18   | 0.079 |
| 282 | 1267BK12#0422#hydroxylamine   | 133 | 11.221 | 0.326693477 | 0.014751143 | 0.05   | 0.180 |
| 283 | 1267BK12#0422#hydroxylamine   | 249 | 11.221 | 0.429696729 | 0.600159330 | 1.40   | 0.358 |
| 284 | 1267BK12#0494#cy-siloxane 5   | 267 | 11.864 | 0.020223347 | 0.018964871 | 0.94   | 0.473 |
| 285 | 1267BK12#0503                 | 219 | 11.945 | 0.161016560 | 0.148329448 | 0.92   | 0.901 |
| 286 | 1267BK12#0503                 | 190 | 11.945 | 0.009642406 | 0.000060188 | 0.01   | 0.180 |
| 287 | 1267BK12#0516                 | 235 | 12.061 | 0.108420896 | 0.019671127 | 0.18   | 0.254 |
| 288 | 1267BK12#0531                 | 142 | 12.194 | 0.036280110 | 0.116264309 | 3.20   | 0.030 |
| 289 | 1267BK12#0531                 | 174 | 12.194 | 0.010721467 | 0.000637723 | 0.06   | 0.390 |
| 290 | 1267BK12#0616#me-phosphoric 3 | 241 | 12.963 | 0.051238435 | 0.033566031 | 0.66   | 0.346 |
| 291 | 1267BK12#0666#dodecane        | 85  | 13.402 | 1.537653609 | 1.308425053 | 0.85   | 0.048 |
| 292 | 1267BK12#0688                 | 233 | 13.600 | 0.020194292 | 0.001151709 | 0.06   | 0.197 |
| 293 | 1267BK12#0707#valine 2        | 144 | 13.770 | 0.109398119 | 0.192752717 | 1.76   | 0.194 |
| 294 | 1267BK12#0707#valine 2        | 218 | 13.770 | 0.015339968 | 0.030523335 | 1.99   | 0.178 |
| 295 | 1267BK12#0725                 | 156 | 13.931 | 0.092079002 | 0.005746810 | 0.06   | 0.184 |
| 296 | 1267BK12#0737#siloxane 5      | 281 | 14.039 | 0.010290346 | 0.013830190 | 1.34   | 0.477 |
| 297 | 1267BK12#0784                 | 248 | 14.459 | 0.012120668 | 0.018066911 | 1.49   | 0.452 |
| 298 | 1267BK12#0824#serine 2        | 116 | 14.818 | 1.211029731 | 2.077309942 | 1.72   | 0.001 |

|     |                             |     |        |             |             |      |       |
|-----|-----------------------------|-----|--------|-------------|-------------|------|-------|
| 299 | 1267BK12#0824#serine 2      | 132 | 14.818 | 0.595896148 | 2.231366538 | 3.74 | 0.011 |
| 300 | 1267BK12#0848               | 415 | 15.033 | 0.000248500 | 0.000116200 | 0.47 | 0.497 |
| 301 | 1267BK12#0848               | 261 | 15.033 | 0.008227414 | 0.000399580 | 0.05 | 0.115 |
| 302 | 1267BK12#0858#phosphoric 3  | 299 | 15.123 | 1.349000660 | 2.339022089 | 1.73 | 0.173 |
| 303 | 1267BK12#0858#phosphoric 3  | 314 | 15.123 | 0.222902540 | 0.500092085 | 2.24 | 0.068 |
| 304 | 1267BK12#0909#isoleucine 2  | 158 | 15.580 | 0.035807511 | 0.081187252 | 2.27 | 0.063 |
| 305 | 1267BK12#0909#isoleucine 2  | 218 | 15.580 | 0.053198578 | 0.014030280 | 0.26 | 0.243 |
| 306 | 1267BK12#0917#proline 2     | 216 | 15.643 | 0.012338342 | 0.000548165 | 0.04 | 0.178 |
| 307 | 1267BK12#0917#proline 2     | 142 | 15.643 | 0.195200421 | 0.018851694 | 0.10 | 0.192 |
| 308 | 1267BK12#0923#nicotinic     | 136 | 15.697 | 0.013601276 | 0.010195566 | 0.75 | 0.247 |
| 309 | 1267BK12#0923#nicotinic     | 180 | 15.697 | 0.008476149 | 0.015512309 | 1.83 | 0.220 |
| 310 | 1267BK12#0931#cy-siloxane 6 | 341 | 15.777 | 0.007647711 | 0.003585527 | 0.47 | 0.126 |
| 311 | 1267BK12#0945#maleic        | 245 | 15.903 | 0.021232219 | 0.004454392 | 0.21 | 0.358 |
| 312 | 1267BK12#0945#maleic        | 147 | 15.903 | 0.090597852 | 0.049063640 | 0.54 | 0.219 |
| 313 | 1267BK12#0970#d4-succinic   | 251 | 16.127 | 0.000114964 | 0.000091779 | 0.80 | 0.556 |
| 314 | 1267BK12#0970#d4-succinic   | 251 | 16.127 | 0.000115337 | 0.000064795 | 0.56 | 0.252 |
| 315 | 1267BK12#0970#succinic      | 147 | 16.127 | 0.228056488 | 0.197130194 | 0.86 | 0.348 |
| 316 | 1267BK12#0970#succinic      | 147 | 16.127 | 0.228056488 | 0.198777658 | 0.87 | 0.360 |
| 317 | 1267BK12#0970#succinic      | 247 | 16.127 | 0.024181695 | 0.020072544 | 0.83 | 0.312 |
| 318 | 1267BK12#0970#succinic      | 247 | 16.127 | 0.024195433 | 0.020072544 | 0.83 | 0.311 |
| 319 | 1267BK12#0970#succinic      | 247 | 16.127 | 0.067043010 | 0.020072544 | 0.30 | 0.344 |
| 320 | 1267BK12#0970#succinic      | 147 | 16.127 | 0.898843586 | 0.197130194 | 0.22 | 0.365 |
| 321 | 1267BK12#0998               | 261 | 16.379 | 0.048210345 | 0.000155873 | 0.00 | 0.391 |
| 322 | 1267BK12#0998               | 147 | 16.379 | 0.180016588 | 0.198777658 | 1.10 | 0.791 |
| 323 | 1267BK12#1009#glyceric      | 189 | 16.478 | 0.285911844 | 0.398759701 | 1.39 | 0.197 |
| 324 | 1267BK12#1009#glyceric      | 292 | 16.478 | 0.159524910 | 0.230101161 | 1.44 | 0.217 |
| 325 | 1267BK12#1059#fumaric       | 147 | 16.926 | 1.151814345 | 1.285131222 | 1.12 | 0.467 |
| 326 | 1267BK12#1059#fumaric       | 245 | 16.926 | 0.942858785 | 1.471936103 | 1.56 | 0.146 |
| 327 | 1267BK12#1067               | 188 | 16.998 | 0.382027935 | 0.236584222 | 0.62 | 0.418 |
| 328 | 1267BK12#1082#serine 3      | 218 | 17.133 | 0.531028370 | 0.834243364 | 1.57 | 0.018 |
| 329 | 1267BK12#1102               | 306 | 17.313 | 0.001703278 | 0.000978439 | 0.57 | 0.015 |
| 330 | 1267BK12#1102               | 233 | 17.313 | 0.001295771 | 0.001255956 | 0.97 | 0.895 |
| 331 | 1267BK12#1114               | 247 | 17.421 | 0.002733084 | 0.004794631 | 1.75 | 0.115 |
| 332 | 1267BK12#1143#threonine 3   | 219 | 17.681 | 0.101336710 | 0.148777361 | 1.47 | 0.173 |
| 333 | 1267BK12#1143#threonine 3   | 291 | 17.681 | 0.038581988 | 0.052804810 | 1.37 | 0.157 |
| 334 | 1267BK12#1164               | 191 | 17.869 | 0.022549799 | 0.001441503 | 0.06 | 0.386 |
| 335 | 1267BK12#1175               | 197 | 17.968 | 0.003072159 | 0.002717911 | 0.88 | 0.655 |
| 336 | 1267BK12#1195               | 174 | 18.149 | 0.013890283 | 0.026621627 | 1.92 | 0.048 |
| 337 | 1267BK12#1220               | 174 | 18.373 | 0.025273425 | 0.053010045 | 2.10 | 0.025 |
| 338 | 1267BK12#1237               | 160 | 18.526 | 0.167877506 | 0.204209691 | 1.22 | 0.587 |
| 339 | 1267BK12#1247               | 247 | 18.616 | 0.011477532 | 0.011617978 | 1.01 | 0.826 |
| 340 | 1267BK12#1270               | 172 | 18.832 | 0.003527462 | 0.000405744 | 0.12 | 0.400 |
| 341 | 1267BK12#1278               | 174 | 18.895 | 0.002291883 | 0.004365695 | 1.90 | 0.007 |
| 342 | 1267BK12#1278               | 168 | 18.895 | 0.001020713 | 0.002090067 | 2.05 | 0.019 |
| 343 | 1267BK12#1298               | 350 | 19.025 | 0.005508187 | 0.007528217 | 1.37 | 0.253 |
| 344 | 1267BK12#1303               | 174 | 19.120 | 0.036782986 | 0.064074247 | 1.74 | 0.090 |
| 345 | 1267BK12#1309               | 174 | 19.174 | 0.048614861 | 0.064074247 | 1.32 | 0.023 |
| 346 | 1267BK12#1334               | 281 | 19.454 | 0.013306781 | 0.012214510 | 0.92 | 0.322 |
| 347 | 1267BK12#1345               | 173 | 19.498 | 0.013766552 | 0.009270458 | 0.67 | 0.204 |
| 348 | 1267BK12#1345               | 103 | 19.498 | 0.017228573 | 0.020625013 | 1.20 | 0.604 |
| 349 | 1267BK12#1369               | 234 | 19.715 | 0.045597017 | 0.012339420 | 0.27 | 0.405 |
| 350 | 1267BK12#1390#malic         | 233 | 19.916 | 0.647574822 | 0.738371507 | 1.14 | 0.658 |
| 351 | 1267BK12#1390#malic         | 335 | 19.916 | 0.104413602 | 0.117453320 | 1.12 | 0.682 |
| 352 | 1267BK12#1406#pentadecane   | 85  | 20.057 | 2.332080400 | 2.085936377 | 0.89 | 0.132 |
| 353 | 1267BK12#1410               | 217 | 20.105 | 0.019827533 | 0.016718965 | 0.84 | 0.789 |
| 354 | 1267BK12#1410               | 293 | 20.105 | 0.178219408 | 0.001576146 | 0.01 | 0.391 |
| 355 | 1267BK12#1428               | 111 | 20.239 | 0.005441429 | 0.006361119 | 1.17 | 0.541 |
| 356 | 1267BK12#1428               | 275 | 20.239 | 0.005516129 | 0.001019414 | 0.18 | 0.378 |
| 357 | 1267BK12#1438               | 237 | 20.347 | 0.012462895 | 0.010948533 | 0.88 | 0.498 |
| 358 | 1267BK12#1457#aspartic 3    | 218 | 20.518 | 0.297301923 | 0.176050958 | 0.59 | 0.409 |
| 359 | 1267BK12#1457#aspartic 3    | 232 | 20.518 | 0.705454968 | 0.994868867 | 1.41 | 0.323 |
| 360 | 1267BK12#1457#aspartic 3    | 306 | 20.518 | 0.019117918 | 0.021865901 | 1.14 | 0.495 |
| 361 | 1267BK12#1457#pyroglutamic  | 156 | 20.518 | 4.095899000 | 5.326416353 | 1.30 | 0.434 |

|     |                               |     |        |             |             |      |         |
|-----|-------------------------------|-----|--------|-------------|-------------|------|---------|
| 362 | 1267BK12#1457#pyroglutamic    | 258 | 20.518 | 0.704729194 | 1.393321437 | 1.98 | 0.003   |
| 363 | 1267BK12#1457#pyroglutamic    | 230 | 20.518 | 0.544872955 | 1.257591302 | 2.31 | 0.008   |
| 364 | 1267BK12#1485                 | 84  | 20.771 | 0.200670498 | 0.295291999 | 1.47 | 0.286   |
| 365 | 1267BK12#1492                 | 263 | 20.834 | 0.209833592 | 0.143725102 | 0.68 | 0.213   |
| 366 | 1267BK12#1507                 | 292 | 20.970 | 0.171292339 | 0.178427068 | 1.04 | 0.676   |
| 367 | 1267BK12#1520                 | 249 | 21.069 | 0.016420971 | 0.000838969 | 0.05 | 0.386   |
| 368 | 1267BK12#1547#threonic        | 292 | 21.331 | 0.058994747 | 0.077598054 | 1.32 | 0.042   |
| 369 | 1267BK12#1547#threonic        | 220 | 21.331 | 0.041447178 | 0.046486945 | 1.12 | 0.388   |
| 370 | 1267BK12#1547#threonic        | 205 | 21.331 | 0.025899678 | 0.043246089 | 1.67 | 0.156   |
| 371 | 1267BK12#1569                 | 160 | 21.529 | 0.003437275 | 0.001395497 | 0.41 | 0.346   |
| 372 | 1267BK12#1587                 | 205 | 21.701 | 0.019450352 | 0.011889618 | 0.61 | 0.034   |
| 373 | 1267BK12#1609                 | 71  | 21.891 | 0.057424456 | 0.085963831 | 1.50 | 0.265   |
| 374 | 1267BK12#1609                 | 250 | 21.891 | 0.005752627 | 0.000520183 | 0.09 | 0.396   |
| 375 | 1267BK12#1627                 | 342 | 22.043 | 0.005091068 | 0.002359814 | 0.46 | 0.401   |
| 376 | 1267BK12#1631#asparagine 4    | 188 | 22.088 | 0.177943133 | 0.275175573 | 1.55 | 0.110   |
| 377 | 1267BK12#1631#asparagine 4    | 216 | 22.088 | 0.116808880 | 0.198534409 | 1.70 | 0.109   |
| 378 | 1267BK12#1631#asparagine 4    | 231 | 22.088 | 0.028097276 | 0.039004533 | 1.39 | 0.331   |
| 379 | 1267BK12#1674#glutamic 3      | 246 | 22.477 | 1.100301617 | 1.246157979 | 1.13 | 0.749   |
| 380 | 1267BK12#1674#glutamic 3      | 363 | 22.477 | 0.056681301 | 0.033767894 | 0.60 | 0.301   |
| 381 | 1267BK12#1680#phenylalanine 2 | 192 | 22.532 | 0.062717896 | 0.072588952 | 1.16 | 0.681   |
| 382 | 1267BK12#1680#phenylalanine 2 | 266 | 22.532 | 0.449951530 | 0.005642170 | 0.01 | 0.390   |
| 383 | 1267BK12#1733                 | 245 | 23.010 | 0.007473365 | 0.007651222 | 1.02 | 0.924   |
| 384 | 1267BK12#1751#xylose MX2      | 307 | 23.173 | 0.025658860 | 0.016992230 | 0.66 | 0.127   |
| 385 | 1267BK12#1751#xylose MX2      | 217 | 23.173 | 0.034731081 | 0.033157853 | 0.95 | 0.879   |
| 386 | 1267BK12#1765#arabinose MX2   | 307 | 23.299 | 0.006066642 | 0.010638927 | 1.75 | 0.348   |
| 387 | 1267BK12#1765#arabinose MX2   | 160 | 23.299 | 0.004178009 | 0.004998767 | 1.20 | 0.739   |
| 388 | 1267BK12#1779#asparagine 3    | 116 | 23.426 | 0.350169152 | 0.797910918 | 2.28 | 0.091   |
| 389 | 1267BK12#1779#asparagine 3    | 188 | 23.426 | 0.121078435 | 0.279854962 | 2.31 | 0.103   |
| 390 | 1267BK12#1794#ribose MX       | 307 | 23.570 | 0.017370717 | 0.015834084 | 0.91 | 0.783   |
| 391 | 1267BK12#1794#ribose MX       | 160 | 23.570 | 0.013406871 | 0.005801335 | 0.43 | 0.264   |
| 392 | 1267BK12#1809                 | 307 | 23.706 | 0.016676934 | 0.012888187 | 0.77 | 0.568   |
| 393 | 1267BK12#1824                 | 295 | 23.832 | 0.002418140 | 0.001116147 | 0.46 | 0.072   |
| 394 | 1267BK12#1824                 | 202 | 23.824 | 0.006298911 | 0.002950931 | 0.47 | 0.198   |
| 395 | 1267BK12#1827                 | 307 | 23.860 | 0.003157191 | 0.002503429 | 0.79 | 0.268   |
| 396 | 1267BK12#1837                 | 290 | 23.914 | 0.002031441 | 0.001323304 | 0.65 | 0.104   |
| 397 | 1267BK12#1846                 | 133 | 24.032 | 0.095435513 | 0.103972484 | 1.09 | 0.751   |
| 398 | 1267BK12#1849                 | 202 | 24.059 | 0.060241345 | 0.005074825 | 0.08 | 0.378   |
| 399 | 1267BK12#1859                 | 242 | 24.149 | 0.000715016 | 0.000970088 | 1.36 | 0.603   |
| 400 | 1267BK12#1859                 | 334 | 24.149 | 0.002010091 | 0.000997910 | 0.50 | 0.272   |
| 401 | 1267BK12#1870#rhamnose MX1    | 117 | 24.249 | 0.022811418 | 0.025418963 | 1.11 | 0.730   |
| 402 | 1267BK12#1870#rhamnose MX1    | 160 | 24.249 | 0.003969019 | 0.004434995 | 1.12 | 0.767   |
| 403 | 1267BK12#1877                 | 307 | 24.313 | 0.517392740 | 0.687696842 | 1.33 | 0.396   |
| 404 | 1267BK12#1885#ribitol         | 422 | 24.385 | 0.280377460 | 0.041186737 | 0.15 | 0.392   |
| 405 | 1267BK12#1885#ribitol         | 319 | 24.385 | 0.749767086 | 1.000238673 | 1.33 | 0.390   |
| 406 | 1267BK12#1885#ribitol TMS     | 319 | 24.395 | 1.000000000 | 1.000000000 | 1.00 | #DIV/0! |
| 407 | 1267BK12#1885#ribitol TMS     | 319 | 24.395 | 0.999430797 | 1.000238673 | 1.00 | 0.061   |
| 408 | 1267BK12#1885#ribitol TMS     | 307 | 24.395 | 0.691694724 | 0.687651216 | 0.99 | 0.504   |
| 409 | 1267BK12#1885#ribitol TMS     | 307 | 24.395 | 0.691694724 | 0.687696842 | 0.99 | 0.508   |
| 410 | 1267BK12#1885#ribitol TMS     | 422 | 24.395 | 0.041219456 | 0.041191608 | 1.00 | 0.984   |
| 411 | 1267BK12#1885#ribitol TMS     | 422 | 24.395 | 0.041219456 | 0.041186737 | 1.00 | 0.981   |
| 412 | 1267BK12#1896#putrescine 4    | 174 | 24.487 | 1.218619212 | 4.523549706 | 3.71 | 0.001   |
| 413 | 1267BK12#1903                 | 416 | 24.559 | 0.000068493 | 0.000056965 | 0.83 | 0.722   |
| 414 | 1267BK12#1908                 | 133 | 24.595 | 0.068691648 | 0.065599279 | 0.95 | 0.900   |
| 415 | 1267BK12#1916                 | 205 | 24.676 | 0.049575351 | 0.010273468 | 0.21 | 0.053   |
| 416 | 1267BK12#1918                 | 392 | 24.685 | 0.006865501 | 0.004921095 | 0.72 | 0.118   |
| 417 | 1267BK12#1918                 | 392 | 24.685 | 0.016211223 | 0.006850209 | 0.42 | 0.303   |
| 418 | 1267BK12#1925                 | 292 | 24.749 | 0.028815682 | 0.032279138 | 1.12 | 0.759   |
| 419 | 1267BK12#1925                 | 465 | 24.749 | 0.001574785 | 0.000015442 | 0.01 | 0.386   |
| 420 | 1267BK12#1940                 | 292 | 24.884 | 0.036519207 | 0.032279138 | 0.88 | 0.386   |
| 421 | 1267BK12#1940                 | 333 | 24.884 | 0.024217074 | 0.026755060 | 1.10 | 0.789   |
| 422 | 1267BK12#1946                 | 133 | 24.948 | 0.028093792 | 0.032174582 | 1.15 | 0.714   |
| 423 | 1267BK12#1953                 | 346 | 25.012 | 0.050243163 | 0.000454021 | 0.01 | 0.386   |
| 424 | 1267BK12#1953                 | 133 | 25.012 | 0.164679237 | 0.141202649 | 0.86 | 0.650   |



|     |                               |     |        |             |             |       |       |
|-----|-------------------------------|-----|--------|-------------|-------------|-------|-------|
| 425 | 1267BK12#1961                 | 422 | 25.079 | 0.024998901 | 0.014311716 | 0.57  | 0.318 |
| 426 | 1267BK12#1961                 | 116 | 25.079 | 0.062669322 | 0.045595287 | 0.73  | 0.052 |
| 427 | 1267BK12#1967                 | 276 | 25.124 | 0.029217584 | 0.016696948 | 0.57  | 0.419 |
| 428 | 1267BK12#1967                 | 392 | 25.124 | 0.065020197 | 0.075863762 | 1.17  | 0.539 |
| 429 | 1267BK12#1967                 | 302 | 25.124 | 0.014811611 | 0.023014041 | 1.55  | 0.142 |
| 430 | 1267BK12#1970                 | 319 | 25.166 | 0.006745352 | 0.010263907 | 1.52  | 0.202 |
| 431 | 1267BK12#1970                 | 275 | 25.166 | 0.017653493 | 0.000448715 | 0.03  | 0.391 |
| 432 | 1267BK12#1970                 | 392 | 25.166 | 0.063887360 | 0.075863762 | 1.19  | 0.526 |
| 433 | 1267BK12#1997                 | 392 | 25.401 | 0.047473443 | 0.003971632 | 0.08  | 0.381 |
| 434 | 1267BK12#2001                 | 436 | 25.437 | 0.001406904 | 0.000990032 | 0.70  | 0.685 |
| 435 | 1267BK12#2008                 | 292 | 25.501 | 0.000306518 | 0.024351082 | 79.44 | 0.394 |
| 436 | 1267BK12#2019                 | 312 | 25.595 | 0.028381647 | 0.005090326 | 0.18  | 0.410 |
| 437 | 1267BK12#2025                 | 392 | 25.655 | 0.014345448 | 0.023341615 | 1.63  | 0.277 |
| 438 | 1267BK12#2025                 | 249 | 25.655 | 0.001339266 | 0.000370217 | 0.28  | 0.145 |
| 439 | 1267BK12#2030                 | 392 | 25.709 | 0.021036505 | 0.023341615 | 1.11  | 0.728 |
| 440 | 1267BK12#2030                 | 317 | 25.709 | 0.008714654 | 0.002106167 | 0.24  | 0.402 |
| 441 | 1267BK12#2038                 | 292 | 25.782 | 0.006900837 | 0.008585937 | 1.24  | 0.073 |
| 442 | 1267BK12#2038                 | 333 | 25.782 | 0.013222954 | 0.009104446 | 0.69  | 0.496 |
| 443 | 1267BK12#2053                 | 244 | 25.909 | 0.007387320 | 0.004265746 | 0.58  | 0.438 |
| 444 | 1267BK12#2062#shikimic        | 204 | 25.990 | 0.104447269 | 0.109397585 | 1.05  | 0.951 |
| 445 | 1267BK12#2062#shikimic        | 462 | 25.990 | 0.000922730 | 0.000498252 | 0.54  | 0.391 |
| 446 | 1267BK12#2062#shikimic        | 372 | 25.990 | 0.000454679 | 0.001303735 | 2.87  | 0.092 |
| 447 | 1267BK12#2074#citric          | 375 | 26.100 | 0.219644885 | 0.131694998 | 0.60  | 0.495 |
| 448 | 1267BK12#2074#citric          | 273 | 26.100 | 0.776302011 | 0.736814833 | 0.95  | 0.845 |
| 449 | 1267BK12#2081#isocitric       | 319 | 26.172 | 0.012032470 | 0.007949710 | 0.66  | 0.345 |
| 450 | 1267BK12#2087                 | 304 | 26.208 | 0.011894892 | 0.006536461 | 0.55  | 0.297 |
| 451 | 1267BK12#2114                 | 316 | 26.461 | 0.002374034 | 0.026590028 | 11.20 | 0.000 |
| 452 | 1267BK12#2114                 | 206 | 26.461 | 0.005938761 | 0.001640206 | 0.28  | 0.028 |
| 453 | 1267BK12#2124#dehydroascorbic | 316 | 26.552 | 0.043729078 | 0.026590028 | 0.61  | 0.255 |
| 454 | 1267BK12#2124#dehydroascorbic | 173 | 26.552 | 0.079083563 | 0.071243881 | 0.90  | 0.480 |
| 455 | 1267BK12#2124#dehydroascorbic | 157 | 26.552 | 0.051855373 | 0.057213068 | 1.10  | 0.778 |
| 456 | 1267BK12#2145#quinic          | 255 | 26.743 | 0.001242131 | 0.001269670 | 1.02  | 0.962 |
| 457 | 1267BK12#2145#quinic          | 345 | 26.743 | 0.007759316 | 0.001606958 | 0.21  | 0.461 |
| 458 | 1267BK12#2151                 | 260 | 26.798 | 0.003292392 | 0.003112861 | 0.95  | 0.862 |
| 459 | 1267BK12#2162                 | 149 | 26.924 | 0.074511711 | 0.126413982 | 1.70  | 0.187 |
| 460 | 1267BK12#2171#fru MX1         | 307 | 26.980 | 4.972523200 | 5.793940884 | 1.17  | 0.655 |
| 461 | 1267BK12#2171#fru MX1         | 569 | 26.980 | 0.065359762 | 0.042173012 | 0.65  | 0.261 |
| 462 | 1267BK12#2177                 | 389 | 27.026 | 0.009599675 | 0.002234321 | 0.23  | 0.346 |
| 463 | 1267BK12#2177                 | 157 | 27.026 | 1.189145666 | 0.273033778 | 0.23  | 0.487 |
| 464 | 1267BK12#2181                 | 307 | 27.082 | 2.960210744 | 5.500089216 | 1.86  | 0.238 |
| 465 | 1267BK12#2181                 | 245 | 27.082 | 0.011806447 | 0.027116356 | 2.30  | 0.363 |
| 466 | 1267BK12#2190#fru MX2         | 307 | 27.154 | 3.930347848 | 4.588236525 | 1.17  | 0.652 |
| 467 | 1267BK12#2190#fru MX2         | 569 | 27.154 | 0.044512150 | 0.048218111 | 1.08  | 0.702 |
| 468 | 1267BK12#2196#man MX          | 160 | 27.208 | 0.032246161 | 0.034987121 | 1.09  | 0.776 |
| 469 | 1267BK12#2196#man MX          | 319 | 27.208 | 0.992102017 | 0.086374311 | 0.09  | 0.400 |
| 470 | 1267BK12#2216#glc MX1         | 160 | 27.390 | 2.641443197 | 2.468408163 | 0.93  | 0.891 |
| 471 | 1267BK12#2216#glc MX1         | 466 | 27.390 | 0.028606998 | 0.037700479 | 1.32  | 0.396 |
| 472 | 1267BK12#2220#nonadecane      | 85  | 27.429 | 3.451920085 | 2.714772556 | 0.79  | 0.017 |
| 473 | 1267BK12#2237#tyramine        | 174 | 27.591 | 0.132542244 | 0.125430432 | 0.95  | 0.911 |
| 474 | 1267BK12#2237#tyramine        | 338 | 27.591 | 0.000382712 | 0.000623305 | 1.63  | 0.218 |
| 475 | 1267BK12#2248#glc MX2         | 160 | 27.691 | 0.742254631 | 0.757441804 | 1.02  | 0.851 |
| 476 | 1267BK12#2248#glc MX2         | 319 | 27.691 | 1.078219918 | 1.358523584 | 1.26  | 0.311 |
| 477 | 1267BK12#2259                 | 242 | 27.791 | 0.001973916 | 0.003967344 | 2.01  | 0.470 |
| 478 | 1267BK12#2259                 | 389 | 27.791 | 0.026424646 | 0.003858173 | 0.15  | 0.443 |
| 479 | 1267BK12#2265                 | 244 | 27.846 | 0.003913720 | 0.005708634 | 1.46  | 0.192 |
| 480 | 1267BK12#2270                 | 362 | 27.891 | 0.003795075 | 0.002047614 | 0.54  | 0.176 |
| 481 | 1267BK12#2285                 | 229 | 28.027 | 0.001620947 | 0.001514834 | 0.93  | 0.885 |
| 482 | 1267BK12#2285                 | 330 | 28.027 | 0.001924487 | 0.000597120 | 0.31  | 0.286 |
| 483 | 1267BK12#2290#tyrosine        | 354 | 28.073 | 0.046005702 | 0.005150113 | 0.11  | 0.397 |
| 484 | 1267BK12#2298                 | 404 | 28.137 | 0.007800952 | 0.002151612 | 0.28  | 0.448 |
| 485 | 1267BK12#2298                 | 244 | 28.137 | 0.018645625 | 0.032283815 | 1.73  | 0.138 |
| 486 | 1267BK12#2309#L-ascorbic      | 332 | 28.246 | 0.001601921 | 0.001915755 | 1.20  | 0.610 |
| 487 | 1267BK12#2309#L-ascorbic      | 449 | 28.246 | 0.007748383 | 0.022575817 | 2.91  | 0.252 |

|     |                              |     |        |             |             |      |       |
|-----|------------------------------|-----|--------|-------------|-------------|------|-------|
| 488 | 1267BK12#2309#L-ascorbic     | 464 | 28.246 | 0.001970570 | 0.002921038 | 1.48 | 0.117 |
| 489 | 1267BK12#2320#D-isoascorbic  | 332 | 28.348 | 0.001401401 | 0.001758044 | 1.25 | 0.534 |
| 490 | 1267BK12#2320#D-isoascorbic  | 332 | 28.348 | 0.001401401 | 0.001758044 | 1.25 | 0.534 |
| 491 | 1267BK12#2320#D-isoascorbic  | 449 | 28.348 | 0.017604660 | 0.029747723 | 1.69 | 0.190 |
| 492 | 1267BK12#2320#D-isoascorbic  | 449 | 28.348 | 0.017604660 | 0.029747723 | 1.69 | 0.190 |
| 493 | 1267BK12#2320#D-isoascorbic  | 464 | 28.348 | 0.001923349 | 0.000361224 | 0.19 | 0.097 |
| 494 | 1267BK12#2320#D-isoascorbic  | 464 | 28.348 | 0.001923349 | 0.000361224 | 0.19 | 0.097 |
| 495 | 1267BK12#2320#D-isoascorbic  | 332 | 28.348 | 0.001522381 | 0.001758044 | 1.15 | 0.665 |
| 496 | 1267BK12#2320#D-isoascorbic  | 464 | 28.348 | 0.001637603 | 0.000361224 | 0.22 | 0.199 |
| 497 | 1267BK12#2325                | 299 | 28.396 | 0.010497562 | 0.015143876 | 1.44 | 0.251 |
| 498 | 1267BK12#2336                | 420 | 28.496 | 0.000974558 | 0.000339606 | 0.35 | 0.082 |
| 499 | 1267BK12#2336                | 330 | 28.496 | 0.000560945 | 0.000201515 | 0.36 | 0.072 |
| 500 | 1267BK12#2341                | 420 | 28.550 | 0.000785079 | 0.000339606 | 0.43 | 0.240 |
| 501 | 1267BK12#2354                | 394 | 28.668 | 0.000127353 | 0.000053235 | 0.42 | 0.080 |
| 502 | 1267BK12#2364#c-caffeic      | 219 | 28.750 | 0.000616225 | 0.000361677 | 0.59 | 0.505 |
| 503 | 1267BK12#2364#c-caffeic      | 396 | 28.750 | 0.000091395 | 0.000072048 | 0.79 | 0.574 |
| 504 | 1267BK12#2364#c-caffeic      | 381 | 28.750 | 0.000091960 | 0.000076748 | 0.83 | 0.573 |
| 505 | 1267BK12#2370                | 204 | 28.806 | 0.047460680 | 0.054735034 | 1.15 | 0.783 |
| 506 | 1267BK12#2384                | 332 | 28.942 | 0.001351861 | 0.001366743 | 1.01 | 0.983 |
| 507 | 1267BK12#2384                | 190 | 28.942 | 0.006616168 | 0.002639092 | 0.40 | 0.229 |
| 508 | 1267BK12#2396                | 447 | 29.051 | 0.007475853 | 0.006683907 | 0.89 | 0.776 |
| 509 | 1267BK12#2401                | 190 | 29.079 | 0.001626983 | 0.001761988 | 1.08 | 0.884 |
| 510 | 1267BK12#2401                | 230 | 29.079 | 0.001718116 | 0.000442348 | 0.26 | 0.423 |
| 511 | 1267BK12#2412                | 206 | 29.188 | 0.006793444 | 0.006494740 | 0.96 | 0.746 |
| 512 | 1267BK12#2412                | 116 | 29.188 | 0.004497967 | 0.004780523 | 1.06 | 0.835 |
| 513 | 1267BK12#2436                | 174 | 29.406 | 0.037902133 | 0.056658639 | 1.49 | 0.286 |
| 514 | 1267BK12#2455                | 319 | 29.578 | 0.054976981 | 0.079577042 | 1.45 | 0.298 |
| 515 | 1267BK12#2463                | 373 | 29.652 | 0.012254778 | 0.000382139 | 0.03 | 0.389 |
| 516 | 1267BK12#2476#16:0           | 313 | 29.770 | 0.044204802 | 0.056241778 | 1.27 | 0.296 |
| 517 | 1267BK12#2483                | 360 | 29.833 | 0.019236460 | 0.000615016 | 0.03 | 0.394 |
| 518 | 1267BK12#2512                | 484 | 30.097 | 0.000488740 | 0.000084028 | 0.17 | 0.430 |
| 519 | 1267BK12#2527#dopamine       | 174 | 30.234 | 0.000691317 | 0.001460794 | 2.11 | 0.285 |
| 520 | 1267BK12#2527#dopamine       | 426 | 30.234 | 0.000037873 | 0.000024372 | 0.64 | 0.182 |
| 521 | 1267BK12#2537                | 288 | 30.326 | 0.000565899 | 0.000625998 | 1.11 | 0.699 |
| 522 | 1267BK12#2548#myo-ino        | 507 | 30.426 | 0.153834633 | 0.024180639 | 0.16 | 0.396 |
| 523 | 1267BK12#2548#myo-ino        | 305 | 30.426 | 0.546821172 | 0.773500500 | 1.41 | 0.322 |
| 524 | 1267BK12#2559                | 262 | 30.527 | 0.000672889 | 0.000548040 | 0.81 | 0.480 |
| 525 | 1267BK12#2559                | 205 | 30.527 | 0.043137593 | 0.072924617 | 1.69 | 0.300 |
| 526 | 1267BK12#2560#t-ferulic      | 338 | 30.536 | 0.001163299 | 0.001053168 | 0.91 | 0.708 |
| 527 | 1267BK12#2560#t-ferulic      | 249 | 30.536 | 0.000670201 | 0.000653734 | 0.98 | 0.850 |
| 528 | 1267BK12#2560#t-ferulic      | 323 | 30.536 | 0.000868380 | 0.000717132 | 0.83 | 0.312 |
| 529 | 1267BK12#2584                | 373 | 30.756 | 0.001336613 | 0.002764884 | 2.07 | 0.332 |
| 530 | 1267BK12#2589                | 319 | 30.784 | 0.043206868 | 0.040777883 | 0.94 | 0.888 |
| 531 | 1267BK12#2609                | 319 | 30.975 | 0.008128493 | 0.012040246 | 1.48 | 0.322 |
| 532 | 1267BK12#2620                | 352 | 31.102 | 0.003109082 | 0.000314586 | 0.10 | 0.331 |
| 533 | 1267BK12#2633#t-caffeic      | 396 | 31.194 | 0.000521240 | 0.000372082 | 0.71 | 0.478 |
| 534 | 1267BK12#2633#t-caffeic      | 219 | 31.194 | 0.000950999 | 0.001115776 | 1.17 | 0.668 |
| 535 | 1267BK12#2633#t-caffeic      | 381 | 31.194 | 0.002695633 | 0.000100551 | 0.04 | 0.393 |
| 536 | 1267BK12#2639                | 319 | 31.258 | 0.008622428 | 0.003477968 | 0.40 | 0.329 |
| 537 | 1267BK12#2660#noradrenalin 5 | 174 | 31.449 | 0.000580459 | 0.001847163 | 3.18 | 0.071 |
| 538 | 1267BK12#2685                | 364 | 31.686 | 0.000676242 | 0.000474361 | 0.70 | 0.012 |
| 539 | 1267BK12#2685                | 230 | 31.686 | 0.000682343 | 0.000668445 | 0.98 | 0.955 |
| 540 | 1267BK12#2715                | 249 | 31.950 | 0.030989711 | 0.041465114 | 1.34 | 0.683 |
| 541 | 1267BK12#2715                | 204 | 31.950 | 0.069711136 | 0.451306272 | 6.47 | 0.000 |
| 542 | 1267BK12#2723                | 218 | 32.024 | 0.003463843 | 0.018904916 | 5.46 | 0.000 |
| 543 | 1267BK12#2723                | 235 | 32.024 | 0.003547136 | 0.005081053 | 1.43 | 0.446 |
| 544 | 1267BK12#2734#docosane       | 85  | 32.126 | 3.133778053 | 2.663952196 | 0.85 | 0.057 |
| 545 | 1267BK12#2738                | 357 | 32.166 | 0.000089363 | 0.000548898 | 6.14 | 0.092 |
| 546 | 1267BK12#2738                | 445 | 32.166 | 0.001058173 | 0.000176395 | 0.17 | 0.449 |
| 547 | 1267BK12#2742#tryptophan 2   | 202 | 32.204 | 0.007626627 | 0.021320479 | 2.80 | 0.010 |
| 548 | 1267BK12#2742#tryptophan 2   | 391 | 32.204 | 0.000393953 | 0.000788347 | 2.00 | 0.002 |
| 549 | 1267BK12#2742#tryptophan 2   | 278 | 32.204 | 0.000489168 | 0.001277262 | 2.61 | 0.001 |
| 550 | 1267BK12#2758#tryptophan 3   | 202 | 32.350 | 0.042697558 | 0.241992059 | 5.67 | 0.001 |

|     |                             |     |        |             |             |       |       |
|-----|-----------------------------|-----|--------|-------------|-------------|-------|-------|
| 551 | 1267BK12#2758#tryptophan 3  | 291 | 32.350 | 0.004628605 | 0.024833977 | 5.37  | 0.001 |
| 552 | 1267BK12#2758#tryptophan 3  | 200 | 32.350 | 0.003528661 | 0.007086318 | 2.01  | 0.096 |
| 553 | 1267BK12#2801#18:0          | 341 | 32.742 | 0.040054854 | 0.052101615 | 1.30  | 0.444 |
| 554 | 1267BK12#2809#t-sinapic     | 368 | 32.815 | 0.066537339 | 0.061467105 | 0.92  | 0.629 |
| 555 | 1267BK12#2809#t-sinapic     | 338 | 32.815 | 0.058507765 | 0.063093569 | 1.08  | 0.725 |
| 556 | 1267BK12#2809#t-sinapic     | 353 | 32.815 | 0.025578238 | 0.032958073 | 1.29  | 0.509 |
| 557 | 1267BK12#2822               | 159 | 32.933 | 0.011871699 | 0.012762266 | 1.08  | 0.809 |
| 558 | 1267BK12#2822               | 286 | 32.933 | 0.001673830 | 0.001839839 | 1.10  | 0.744 |
| 559 | 1267BK12#2859               | 290 | 33.272 | 0.015772331 | 0.022999144 | 1.46  | 0.151 |
| 560 | 1267BK12#2859               | 319 | 33.272 | 0.005876300 | 0.009476935 | 1.61  | 0.209 |
| 561 | 1267BK12#2881               | 263 | 33.472 | 0.000415629 | 0.000387877 | 0.93  | 0.887 |
| 562 | 1267BK12#2881               | 259 | 33.472 | 0.004464872 | 0.000064796 | 0.01  | 0.387 |
| 563 | 1267BK12#2907               | 328 | 33.719 | 0.007830349 | 0.006716495 | 0.86  | 0.708 |
| 564 | 1267BK12#2908#fru-6-P MX    | 315 | 33.718 | 0.001242129 | 0.003151150 | 2.54  | 0.198 |
| 565 | 1267BK12#2908#fru-6-P MX    | 260 | 33.718 | 0.000325501 | 0.000241582 | 0.74  | 0.507 |
| 566 | 1267BK12#2921               | 173 | 33.820 | 0.015749585 | 0.001120814 | 0.07  | 0.385 |
| 567 | 1267BK12#2926#glc-6-P MX1   | 387 | 33.892 | 0.004137425 | 0.007501585 | 1.81  | 0.385 |
| 568 | 1267BK12#2944               | 277 | 34.057 | 0.000845764 | 0.000097214 | 0.11  | 0.361 |
| 569 | 1267BK12#2944               | 204 | 34.057 | 0.005834471 | 0.003032232 | 0.52  | 0.388 |
| 570 | 1267BK12#2953#glc-6-P MX2   | 387 | 34.131 | 0.001314515 | 0.001468894 | 1.12  | 0.857 |
| 571 | 1267BK12#2958               | 417 | 34.177 | 0.000768482 | 0.000921755 | 1.20  | 0.612 |
| 572 | 1267BK12#2958               | 489 | 34.177 | 0.000993415 | 0.000379167 | 0.38  | 0.426 |
| 573 | 1267BK12#2975               | 331 | 34.332 | 0.002667214 | 0.005227129 | 1.96  | 0.005 |
| 574 | 1267BK12#2975               | 204 | 34.332 | 0.002029094 | 0.008842734 | 4.36  | 0.037 |
| 575 | 1267BK12#2975               | 172 | 34.332 | 0.001274263 | 0.000894505 | 0.70  | 0.369 |
| 576 | 1267BK12#2980               | 331 | 34.379 | 0.005169575 | 0.005227129 | 1.01  | 0.962 |
| 577 | 1267BK12#2980               | 262 | 34.379 | 0.002887988 | 0.002740162 | 0.95  | 0.770 |
| 578 | 1267BK12#2980               | 421 | 34.379 | 0.002929841 | 0.002202651 | 0.75  | 0.502 |
| 579 | 1267BK12#3007               | 351 | 34.626 | 0.019836219 | 0.000878084 | 0.04  | 0.401 |
| 580 | 1267BK12#3007               | 204 | 34.626 | 0.073453831 | 0.033914481 | 0.46  | 0.240 |
| 581 | 1267BK12#3014               | 292 | 34.690 | 0.045423275 | 0.016973250 | 0.37  | 0.150 |
| 582 | 1267BK12#3014               | 204 | 34.690 | 0.080749312 | 0.060631032 | 0.75  | 0.542 |
| 583 | 1267BK12#3034               | 91  | 34.872 | 0.002777340 | 0.000832326 | 0.30  | 0.046 |
| 584 | 1267BK12#3034               | 204 | 34.872 | 0.003475514 | 0.061748044 | 17.77 | 0.063 |
| 585 | 1267BK12#3058               | 356 | 35.138 | 0.001843289 | 0.001902195 | 1.03  | 0.952 |
| 586 | 1267BK12#3058               | 262 | 35.138 | 0.001809559 | 0.001034230 | 0.57  | 0.255 |
| 587 | 1267BK12#3061#myo-ino-2-P 1 | 318 | 35.131 | 0.002119435 | 0.003359978 | 1.59  | 0.097 |
| 588 | 1267BK12#3081               | 159 | 35.302 | 0.000147428 | 0.001082531 | 7.34  | 0.000 |
| 589 | 1267BK12#3097               | 245 | 35.458 | 0.000836623 | 0.001173297 | 1.40  | 0.061 |
| 590 | 1267BK12#3097               | 360 | 35.458 | 0.000478561 | 0.000769393 | 1.61  | 0.211 |
| 591 | 1267BK12#3118               | 430 | 35.642 | 0.001241585 | 0.001665473 | 1.34  | 0.340 |
| 592 | 1267BK12#3118               | 360 | 35.642 | 0.002723423 | 0.001545509 | 0.57  | 0.511 |
| 593 | 1267BK12#3179               | 204 | 36.200 | 0.009947955 | 0.021901004 | 2.20  | 0.038 |
| 594 | 1267BK12#3179               | 247 | 36.200 | 0.000197923 | 0.000259947 | 1.31  | 0.576 |
| 595 | 1267BK12#3189               | 105 | 36.292 | 0.001069595 | 0.001090345 | 1.02  | 0.959 |
| 596 | 1267BK12#3189               | 356 | 36.292 | 0.001274864 | 0.001367552 | 1.07  | 0.881 |
| 597 | 1267BK12#3189               | 223 | 36.292 | 0.000299706 | 0.000390580 | 1.30  | 0.507 |
| 598 | 1267BK12#3203               | 321 | 36.419 | 0.075274410 | 0.038774633 | 0.52  | 0.471 |
| 599 | 1267BK12#3203               | 204 | 36.419 | 0.144945150 | 0.233613364 | 1.61  | 0.171 |
| 600 | 1267BK12#3203               | 361 | 36.419 | 0.009220366 | 0.016236420 | 1.76  | 0.136 |
| 601 | 1267BK12#3258               | 219 | 36.923 | 0.012186371 | 0.010298456 | 0.85  | 0.705 |
| 602 | 1267BK12#3278               | 290 | 37.107 | 0.000091086 | 0.000200632 | 2.20  | 0.026 |
| 603 | 1267BK12#3283               | 304 | 37.144 | 0.000106553 | 0.000063522 | 0.60  | 0.431 |
| 604 | 1267BK12#3283               | 175 | 37.144 | 0.000095826 | 0.000272143 | 2.84  | 0.175 |
| 605 | 1267BK12#3302               | 361 | 37.336 | 0.003656941 | 0.004943636 | 1.35  | 0.410 |
| 606 | 1267BK12#3302               | 267 | 37.336 | 0.000538499 | 0.000335665 | 0.62  | 0.342 |
| 607 | 1267BK12#3317               | 254 | 37.465 | 0.000182982 | 0.000373107 | 2.04  | 0.167 |
| 608 | 1267BK12#3323               | 535 | 37.520 | 0.000175786 | 0.000219324 | 1.25  | 0.655 |
| 609 | 1267BK12#3382#sucrose       | 437 | 38.090 | 0.435879183 | 0.446249474 | 1.02  | 0.949 |
| 610 | 1267BK12#3386#sucrose       | 451 | 38.099 | 0.334671499 | 0.178835654 | 0.53  | 0.235 |
| 611 | 1267BK12#3391               | 423 | 38.169 | 0.072172234 | 0.004578381 | 0.06  | 0.378 |
| 612 | 1267BK12#3431               | 204 | 38.510 | 0.022683419 | 0.039434020 | 1.74  | 0.003 |
| 613 | 1267BK12#3467               | 450 | 38.859 | 0.002776694 | 0.000135627 | 0.05  | 0.404 |

|     |                                |     |        |             |             |      |       |
|-----|--------------------------------|-----|--------|-------------|-------------|------|-------|
| 614 | 1267BK12#3487                  | 204 | 39.034 | 0.011611188 | 0.010212952 | 0.88 | 0.352 |
| 615 | 1267BK12#3515#maltose MX1      | 204 | 39.300 | 0.021981185 | 0.011416432 | 0.52 | 0.267 |
| 616 | 1267BK12#3515#maltose MX1      | 160 | 39.300 | 0.002098732 | 0.001352235 | 0.64 | 0.406 |
| 617 | 1267BK12#3522#trehalose        | 191 | 39.356 | 0.013428924 | 0.005414362 | 0.40 | 0.007 |
| 618 | 1267BK12#3559                  | 193 | 39.695 | 0.001358616 | 0.002074303 | 1.53 | 0.310 |
| 619 | 1267BK12#3586                  | 105 | 39.944 | 0.123505934 | 0.098291605 | 0.80 | 0.142 |
| 620 | 1267BK12#3586                  | 179 | 39.944 | 0.119456733 | 0.142171266 | 1.19 | 0.622 |
| 621 | 1267BK12#3594#octacosane       | 85  | 40.018 | 2.707432619 | 2.318165637 | 0.86 | 0.043 |
| 622 | 1267BK12#3622                  | 277 | 40.279 | 0.026159948 | 0.000056451 | 0.00 | 0.390 |
| 623 | 1267BK12#3633                  | 450 | 40.380 | 0.000116516 | 0.000160440 | 1.38 | 0.326 |
| 624 | 1267BK12#3668                  | 345 | 40.730 | 0.000141225 | 0.000185021 | 1.31 | 0.455 |
| 625 | 1267BK12#3668                  | 175 | 40.730 | 0.000142828 | 0.000151805 | 1.06 | 0.888 |
| 626 | 1267BK12#3674                  | 312 | 40.766 | 0.000128492 | 0.000040544 | 0.32 | 0.366 |
| 627 | 1267BK12#3674                  | 219 | 40.766 | 0.000465130 | 0.000954689 | 2.05 | 0.056 |
| 628 | 1267BK12#3721                  | 280 | 41.199 | 0.000094223 | 0.000111602 | 1.18 | 0.748 |
| 629 | 1267BK12#3768                  | 191 | 41.631 | 0.001454321 | 0.000987728 | 0.68 | 0.415 |
| 630 | 1267BK12#3768                  | 204 | 41.631 | 0.002075413 | 0.003362512 | 1.62 | 0.490 |
| 631 | 1267BK12#3775                  | 289 | 41.688 | 0.000102837 | 0.000075726 | 0.74 | 0.595 |
| 632 | 1267BK12#3802                  | 345 | 41.945 | 0.000108962 | 0.000067702 | 0.62 | 0.136 |
| 633 | 1267BK12#3802                  | 249 | 41.945 | 0.000083495 | 0.000135476 | 1.62 | 0.230 |
| 634 | 1267BK12#3821                  | 249 | 42.130 | 0.004635384 | 0.000088055 | 0.02 | 0.391 |
| 635 | 1267BK12#3827                  | 204 | 42.167 | 0.075485107 | 0.238195392 | 3.16 | 0.002 |
| 636 | 1267BK12#3827                  | 191 | 42.167 | 0.019262424 | 0.057969370 | 3.01 | 0.003 |
| 637 | 1267BK12#3827                  | 433 | 42.167 | 0.003214682 | 0.010899851 | 3.39 | 0.003 |
| 638 | 1267BK12#3841#3-c-caffeoquinic | 345 | 42.296 | 0.000543963 | 0.001715091 | 3.15 | 0.005 |
| 639 | 1267BK12#3841#3-c-caffeoquinic | 255 | 42.296 | 0.000269272 | 0.000460580 | 1.71 | 0.342 |
| 640 | 1267BK12#3856                  | 204 | 42.434 | 0.196441361 | 0.210208244 | 1.07 | 0.858 |
| 641 | 1267BK12#3856                  | 433 | 42.434 | 0.016844416 | 0.005493078 | 0.33 | 0.340 |
| 642 | 1267BK12#3856                  | 191 | 42.434 | 0.036158591 | 0.037829596 | 1.05 | 0.906 |
| 643 | 1267BK12#3858#5-c-caffeoquinic | 345 | 42.462 | 0.000915279 | 0.001022862 | 1.12 | 0.762 |
| 644 | 1267BK12#3858#5-c-caffeoquinic | 447 | 42.453 | 0.001441962 | 0.000023698 | 0.02 | 0.391 |
| 645 | 1267BK12#3865#4-c-caffeoquinic | 307 | 42.517 | 0.001004049 | 0.001039547 | 1.04 | 0.923 |
| 646 | 1267BK12#3865#4-c-caffeoquinic | 489 | 42.517 | 0.000313741 | 0.000057547 | 0.18 | 0.419 |
| 647 | 1267BK12#3930                  | 396 | 43.127 | 0.000436114 | 0.000082498 | 0.19 | 0.432 |
| 648 | 1267BK12#3930                  | 219 | 43.127 | 0.004076020 | 0.004136939 | 1.01 | 0.976 |
| 649 | 1267BK12#3954                  | 396 | 43.339 | 0.000269650 | 0.000039648 | 0.15 | 0.368 |
| 650 | 1267BK12#3954                  | 219 | 43.339 | 0.002561636 | 0.000244119 | 0.10 | 0.160 |
| 651 | 1267BK12#3963                  | 345 | 43.431 | 0.000118693 | 0.000054685 | 0.46 | 0.289 |
| 652 | 1267BK12#3963                  | 396 | 43.431 | 0.000045267 | 0.000019762 | 0.44 | 0.056 |
| 653 | 1267BK12#3987#3-t-caffeoquinic | 345 | 43.644 | 0.000064442 | 0.000058610 | 0.91 | 0.675 |
| 654 | 1267BK12#3987#3-t-caffeoquinic | 255 | 43.644 | 0.000135465 | 0.000048818 | 0.36 | 0.389 |
| 655 | 1267BK12#3996                  | 204 | 43.730 | 0.161809605 | 0.317988716 | 1.97 | 0.091 |
| 656 | 1267BK12#3996                  | 363 | 43.730 | 0.005415253 | 0.004038616 | 0.75 | 0.535 |
| 657 | 1267BK12#4004                  | 597 | 43.806 | 0.043322393 | 0.015937795 | 0.37 | 0.472 |
| 658 | 1267BK12#4045                  | 249 | 44.176 | 0.000274212 | 0.000168248 | 0.61 | 0.385 |
| 659 | 1267BK12#4045                  | 255 | 44.176 | 0.003303858 | 0.000094056 | 0.03 | 0.375 |
| 660 | 1267BK12#4062#4-t-caffeoquinic | 307 | 44.343 | 0.000079464 | 0.000061929 | 0.78 | 0.266 |
| 661 | 1267BK12#4062#4-t-caffeoquinic | 489 | 44.343 | 0.000031521 | 0.000052796 | 1.67 | 0.272 |
| 662 | 1267BK12#4075#dotriacontane    | 85  | 44.468 | 2.572212548 | 2.251510938 | 0.88 | 0.080 |
| 663 | 1267BK12#4085#5-t-caffeoquinic | 307 | 44.565 | 0.000077421 | 0.000072343 | 0.93 | 0.808 |
| 664 | 1267BK12#4085#5-t-caffeoquinic | 447 | 44.565 | 0.000032229 | 0.000022005 | 0.68 | 0.077 |
| 665 | 1267BK12#4096                  | 204 | 44.658 | 0.001239398 | 0.000390145 | 0.31 | 0.115 |
| 666 | 1267BK12#4096                  | 345 | 44.658 | 0.000093944 | 0.000040984 | 0.44 | 0.078 |
| 667 | 1267BK12#4175                  | 279 | 45.399 | 0.000239304 | 0.000213003 | 0.89 | 0.813 |
| 668 | 1267BK12#4175                  | 255 | 45.399 | 0.000100042 | 0.000084073 | 0.84 | 0.735 |
| 669 | 1267BK12#4278                  | 361 | 46.352 | 0.182274557 | 0.474392265 | 2.60 | 0.001 |
| 670 | 1267BK12#4278                  | 450 | 46.352 | 0.000487511 | 0.001139725 | 2.34 | 0.205 |
| 671 | 1267BK12#4278                  | 319 | 46.352 | 0.007140818 | 0.026724953 | 3.74 | 0.000 |
| 672 | 1267BK12#4302                  | 441 | 46.585 | 0.011792717 | 0.034330675 | 2.91 | 0.002 |
| 673 | 1267BK12#4500#hexatriacontane  | 85  | 48.418 | 2.266417812 | 1.984821912 | 0.88 | 0.078 |
| 674 | 1267BK14#3416                  | 204 | 38.418 | 0.013318841 | 0.012901323 | 0.97 | 0.910 |
| 675 | 1267BK14#3416                  | 217 | 38.418 | 0.004552101 | 0.004537836 | 1.00 | 0.993 |
| 676 | 1267BK14#3416                  | 451 | 38.418 | 0.000911712 | 0.000124525 | 0.14 | 0.380 |

|     |                                |         |        |             |             |      |       |
|-----|--------------------------------|---------|--------|-------------|-------------|------|-------|
| 677 | 1267BK14#3416                  | 361     | 38.418 | 0.004039469 | 0.002446936 | 0.61 | 0.251 |
| 678 | 1267BK38#3430                  | 204     | 38.538 | 0.017549562 | 0.039434020 | 2.25 | 0.023 |
| 679 | 1267BK38#3430                  | 361     | 38.538 | 0.002378486 | 0.003396845 | 1.43 | 0.101 |
| 680 | 1267BK38#3430                  | 423     | 38.538 | 0.000894622 | 0.001383330 | 1.55 | 0.251 |
| 681 | 1267BK38#3466                  | 361     | 38.873 | 0.010071977 | 0.007149685 | 0.71 | 0.603 |
| 682 | 1267BK38#3466                  | 423     | 38.873 | 0.001616263 | 0.000084465 | 0.05 | 0.408 |
| 683 | 1267BK38#3466                  | 217     | 38.873 | 0.020954970 | 0.009473851 | 0.45 | 0.281 |
| 684 | 1267BK38#4348                  | 259     | 47.146 | 0.000085852 | 0.000085757 | 1.00 | 0.998 |
| 685 | 1267BK38#4348                  | 217     | 47.146 | 0.000182150 | 0.000174941 | 0.96 | 0.925 |
| 686 | 1267BK38#4348                  | 349     | 47.146 | 0.000025124 | 0.000032221 | 1.28 | 0.423 |
| 687 | 1267BK38#4360                  | 361     | 47.254 | 0.000094157 | 0.000068241 | 0.72 | 0.343 |
| 688 | 1267BK38#4360                  | 204     | 47.254 | 0.000184522 | 0.000174088 | 0.94 | 0.838 |
| 689 | 1267BK38#4360                  | 271     | 47.254 | 0.000055056 | 0.000057324 | 1.04 | 0.922 |
| 690 | 1283BV06#2056#glyceric-3-P     | 357     | 25.932 | 0.003454063 | 0.002132847 | 0.62 | 0.091 |
| 691 | 1286BU03#0764#norvaline 2      | 144     | 14.409 | 0.000542816 | 0.000596734 | 1.10 | 0.887 |
| 692 | 1286BU03#0764#norvaline 2      | 218     | 14.409 | 0.008170127 | 0.000110535 | 0.01 | 0.178 |
| 693 | 1286BU04#2069#isocitric        | 245     | 26.178 | 0.028169646 | 0.007026241 | 0.25 | 0.437 |
| 694 | 1286BU04#2069#isocitric        | 375     | 26.178 | 0.104704392 | 0.098157941 | 0.94 | 0.853 |
| 695 | 1286BU07#2401#saccharic        | 292     | 29.206 | 0.004150191 | 0.008903920 | 2.15 | 0.041 |
| 696 | 1286BU08#2094                  | 160     | 26.428 | 0.008381594 | 0.009278467 | 1.11 | 0.771 |
| 697 | 1286BU08#2094                  | 334     | 26.428 | 0.001470557 | 0.000371103 | 0.25 | 0.368 |
| 698 | 1286BU08#2094                  | 189     | 26.428 | 0.002119142 | 0.002116492 | 1.00 | 0.999 |
| 699 | 1286BU08#2283#galacturonic MX1 | 160     | 28.162 | 0.003495111 | 0.026471248 | 7.57 | 0.411 |
| 700 | 1286BU08#2314#galacturonic MX2 | 160     | 28.449 | 0.001719500 | 0.000882558 | 0.51 | 0.476 |
| 701 | 1286BU10#2380#gluconic         | 333     | 29.046 | 0.034844498 | 0.021033265 | 0.60 | 0.235 |
| 702 | 1286BU10#2380#gluconic         | 292     | 29.046 | 0.028526453 | 0.032322487 | 1.13 | 0.730 |
| 703 | 1286BU10#2380#gluconic         | 423     | 29.046 | 0.004339764 | 0.002514239 | 0.58 | 0.333 |
| 704 | 1286BU10#2380#gluconic         | 433     | 29.046 | 0.016284199 | 0.003375076 | 0.21 | 0.377 |
| 705 | 1286BU13#1452#g-aminobutyric 3 | 174     | 20.640 | 0.615801065 | 1.194297808 | 1.94 | 0.055 |
| 706 | 1286BU13#1452#g-aminobutyric 3 | 304     | 20.640 | 0.247364784 | 0.233790718 | 0.95 | 0.898 |
| 707 | 1310BK02#3728#d-tocopherol     | 474+475 | 41.175 | 0.000054501 | 0.000045172 | 0.83 | 0.575 |
| 708 | 1310BK02#3728#d-tocopherol     | 208     | 41.175 | 0.000319473 | 0.000232004 | 0.73 | 0.465 |
| 709 | 1310BK02#3834#b-tocopherol     | 488+489 | 42.144 | 0.000065954 | 0.000064406 | 0.98 | 0.945 |
| 710 | 1310BK02#3834#b-tocopherol     | 223     | 42.144 | 0.000499417 | 0.000224516 | 0.45 | 0.551 |
| 711 | 1310BK02#3848#g-tocopherol     | 488+489 | 42.273 | 0.000040755 | 0.000034712 | 0.85 | 0.682 |
| 712 | 1310BK02#3848#g-tocopherol     | 223     | 42.273 | 0.000088537 | 0.000118484 | 1.34 | 0.477 |
| 713 | 1310BK02#4014#a-tocopherol     | 502+503 | 43.815 | 0.000084226 | 0.000049066 | 0.58 | 0.092 |
| 714 | 1310BK02#4014#a-tocopherol     | 237     | 43.815 | 0.001794024 | 0.000083180 | 0.05 | 0.384 |
| 715 | 1310BK02#4065#a-tocopherolacet | 430     | 44.291 | 0.000098842 | 0.000083688 | 0.85 | 0.738 |
| 716 | 1310BK02#4065#a-tocopherolacet | 165     | 44.291 | 0.000176194 | 0.000204600 | 1.16 | 0.771 |
| 717 | 1323AU19#2803#myo-ino-1-P 1    | 299     | 35.149 | 0.001700509 | 0.001714414 | 1.01 | 0.971 |
| 718 | 1323AU19#2803#myo-ino-1-P 1    | 318     | 35.149 | 0.002119435 | 0.003359978 | 1.59 | 0.097 |
| 719 | 1323AU19#2803#myo-ino-1-P 1    | 387     | 35.149 | 0.000526837 | 0.000943592 | 1.79 | 0.123 |
| 720 | 1323AU19#2897#myo-ino-1-P 2    | 318     | 35.928 | 0.000121159 | 0.000110073 | 0.91 | 0.799 |
| 721 | 1323AU19#2897#myo-ino-1-P 2    | 387     | 35.928 | 0.000036322 | 0.000035732 | 0.98 | 0.937 |
| 722 | 1323AU19#2897#myo-ino-1-P 2    | 494     | 35.928 | 0.000042748 | 0.000026572 | 0.62 | 0.247 |
| 723 | 1323AU30#3400#isomaltose       | 361     | 40.963 | 0.002913065 | 0.007428176 | 2.55 | 0.032 |
| 724 | 1323AU30#3400#isomaltose       | 160     | 40.963 | 0.000803882 | 0.002360852 | 2.94 | 0.032 |
| 725 | 1323AU30#3400#isomaltose       | 480     | 40.963 | 0.000090606 | 0.000348941 | 3.85 | 0.015 |
| 726 | 1323AU39#2079#ononitol         | 265     | 28.275 | 0.001149028 | 0.000639766 | 0.56 | 0.272 |
| 727 | 1323AU39#2079#ononitol         | 318     | 28.275 | 0.002215326 | 0.002611919 | 1.18 | 0.671 |
| 728 | 1323AU39#2079#ononitol         | 507     | 28.275 | 0.000177625 | 0.000089217 | 0.50 | 0.149 |
| 729 | 1324BK14#2728#glc-6-P MX1      | 160     | 33.886 | 0.009571304 | 0.003574372 | 0.37 | 0.492 |
| 730 | 1324BK14#2752#glc-6-P MX2      | 299     | 34.122 | 0.000713643 | 0.001764985 | 2.47 | 0.261 |
| 731 | 1324BK14#2752#glc-6-P MX2      | 471     | 34.122 | 0.000840806 | 0.000397222 | 0.47 | 0.586 |
| 732 | 1324BK16#2662#fru-6-P MX       | 459     | 33.716 | 0.000131611 | 0.000293434 | 2.23 | 0.290 |
| 733 | 1324BK20#2928#gluconic-6-P     | 299     | 35.281 | 0.000602761 | 0.000060348 | 0.10 | 0.209 |
| 734 | 1324BK20#2928#gluconic-6-P     | 387     | 35.281 | 0.000893097 | 0.000051631 | 0.06 | 0.385 |
| 735 | 1324BK22#2721#man-6-P MX1      | 387     | 33.720 | 0.001187156 | 0.001380004 | 1.16 | 0.641 |
| 736 | 1324BK22#2721#man-6-P MX1      | 160     | 33.720 | 0.002147911 | 0.002139317 | 1.00 | 0.992 |
| 737 | 1324BK22#2739#man-6-P MX2      | 387     | 33.893 | 0.005999733 | 0.007501585 | 1.25 | 0.736 |
| 738 | 1324BK23#1767#glycerol-3-P MX1 | 384     | 24.156 | 0.000050839 | 0.000028550 | 0.56 | 0.168 |
| 739 | 1324BK23#1767#glycerol-3-P MX1 | 299     | 24.156 | 0.000274394 | 0.000218905 | 0.80 | 0.650 |



|     |                                |     |        |             |             |      |       |
|-----|--------------------------------|-----|--------|-------------|-------------|------|-------|
| 740 | 1324BK23#1792#glyceral-3-P MX2 | 328 | 24.394 | 0.000146902 | 0.000437483 | 2.98 | 0.254 |
| 741 | 1324BK23#1792#glyceral-3-P MX2 | 299 | 24.395 | 0.004340765 | 0.000339570 | 0.08 | 0.412 |
| 742 | 1324BK24#1877#glycerol-1-P     | 357 | 25.120 | 0.002490244 | 0.006390816 | 2.57 | 0.001 |
| 743 | 1324BK24#1877#glycerol-1-P     | 299 | 25.120 | 0.003329256 | 0.007208658 | 2.17 | 0.006 |
| 744 | 1324BK31#2823#myo-ino-2-P 1    | 387 | 35.131 | 0.000538397 | 0.000943592 | 1.75 | 0.120 |
| 745 | 1324BK31#2898#myo-ino-2-P 2    | 387 | 35.873 | 0.000052185 | 0.000051527 | 0.99 | 0.951 |
| 746 | 1324BK31#2898#myo-ino-2-P 2    | 318 | 35.873 | 0.000189551 | 0.000113040 | 0.60 | 0.363 |
| 747 | 1325BK16#0403#d4-alanine 2     | 120 | 11.028 | 0.003972608 | 0.014430561 | 3.63 | 0.075 |
| 748 | 1325BK16#0914#g-aminobutyric 2 | 102 | 15.830 | 0.085118225 | 0.026856588 | 0.32 | 0.131 |
| 749 | 1325BK16#0914#g-aminobutyric 2 | 232 | 15.830 | 0.007689593 | 0.003180694 | 0.41 | 0.050 |
| 750 | 1325BK16#1034                  | 266 | 16.936 | 0.647355353 | 0.391328956 | 0.60 | 0.379 |
| 751 | 1325BK16#1034                  | 192 | 16.936 | 1.982360829 | 2.311879957 | 1.17 | 0.705 |
| 752 | 1325BK16#1302                  | 338 | 19.407 | 0.058159082 | 0.037681224 | 0.65 | 0.502 |
| 753 | 1325BK16#1302                  | 236 | 19.407 | 0.242499288 | 0.375001110 | 1.55 | 0.363 |
| 754 | 1325BK16#1308                  | 232 | 19.462 | 0.024854129 | 0.034510842 | 1.39 | 0.405 |
| 755 | 1325BK16#1403                  | 283 | 20.347 | 0.009142633 | 0.005753935 | 0.63 | 0.208 |
| 756 | 1325BK16#1537                  | 247 | 21.624 | 0.009948456 | 0.017594343 | 1.77 | 0.075 |
| 757 | 1325BK16#1537                  | 349 | 21.624 | 0.002155335 | 0.003168425 | 1.47 | 0.036 |
| 758 | 1325BK16#1546                  | 306 | 21.692 | 0.016042891 | 0.010913847 | 0.68 | 0.165 |
| 759 | 1325BK16#1552                  | 142 | 21.757 | 0.024774101 | 0.034979497 | 1.41 | 0.176 |
| 760 | 1325BK16#1552                  | 186 | 21.757 | 0.026144865 | 0.030141316 | 1.15 | 0.499 |
| 761 | 1325BK16#1589                  | 273 | 22.099 | 0.015354306 | 0.023484319 | 1.53 | 0.233 |
| 762 | 1325BK16#1610                  | 160 | 22.293 | 0.007087330 | 0.001589561 | 0.22 | 0.321 |
| 763 | 1325BK16#1749                  | 159 | 23.595 | 0.003955916 | 0.003273602 | 0.83 | 0.827 |
| 764 | 1325BK16#1900                  | 273 | 25.004 | 0.047710802 | 0.048962005 | 1.03 | 0.946 |
| 765 | 1325BK16#1946                  | 174 | 25.435 | 0.004286699 | 0.003721854 | 0.87 | 0.828 |
| 766 | 1325BK16#1946                  | 299 | 25.435 | 0.001916988 | 0.005087199 | 2.65 | 0.229 |
| 767 | 1325BK16#2257                  | 203 | 28.362 | 0.004515106 | 0.004433809 | 0.98 | 0.980 |
| 768 | 1325BK16#2261                  | 299 | 28.410 | 0.010805689 | 0.015094837 | 1.40 | 0.245 |
| 769 | 1325BK16#2261                  | 204 | 28.410 | 0.005292764 | 0.007852784 | 1.48 | 0.484 |
| 770 | 1325BK16#2280                  | 284 | 28.593 | 0.000193077 | 0.000110297 | 0.57 | 0.418 |
| 771 | 1325BK16#2280                  | 244 | 28.593 | 0.000543684 | 0.000294573 | 0.54 | 0.358 |
| 772 | 1325BK16#2372                  | 185 | 29.448 | 0.000807060 | 0.000250898 | 0.31 | 0.414 |
| 773 | 1325BK16#2500#uric 4           | 456 | 30.735 | 0.003232018 | 0.003404309 | 1.05 | 0.869 |
| 774 | 1325BK16#2500#uric 4           | 441 | 30.735 | 0.003526632 | 0.004115954 | 1.17 | 0.733 |
| 775 | 1325BK16#2538                  | 319 | 31.100 | 0.010829536 | 0.012046880 | 1.11 | 0.790 |
| 776 | 1325BK16#2547                  | 319 | 31.189 | 0.012825495 | 0.013594824 | 1.06 | 0.884 |
| 777 | 1325BK16#2620                  | 199 | 31.914 | 0.000106956 | 0.000159665 | 1.49 | 0.429 |
| 778 | 1325BK16#2633                  | 263 | 32.041 | 0.001298863 | 0.001840609 | 1.42 | 0.771 |
| 779 | 1325BK16#2721                  | 179 | 32.913 | 0.001897693 | 0.001023403 | 0.54 | 0.362 |
| 780 | 1325BK16#2781                  | 250 | 33.500 | 0.000176659 | 0.000278768 | 1.58 | 0.230 |
| 781 | 1325BK16#2785                  | 246 | 33.539 | 0.000173632 | 0.000278082 | 1.60 | 0.265 |
| 782 | 1325BK16#2906                  | 387 | 34.720 | 0.000066762 | 0.000032901 | 0.49 | 0.081 |
| 783 | 1325BK16#2906                  | 299 | 34.720 | 0.000836079 | 0.000460687 | 0.55 | 0.615 |
| 784 | 1325BK16#2954                  | 390 | 35.184 | 0.000135397 | 0.000156293 | 1.15 | 0.665 |
| 785 | 1325BK16#2978                  | 348 | 35.419 | 0.000078978 | 0.000057330 | 0.73 | 0.454 |
| 786 | 1325BK16#3052                  | 374 | 36.146 | 0.003036523 | 0.000041678 | 0.01 | 0.393 |
| 787 | 1325BK16#3060                  | 374 | 36.226 | 0.000032995 | 0.000052527 | 1.59 | 0.194 |
| 788 | 1325BK16#3075                  | 374 | 36.376 | 0.000081081 | 0.000028463 | 0.35 | 0.280 |
| 789 | 1325BK16#3075                  | 260 | 36.376 | 0.000189302 | 0.000205787 | 1.09 | 0.718 |
| 790 | 1325BK16#3089                  | 204 | 36.514 | 0.141770989 | 0.233521884 | 1.65 | 0.178 |
| 791 | 1325BK16#3089                  | 421 | 36.514 | 0.008757495 | 0.000044344 | 0.01 | 0.391 |
| 792 | 1325BK16#3138                  | 462 | 37.006 | 0.005330192 | 0.000015891 | 0.00 | 0.391 |
| 793 | 1325BK16#3138                  | 204 | 37.006 | 0.014026342 | 0.013890590 | 0.99 | 0.981 |
| 794 | 1325BK16#3148                  | 473 | 37.105 | 0.000020919 | 0.000015342 | 0.73 | 0.482 |
| 795 | 1325BK16#3171                  | 271 | 37.336 | 0.000899344 | 0.001135784 | 1.26 | 0.537 |
| 796 | 1325BK16#3184                  | 186 | 37.464 | 0.000134316 | 0.000075210 | 0.56 | 0.340 |
| 797 | 1325BK16#3191                  | 204 | 37.533 | 0.001398417 | 0.001255155 | 0.90 | 0.835 |
| 798 | 1325BK16#3191                  | 117 | 37.533 | 0.002001070 | 0.002989107 | 1.49 | 0.389 |
| 799 | 1325BK16#3281                  | 423 | 38.416 | 0.004640113 | 0.000404758 | 0.09 | 0.391 |
| 800 | 1325BK16#3284                  | 349 | 38.446 | 0.000128130 | 0.000151692 | 1.18 | 0.840 |
| 801 | 1325BK16#3284                  | 259 | 38.446 | 0.000307608 | 0.000571977 | 1.86 | 0.238 |
| 802 | 1325BK16#3293                  | 156 | 38.535 | 0.000263652 | 0.000173686 | 0.66 | 0.312 |

|     |                                |     |        |             |             |       |       |
|-----|--------------------------------|-----|--------|-------------|-------------|-------|-------|
| 803 | 1325BK16#3293                  | 317 | 38.535 | 0.006021744 | 0.000366325 | 0.06  | 0.404 |
| 804 | 1325BK16#3299                  | 450 | 38.593 | 0.000772421 | 0.000701527 | 0.91  | 0.785 |
| 805 | 1325BK16#3299                  | 284 | 38.593 | 0.001200201 | 0.002017329 | 1.68  | 0.162 |
| 806 | 1325BK16#3311                  | 175 | 38.712 | 0.000122137 | 0.000151953 | 1.24  | 0.561 |
| 807 | 1325BK16#3387                  | 466 | 39.459 | 0.000478613 | 0.000201288 | 0.42  | 0.288 |
| 808 | 1325BK16#3387                  | 262 | 39.459 | 0.001133867 | 0.000788325 | 0.70  | 0.478 |
| 809 | 1325BK16#3392                  | 433 | 39.508 | 0.000444409 | 0.000467953 | 1.05  | 0.835 |
| 810 | 1325BK16#3414                  | 160 | 39.724 | 0.002246874 | 0.002126526 | 0.95  | 0.776 |
| 811 | 1325BK16#3426                  | 348 | 39.842 | 0.000840346 | 0.001584844 | 1.89  | 0.121 |
| 812 | 1325BK16#3481                  | 355 | 40.380 | 0.000172875 | 0.000187483 | 1.08  | 0.725 |
| 813 | 1325BK16#3496                  | 189 | 40.533 | 0.002732510 | 0.000528152 | 0.19  | 0.372 |
| 814 | 1325BK16#3496                  | 204 | 40.533 | 0.006907593 | 0.010500875 | 1.52  | 0.214 |
| 815 | 1325BK16#3521                  | 312 | 40.778 | 0.000043595 | 0.000046714 | 1.07  | 0.806 |
| 816 | 1325BK16#3530                  | 525 | 40.866 | 0.001413478 | 0.000073163 | 0.05  | 0.395 |
| 817 | 1325BK16#3530                  | 204 | 40.866 | 0.006669204 | 0.016053205 | 2.41  | 0.044 |
| 818 | 1325BK16#3530                  | 345 | 40.866 | 0.000178937 | 0.000227998 | 1.27  | 0.482 |
| 819 | 1325BK16#3549                  | 251 | 41.051 | 0.000052389 | 0.000129458 | 2.47  | 0.035 |
| 820 | 1325BK16#3549                  | 292 | 41.051 | 0.000389182 | 0.000138110 | 0.35  | 0.484 |
| 821 | 1325BK16#3566                  | 332 | 41.216 | 0.001023390 | 0.001258438 | 1.23  | 0.180 |
| 822 | 1325BK16#3566                  | 361 | 41.216 | 0.000546066 | 0.001433235 | 2.62  | 0.034 |
| 823 | 1325BK16#3571                  | 358 | 41.255 | 0.000313585 | 0.000048321 | 0.15  | 0.399 |
| 824 | 1325BK16#3607                  | 251 | 41.615 | 0.000071874 | 0.000133479 | 1.86  | 0.132 |
| 825 | 1325BK16#3607                  | 292 | 41.615 | 0.000085037 | 0.000079520 | 0.94  | 0.908 |
| 826 | 1325BK16#3614                  | 318 | 41.684 | 0.000563032 | 0.000271379 | 0.48  | 0.589 |
| 827 | 1325BK16#3622                  | 204 | 41.762 | 0.004648494 | 0.007680504 | 1.65  | 0.046 |
| 828 | 1325BK16#3663                  | 318 | 42.161 | 0.020994566 | 0.004722833 | 0.22  | 0.452 |
| 829 | 1325BK16#3692                  | 318 | 42.441 | 0.068828030 | 0.004719369 | 0.07  | 0.382 |
| 830 | 1325BK16#3703                  | 204 | 42.548 | 0.194863589 | 0.210208244 | 1.08  | 0.845 |
| 831 | 1325BK16#3703                  | 259 | 42.548 | 0.000609758 | 0.000436824 | 0.72  | 0.544 |
| 832 | 1325BK16#3802                  | 375 | 43.487 | 0.000065066 | 0.000134376 | 2.07  | 0.177 |
| 833 | 1325BK16#3802                  | 318 | 43.487 | 0.000103943 | 0.000155622 | 1.50  | 0.505 |
| 834 | 1325BK16#3825                  | 91  | 43.721 | 0.036551214 | 0.001022041 | 0.03  | 0.389 |
| 835 | 1325BK16#3825                  | 204 | 43.721 | 0.161125388 | 0.317213465 | 1.97  | 0.096 |
| 836 | 1325BK16#3923                  | 91  | 44.673 | 0.000236805 | 0.000338962 | 1.43  | 0.376 |
| 837 | 1325BK16#3923                  | 204 | 44.673 | 0.000863766 | 0.000238479 | 0.28  | 0.128 |
| 838 | 1325BK16#3944                  | 349 | 44.873 | 0.000034916 | 0.000040972 | 1.17  | 0.699 |
| 839 | 1325BK16#3976                  | 119 | 45.182 | 0.000419006 | 0.000150197 | 0.36  | 0.108 |
| 840 | 1325BK16#3976                  | 259 | 45.182 | 0.000599355 | 0.000097785 | 0.16  | 0.389 |
| 841 | 1325BK16#4011                  | 91  | 45.511 | 0.000205822 | 0.000249283 | 1.21  | 0.696 |
| 842 | 1325BK16#4011                  | 204 | 45.511 | 0.001003760 | 0.000428128 | 0.43  | 0.027 |
| 843 | 1325BK16#4041                  | 349 | 45.796 | 0.000032671 | 0.000023798 | 0.73  | 0.417 |
| 844 | 1325BK16#4304                  | 441 | 48.284 | 0.001706020 | 0.000288251 | 0.17  | 0.185 |
| 845 | 1331BK22#2910                  | 202 | 34.720 | 0.006668305 | 0.000170147 | 0.03  | 0.022 |
| 846 | 1331BK22#2910                  | 361 | 34.720 | 0.016303169 | 0.004717528 | 0.29  | 0.058 |
| 847 | 1333BN04#2233#galacturonic MX1 | 333 | 28.162 | 0.001821804 | 0.001550419 | 0.85  | 0.716 |
| 848 | 1333BN06#2264#galacturonic MX1 | 364 | 28.162 | 0.000416797 | 0.000207766 | 0.50  | 0.198 |
| 849 | 1333BN06#2295#galacturonic MX2 | 333 | 28.450 | 0.003997324 | 0.005223448 | 1.31  | 0.417 |
| 850 | 1333BN06#2376#saccharic        | 373 | 29.206 | 0.002089970 | 0.000223006 | 0.11  | 0.373 |
| 851 | 1333BN07#2253                  | 243 | 28.406 | 0.011981039 | 0.002408884 | 0.20  | 0.400 |
| 852 | 1333BN09#2268                  | 333 | 28.910 | 0.021542766 | 0.013865641 | 0.64  | 0.336 |
| 853 | 1333BN09#2268                  | 292 | 28.910 | 0.044973804 | 0.040765753 | 0.91  | 0.453 |
| 854 | 1334BV09#1143#O-acet-serine    | 174 | 17.897 | 0.019121941 | 0.101502347 | 5.31  | 0.000 |
| 855 | 1334BV11#1880#putrescine 4     | 361 | 24.487 | 0.050599351 | 0.132123919 | 2.61  | 0.044 |
| 856 | 1334BV11#1880#putrescine 4     | 214 | 24.487 | 0.108519696 | 0.739976474 | 6.82  | 0.001 |
| 857 | 1334BV11#1885                  | 256 | 24.533 | 0.448709732 | 0.204566209 | 0.46  | 0.600 |
| 858 | 1334BV12#1883                  | 174 | 24.533 | 0.184928879 | 2.206757957 | 11.93 | 0.152 |
| 859 | 1334BV12#1883                  | 213 | 24.533 | 0.054654977 | 0.349920299 | 6.40  | 0.000 |
| 860 | 1334BV12#1883                  | 314 | 24.533 | 0.047156957 | 0.348286762 | 7.39  | 0.000 |
| 861 | 1334BV17#1407#N-acet-serine    | 132 | 20.301 | 0.008936142 | 0.019880796 | 2.22  | 0.002 |
| 862 | 1334BV17#1407#N-acet-serine    | 186 | 20.301 | 0.009045870 | 0.027980849 | 3.09  | 0.000 |
| 863 | 1334BV17#1407#N-acet-serine    | 261 | 20.301 | 0.014809481 | 0.020893224 | 1.41  | 0.445 |
| 864 | 1334BV19#3944                  | 204 | 43.806 | 0.163215030 | 0.317487561 | 1.95  | 0.094 |
| 865 | 1334BV19#3944                  | 337 | 43.806 | 0.014092794 | 0.017313144 | 1.23  | 0.467 |

|     |                             |     |        |             |             |       |       |
|-----|-----------------------------|-----|--------|-------------|-------------|-------|-------|
| 866 | 1334BV20#2975               | 451 | 34.690 | 0.009064386 | 0.004063969 | 0.45  | 0.079 |
| 867 | 1334BV20#2975               | 375 | 34.690 | 0.018846756 | 0.009357178 | 0.50  | 0.050 |
| 868 | 1334BV20#3961               | 202 | 43.806 | 0.034415765 | 0.000876529 | 0.03  | 0.029 |
| 869 | 1334BV20#3961               | 227 | 43.806 | 0.054230985 | 0.001335351 | 0.02  | 0.172 |
| 870 | 1334BV21#1152#O-acet-serine | 116 | 17.897 | 0.010025907 | 0.037160811 | 3.71  | 0.000 |
| 871 | 1334BV21#1152#O-acet-serine | 132 | 17.897 | 0.013700058 | 0.045013923 | 3.29  | 0.001 |
| 872 | 1334BV21#1407               | 289 | 20.257 | 0.002663213 | 0.031839085 | 11.96 | 0.004 |
| 873 | 1334BV21#1407               | 304 | 20.257 | 0.074019845 | 0.015379180 | 0.21  | 0.477 |
| 874 | 1334BV21#2181               | 174 | 27.244 | 0.109747383 | 0.897144421 | 8.17  | 0.000 |
| 875 | 1334BV21#2181               | 347 | 27.244 | 0.010604683 | 0.074711442 | 7.05  | 0.001 |
| 876 | 1334BV21#2181               | 405 | 27.244 | 0.057864892 | 0.046725488 | 0.81  | 0.841 |
| 877 | 1334BV27#1828               | 392 | 24.032 | 0.006547375 | 0.003782452 | 0.58  | 0.111 |
| 878 | 1334BV27#1828               | 275 | 24.032 | 0.037092511 | 0.018578609 | 0.50  | 0.539 |
| 879 | 1334BV27#2301               | 257 | 28.358 | 0.015662859 | 0.005377805 | 0.34  | 0.151 |
| 880 | 1334BV27#2301               | 188 | 28.358 | 0.010013559 | 0.017601662 | 1.76  | 0.348 |
| 881 | 1334BV27#3745               | 361 | 41.695 | 0.003758417 | 0.000573762 | 0.15  | 0.085 |
| 882 | 1334BV27#3745               | 306 | 41.695 | 0.001542784 | 0.000101538 | 0.07  | 0.157 |
| 883 | 1334BV27#3745               | 217 | 41.695 | 0.003572058 | 0.002423672 | 0.68  | 0.392 |
| 884 | 1334BV27#3812               | 361 | 42.311 | 0.002567016 | 0.000137671 | 0.05  | 0.055 |
| 885 | 1334BV27#3812               | 319 | 42.311 | 0.002348970 | 0.000083334 | 0.04  | 0.346 |
| 886 | 1334BV27#3812               | 85  | 42.311 | 0.006461335 | 0.007931136 | 1.23  | 0.517 |
| 887 | 1334BV27#3844               | 140 | 42.609 | 0.010028063 | 0.000705641 | 0.07  | 0.033 |
| 888 | 1334BV27#3844               | 361 | 42.609 | 0.004254137 | 0.000306263 | 0.07  | 0.050 |
| 889 | 1334BV27#3844               | 169 | 42.609 | 0.065552624 | 0.063133639 | 0.96  | 0.975 |
| 890 | 1334BV27#3864               | 324 | 42.790 | 0.096841848 | 0.350102689 | 3.62  | 0.001 |
| 891 | 1334BV27#3864               | 361 | 42.790 | 0.067146042 | 0.272861836 | 4.06  | 0.002 |
| 892 | 1334BV27#3864               | 450 | 42.790 | 0.015779252 | 0.065838294 | 4.17  | 0.003 |
| 893 | 1334BV27#3887               | 361 | 42.991 | 0.028931947 | 0.144012624 | 4.98  | 0.203 |
| 894 | 1334BV27#3887               | 217 | 42.991 | 0.016041721 | 0.213894502 | 13.33 | 0.046 |
| 895 | 1334BV27#3887               | 169 | 42.991 | 0.023057885 | 0.097515076 | 4.23  | 0.075 |
| 896 | 1334BV27#3920               | 361 | 43.298 | 0.010611502 | 0.000312752 | 0.03  | 0.014 |
| 897 | 1334BV27#3920               | 217 | 43.298 | 0.007202977 | 0.001121681 | 0.16  | 0.048 |
| 898 | 1334BV27#3920               | 169 | 43.298 | 0.002774307 | 0.000244432 | 0.09  | 0.092 |
| 899 | 1334BV27#4011               | 130 | 44.138 | 0.019117235 | 0.000799440 | 0.04  | 0.032 |
| 900 | 1334BV27#4011               | 155 | 44.138 | 0.009138850 | 0.000517378 | 0.06  | 0.002 |
| 901 | 1334BV27#4011               | 361 | 44.138 | 0.009503110 | 0.000342164 | 0.04  | 0.071 |
| 902 | 1334BV27#4073               | 105 | 44.722 | 0.001641770 | 0.000199702 | 0.12  | 0.001 |
| 903 | 1334BV27#4073               | 361 | 44.722 | 0.000755270 | 0.000071820 | 0.10  | 0.024 |
| 904 | 1334BV27#4073               | 217 | 44.722 | 0.001702394 | 0.000271739 | 0.16  | 0.013 |
| 905 | 1334BV27#4103               | 257 | 45.004 | 0.006835972 | 0.000700614 | 0.10  | 0.033 |
| 906 | 1334BV27#4103               | 232 | 45.004 | 0.006525541 | 0.000594913 | 0.09  | 0.030 |
| 907 | 1334BV27#4103               | 379 | 45.004 | 0.000604501 | 0.000046692 | 0.08  | 0.020 |
| 908 | 1334BV28#1746               | 275 | 23.324 | 0.082479840 | 0.286401690 | 3.47  | 0.001 |
| 909 | 1334BV28#1746               | 244 | 23.324 | 0.016126066 | 0.038675797 | 2.40  | 0.000 |
| 910 | 1334BV28#1746               | 155 | 23.324 | 0.019520045 | 0.048041487 | 2.46  | 0.004 |
| 911 | 1334BV28#1779               | 243 | 23.526 | 0.027543474 | 0.235628295 | 8.55  | 0.000 |
| 912 | 1334BV28#1779               | 345 | 23.526 | 0.004053317 | 0.031525732 | 7.78  | 0.000 |
| 913 | 1334BV28#1779               | 317 | 23.526 | 0.003172997 | 0.026618213 | 8.39  | 0.000 |
| 914 | 1334BV28#1818               | 319 | 23.978 | 0.023657432 | 0.095305739 | 4.03  | 0.000 |
| 915 | 1334BV28#1818               | 304 | 23.978 | 0.012954144 | 0.042036384 | 3.25  | 0.000 |
| 916 | 1334BV28#1818               | 190 | 23.978 | 0.042211419 | 0.044549711 | 1.06  | 0.944 |
| 917 | 1334BV28#2060               | 231 | 26.208 | 0.019910155 | 0.019249067 | 0.97  | 0.896 |
| 918 | 1334BV28#2060               | 333 | 26.208 | 0.007034101 | 0.008293698 | 1.18  | 0.396 |
| 919 | 1334BV28#2060               | 480 | 26.208 | 0.076684569 | 0.004294175 | 0.06  | 0.392 |
| 920 | 1334BV28#2242               | 200 | 27.883 | 0.002098240 | 0.033866870 | 16.14 | 0.059 |
| 921 | 1334BV28#2242               | 389 | 27.883 | 0.000779830 | 0.017085692 | 21.91 | 0.065 |
| 922 | 1334BV28#2242               | 506 | 27.883 | 0.001359809 | 0.003464471 | 2.55  | 0.264 |
| 923 | 1334BV28#2287               | 347 | 28.308 | 0.015974135 | 0.015057173 | 0.94  | 0.879 |
| 924 | 1334BV28#2287               | 232 | 28.308 | 0.049422128 | 0.077897884 | 1.58  | 0.211 |
| 925 | 1334BV28#2287               | 449 | 28.308 | 0.017542087 | 0.029747723 | 1.70  | 0.190 |
| 926 | 1334BV28#2613               | 326 | 31.222 | 0.002253590 | 0.005768437 | 2.56  | 0.332 |
| 927 | 1334BV28#2613               | 290 | 31.222 | 0.001471725 | 0.009486040 | 6.45  | 0.025 |
| 928 | 1334BV28#2613               | 428 | 31.222 | 0.000674179 | 0.002285024 | 3.39  | 0.328 |

|     |                              |     |        |             |             |       |       |
|-----|------------------------------|-----|--------|-------------|-------------|-------|-------|
| 929 | 1334BV28#3011                | 204 | 35.139 | 0.003012987 | 0.045683574 | 15.16 | 0.017 |
| 930 | 1334BV28#3011                | 157 | 35.139 | 0.001248754 | 0.020031308 | 16.04 | 0.020 |
| 931 | 1334BV28#3011                | 191 | 35.139 | 0.001368091 | 0.011004014 | 8.04  | 0.018 |
| 932 | 1334BV28#3022                | 204 | 35.238 | 0.003026673 | 0.017294964 | 5.71  | 0.006 |
| 933 | 1334BV28#3022                | 157 | 35.238 | 0.001987489 | 0.018743722 | 9.43  | 0.006 |
| 934 | 1334BV28#3022                | 331 | 35.238 | 0.000373699 | 0.003450031 | 9.23  | 0.007 |
| 935 | 1334BV28#3050                | 105 | 35.495 | 0.005747475 | 0.010814237 | 1.88  | 0.052 |
| 936 | 1334BV28#3050                | 331 | 35.495 | 0.002682082 | 0.000757116 | 0.28  | 0.387 |
| 937 | 1334BV28#3050                | 217 | 35.495 | 0.006351564 | 0.011195080 | 1.76  | 0.075 |
| 938 | 1334BV28#3103                | 446 | 35.994 | 0.000103767 | 0.000438970 | 4.23  | 0.073 |
| 939 | 1334BV28#3103                | 415 | 35.994 | 0.001153074 | 0.000112620 | 0.10  | 0.375 |
| 940 | 1334BV28#3103                | 217 | 35.994 | 0.000909262 | 0.001991245 | 2.19  | 0.531 |
| 941 | 1334BV28#3422                | 406 | 38.997 | 0.015717168 | 0.012454690 | 0.79  | 0.408 |
| 942 | 1334BV28#3422                | 217 | 38.997 | 0.021194913 | 0.026528449 | 1.25  | 0.529 |
| 943 | 1334BV28#3422                | 495 | 38.997 | 0.001050859 | 0.001304652 | 1.24  | 0.592 |
| 944 | 1334BV28#3687                | 324 | 41.474 | 0.002904317 | 0.012180906 | 4.19  | 0.000 |
| 945 | 1334BV28#3687                | 450 | 41.474 | 0.001321282 | 0.002262947 | 1.71  | 0.165 |
| 946 | 1334BV28#3687                | 361 | 41.474 | 0.003302856 | 0.010237131 | 3.10  | 0.002 |
| 947 | 1334BV28#3753                | 204 | 42.076 | 0.016346717 | 0.178044187 | 10.89 | 0.000 |
| 948 | 1334BV28#3753                | 357 | 42.076 | 0.001095448 | 0.010521016 | 9.60  | 0.000 |
| 949 | 1334BV28#3753                | 239 | 42.076 | 0.001010696 | 0.011125791 | 11.01 | 0.000 |
| 950 | 1334BV28#3871                | 354 | 43.152 | 0.013056409 | 0.038383956 | 2.94  | 0.001 |
| 951 | 1334BV28#3871                | 361 | 43.152 | 0.008185596 | 0.020973322 | 2.56  | 0.009 |
| 952 | 1334BV28#3871                | 450 | 43.152 | 0.012927688 | 0.007683678 | 0.59  | 0.628 |
| 953 | 1338AU05#2775#sorbitol-6-P   | 387 | 34.463 | 0.000062949 | 0.000068773 | 1.09  | 0.777 |
| 954 | 1338AU05#2775#sorbitol-6-P   | 299 | 34.463 | 0.000149726 | 0.000088555 | 0.59  | 0.263 |
| 955 | 1338AU05#2775#sorbitol-6-P   | 315 | 34.463 | 0.000111148 | 0.000077248 | 0.69  | 0.362 |
| 956 | 1338AU07#2713#gal-6-P MX1    | 299 | 33.813 | 0.006307509 | 0.008616761 | 1.37  | 0.624 |
| 957 | 1338AU07#2713#gal-6-P MX1    | 387 | 33.813 | 0.003681053 | 0.007456389 | 2.03  | 0.340 |
| 958 | 1338AU07#2713#gal-6-P MX1    | 160 | 33.813 | 0.002158937 | 0.003562653 | 1.65  | 0.434 |
| 959 | 1338AU07#2745#gal-6-P MX2    | 387 | 34.107 | 0.000625034 | 0.001468894 | 2.35  | 0.249 |
| 960 | 1338AU12#1860#glyceric-3-P   | 299 | 25.932 | 0.001223204 | 0.000644536 | 0.53  | 0.096 |
| 961 | 1338AU12#1860#glyceric-3-P   | 387 | 25.932 | 0.000329574 | 0.000274939 | 0.83  | 0.807 |
| 962 | 1338AU12#1860#glyceric-3-P   | 459 | 25.932 | 0.000667391 | 0.000116184 | 0.17  | 0.399 |
| 963 | 1340AU03#1851#p-aminobenzoic | 266 | 26.300 | 0.000715823 | 0.000445309 | 0.62  | 0.049 |
| 964 | 1340AU03#1851#p-aminobenzoic | 281 | 26.300 | 0.000552920 | 0.000400743 | 0.72  | 0.447 |
| 965 | 1340AU03#1851#p-aminobenzoic | 222 | 26.300 | 0.002069685 | 0.001429225 | 0.69  | 0.651 |
| 966 | 1340AU04#0792#norleucine 2   | 158 | 16.236 | 0.000095311 | 0.000127361 | 1.34  | 0.636 |
| 967 | 1340AU04#0792#norleucine 2   | 232 | 16.236 | 0.000084340 | 0.000071988 | 0.85  | 0.570 |
| 968 | 1340AU04#0792#norleucine 2   | 260 | 16.236 | 0.000112109 | 0.000137771 | 1.23  | 0.580 |
| 969 | 1340AU06#1981#allantoin 4    | 331 | 27.205 | 0.194120250 | 0.174451960 | 0.90  | 0.777 |
| 970 | 1340AU06#1981#allantoin 4    | 431 | 27.205 | 0.046827371 | 0.033697552 | 0.72  | 0.244 |
| 971 | 1340AU06#1981#allantoin 4    | 446 | 27.205 | 0.039174949 | 0.032540507 | 0.83  | 0.583 |
| 972 | 1340AU06#2014#allantoin 5    | 518 | 27.512 | 0.000422514 | 0.002353718 | 5.57  | 0.040 |
| 973 | 1340AU06#2014#allantoin 5    | 428 | 27.512 | 0.000355054 | 0.001595304 | 4.49  | 0.068 |
| 974 | 1340AU06#2014#allantoin 5    | 403 | 27.512 | 0.628369781 | 0.001252175 | 0.00  | 0.392 |
| 975 | 1340AU07#1942#adenine        | 264 | 26.916 | 0.064065832 | 0.012058313 | 0.19  | 0.388 |
| 976 | 1340AU07#1942#adenine        | 279 | 26.916 | 0.065053908 | 0.001011504 | 0.02  | 0.180 |
| 977 | 1340AU07#1942#adenine        | 192 | 26.916 | 0.001876016 | 0.001064404 | 0.57  | 0.181 |
| 978 | 1340AU09#2378#guanine        | 352 | 31.071 | 0.000534240 | 0.000182862 | 0.34  | 0.238 |
| 979 | 1340AU09#2378#guanine        | 367 | 31.071 | 0.000150548 | 0.000063228 | 0.42  | 0.176 |
| 980 | 1340AU09#2378#guanine        | 264 | 31.071 | 0.000337105 | 0.000304601 | 0.90  | 0.729 |
| 981 | 1340AU10#1717#aconitic       | 285 | 24.894 | 0.003201435 | 0.002180760 | 0.68  | 0.516 |
| 982 | 1340AU10#1717#aconitic       | 375 | 24.894 | 0.006267753 | 0.002594387 | 0.41  | 0.427 |
| 983 | 1340AU10#1717#aconitic       | 229 | 24.894 | 0.013743442 | 0.007454312 | 0.54  | 0.461 |
| 984 | 1340AU11#2058#p-coumaric     | 249 | 28.101 | 0.000788985 | 0.003504440 | 4.44  | 0.000 |
| 985 | 1340AU11#2058#p-coumaric     | 293 | 28.101 | 0.001710785 | 0.001321545 | 0.77  | 0.247 |
| 986 | 1340AU11#2058#p-coumaric     | 308 | 28.101 | 0.001436526 | 0.002381115 | 1.66  | 0.420 |
| 987 | 1340AU12#1826#o-coumaric     | 293 | 25.885 | 0.004099773 | 0.003293120 | 0.80  | 0.731 |
| 988 | 1340AU12#1826#o-coumaric     | 308 | 25.885 | 0.002020535 | 0.000475794 | 0.24  | 0.376 |
| 989 | 1340AU12#1826#o-coumaric     | 161 | 25.885 | 0.006704389 | 0.002786976 | 0.42  | 0.021 |
| 990 | 1340AU14#3254#adenosine      | 322 | 38.986 | 0.000087951 | 0.000103225 | 1.17  | 0.494 |
| 991 | 1340AU14#3254#adenosine      | 465 | 38.986 | 0.000122274 | 0.000116957 | 0.96  | 0.910 |

|      |                                |         |        |             |             |             |              |
|------|--------------------------------|---------|--------|-------------|-------------|-------------|--------------|
| 992  | 1340AU14#3254#adenosine        | 540     | 38.986 | 0.000324320 | 0.000018451 | 0.06        | 0.392        |
| 993  | 1340AU15#2109#indole-3-acetic  | 202     | 28.475 | 0.001660661 | 0.000235741 | 0.14        | 0.319        |
| 994  | 1340AU15#2109#indole-3-acetic  | 319     | 28.475 | 0.001645346 | 0.001694886 | 1.03        | 0.931        |
| 995  | 1340AU15#2109#indole-3-acetic  | 276     | 28.475 | 0.001558497 | 0.000123845 | 0.08        | 0.356        |
| 996  | 1340AU18#2564#spermidine       | 156     | 32.807 | 0.019245631 | 0.003728528 | 0.19        | 0.437        |
| 997  | 1340AU20#1028#S-me-cysteine 2  | 162     | 18.434 | 0.002013459 | 0.007949703 | <b>3.95</b> | <b>0.009</b> |
| 998  | 1340AU20#1028#S-me-cysteine 2  | 218     | 18.434 | 0.002103898 | 0.002124315 | 1.01        | 0.964        |
| 999  | 1340AU20#1028#S-me-cysteine 2  | 236     | 18.434 | 0.009606447 | 0.001068465 | 0.11        | 0.395        |
| 1000 | 1340AU21#0999#glutaric         | 158     | 18.132 | 0.002251241 | 0.001844307 | 0.82        | 0.216        |
| 1001 | 1340AU21#0999#glutaric         | 261     | 18.132 | 0.001378398 | 0.001278302 | 0.93        | 0.787        |
| 1002 | 1340AU21#0999#glutaric         | 233     | 18.132 | 0.000574618 | 0.000377318 | 0.66        | 0.094        |
| 1003 | 2009AU02#4302                  | 204     | 46.743 | 0.015260477 | 0.001319016 | 0.09        | 0.405        |
| 1004 | 2009AU02#4302                  | 191     | 46.743 | 0.007257180 | 0.004472396 | 0.62        | 0.556        |
| 1005 | 2009AU02#4302                  | 259     | 46.743 | 0.000362285 | 0.000245694 | 0.68        | 0.499        |
| 1006 | 2009AU04#3664#melibiose MX1    | 204     | 40.845 | 0.007188742 | 0.016053205 | <b>2.23</b> | <b>0.038</b> |
| 1007 | 2009AU04#3664#melibiose MX1    | 361     | 40.845 | 0.002913946 | 0.007787842 | <b>2.67</b> | <b>0.030</b> |
| 1008 | 2009AU04#3664#melibiose MX1    | 480     | 40.845 | 0.000108319 | 0.000349548 | <b>3.23</b> | <b>0.019</b> |
| 1009 | 2009AU04#4352#melezitose       | 361     | 47.192 | 0.000084581 | 0.000109308 | 1.29        | 0.501        |
| 1010 | 2009AU04#4352#melezitose       | 451     | 47.192 | 0.000058427 | 0.000059311 | 1.02        | 0.954        |
| 1011 | 2009AU04#4352#melezitose       | 271     | 47.192 | 0.000097348 | 0.000062785 | 0.64        | 0.416        |
| 1012 | 2009AU07#3699#melibiose MX2    | 204     | 41.168 | 0.001187690 | 0.002722820 | <b>2.29</b> | <b>0.023</b> |
| 1013 | 2009AU07#3699#melibiose MX2    | 361     | 41.168 | 0.000557862 | 0.001454288 | <b>2.61</b> | <b>0.028</b> |
| 1014 | 2009AU07#3699#melibiose MX2    | 160     | 41.168 | 0.000202143 | 0.000544960 | <b>2.70</b> | <b>0.030</b> |
| 1015 | 2009AU13#3506#trehalose        | 169     | 39.356 | 0.027997516 | 0.001676866 | 0.06        | 0.053        |
| 1016 | 2009AU13#3506#trehalose        | 361     | 39.356 | 0.059962315 | 0.008081474 | <b>0.13</b> | <b>0.040</b> |
| 1017 | 2015BV03#0799#serine 2         | 219     | 14.818 | 0.050183867 | 0.164064026 | <b>3.27</b> | <b>0.001</b> |
| 1018 | 2015BV03#1056#serine 3         | 204     | 17.133 | 0.677968993 | 1.527944785 | <b>2.25</b> | <b>0.025</b> |
| 1019 | 2015BV03#1056#serine 3         | 278     | 17.133 | 0.038917721 | 0.087368595 | <b>2.24</b> | <b>0.030</b> |
| 1020 | 2015BV30#2713#tryptamine       | 174     | 32.434 | 0.001426448 | 0.002131900 | 1.49        | 0.459        |
| 1021 | 2015BV30#2713#tryptamine       | 273     | 32.434 | 0.000113422 | 0.000190791 | 1.68        | 0.343        |
| 1022 | 2015BV30#2713#tryptamine       | 361     | 32.434 | 0.009417697 | 0.000170781 | 0.02        | 0.394        |
| 1023 | 2066BN03#1003#nicotine         | 84      | 16.891 | 0.040887062 | 0.001357066 | 0.03        | 0.390        |
| 1024 | 2066BN03#1003#nicotine         | 133     | 16.891 | 0.158668655 | 0.138516364 | 0.87        | 0.837        |
| 1025 | 2066BN03#1003#nicotine         | 161+162 | 16.891 | 0.006236001 | 0.026192100 | 4.20        | 0.159        |
| 1026 | 2066BN03#1003#nicotine         | 85      | 16.891 | 0.002624836 | 0.003552021 | 1.35        | 0.695        |
| 1027 | 2066BN03#1382#salicylic        | 267     | 20.265 | 0.003506008 | 0.005141205 | 1.47        | 0.140        |
| 1028 | 2066BN03#1382#salicylic        | 268     | 20.265 | 0.001034903 | 0.001491603 | 1.44        | 0.148        |
| 1029 | 2066BN03#1382#salicylic        | 209     | 20.265 | 0.000678044 | 0.000810665 | 1.20        | 0.160        |
| 1030 | 2066BN03#1382#salicylic        | 91      | 20.265 | 0.003229301 | 0.001068645 | 0.33        | 0.426        |
| 1031 | 2066BN03#1722#t-o-coumaric     | 190     | 23.300 | 0.002226128 | 0.002394789 | 1.08        | 0.871        |
| 1032 | 2066BN03#1722#t-o-coumaric     | 293     | 23.300 | 0.000626762 | 0.000310734 | 0.50        | 0.427        |
| 1033 | 2066BN03#1722#t-o-coumaric     | 308     | 23.300 | 0.001643394 | 0.001512193 | 0.92        | 0.603        |
| 1034 | 2066BN03#1722#t-o-coumaric     | 161     | 23.300 | 0.004101349 | 0.001634880 | 0.40        | 0.281        |
| 1035 | 2077BN06#1973#galactonic       | 333     | 28.978 | 0.021542766 | 0.013865641 | 0.64        | 0.336        |
| 1036 | 2077BN06#1973#galactonic       | 292     | 28.978 | 0.032474324 | 0.040765753 | 1.26        | 0.520        |
| 1037 | 2077BN06#1973#galactonic       | 423     | 28.978 | 0.001743328 | 0.000912078 | 0.52        | 0.344        |
| 1038 | 2077BN06#1973#galactonic       | 433     | 28.978 | 0.003351911 | 0.003466334 | 1.03        | 0.894        |
| 1039 | 2077BN07#1944#gulonic          | 333     | 28.433 | 0.005012206 | 0.005392017 | 1.08        | 0.618        |
| 1040 | 2077BN07#1944#gulonic          | 292     | 28.433 | 0.004076369 | 0.005094759 | 1.25        | 0.491        |
| 1041 | 2077BN07#1944#gulonic          | 423     | 28.433 | 0.000463283 | 0.000401250 | 0.87        | 0.396        |
| 1042 | 2077BN07#1944#gulonic          | 433     | 28.433 | 0.003487127 | 0.000465668 | 0.13        | 0.370        |
| 1043 | 2077BN11#1910#glucuronic MX1   | 333     | 28.018 | 0.005184454 | 0.004649168 | 0.90        | 0.599        |
| 1044 | 2077BN11#1910#glucuronic MX1   | 160     | 28.018 | 0.003761140 | 0.003635951 | 0.97        | 0.927        |
| 1045 | 2077BN11#1910#glucuronic MX1   | 423     | 28.018 | 0.005047415 | 0.000296898 | 0.06        | 0.388        |
| 1046 | 2077BN11#1932#glucuronic MX2   | 160     | 28.245 | 0.002797808 | 0.002689293 | 0.96        | 0.934        |
| 1047 | 2077BN11#1932#glucuronic MX2   | 292     | 28.245 | 0.003707812 | 0.004753141 | 1.28        | 0.520        |
| 1048 | 2077BN11#1932#glucuronic MX2   | 393     | 28.245 | 0.001469873 | 0.003511795 | 2.39        | 0.428        |
| 1049 | 2081BN03#2686#t-3,5ME4OHcin MX | 174     | 30.838 | 0.001391739 | 0.002665351 | 1.92        | 0.093        |
| 1050 | 2081BN03#2686#t-3,5ME4OHcin MX | 248     | 30.838 | 0.000269646 | 0.000150284 | 0.56        | 0.163        |
| 1051 | 2081BN03#2686#t-3,5ME4OHcin MX | 309     | 30.838 | 0.000259153 | 0.000161341 | 0.62        | 0.246        |
| 1052 | 2081BN04#2381#coniferyl alcol  | 324     | 28.143 | 0.001207546 | 0.001267489 | 1.05        | 0.812        |
| 1053 | 2081BN04#2381#coniferyl alcol  | 293     | 28.143 | 0.001451923 | 0.001160150 | 0.80        | 0.614        |
| 1054 | 2081BN04#2381#coniferyl alcol  | 235     | 28.143 | 0.000886748 | 0.000410474 | 0.46        | 0.263        |



|      |                               |     |        |             |             |      |       |
|------|-------------------------------|-----|--------|-------------|-------------|------|-------|
| 1055 | 2081BN05#2389#t-3ME4OHcin MX2 | 248 | 28.252 | 0.000680091 | 0.000440490 | 0.65 | 0.578 |
| 1056 | 2081BN05#2389#t-3ME4OHcin MX2 | 279 | 28.252 | 0.000959795 | 0.000224052 | 0.23 | 0.292 |
| 1057 | 2081BN05#2389#t-3ME4OHcin MX2 | 218 | 28.252 | 0.002682203 | 0.003407635 | 1.27 | 0.493 |
| 1058 | 2081BN05#2406#t-3ME4OHcin MX1 | 279 | 28.437 | 0.000354350 | 0.000050122 | 0.14 | 0.000 |
| 1059 | 2081BN05#2406#t-3ME4OHcin MX1 | 248 | 28.437 | 0.000259623 | 0.000251487 | 0.97 | 0.950 |
| 1060 | 2081BN05#2406#t-3ME4OHcin MX1 | 218 | 28.437 | 0.001678036 | 0.002743472 | 1.63 | 0.587 |
| 1061 | 2081BN06#2646#sinapyl alkol   | 354 | 30.473 | 0.000529956 | 0.000404506 | 0.76 | 0.186 |
| 1062 | 2081BN06#2646#sinapyl alkol   | 234 | 30.473 | 0.001132191 | 0.001462333 | 1.29 | 0.427 |
| 1063 | 2081BN06#2646#sinapyl alkol   | 323 | 30.473 | 0.006217185 | 0.000884390 | 0.14 | 0.246 |
| 1064 | 2081BN09#3943                 | 556 | 41.942 | 0.000015291 | 0.000023022 | 1.51 | 0.543 |
| 1065 | 2081BN09#3943                 | 526 | 41.942 | 0.000032642 | 0.000014325 | 0.44 | 0.176 |
| 1066 | 2081BN09#3943                 | 279 | 41.942 | 0.001339272 | 0.000146591 | 0.11 | 0.421 |
| 1067 | 2081BN33#3156                 | 174 | 35.040 | 0.000266148 | 0.001047932 | 3.94 | 0.046 |
| 1068 | 2081BN33#3156                 | 324 | 35.040 | 0.000048521 | 0.000123493 | 2.55 | 0.010 |
| 1069 | 2081BN33#3156                 | 455 | 35.040 | 0.000563549 | 0.000034363 | 0.06 | 0.399 |
| 1070 | 2081BN33#3665                 | 556 | 39.454 | 0.000019912 | 0.000009530 | 0.48 | 0.110 |
| 1071 | 2081BN33#3665                 | 526 | 39.454 | 0.000070805 | 0.000034689 | 0.49 | 0.337 |
| 1072 | 2081BN33#3665                 | 279 | 39.454 | 0.002385152 | 0.000170990 | 0.07 | 0.392 |
